# Supplementary material for: Evaluation of person-level heterogeneity of treatment effects in published multiperson N-of-1 studies: systematic review and reanalysis
Source: PubMed Central journal article supplement — BMJ Open. 2018 May 26;8(5):e017641. doi: 10.1136/bmjopen-2017-017641 (PMC5988083; doi:10.1136/bmjopen-2017-017641), 2018-05-26
Supplement: bmjopen-2017-017641.draft_revisions.pdf [file bmjopen-2017-017641.draft_revisions.pdf]

# BMJ Open

BMJ Open is committed to open peer review. As part of this commitment we make the peer review history of every article we publish publicly available.

When an article is published we post the peer reviewers' comments and the authors' responses online. We also post the versions of the paper that were used during peer review. These are the versions that the peer review comments apply to.

The versions of the paper that follow are the versions that were submitted during the peer review process. They are not the versions of record or the final published versions. They should not be cited or distributed as the published version of this manuscript.

BMJ Open is an open access journal and the full, final, typeset and author-corrected version of record of the manuscript is available on our site with no access controls, subscription charges or pay-per-view fees (<http://bmjopen.bmj.com>).

If you have any questions on BMJ Open's open peer review process please email [info.bmjopen@bmj.com](mailto:info.bmjopen@bmj.com)

# BMJ Open

## Evaluation of person-level heterogeneity of treatment effects in published multi-person N-of-1 studies: systematic review and re-analysis

|                               |                                                                                                                                                                                                                                                                                                                                                                                                                                                            |
|-------------------------------|------------------------------------------------------------------------------------------------------------------------------------------------------------------------------------------------------------------------------------------------------------------------------------------------------------------------------------------------------------------------------------------------------------------------------------------------------------|
| Journal:                      | <i>BMJ Open</i>                                                                                                                                                                                                                                                                                                                                                                                                                                            |
| Manuscript ID                 | bmjopen-2017-017641                                                                                                                                                                                                                                                                                                                                                                                                                                        |
| Article Type:                 | Research                                                                                                                                                                                                                                                                                                                                                                                                                                                   |
| Date Submitted by the Author: | 08-May-2017                                                                                                                                                                                                                                                                                                                                                                                                                                                |
| Complete List of Authors:     | Raman, G; Tufts Medical Center<br>Balk, EM; Brown University<br>Lai, Lana; Tufts Medical Center<br>Shi, Jennifer; Tufts Medical Center<br>Chan, Jeffrey; VA Boston Healthcare System, Center for Healthcare Organization and Implementation Research (CHOIR)<br>Lutz, Jennifer; Tufts Medical Center<br>Dubois, Robert; National Pharmaceutical Council, Research<br>Kravitz, Richard; University of California Davis<br>Kent, David; Tufts Medical Center |
| Keywords:                     | personalized medicine, n-of-1 studies, systematic review, heterogeneity of treatment effect                                                                                                                                                                                                                                                                                                                                                                |
|                               |                                                                                                                                                                                                                                                                                                                                                                                                                                                            |

SCHOLARONE™  
Manuscripts

1  
2  
3 **Evaluation of person-level heterogeneity of treatment effects in published multi-person N-**  
4 **of-1 studies: systematic review and re-analysis**  
5  
6  
7  
8  
9

10 Gowri Raman, MD, MS<sup>a</sup>; Ethan M Balk, MD, MPH<sup>b</sup>; Lana Lai, MS<sup>c</sup>; Jennifer Shi, BA<sup>d</sup>; Jeff  
11 Chan, MD<sup>a,e</sup>; Jennifer Lutz, MA<sup>c</sup>; Robert Dubois, MD, PhD<sup>f</sup>; Richard L Kravitz, MD, MSPH<sup>g</sup>;  
12 David M Kent, MD, MS<sup>\*c</sup>  
13  
14  
15

16 <sup>a</sup>Center for Clinical Evidence Synthesis, ICRHPS, Medical Center/Tufts University School of  
17 Medicine, Boston, USA; <sup>b</sup>Center for Evidence Synthesis in Health, School of Public Health,  
18 Brown University, Providence, RI; <sup>c</sup>Predictive Analytics and Comparative Effectiveness Center,  
19 Institute for Clinical Research and Health Policy Studies, Tufts Medical Center/Tufts University  
20 School of Medicine, Boston, USA; <sup>d</sup>Center for the Evaluation of Value and Risk in Health,  
21 ICRHPS, Medical Center/Tufts University School of Medicine, Boston, USA; <sup>e</sup>VA Boston  
22 Healthcare System, Center for Healthcare Organization and Implementation Research (CHOIR);  
23 <sup>f</sup>National Pharmaceutical Council; <sup>g</sup>Department of Internal Medicine, University of California,  
24 Davis  
25  
26  
27  
28  
29  
30

31 **Corresponding Author:**

32 David Kent, MD, MS  
33 Director, Predictive Analytics and Comparative Effectiveness (PACE) Center  
34 Institute for Clinical Research and Health Policy Studies  
35 Tufts Medical Center  
36 800 Washington St, Box 63  
37 Boston, MA 02111  
38 Email: [dkent1@tuftsmedicalcenter.org](mailto:dkent1@tuftsmedicalcenter.org)  
39 Phone: 617-636-3234  
40  
41  
42

43 **Running title: Variation in person-level treatment effects: systematic review**

44 **Word count**

45 Abstract: 228  
46 Main text: 3,970 (main text, references)  
47 Table: 5  
48 Figures: 3

49 **Key words:** n-of-1 studies, systematic review, heterogeneity of treatment effect, personalized  
50 medicine  
51  
52  
53  
54  
55  
56  
57  
58  
59  
60

## Abstract

**Objective:** Individual patients with the same condition may respond differently to similar treatments. Our aim is to summarize the reporting of person-level heterogeneity of treatment effects (HTE) in multi-person N-of-1 studies and to examine the evidence for person-level HTE through re-analysis.

**Study Design:** Systematic review and re-analysis of multi-person N-of-1 studies.

**Data sources:** Medline, Cochrane Controlled Trials, EMBASE, Web of Science, and review of references through March 2014 for N-of-1 studies published in English.

**Study Selection:** N-of-1 studies of pharmacological interventions with at least two subjects.

**Data Synthesis:** Citation screening and data extractions were performed in duplicate. We performed statistical reanalysis testing for person-level HTE on all studies presenting person-level data.

**Results:** We identified 56 multi-person N-of-1 studies with at least two subjects. Statistical tests examining HTE were described in only nine (11%), of which only two (2%) tested person-level HTE. Only 23 studies (19%) in 24 data points provided person-level data sufficient to re-analyze person-level HTE. Reanalysis using a fixed effect linear model identified statistically significant person-level HTE in 8 of the 11 studies (73%) reporting person-level treatment effects and in 8 of the 13 studies (62%) reporting person-level outcomes.

**Conclusions:** Our analysis suggests person-level HTE is common and often substantial. Reviewed studies had incomplete information on person-level treatment effects and their variation. Improved assessment and reporting of person-level treatment effects in multi-person N-of-1 studies are needed.

**Strengths and limitations of this study**

- Multi-person N-of-1 studies are one of the best designs to estimate individual patient treatment effects and compare the variation in effects between individuals to variation within individuals across different periods
- This review highlights incomplete reporting of person-level treatment effects and their variation in multi-person N-of-1 studies.
- Re-analysis suggests person-level HTE is common and often substantial in multi-person N-of-1 studies.
- With improved assessment and reporting, multi-person N-of-1 studies have the potential to be important tools for personalized medicine.
- N-of-1 studies may be highly clinically informative for condition-treatments with a high degree of person-level HTE.

## Introduction

Clinicians commonly observe that individual patients given the same treatment for the same condition frequently respond differently from one another. This observation, combined with our understanding of the complex mechanisms of diseases and therapies and the potential importance of myriad patient-specific factors (e.g., age, sex, illness severity, comorbidities, co-treatments, and molecular differences influencing pharmacokinetics and -dynamics), have led to a widely held assumption that the observed variation in treatment response seen between individuals is not merely random, but stable and potentially predictable. This assumption underpins the field of personalized medicine, which aims to determine the best treatment for an individual patient, as opposed to treating all patients with the same intervention found to be most effective for the “average” patient.

Nevertheless, statistical analyses aimed at discovering heterogeneity of treatment effects (HTE) among groups of individuals (for example subgroup analyses of parallel arm randomized trials) typically fail to find compelling and reliable evidence for the presence of such heterogeneity. Similarly, the field of pharmacogenetics, also built on the assumption of stable variation in treatment responses, has largely failed to live up to its promise to broadly improve the targeting of drugs—particularly outside the special case of oncology (where studies generally depend on the subclassification of tumor tissue not on variation in germline polymorphisms).<sup>1,2</sup> This failure to find reproducible HTE has supported the contrarian notion that true individual effects may be a “myth,” an over-interpretation of random noise.<sup>3</sup>

To distinguish between these two possibilities, Kalow et al.<sup>4</sup> have suggested that carefully designed series of N-of-1 studies could be performed for those chronic conditions amenable to this design (i.e., where the disease process is relatively stable over time, treatment effects are

1  
2  
3 transient, and outcomes vary and are observable over time). By estimating individual patient  
4 treatment effects and comparing the variation in effects between individuals to variation within  
5 individuals across different periods, it is possible to determine heterogeneity in individual  
6 treatment effects—even if one is unable to identify the variables that predict this variation (i.e.,  
7 even in the absence of group-level HTE, such as men versus women, or old versus young).  
8  
9

10  
11  
12 A recent review<sup>5</sup> summarized N-of-1 studies reported in the literature—including multi-  
13 person N-of-1 studies—but did not examine whether and how these studies provide information  
14 on person-level HTE. Therefore our objectives are: 1) to summarize the conduct and reporting of  
15 assessments of variation in person-level treatment effects from N-of-1 studies; and 2) to extract,  
16 reanalyze and report the results from the subset of studies that provided adequate data in their  
17 published reports to examine the extent of the evidence for person-level HTE (i.e., participant-  
18 level outcomes or effects).  
19  
20  
21  
22  
23  
24  
25  
26  
27  
28  
29  
30  
31  
32

### 33 **Methods**

34  
35  
36 This review was conducted in accordance with the highest standards for conducting  
37 systematic reviews.<sup>6,7</sup> We defined N-of-1 studies as crossover trials in which each patient  
38 receives two or more treatments in a pre-defined, often randomized, sequence.  
39  
40  
41  
42  
43

### 44 ***Data Sources and Searches***

45  
46  
47 We used two separate searches because N-of-1 studies can be indexed differently: (1) a  
48 search in Medline, Cochrane Central and EMBASE using terms related to repeated crossover  
49 studies (for publications indexed from inception to March 21, 2014); and (2) a Medline,  
50  
51  
52  
53  
54  
55  
56  
57  
58  
59  
60

1  
2  
3 (for publications indexed from 2011 to March 21, 2014). For N-of-1 studies indexed before  
4  
5 2011, we used studies included in a prior published systematic review by Gabler et al.<sup>5</sup> Our  
6  
7 searches combined terms and Medical Subject Headings for N-of-1, single-subject, single-  
8  
9 patient, randomized trials, crossover, multi-period crossover, and rotated or repeated period  
10  
11 crossover (see Appendix Tables 1-2 for detailed search terms). The searches were not restricted  
12  
13 by disease, condition, organ system, or treatment.  
14  
15  
16  
17  
18

### 19 *Study Selection*

20  
21 We selected eligible multi-person N-of-1 studies to describe the frequency of reporting of  
22  
23 individual outcomes and effects and of documented HTE in these studies. We required that a  
24  
25 minimum of two individual subjects per study for evaluation of HTE. We excluded studies that  
26  
27 included non-pharmacological interventions, reviews, abstracts and protocols. We include  
28  
29 studies with placebo or “no treatment” interventions. Citations were double-screened by  
30  
31 reviewers using an open-source, online software Abstrackr (<http://abstrackr.cebm.brown.edu/>).  
32  
33 Full-text articles of potentially relevant studies were again double screened for eligibility.  
34  
35  
36

37  
38 Person-level outcomes were defined as outcomes for each person at each point in time  
39  
40 when they were measured, reported in tables, text, or graphs. Person-level treatment effect was  
41  
42 defined as contrasts of outcomes in individuals on one treatment versus the comparator. Person-  
43  
44 level HTE was defined as quantified variation in the person-level treatment effects, whereas HTE  
45  
46 more broadly includes any type of subgroup analysis (e.g., males versus females; older versus  
47  
48 younger) as outlined in **Figure 1**.  
49

### 50 *Data Extraction and Quality Assessment*

51  
52 One of four reviewers extracted data from each publication; a second reviewer verified  
53  
54  
55  
56  
57  
58  
59  
60



1  
2  
3 all numerical information and basic descriptors of the study design and analysis. Operational  
4 definitions for extraction items were discussed in weekly project meetings and discrepancies  
5 between extractors were resolved by consensus with senior authors (DK, GR, EB). From each  
6 study, we extracted bibliographic information, details related to study design (number of patients  
7 enrolled, selection criteria, interventions evaluated, randomization methods, outcomes assessed,  
8 follow-up duration), information on patient characteristics, and person-level measurements of  
9 outcomes or estimates of person-level treatment effects (with corresponding measures of their  
10 uncertainty). When necessary, we extracted data by digitizing the graphs and the values were  
11 estimated using Engauge Digitizer version 2.14 (<http://digitizer.sourceforge.net/>).  
12  
13  
14  
15  
16  
17  
18  
19  
20  
21  
22  
23

24 We generated graphs showing the trajectory of response for each patient in each study  
25 and compared them against the published information. We also generated scatterplots of  
26 measurements over time for studies that did not present their data in graphical format to help us  
27 identify aberrant data points (e.g., errors in data extraction). We verified potentially aberrant data  
28 points by re-examining the published data and made corrections, when needed.  
29  
30  
31  
32  
33  
34

### 35 ***Data Synthesis and Analyses***

36  
37 We examined the degree to which studies reported person-level data. This was described  
38 using the following items for each reported outcome: 1) qualitative descriptions of HTE (e.g.,  
39 “there were 8 responders and 4 non-responders”); 2) details of person-level outcomes (i.e.,  
40 outcomes with each treatment within each period); 3) details of person-level treatment effect  
41 (i.e., a point estimate of contrasts of outcomes in individuals on one treatment versus the  
42 comparator); 4) reporting of person-level statistical effect estimate, (e.g., standard deviation,  
43 exact P values, or confidence intervals for treatment effects within individuals); 5) description of  
44 statistical tests examining HTE (i.e., tests evaluating the contrast of treatment effects between  
45  
46  
47  
48  
49  
50  
51  
52  
53  
54  
55  
56  
57  
58  
59  
60

1  
2  
3 individuals or groups in the study); and 6) claims of HTE. Note that qualitative descriptions of  
4  
5 HTE for item 1 would include any description that implied that treatment effects varied, whereas  
6  
7 item 6 required a more definite study conclusion (e.g., “our results demonstrate significant  
8  
9 variation across individuals in response to treatment X”), whether or not these conclusions were  
10  
11 based on robust statistical tests.  
12  
13

### 14 ***Statistical HTE analysis of extracted study results***

15  
16  
17 We performed statistical analysis testing for person-level HTE on all studies presenting  
18  
19 person-level data. We used a consistent analytic strategy across studies, to the extent permitted  
20  
21 by the reporting in published papers. Our strategy was different for studies that reported person-  
22  
23 level outcome measurements and those that reported estimates of person-level treatment effects  
24  
25 with their sampling variances (or adequate information to approximately calculate these  
26  
27 statistics).  
28  
29

30  
31 For studies that only reported (or allowed the calculation of) *estimates of person-level*  
32  
33 *treatment effects*, we obtained an average effect using a fixed effect inverse variance model and  
34  
35 estimated the variance of the person-level treatment effects using a method of moments  
36  
37 estimator. In addition to a fixed effect model, we also obtained an average effect using a random  
38  
39 effects model. Finally, we tested the hypothesis that all person-level treatment effects were equal  
40  
41 using Cochran’s chi-square test and quantified the proportion of observed variation due to “true”  
42  
43 person-level effect heterogeneity with the  $I^2$  statistic.<sup>8</sup>  
44  
45

46  
47 For studies that reported *person-level outcomes*, we developed a linear model (for  
48  
49 continuous outcomes) or generalized linear model (for binary or count outcomes) using the  
50  
51 outcome of interest as the response, the intervention(s) as a covariate; indicator variables for  
52  
53 different study participants were derived. This model estimates a common treatment effect across  
54  
55  
56  
57  
58  
59  
60

1  
2  
3 participants. We also derived a similar model with treatment-by-participant interactions. This  
4  
5 model allows each patient to have a different effect. The statistical significance of person-level  
6  
7 HTE was assessed by a likelihood ratio test comparing the two models. In addition to a fixed  
8  
9 effect model, we also fit a hierarchical linear or generalized linear mixed model with a random  
10  
11 intercept and a random slope (for the treatment effect) to estimate the average treatment effect  
12  
13 across all patients (assuming person-level HTE). We tested the hypothesis that all person-level  
14  
15 treatment effects were equal and quantified the proportion of observed variation due to ‘true’  
16  
17 person-level effect heterogeneity with the  $I^2$  statistic.<sup>8</sup>  
18  
19  
20  
21  
22  
23

## 24 **Results**

25  
26 The searches for repeated crossover studies identified 10,596 citations and those for N-  
27  
28 of-1 studies identified 2676 citations (indexed from 2011 onwards). Of these, we retrieved 373  
29  
30 full-text articles for review plus 100 N-of-1 trial articles (indexed before 2011) from an existing  
31  
32 systematic review.<sup>5</sup> Upon full-text screening, 56 studies (52 multi-person N-of-1 studies and four  
33  
34 repeated period crossover studies) met eligibility criteria (Appendix Table 3) and are reported  
35  
36 multi-person N-of-1 studies throughout the article. An outline of the search and study selection  
37  
38 flow is provided in **Figure 2**.  
39  
40  
41  
42  
43  
44

### 45 *Description of studies*

46  
47 **Table 1** summarizes the 56 multi-person N-of-1 studies that were published between  
48  
49 1986 and 2014 reporting a total of 1974 patients. The most common clinical domains in the  
50  
51 multi-person N-of-1 studies were neurology (23%), arthritis/rheumatology (18%) and psychiatry  
52  
53 (16%). Most studies were described as “double-blind” but details about the methods for blinding  
54  
55  
56  
57  
58  
59  
60

1  
2  
3 were often unclear; similarly studies often provided unclear information about the generation of  
4 the randomization sequence and allocation concealment. Among the studies, 93% compared a  
5 pair of treatment strategies, 5% compared three strategies, and 2% compared four strategies.  
6  
7 Studies had between 3 and 16 treatment periods and obtained an average of 1 to 42 outcome  
8 measurements per period. Across reported outcomes, 89% of the assessed outcomes were  
9 patient-reported and 11% were investigator-assessed.  
10  
11  
12  
13  
14  
15  
16  
17  
18

### 19 *Reporting Person-level outcomes, effects and HTE*

20  
21 While most studies (95%) had some qualitative acknowledgement that the treatment  
22 effects appeared to vary across individuals, formal reporting at the participant level was variable  
23 (Table 2). Person-level outcomes under each treatment were reported in 48% of multi-person N-  
24 of-1 studies. Person-level treatment effects with quantitative data (comparing outcomes on each  
25 treatment) for each individual who completed the trial was available in 29%; and details on the  
26 statistical evaluation of these effects (as standard deviations or exact P values or confidence  
27 intervals) were available in only two multi-person N-of-1 study. Only four (7%) studies  
28 described statistical tests examining any HTE. However, only two studies reported person-level  
29 HTE, whereas the other two examined group-level HTE using conventional subgroups.  
30  
31  
32  
33  
34  
35  
36  
37  
38  
39  
40  
41  
42  
43  
44

### 45 **Reanalysis of person-level data:**

46  
47 Of the 56 studies, there were 31 studies that provided person-level data, either as  
48 outcomes in each treatment period or as person-level treatment effects (Table 3). Of these, only  
49 23 studies provided person-level data sufficient to support re-analysis: 13 studies provided  
50 person-level outcomes; 11 studies provided person-level treatment effects (one study provided  
51  
52  
53  
54  
55  
56  
57  
58  
59  
60

1  
2  
3 both). The remaining eight studies reported either medians or means without data on variance, so  
4 they could not be re-analyzed for treatment effect or HTE.  
5  
6

7  
8 Of 11 studies (with 19 unique comparisons) that reported analyzable person-level  
9 treatment effect data (**Table 3**), seven studies had a placebo comparator and three studies  
10 compared had an active comparator. The sample size ranged from 7 to 68; average crossover  
11 periods ranged from 6 to 16 days; and average outcome measures per period ranged from 1 to 21.  
12  
13 The average treatment duration ranged from 14 to 336 days.  
14  
15  
16  
17

18  
19 There were 13 studies (with 26 unique comparisons) that reported analyzable person-  
20 level outcome data (**Table 3**), including one study also reporting person-level outcomes. Of  
21 these, 10 compared the intervention with placebo and three studies compared two active  
22 interventions. The sample size ranged from 2 to 22; the average number of crossover periods  
23 ranged from 3 to 10; and the average number of outcome measures per period ranged from 1 to  
24  
25 42. The average treatment duration ranged from 9 to 210 days.  
26  
27  
28  
29  
30  
31  
32

### 33 *Re-analysis of studies reporting estimates of person-level treatment effects*

34

35 Eleven studies (including 19 comparisons, due to multiple outcomes in some studies)  
36 reported estimates of person-level treatment effects sufficient to analyze (Appendix Figures 1-14  
37 displays graphs of the person level treatment effect data). Average fixed effect estimates for each  
38 analysis are shown in **Table 4**; random effects estimates were generally similar (Appendix 4). In  
39 8 of the 11 studies (73%) and 14 of the 19 total unique comparisons (74%) we found evidence of  
40 statistically significant HTE for at least one outcome (Table 4). Generally, the magnitude in the  
41 variation of individual patient effects (as seen in the range) was very large compared to the  
42 average effects. Most studies (64%) showed person-level effects that differed qualitatively from  
43  
44  
45  
46  
47  
48  
49  
50  
51  
52  
53  
54  
55  
56  
57  
58  
59  
60

one another. Most of the variation in the observed individual effects was attributable to “true” heterogeneity of person-level effects; 11 of 19 analyses had  $I^2 > 80\%$ .

### ***Re-analysis of studies reporting person-level outcome measurements***

Because some of the 13 studies providing analyzable outcome data had multiple outcomes (or multiple outcomes scales) there were a total of 26 comparisons with analyzable data. (Appendix Figures 15-40 displays graphs of the person level outcome results.) Average fixed effect estimates for each analysis are shown in Table 5; random effects estimates were generally similar (Appendix 5). In eight of the 13 studies (62%) (17 of the 26 unique comparisons [65%]), there was statistically significant person-level HTE for at least one outcome. Among the 26 unique outcome comparisons in eight studies, 17 outcomes (65%) demonstrated statistically significant person-level HTE. Again, the variation in individual effects was often large compared to the average effect. However, given the lower number of participants per study and periods per participant and also different analytic approach, estimates of  $I^2$  were much less precise in these studies.

## **Discussion**

This review documents that multi-person N-of-1 studies rarely examine HTE. Only 8% of 56 multi-person N-of-1 studies described statistical tests examining HTE, but these generally involved comparisons of treatment effects among groups of patients (e.g., based on age or sex) rather than across individuals. Only two studies in the whole of the literature tested for person-level HTE.<sup>9,10</sup> Nevertheless, analyzable person-level results are sometimes reported in multi-person N-of-1 studies, as outcomes or as treatment effects. Our re-analyses of the totality of available data from these studies (n=31) suggested the presence of substantial variation in treatment effects across individuals in most studies. This was evident when considering

1  
2  
3 statistical tests for the variation of treatment effects among patients and also by qualitative  
4 assessment of the magnitude of effect variation. This represents the first broad empirical  
5 examination with re-analysis of person-level HTE across multi-person N-of-1 studies, and it  
6 provides some general support for the *a priori* assumption of individual patient variation in  
7 treatment response that broadly motivates personalized medicine.  
8  
9  
10  
11  
12  
13

14 In contrast to parallel-group studies that establish efficacy in a group of patients with a  
15 common condition, N-of-1 studies establish the effects of an intervention in an individual.<sup>11</sup> In  
16 this respect, N-of-1 studies can be thought of as adjuncts to clinical care, where the goal is to  
17 select the right treatment for a particular patient, rather than as a research tool, where the goal is  
18 to create new generalizable knowledge.<sup>12,13</sup> Indeed, the results of traditional N-of-1 studies may  
19 be generalizable only to the future treatment response of the patient in the trial; it may not apply  
20 to other patients. Nevertheless, using Bayesian meta-analytic techniques, Zucker et al. showed  
21 how the average treatment effect at the population-level can also be estimated from combining  
22 multi-person N-of-1 studies testing similar interventions in similar patients with the same  
23 outcome measures.<sup>14</sup>  
24  
25  
26  
27  
28  
29  
30  
31  
32  
33  
34  
35  
36

37 Herein, we demonstrate yet a new application of N-of-1 studies, to explore person-level  
38 HTE to describe the variation in individual treatment effects. This application has important  
39 research and clinical implications, even when the determinants of HTE remain unidentified. It is  
40 particularly of interest that there was apparent variation in the *degree* of person-level HTE found  
41 across conditions and treatments. Since the degree of variation across individuals sets the upper  
42 bound for the amount of HTE that might be explainable by observable characteristics, such as  
43 clinical or genomic variables, searching for subgroup effects in the absence of person-level HTE  
44 is a futile exercise.<sup>3,15</sup>  
45  
46  
47  
48  
49  
50  
51  
52  
53  
54  
55  
56  
57  
58  
59  
60

1  
2  
3 An interesting example of how person-level HTE can vary across different conditions  
4 comes from the study of Johannessen et al (**Figure 3**).<sup>9</sup> These investigators conducted N-of-1  
5 patient studies comparing cimetidine to placebo for patients presenting with dyspeptic symptoms  
6 and reported person-level effects by subgroups of disease categories. Among 46 trial completers,  
7 cimetidine had a significant effect for most patients (57%) and at the aggregate level. However,  
8 not only was there substantial person-level HTE, but person-level HTE varied across conditions,  
9 being much more pronounced in non-ulcer dyspepsia ( $I^2 = 75\%$ ) compared to peptic ulcer  
10 disease ( $I^2 = 35\%$ ) (Figure 3)— despite the very similar overall effects seen in these two  
11 conditions.  
12  
13  
14  
15  
16  
17  
18  
19  
20  
21  
22  
23

24 Finding variation in person-level response in multi-person N-of-1 studies identifies those  
25 conditions for which N-of-1 studies are likely to be clinically relevant. For condition-treatment  
26 combinations shown to have low person-level HTE, single subject studies are highly unlikely to  
27 be clinically informative, and the average results from trials (i.e., “one-size-fits-all” effects) are  
28 more apt to be applicable to individuals.<sup>16,17</sup> On the other hand, N-of-1 studies may be highly  
29 clinically informative for condition-treatments with a high degree of person-level HTE. These  
30 conditions would also be potentially higher yield for examining predictors of HTE (genomic or  
31 otherwise).  
32  
33  
34  
35  
36  
37  
38  
39  
40  
41

42 Our findings also have implications for clinical practice and formulary design. For  
43 conditions marked by high person-level HTE, even when trials show that one treatment is better  
44 on average than others, having a variety of medication options would be useful to optimize  
45 outcomes across all patients, particularly for chronic conditions such as those studied here where  
46 empiric trials of alternative medications to find the best treatment for an individual might be  
47 feasible. For example, the study by March et al.<sup>18</sup> shows that while patients with osteoarthritis on  
48  
49  
50  
51  
52  
53  
54  
55  
56  
57  
58  
59  
60



1  
2  
3 average had less pain and less stiffness with diclofenac, some patients had improved symptoms  
4 on paracetamol. This person-level heterogeneity of treatment effect may not be detectable in  
5  
6 conventional parallel arm trials employing conventional subgroup analysis.<sup>15</sup>  
7  
8  
9

10 While more studies combining N-of-1 studies are needed to understand the extent of  
11 person-level HTE, future studies need to apply greater methodological rigor to improve the state-  
12 of-the-science on evaluation of individual treatment effects.<sup>19</sup> While the recently published  
13 CONSORT Extension for N-of-1 Trials<sup>20</sup> may help improve reporting, given the relatively small  
14 number of individuals enrolled in each study and the relatively few treatment periods that are  
15 typical in medical studies, a tabulation of all information (possibly electronically available)  
16 appears the most straightforward way to facilitate the clinical interpretation of these studies.  
17 Such reporting allows the inspection of trajectories over time and may reveal patterns that are not  
18 captured by regression models. Complete reporting would also facilitate the development and  
19 evaluation of methods for the analysis of single subject experiments.  
20  
21  
22  
23  
24  
25  
26  
27  
28  
29  
30  
31  
32

33 The limitations of this review reflect, to a large extent, the limitations of the data in  
34 primary studies. Many important disease categories lacked published N-of-1 studies, even  
35 though potentially amenable to this design. We relied on published studies only and our analytic  
36 cohort may be an underestimation of the true prevalence of these studies—particularly for N-of-  
37 1 studies, which may frequently be conducted without the intention of future publication.  
38  
39  
40  
41  
42  
43  
44

45 In addition, our conclusions regarding the ubiquity of HTE in the data we reanalyzed  
46 should be interpreted in the context of several important limitations. First, there were only a  
47 limited number of available studies that reported data sufficient to analyze, and therefore we  
48 present only a very partial picture of the full scope of inter-individual variation in effects across  
49 clinical conditions. Furthermore, among the studies that did have data, only fairly small numbers  
50  
51  
52  
53  
54  
55  
56  
57  
58  
59  
60

1  
2  
3 of patients were observed over a small number of treatment periods and we frequently had to rely  
4  
5 on data summaries provided by the authors (e.g., person-level treatment effects and their  
6  
7 sampling variance); these data limitations precluded the use of more complex models, for  
8  
9 example models that account for period effects or other effects of time on the outcome.<sup>3</sup>  
10  
11

12 Our review has demonstrated that HTE remains almost totally unexplored in multi-person  
13  
14 N-of-1 studies, which are uniquely capable of exploring variations in individual (person-level)  
15  
16 treatment effects. Our re-analysis of the data from these studies represents the first systematic  
17  
18 attempt to obtain empirical support for the *a priori* argument that treatment effects vary across  
19  
20 individual patients, an assumption which underpins all efforts to personalize treatment selection.  
21  
22 In this sample, person-level HTE appears to be fairly common and large enough to be clinically  
23  
24 meaningful; the degree of person-level HTE appears to vary across conditions and outcomes.  
25  
26 Thus, multi-person N-of-1 studies are an under-utilized tool to identify where person-level HTE  
27  
28 may be substantial, and where efforts to find molecular or clinical predictors of response  
29  
30 heterogeneity should be focused. In such conditions, parallel arm studies might yield results that  
31  
32 are over-generalized for patient level decision making.  
33  
34  
35  
36  
37  
38  
39  
40  
41  
42  
43  
44  
45  
46  
47  
48  
49  
50  
51  
52  
53  
54  
55  
56  
57  
58  
59  
60

### **Funding Source**

This work was supported by the National Pharmaceutical Council.

### **Acknowledgement**

We would like to acknowledge Issa Dahabreh, MD, MS, Assistant Professor of Health Services, Policy and Practice, Assistant Professor of Epidemiology, Brown University, for statistical advice.

### **Contributorship statement**

DK, GR made substantial contributions to the conception or design of the work; or the acquisition, analysis, or interpretation of data for the work. DK, GR are responsible for drafting the work or revising it critically for important intellectual content. DK, GR, EB, LL, JS, JC, JL, RD, RK have given final approval of the version to be published. DK, GR have made an agreement to be accountable for all aspects of the work in ensuring that questions related to the accuracy or integrity of any part of the work are appropriately investigated and resolved.

### **Competing interests**

None declared.

### **Data sharing statement**

No additional data are available.

## References

1. Hertz DL, McLeod HL. Use of pharmacogenetics for predicting cancer prognosis and treatment exposure, response and toxicity. *J Hum Genet.* 2013;58(6):346-352.
2. Kitsios GD, Kent DM. Personalised medicine: not just in our genes. *BMJ.* 2012;344:e2161.
3. Senn S. Individual response to treatment: is it a valid assumption? *BMJ.* 2004;329(7472):966-968.
4. Kalow W, Tang BK, Endrenyi L. Hypothesis: comparisons of inter- and intra-individual variations can substitute for twin studies in drug research. *Pharmacogenetics.* 1998;8(4):283-289.
5. Gabler NB, Duan N, Vohra S, Kravitz RL. N-of-1 trials in the medical literature: a systematic review. *Med Care.* 2011;49(8):761-768.
6. Research IoMUCoSfSRoCE. Finding What Works in Health Care: Standards for Systematic Reviews. 2011.
7. Moher D, Liberati A, Tetzlaff J, Altman DG. Preferred reporting items for systematic reviews and meta-analyses: the PRISMA statement. *BMJ.* 2009;339:b2535.
8. WG C. The combination of estimates from different experiments. *Biometrics.* 1954;10:101-129.
9. Johannessen T, Petersen H, Kristensen P, et al. Cimetidine on-demand in dyspepsia. Experience with randomized controlled single-subject trials. *Scand J Gastroenterol.* 1992;27(3):189-195.
10. Pereira JA, Holbrook AM, Dolovich L, et al. Are brand-name and generic warfarin interchangeable? Multiple n-of-1 randomized, crossover trials. *Ann Pharmacother.* 2005;39(7-8):1188-1193.
11. Guyatt GH, Heyting A, Jaeschke R, Keller J, Adachi JD, Roberts RS. N of 1 randomized trials for investigating new drugs. *Control Clin Trials.* 1990;11(2):88-100.
12. Guyatt G, Sackett D, Taylor DW, Chong J, Roberts R, Pugsley S. Determining optimal therapy--randomized trials in individual patients. *N Engl J Med.* 1986;314(14):889-892.
13. Guyatt G, Sackett D, Adachi J, et al. A clinician's guide for conducting randomized trials in individual patients. *CMAJ.* 1988;139(6):497-503.
14. Zucker DR, Ruthazer R, Schmid CH. Individual (N-of-1) trials can be combined to give population comparative treatment effect estimates: methodologic considerations. *J Clin Epidemiol.* 2010;63(12):1312-1323.
15. Dahabreh IJ, Hayward R, Kent DM. Using group data to treat individuals: understanding heterogeneous treatment effects in the age of precision medicine and patient-centred evidence. *Int J Epidemiol.* 2016. [Epub ahead of print]
16. Simon G. Choosing a first-line antidepressant: equal on average does not mean equal for everyone. *JAMA.* 2001;286(23):3003-3004.
17. Simon GE, Psaty BM, Hrachovec JB, Mora M. Principles for evidence-based drug formulary policy. *J Gen Intern Med.* 2005;20(10):964-968.
18. March L, Irwig L, Schwarz J, Simpson J, Chock C, Brooks P. n of 1 trials comparing a non-steroidal anti-inflammatory drug with paracetamol in osteoarthritis. *BMJ.* 1994;309(6961):1041-1045.

- 1
  - 2
  - 3
  - 4
  - 5
  - 6
  - 7
  - 8
  - 9
  - 10
  - 11
  - 12
  - 13
  - 14
  - 15
  - 16
  - 17
  - 18
  - 19
  - 20
  - 21
  - 22
  - 23
  - 24
  - 25
  - 26
  - 27
  - 28
  - 29
  - 30
  - 31
  - 32
  - 33
  - 34
  - 35
  - 36
  - 37
  - 38
  - 39
  - 40
  - 41
  - 42
  - 43
  - 44
  - 45
  - 46
  - 47
  - 48
  - 49
  - 50
  - 51
  - 52
  - 53
  - 54
  - 55
  - 56
  - 57
  - 58
  - 59
  - 60
19. RL K, N D, Panel DMCN-o-G. Design and Implementation of N-of-1 Trials: A User's Guide. AHRQ Publication No. 13(14)-EHC122-EF. Rockville, MD: Agency for Healthcare Research and Quality; 2014.
20. Vohra S, Shamseer L, Sampson M, et al. CONSORT extension for reporting N-of-1 trials (CENT) 2015 Statement. *J Clin Epidemiol.* 2016;76:9-17.

For peer review only

**Table 1. Evidence Map of Multi-person N-of-1 and Repeated Period Crossover Studies**

| <b>Description</b>                    | <b>Multi-person N-of-1 Studies<br/>(n=56)</b> |
|---------------------------------------|-----------------------------------------------|
| <b>Publication Years</b>              | 1979-2014                                     |
| <b>Subjects</b>                       | <b>Total N (median, IQR)</b>                  |
| Enrolled                              | 1974 (21, 10-43)                              |
| Completed                             | 1573 (14, 14-34)                              |
| <b>Intervention &amp; Comparisons</b> |                                               |
| Head-to-head active drugs             | 10                                            |
| Placebo                               | 41                                            |
| Active drug and placebo               | 1                                             |
| <b>Population</b>                     |                                               |
| Pediatric                             | 11                                            |
| Adults                                | 41                                            |
| <b>Major Systems Studied</b>          |                                               |
| Arthritis/Rheumatology                | 10                                            |
| Cardiovascular                        | 3                                             |
| Gastrointestinal                      | 7                                             |
| Hypertension                          | 0                                             |
| Psychiatry                            | 9                                             |
| Neurology                             | 13                                            |
| Respiratory                           | 7                                             |
| Miscellaneous*                        | 7                                             |
| <b>Top 5 Disease Conditions</b>       |                                               |
| ADHD                                  | 6                                             |
| Angina                                | 3                                             |
| Chronic Pain                          | 5                                             |
| GERD                                  | 5                                             |
| Obstructive Airway                    | 6                                             |
| Osteoarthritis                        | 6                                             |

\*Sleep disorders, Allergy, Cancer, Muscular, Vascular (for multi-person N-of-1); Pain, Urology, GYN, Rheumatology, Heme/Onc, Allergy, Dermatology, Drug abuse, Endocrine, Lipids, Nephrology, Ophthalmology, Respiratory (for Repeated Cross-over Studies). ADHD, Attention-deficit hyperactivity disorder; GERD, Gastroesophageal regurgitation disorder; IQR, Interquartile range; n, number of participants

**Table 2. Survey of HTE Assessment in Multi-person N-of-1 Studies**

| <b>HTE Reporting</b>                                            | <b>Multi-person<br/>N-of-1 Studies<br/>(n=56)</b> |
|-----------------------------------------------------------------|---------------------------------------------------|
| Qualitative description                                         | 95%                                               |
| Person-level outcomes                                           | 48%                                               |
| Person-level treatment effects                                  | 29%                                               |
| Statistical analysis of person-level effects<br>(e.g. p-values) | 4%                                                |
| Any statistical test for HTE                                    | 7%*                                               |
| Claims of heterogeneity                                         | 10%                                               |

\* Only 2 studies reported person-level HTE, the remaining 2 studies reported group level effect.

**Table 3. Characteristics of studies reporting person-level data**

| Author, Year                                                     | Disease                                                     | Number enrolled (analyzed) | Intervention               | Comparator                                   | Cross-over periods | Total intervention duration | Outcome measures per period |
|------------------------------------------------------------------|-------------------------------------------------------------|----------------------------|----------------------------|----------------------------------------------|--------------------|-----------------------------|-----------------------------|
| <i>Studies with re-analyzable person-level outcomes</i>          |                                                             |                            |                            |                                              |                    |                             |                             |
| <b>Camfield, 1996</b>                                            | Mental retardation with fragmented sleep                    | 6 (6)                      | Melatonin                  | Placebo                                      | 7                  | 10 wk                       | 14                          |
| <b>Hinderer, 1990</b>                                            | Traumatic spinal cord injury                                | 5 (5)                      | Baclofen                   | Placebo                                      | 3                  | 9 wk                        | 2                           |
| <b>Langer, 1993</b>                                              | Gastroesophageal reflux                                     | 2 (2)                      | Cisapride                  | Placebo                                      | 3                  | 6 wk                        | 5                           |
| <b>Lashner, 1990</b>                                             | Ulcerative colitis                                          | 7 (6)                      | Nicotine                   | Placebo                                      | 4                  | 8 wk                        | 1                           |
| <b>Maier, 1994</b>                                               | Chronic depression                                          | 10 (9)                     | Sulpiride                  | Placebo                                      | 4                  | 28 wk                       | 42                          |
| <b>Mandelcorn, 2004</b>                                          | Brain injury                                                | 4 (4)                      | Ondansetron                | Placebo                                      | 4                  | 5 wk                        | 1                           |
| <b>McQuay, 1994</b>                                              | Neuropathic pain                                            | 19 (19)                    | Dextromethorphan           | Placebo                                      | 5                  | 20 d                        | 1                           |
| <b>Miyazaki, 1995</b>                                            | Unstable angina                                             | 22 (22)                    | Isosorbide dinitrate       | Isosorbide dinitrate: intermittent injection | 3                  | 9 d                         | 6                           |
| <b>Nathan, 2006</b>                                              | Pediatric brain tumor                                       | 12 (7)                     | Ondansetron & metopimazine | Ondansetron & placebo                        | Unclear            | 189 d                       | unclear                     |
| <b>Parodi, 1979</b>                                              | Unstable angina                                             | 12 (12)                    | Verapamil                  | Placebo                                      | 4                  | 10 d                        | unclear                     |
| <b>Parodi, 1986</b>                                              | Unstable angina                                             | 10 (10)                    | Verapamil                  | Propranolol, placebo                         | 8                  | 18 d                        | unclear                     |
| <b>Tison, 2012</b>                                               | Levodopa-induced dyskinesia in Parkinson's disease patients | 10 (10)                    | Simvastatin                | Placebo                                      | 6                  | 96 d                        | 1                           |
| <i>Studies with re-analyzable person-level treatment effects</i> |                                                             |                            |                            |                                              |                    |                             |                             |
| <b>Emmanuel, 2012</b>                                            | Chronic intestinal pseudo-obstruction                       | 7 (4)                      | Prucalopride               | Placebo                                      | 16                 | 48 wk                       | 21                          |
| <b>Haas, 2004</b>                                                | Chronic tension-type and migraine headache                  | 39 (16)                    | Dextroamphetamine          | Equi-stimulatory caffeine                    | 8                  | 20 d                        | 20                          |
| <b>Jaeschke, 1991</b>                                            | Fibromyalgia                                                | 22 (23)                    | Amitriptyline              | Placebo                                      | 6                  | 12 wk                       | 2                           |
| <b>Johannessen, 1992</b>                                         | Dyspepsia                                                   | 68 (46)                    | Cimetidine                 | Placebo                                      | 12                 | 184 d                       | 15                          |
| <b>Mahon, 1996</b>                                               | Irreversible chronic airflow                                | 16 (14)                    | Theophylline               | Placebo                                      | 8                  | 73 d                        | 1                           |



|                                                                    |                                              |         |                                                                 |                                          |    |       |         |
|--------------------------------------------------------------------|----------------------------------------------|---------|-----------------------------------------------------------------|------------------------------------------|----|-------|---------|
|                                                                    | limitation                                   |         |                                                                 |                                          |    |       |         |
| <b>March, 1999</b>                                                 | Osteoarthritis                               | 25 (15) | Diclofenac                                                      | Paracetamol                              | 6  | 12 wk | 14      |
| <b>Patel, 1991</b>                                                 | Nonreversible chronic airflow limitation     | 26 (18) | Ipratropium bromide / theophylline / salbutamol/ beclomethasone | Placebo                                  | 6  | 6 wk  | Unclear |
| <b>Wallace, 1994</b>                                               | Attention deficit hyperactivity disorder     | 11 (7)  | Methylphenidate                                                 | Placebo                                  | 14 | 14 d  | 1       |
| <b>Woodfield, 2005</b>                                             | Skeletal muscle cramps                       | 13      | Quinine                                                         | Placebo                                  | 6  | 14 wk | 2       |
| <b>Zucker, 2006</b>                                                | Fibromyalgia                                 | 58      | Amitriptyline and Placebo                                       | Amitriptyline and fluoxetine combination | 6  | 36 wk | 1       |
| <b><i>Study with both person-level data</i></b>                    |                                              |         |                                                                 |                                          |    |       |         |
| <b>Pereira, 1995</b>                                               | Atrial fibrillation / deep venous thrombosis | 7       | Generic warfarin                                                | Coumadin                                 | 10 | 30 wk | 2       |
| <b><i>Study with insufficiently reported person-level data</i></b> |                                              |         |                                                                 |                                          |    |       |         |
| <b><i>Person-level outcome data</i></b>                            |                                              |         |                                                                 |                                          |    |       |         |
| <b>Denburg, 1994</b>                                               | Systemic lupus erythematosus                 | 10      | Prednisone                                                      | Placebo                                  | 6  | 30 wk | 1       |
| <b>Nikles, 2000</b>                                                | Osteoarthritis                               | 14      | Ibuprofen                                                       | Paracetamol; Placebo                     | 6  | 12 wk | 14      |
| <b>Reitberg, 2002</b>                                              | Allergic rhinitis                            | 36      | Loratadine and chlorpheniramine maleate                         | loratadine with placebo                  | 8  | 32 d  | 4       |
| <b>Sheather-Reid, 1998</b>                                         | Chronic pain                                 | 8       | Ibuprofen / Codeine                                             | Placebo                                  | 6  | 12 wk | 14      |
| <b><i>Person-level treatment effects</i></b>                       |                                              |         |                                                                 |                                          |    |       |         |
| <b>Huber, 2007</b>                                                 | Juvenile idiopathic arthritis                | 6       | Amitriptyline                                                   | Placebo                                  | 6  | 17 wk | 12      |
| <b>Privitera, 1994</b>                                             | Partial seizure                              | 16      | Dezinamide                                                      | Placebo                                  | 6  | 35 wk | 6       |
| <b>Wegman, 2003</b>                                                | Osteoarthritis                               | 13      | Paracetamol                                                     | NSAIDs                                   | 10 | 20 wk | 14      |
| <b>Wegman, 2005</b>                                                | Regular Temazepam users                      | 15      | Temazepam                                                       | Placebo                                  | 10 | 10 wk | 7       |

**Table 4. Analysis results of studies reporting person-level treatment effects**

| Author<br>Year              | Outcome                                                      | Main Effect                                                      |                             | Person-Level Heterogeneity of Treatment Effect |                                                                |                 |
|-----------------------------|--------------------------------------------------------------|------------------------------------------------------------------|-----------------------------|------------------------------------------------|----------------------------------------------------------------|-----------------|
|                             |                                                              | Range of the scales (severity)                                   | Treatment effect (CI)       | P for<br>HTE*                                  | Treatment Effect Range<br>Lower Range (CI)<br>Upper Range (CI) | I-square % (CI) |
| <b>Emmanuel<br/>2012</b>    | Bloating                                                     | 0-4 (0=absent to 4=worst)                                        | -0.344 (-0.619 to -0.069)   | <0.001                                         | -1.1 (-1.37 to -0.83)<br>-0.1 (-0.27 to 0.07)                  | 94 (88 to 97)   |
|                             | Pain                                                         | 0-4 (0=absent to 4=worst)                                        | -0.440 (-0.771 to -0.110)   | <0.001                                         | -0.2 (-0.33 to -0.77)<br>-1.4 (-1.69 to -1.11)                 | 96 (92 to 98)   |
| <b>Haas<br/>2004</b>        | Chronic tension-type<br>headache grade                       | 0-3 (0=none to 3=severe)                                         | 0.772 (0.454 to 1.090)      | <0.001                                         | 0.04 (-0.39 to 0.47)<br>1.9 (1.29 to 2.50)                     | 84 (76 to 90)   |
|                             | Chronic migraine headache<br>grade                           | 0-3 (0=none to 3=severe)                                         | 0.542 (0.354 to 0.731)      | 0.067                                          | 0.2 (-0.41 to 0.81)<br>0.83 (0.24 to 1.42)                     | 37 (0 to 65)    |
| <b>Jaeschke<br/>1991</b>    | 7-point symptom scale                                        | 1-7 (higher scores represent<br>better function)                 | 0.427 (0.210 to 0.645)      | <0.001                                         | -1.02 (-2.82 to 0.77)<br>3.18 (1.89 to 4.46)                   | 85 (79 to 89)   |
|                             | Tender point changes count                                   | Number of tender points                                          | 1.320 (0.404 to 2.236)      | <0.001                                         | -4.33 (-10.8 to 2.14)<br>9.0 (5.36 to 12.63)                   | 72 (57 to 82)   |
| <b>Johannessen<br/>1992</b> | 6-point symptom scale                                        | 0-6 (0=NR to 6=NR)                                               | 0.698 (0.466 to 0.931)      | <0.001                                         | -1.67 (-2.78 to -0.55)<br>3.17 (0.60 to 5.74)                  | 66 (53 to 75)   |
| <b>Mahon<br/>1996</b>       | Dyspnea in likert Scale                                      | 1-7 (1=extremely short of breath<br>to 7=no shortness)           | 0.125 (-0.181 to 0.430)     | <0.001                                         | -0.57 (-1.55 to 0.42)<br>0.89 (0.62 to 1.16)                   | 78 (58 to 88)   |
| <b>March<br/>1999</b>       | Mean pain score on VAS                                       | 5 point Likert scale (0-100mm)                                   | -7.093 (-11.939 to -2.248)  | <0.001                                         | -33.8 (-38.9 to -28.6)<br>4.1 (-17.0 to 25.0)                  | 98 (97 to 98)   |
|                             | Mean stiffness score on VAS                                  | 5 point Likert scale (0-100mm)                                   | -5.992 (-11.280 to -0.704)  | <0.001                                         | -36 (-50.6 to -21.4)<br>10.7 (1.12 to 20.2)                    | 97 (96 to 98)   |
| <b>Patel<br/>1991**</b>     | 4-item symptom questionnaire<br>(All compared to placebo)    | 1-7 (1=extremely short of breath<br>to 7=no shortness of breath) | 0.240 (0.131 to 0.350)      | <0.001                                         | -0.34 (-1.04 to 0.36)<br>3.1 (1.54 to 4.66)                    | 91 (87 to 94)   |
|                             | 4-item symptom questionnaire<br>(use of ipratropium bromide) |                                                                  | 0.675 (0.264 to 1.085)      | <0.001                                         | -0.22 (-0.71 to 0.26)<br>3.1 (1.54 to 4.66)                    | 87 (78 to 92)   |
|                             | 4-item symptom questionnaire<br>(use of salbutamol)          |                                                                  | 0.865 (0.042 to 1.687)      | <0.001                                         | 0.46 (0.27 to 0.65)<br>1.3 (0.93 to 1.67)                      | 94 (NA)         |
|                             | 4-item symptom questionnaire<br>(use of theophylline)        |                                                                  | 0.025 (-0.434 to 0.484)     | 0.172                                          | -0.34 (-1.04 to 0.36)                                          | 30 (0 to 93)    |
| <b>Pereira<br/>1995</b>     | INR (diff)                                                   | Target INR range of 2.0–3.0                                      | 0.027 (-0.155 to 0.209)     | 0.477                                          | -0.28 (-0.97 to 0.41)<br>0.37 (-0.07 to 0.81)                  | 0 (0 to 75)     |
| <b>Wallace<br/>1994</b>     | Conners 15-item rating scale<br>scores                       | 0-3 (NR)                                                         | 0.759 (0.341 to 1.178)      | 0.747                                          | 0.42 (-0.51 to 1.35)<br>1.22 (0.23 to 2.21)                    | 0 (0 to 79)     |
| <b>Woodfield<br/>2005</b>   | Changes in number of cramps                                  | Number – mean difference                                         | -18.823 (-28.527 to -9.120) | <0.001                                         | -77 (-106.0 to -47.9)<br>-2 (-3.96 to -0.04)                   | 92 (87 to 95)   |
|                             | Total days with cramps                                       | days                                                             | -6.181 (-9.798 to -2.563)   | <0.001                                         | -13 (-14.98 to -11.02)<br>-1 (-6.15 to 4.15)                   | 94 (90 to 96)   |
| <b>Zucker<br/>2006</b>      | FIQ                                                          | 0-100 (0=best to 100=worst)                                      | -5.019 (-8.784 to -1.254)   | 0.999                                          | -32.0 (-79.2 to 15.18)<br>0.98 (-16.9 to 18.9)                 | 0 (0 to 37)     |

1  
2  
3  
4  
5  
6  
7  
8  
9  
10  
11  
12  
13  
14  
15  
16  
17  
18  
19  
20  
21  
22  
23  
24  
25  
26  
27  
28  
29  
30  
31  
32  
33  
34  
35  
36  
37  
38  
39  
40  
41  
42  
43  
44  
45  
46  
47

\* The significance of person-level HTE was assessed by Cochran's chi-square-based test  
\*\* One subject had beclomethasone

For peer review only

**Table 5. Studies reporting person-level outcomes**

| Author<br>Year             | Outcome                                          | Definition / Range of the Scales<br>(severity)                                                                                                                    | Main Effect                   |                                              | Person-level Heterogeneity of Treatment Effect                 |                    |
|----------------------------|--------------------------------------------------|-------------------------------------------------------------------------------------------------------------------------------------------------------------------|-------------------------------|----------------------------------------------|----------------------------------------------------------------|--------------------|
|                            |                                                  |                                                                                                                                                                   | Fixed Treatment Effect        | P for<br>Person<br>Treatment<br>Interaction* | Treatment Effect Range<br>Lower Range (CI)<br>Upper Range (CI) | I-square %<br>(CI) |
| <b>Camfield<br/>1996</b>   | Nights without awakening                         | Between 10:00 PM and 7:00 AM<br>per day                                                                                                                           | 0.865 (0.215 to 1.516)        | 0.456                                        | 0.12 (-1.9 to 2.2)<br>2.0 (-0.1 to 4.2)                        | 0 (0 to 79)        |
| <b>Hinderer<br/>1990</b>   | Anxiety                                          | Beck Inventory-A anxiety scale 0-3<br>(0 = never, 3 = almost all the time)                                                                                        | 0.000 (0.000 to 0.000)        | <0.001                                       | -6.38 (-7.96 to -4.80)<br>0.000 (-1.64 to 1.64)                | 91 (81 to 95)      |
| <b>Langer<br/>1993</b>     | Vomiting                                         | Number of episodes                                                                                                                                                | -1.204 (-2.494 to 0.086)      | 0.136                                        | -1.34 (-0.76 to 0.22)<br>0.17 (-0.41 to 0.76)                  | 87 (NA)*           |
| <b>Lashner<br/>1990</b>    | Symptom score: abdominal<br>pain                 | Symptom scores 0-100 (0 = best,<br>100 = worst)                                                                                                                   | -3.615 (-16.982 to 9.751)     | 0.007                                        | -35.0 (-65.8 to -4.2)<br>15.0 (-28.6 to 58.6)                  | 37 (0 to 73)       |
|                            | Symptom score: bowel<br>movements/day            |                                                                                                                                                                   | -0.538 (-1.215 to 0.138)      | 0.001                                        | -3.0 (-4.9 to -1.0)<br>1.0 (-0.4 to 2.4)                       | 56.6 (0 to 81)     |
|                            | Symptom score: consistency<br>of bowel movements |                                                                                                                                                                   | 7.000 (-7.551 to 21.551)      | 0.013                                        | -25.5 (-60.1 to 9.1)<br>33.0 (-1.6 to 67.6)                    | 28 (0 to 69)       |
|                            | Symptom score:<br>hematochezia                   |                                                                                                                                                                   | 2.308 (-17.210 to<br>21.826)  | 0.003                                        | -38.0 (-80.8 to 4.8)<br>47.5 (4.7 to 90.3)                     | 47 (0 to 78)       |
|                            | Symptom score: general<br>sense of well-being    |                                                                                                                                                                   | -6.538 (-25.352 to<br>12.275) | 0.008                                        | -43.0 (-104.6 to 18.6)<br>35.0 (-8.6 to 78.6)                  | 35 (0 to 73)       |
| <b>Maier<br/>1994</b>      | SCL-90 subscales:<br>Depressed mood              | Self-rating inventory to measure the<br>effects of drug                                                                                                           | -3.536 (-6.718 to -0.354)     | <0.001                                       | -17.8 (-25.5 to -10.1)<br>2.74 (-4.9 to 10.4)                  | 58 (12 to 80)      |
|                            | SCL-90 subscales: Anxiety                        |                                                                                                                                                                   | -3.753 (-6.582 to -0.924)     | <0.001                                       | -17.4 (-23.8 to -10.9)<br>2.5 (-3.9 to 8.9)                    | 66 (30 to 83)      |
|                            | SCL-90 subscales:<br>Somatization                |                                                                                                                                                                   | -1.419 (-4.316 to 1.478)      | 0.869                                        | -6.0 (-16.0 to 4.0)<br>2.7 (-7.3 to 12.7)                      | 0 (0 to 65)        |
| <b>Mandelcorn<br/>2004</b> | Self-Assessment score                            | 0–5 (0 = worst, 5 = best)                                                                                                                                         | -2.052 (-8.865 to 4.761)      | 0.05                                         | -7.7 (-18.9 to 3.6)<br>4.9 (-6.3 to 16.2)                      | 0 (0 to 85)        |
|                            | Lower extremity ataxia                           | Fugl-Meyer: 3-point (0 cannot be<br>performed to 2 can be fully<br>performed)<br>AMTI forceplate®: NR                                                             | 12.494 (-3.155 to<br>28.142)  | 0.025                                        | -6.42 (-35.09 to 22.26)<br>36.76 (8.09 to 65.43)               | 35 (0 to 77)       |
|                            | Truncal ataxia                                   | <i>Berg Balance Scale® 0–56, with a<br/>higher score indicating a better<br/>performance</i>                                                                      | 1.196 (-2.866 to 5.257)       | 0.690                                        | -0.52 (-8.88 to 7.83)<br>2.20 (-6.16 to 10.55)                 | 0 (0 to 85)        |
|                            | Upper extremity ataxia                           | Purdue Pegboard Test®: pegs<br>inserted into the board with each<br>hand in 30 sec<br><i>Minnesota Placing Test®: reach<br/>out, grasp, and place blocks in a</i> | -0.498 (-3.546 to 2.550)      | 0.382                                        | -3.68 (-10.48 to 3.13)<br>1.42 (-5.39 to 8.23)                 | 0 (0 to 85)        |

| Author Year   | Outcome                                        | Definition / Range of the Scales (severity)                                                         | Main Effect               |                                     | Person-level Heterogeneity of Treatment Effect           |                 |
|---------------|------------------------------------------------|-----------------------------------------------------------------------------------------------------|---------------------------|-------------------------------------|----------------------------------------------------------|-----------------|
|               |                                                |                                                                                                     | Fixed Treatment Effect    | P for Person Treatment Interaction* | Treatment Effect Range Lower Range (CI) Upper Range (CI) | I-square % (CI) |
|               |                                                | <i>specific order</i>                                                                               |                           |                                     |                                                          |                 |
| McQuay 1994   | VAS Pain Intensity                             | 0-100 (0 = no pain, 100 = worst possible pain)                                                      | -1.094 (-5.572 to 3.383)  | 0.004                               | -8.0 (-18.7 to 2.6)<br>10.1 (-19.0 to 27.0)              | 0 (0 to 49)     |
|               | VAS Relief Intensity                           | 0-100 (0 = no relief, 100 = complete pain relief)                                                   | -3.913 (-11.729 to 3.903) | 0.038                               | -28.4 (-45.9 to -10.8)<br>5.15 (-12.4 to 22.7)           | 0 (0 to 49)     |
| Miyazaki 1995 | Incidence of angina                            | Either ST-segment elevation or depression at rest                                                   | 0.496 (-0.206 to 1.199)   | 0.125                               | -16.19 (-6455 to 6422)<br>17.11 (-6422 to 6456)          | 0 (0 to 60)     |
| Nathan 2006   | Emetic episodes per day                        | complete response (0 episodes/day), major response (1–2 episodes/day), or failure (>2 episodes/day) | -0.095 (-0.514 to 0.325)  | 0.001                               | -16.5 (-4577 to 4523)<br>2.08 (0.61 to 3.55)             | 59 (6 to 82)    |
| Parodi 1979   | Ischemic attacks                               | ST elevation or depression (details NR)                                                             | -1.544 (-1.838 to -1.251) | 0.007                               | -16.21 (-2668 to 2636)<br>-0.34 (-0.96 to 0.28)          | 48 (0 to 73)    |
| Parodi 1986   | Asymptomatic ST elevation (After verapamil)    | 0.1 mV of ST-segment elevation measured 20 ms after the J point                                     | -1.637 (-1.994 to -1.279) | 0.110                               | -2.37 (-2.97 to -1.78)<br>-1.30 (-1.74 to -0.86)         | 6 (0 to 65)     |
|               | Asymptomatic ST depression (After verapamil)   | More than 0.2 mV of ST-segment depression measured 80 ms after the J point                          | -1.083 (-1.903 to -0.262) | 0.401                               | -17.42 (-10324 to 10289)<br>-0.90 (-1.81 to 0.00)        | 0 (0 to 62)     |
|               | Symptomatic ST elevation (After verapamil)     |                                                                                                     | -1.580 (-1.906 to -1.254) | <0.001                              | -15.40 (-3085 to -3054)<br>-1.45 (-1.94 to -0.97)        | 0 (0 to 62)     |
|               | Symptomatic ST Depression (After verapamil)    |                                                                                                     | -0.990 (-1.411 to -0.569) | 0.002                               | -2.53 (-4.25 to -0.80)<br>-0.52 (-2.09 to 1.06)          | 6 (0 to 64)     |
|               | Asymptomatic ST elevation (After propranolol)  |                                                                                                     | 0.100 (-0.086 to 0.286)   | 0.006                               | -0.77 (-1.72 to 0.18)<br>1.38 (0.64 to 1.65)             | 62 (25 to 81)   |
|               | Asymptomatic ST depression (After propranolol) |                                                                                                     | 0.339 (-0.168 to 0.845)   | 0.964                               | -18.3 (-21040 to 21004)<br>0.83 (0.01 to 1.64)           | 0 (0 to 62)     |
|               | Symptomatic ST elevation (After propranolol)   |                                                                                                     | -0.002 (-0.177 to 0.173)  | 0.063                               | -14.9 (-3159 to 3129)<br>0.68 (0.34 to 1.02)             | 46 (0 to 74)    |
| Pereira 1995  | INR                                            | Target INR range of 2.0–3.0                                                                         | -0.126 (-0.312 to 0.060)  | 0.433                               | -0.42 (-1.27 to 0.08)<br>0.16 (-0.28 to 0.59)            | 0 (0 to 71)     |
|               |                                                |                                                                                                     |                           |                                     |                                                          |                 |
| Tison 2012    | Troublesome dyskinesia                         | 7 points scale (1 = extremely uncomfortable, 7 = not at all uncomfortable)                          | 0.167 (-0.449 to 0.783)   | 0.593                               | -0.67 (-2.68 to 1.35)<br>1.83 (-0.18 to 3.85)            | 0 (0 to 62)     |

\* The significance of person-level HTE was assessed by a likelihood ratio test comparing the two models – model with common treatment effect and model with treatment-by-participant interactions

## Figure Legend

**Figure 1:** The Figure provides a schematic description of: person-level outcomes (outcomes for each patient during each treatment period); person-level effects (contrasts of the outcomes for each patient in one treatment condition *versus* another); and person-HTE (between patient contrasts of effects).

**Figure 2.** Study Flow Diagram represents the flow of eligible studies included in this review

**Figure 3.** Person-level variation across different disease conditions. This figure depicts the results of 46 different N-of-1 trials of cimetidine as reported by Johannesssen et al <sup>9</sup>. The effect of cimetidine versus placebo was measured in each subject across 12 cross-over periods over the span of 184 days. While cimetidine had a similar average effect regardless of the index condition, there was far greater consistency of effect in patients with peptic ulcer disease and much more variation in effect among patients with non-ulcer dyspepsia.

Figure 1. Person-level outcomes, person-level effects and person-level HTE

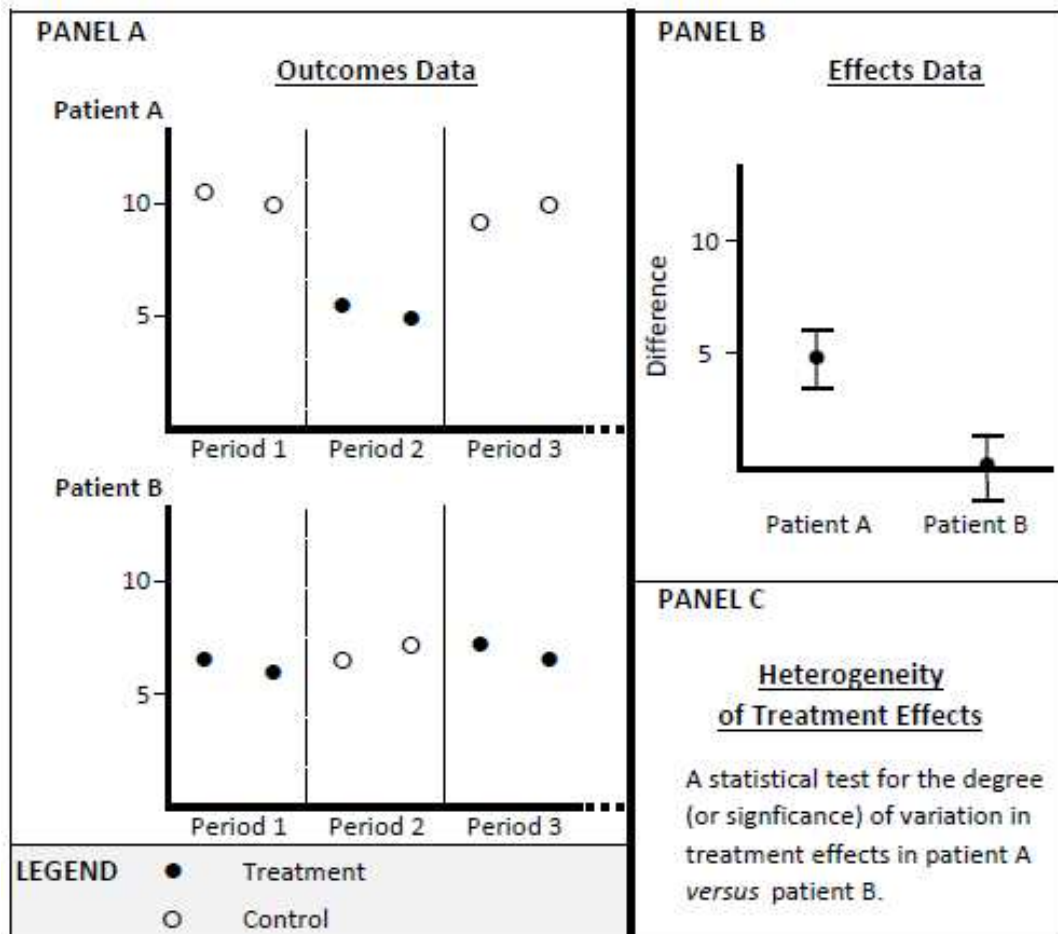

**Figure 2. Study Flow Diagram**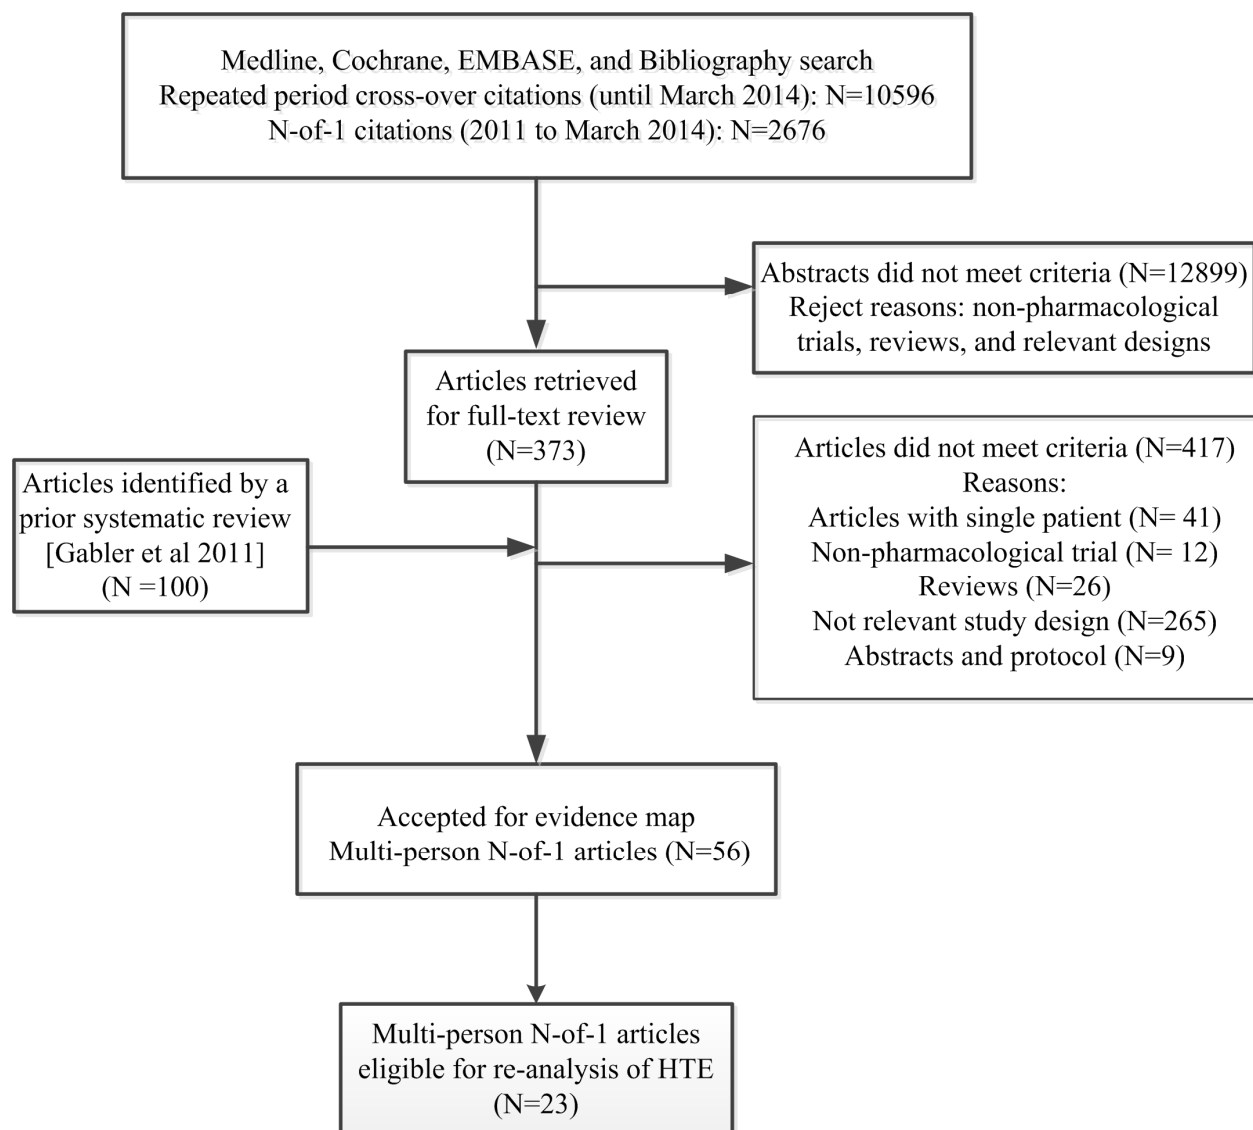



Figure 3. Person-level variation across different disease conditions

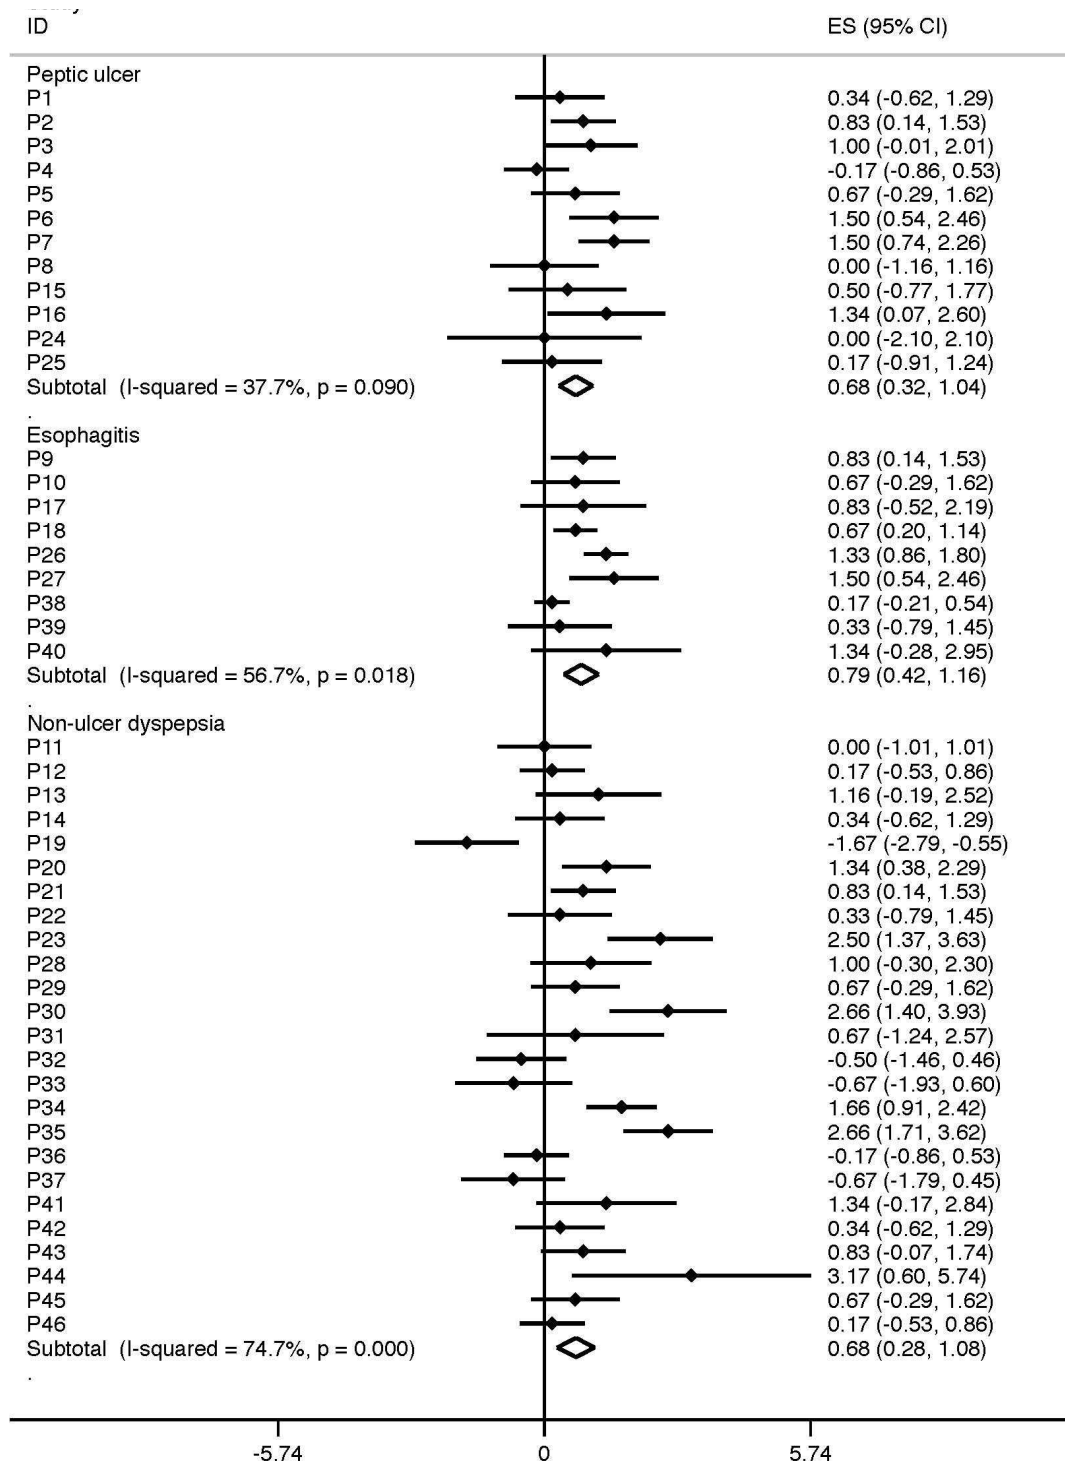

## Appendix Materials

**Appendix Table 1: N-of-1 Trial Searches**

|     |                                                                                        |
|-----|----------------------------------------------------------------------------------------|
| 1.  | randomized controlled trial.pt.                                                        |
| 2.  | controlled clinical trial.pt.                                                          |
| 3.  | randomized controlled trials/                                                          |
| 4.  | Double-blind Method/                                                                   |
| 5.  | Single-Blind Method/                                                                   |
| 6.  | clinical trial.pt.                                                                     |
| 7.  | Clinical Trials.mp. or exp Clinical Trials/                                            |
| 8.  | random\$.tw.                                                                           |
| 9.  | trial\$.tw.                                                                            |
| 10. | Cross-Over Studies/                                                                    |
| 11. | or/1-10                                                                                |
| 12. | n-of-1.af.                                                                             |
| 13. | 11 and 12                                                                              |
| 14. | (single-subject or single-patient or single case or single-case or within-patient).af. |
| 15. | ((single adj1 patient) or (single adj1 subject)).tw.                                   |
| 16. | 14 or 15                                                                               |
| 17. | 11 and 16                                                                              |
| 18. | multi-crossover.mp.                                                                    |
| 19. | 13 or 17 or 18                                                                         |
| 20. | limit 19 to yr="2010 - 2014"                                                           |

**Appendix Table 2: Repeated Period Crossover Trials**

|     |                                                                |
|-----|----------------------------------------------------------------|
| 1.  | (repeat\$ or rotat\$).af.                                      |
| 2.  | ((three or four or five or six) and period).tw.                |
| 3.  | (multi- or multiple).tw.                                       |
| 4.  | (three-period or four-period or five-period or six-period).tw. |
| 5.  | (three-way or four-way or five-way or six-way).tw.             |
| 6.  | or/1-5                                                         |
| 7.  | Cross-Over Studies/ or (cross-over or crossover).af.           |
| 8.  | 6 and 7                                                        |
| 9.  | randomized controlled trial.pt.                                |
| 10. | controlled clinical trial.pt.                                  |
| 11. | randomized controlled trials/                                  |
| 12. | Double-blind Method/                                           |
| 13. | Single-Blind Method/                                           |
| 14. | clinical trial.pt.                                             |
| 15. | Clinical Trials.mp. or exp Clinical Trials/                    |
| 16. | random\$.tw.                                                   |
| 17. | trial\$.tw.                                                    |
| 18. | or/9-17                                                        |
| 19. | 8 and 18                                                       |
| 20. | (dt or de or tu).fs.                                           |
| 21. | 19 and 20                                                      |
| 22. | 7 and 20                                                       |
| 23. | “Reproducibility of Results”/                                  |
| 24. | 16 and 22                                                      |
| 25. | limit 22 to english language                                   |
| 26. | 9 or 10 or 11 or 14 or 15 or 16                                |
| 27. | 7 or 23                                                        |
| 28. | 20 and 26 and 27                                               |
| 29. | random.af.                                                     |
| 30. | 9 or 10 or 11 or 14 or 15 or 29                                |
| 31. | ae.fs.                                                         |
| 32. | 20 or 31                                                       |
| 33. | 27 and 30 and 32                                               |
| 34. | limit 33 to (english language and humans)                      |
| 35. | periods.af.                                                    |
| 36. | 6 or 35                                                        |

|     |                     |
|-----|---------------------|
| 37. | 33 and 36           |
| 38. | Animals/ not human/ |
| 39. | 37 not 38           |

For peer review only

**Appendix Table 3: Reference List (Included N-of-1 Studies)**

|     |                                                                                                                                                                                                                                                                                                                                                                                         |
|-----|-----------------------------------------------------------------------------------------------------------------------------------------------------------------------------------------------------------------------------------------------------------------------------------------------------------------------------------------------------------------------------------------|
| 1.  | Nikles CJ, McKinlay L, Mitchell GK, Carmont SA, Senior HE, Waugh MC et al. Aggregated n-of-1 trials of central nervous system stimulants versus placebo for paediatric traumatic brain injury--a pilot study. <i>Trials [Electronic Resource]</i> 2014; 15:54.                                                                                                                          |
| 2.  | Tison F, Negre-Pages L, Meissner WG, Dupouy S, Li Q, Thiolat ML et al. Simvastatin decreases levodopa-induced dyskinesia in monkeys, but not in a randomized, placebo-controlled, multiple cross-over ("n-of-1") exploratory trial of simvastatin against levodopa-induced dyskinesia in Parkinson's disease patients. <i>Parkinsonism &amp; Related Disorders</i> 2013; 19(4):416-421. |
| 3.  | Rascol O, Ferreira J, Negre-Pages L, Perez-Lloret S, Lacomblez L, Galitzky M et al. A proof-of-concept, randomized, placebo-controlled, multiple cross-overs (n-of-1) study of naftazone in Parkinson's disease. <i>Fundamental &amp; Clinical Pharmacology</i> 2012; 26(4):557-564.                                                                                                    |
| 4.  | Emmanuel AV, Kamm MA, Roy AJ, Kerstens R, Vandeplassche L. Randomised clinical trial: the efficacy of prucalopride in patients with chronic intestinal pseudo-obstruction--a double-blind, placebo-controlled, cross-over, multiple n = 1 study. <i>Alimentary Pharmacology &amp; Therapeutics</i> 2012; 35(1):48-55.                                                                   |
| 5.  | Yelland MJ, Poulos CJ, Pillans PI, Bashford GM, Nikles CJ, Sturtevant JM et al. N-of-1 randomized trials to assess the efficacy of gabapentin for chronic neuropathic pain. <i>Pain Medicine</i> 2009; 10(4):754-761.                                                                                                                                                                   |
| 6.  | Nonoyama ML, Brooks D, Guyatt GH, Goldstein RS. Effect of oxygen on health quality of life in patients with chronic obstructive pulmonary disease with transient exertional hypoxemia. <i>American Journal of Respiratory &amp; Critical Care Medicine</i> 2007; 176(4):343-349.                                                                                                        |
| 7.  | Huber AM, Tomlinson GA, Koren G, Feldman BM. Amitriptyline to relieve pain in juvenile idiopathic arthritis: a pilot study using Bayesian metaanalysis of multiple N-of-1 clinical trials. <i>Journal of Rheumatology</i> 2007; 34(5):1125-1132.                                                                                                                                        |
| 8.  | Yelland MJ, Nikles CJ, McNair N, Del Mar CB, Schluter PJ, Brown RM. Celecoxib compared with sustained-release paracetamol for osteoarthritis: a series of n-of-1 trials. <i>Rheumatology</i> 2007; 46(1):135-140.                                                                                                                                                                       |
| 9.  | Zucker DR, Ruthazer R, Schmid CH, Feuer JM, Fischer PA, Kieval RI et al. Lessons learned combining N-of-1 trials to assess fibromyalgia therapies. <i>Journal of Rheumatology</i> 2006; 33(10):2069-2077.                                                                                                                                                                               |
| 10. | Nikles CJ, Mitchell GK, Del Mar CB, Clavarino A, McNair N. An n-of-1 trial service in clinical practice: testing the effectiveness of stimulants for attention-deficit/hyperactivity disorder. <i>Pediatrics</i> 2006; 117(6):2040-2046.                                                                                                                                                |
| 11. | Nathan PC, Tomlinson G, Dupuis LL, Greenberg ML, Ota S, Bartels U et al. A pilot study of ondansetron plus metopimazine vs. ondansetron monotherapy in children receiving highly emetogenic chemotherapy: a Bayesian randomized serial N-of-1 trials design. <i>Supportive Care in Cancer</i> 2006; 14(3):268-276.                                                                      |
| 12. | Pereira JA, Holbrook AM, Dolovich L, Goldsmith C, Thabane L, Douketis JD et al. Are brand-name and generic warfarin interchangeable? Multiple n-of-1 randomized, crossover trials. <i>Annals of Pharmacotherapy</i> 2005; 39(7-8):1188-1193.                                                                                                                                            |
| 13. | Woodfield R, Goodyear-Smith F, Arroll B. N-of-1 trials of quinine efficacy in skeletal muscle cramps of the leg. <i>British Journal of General Practice</i> 2005; 55(512):181-185.                                                                                                                                                                                                      |
| 14. | Wegman AC, van der Windt DA, Bongers M, Twisk JW, Stalman WA, de Vries TP. Efficacy of temazepam in frequent users: a series of N-of-1 trials. <i>Family Practice</i> 2005; 22(2):152-159.                                                                                                                                                                                              |
| 15. | Nikles CJ, Yelland M, Glasziou PP, Del MC. Do individualized medication effectiveness tests (n-of-1 trials) change clinical decisions about which drugs to use for osteoarthritis and chronic pain?. [Review] [19 refs]. <i>American Journal of Therapeutics</i> 2005; 12(1):92-97.                                                                                                     |
| 16. | Smith BJ, Appleton SL, Veale AJ, McElroy HJ, Veljkovic D, Saccoia L. Eformoterol n-of-1 trials in chronic obstructive pulmonary disease poorly reversible to salbutamol. <i>Chronic Respiratory Disease</i> 2004; 1(2):63-69.                                                                                                                                                           |

|     |                                                                                                                                                                                                                                                                 |
|-----|-----------------------------------------------------------------------------------------------------------------------------------------------------------------------------------------------------------------------------------------------------------------|
| 17. | Haas DC, Sheehe PR. Dextroamphetamine pilot crossover trials and n of 1 trials in patients with chronic tension-type and migraine headache. <i>Headache</i> 2004; 44(10):1029-1037.                                                                             |
| 18. | Mandelcorn J, Cullen NK, Bayley MT. A preliminary study of the efficacy of ondansetron in the treatment of ataxia, poor balance and incoordination from brain injury. <i>Brain Injury</i> 2004; 18(10):1025-1039.                                               |
| 19. | Pope JE, Prashker M, Anderson J. The efficacy and cost effectiveness of N of 1 studies with diclofenac compared to standard treatment with nonsteroidal antiinflammatory drugs in osteoarthritis. <i>Journal of Rheumatology</i> 2004; 31(1):140-149.           |
| 20. | Wegman AC, van der Windt DA, de HM, Deville WL, Fo CT, de Vries TP. Switching from NSAIDs to paracetamol: a series of n of 1 trials for individual patients with osteoarthritis. <i>Annals of the Rheumatic Diseases</i> 2003; 62(12):1156-1161.                |
| 21. | Reitberg DP, Del RE, Weiss SL, Rebell G, Zaias N. Single-patient drug trial methodology for allergic rhinitis. <i>Annals of Pharmacotherapy</i> 2002; 36(9):1366-1374.                                                                                          |
| 22. | Linday LA, Tsiouris JA, Cohen IL, Shindlecker R, DeCresce R. Famotidine treatment of children with autistic spectrum disorders: pilot research using single subject research design. <i>Journal of Neural Transmission</i> 2001; 108(5):593-611.                |
| 23. | Duggan CM, Mitchell G, Nikles CJ, Glasziou PP, Del Mar CB, Clavarino A. Managing ADHD in general practice. N of 1 trials can help! <i>Australian Family Physician</i> 2000; 29(12):1205-1209.                                                                   |
| 24. | Nikles CJ, Glasziou PP, Del Mar CB, Duggan CM, Clavarino A, Yelland MJ. Preliminary experiences with a single-patient trials service in general practice. <i>Medical Journal of Australia</i> 2000; 173(2):100-103.                                             |
| 25. | Mahon JL, Laupacis A, Hodder RV, McKim DA, Paterson NA, Wood TE et al. Theophylline for irreversible chronic airflow limitation: a randomized study comparing n of 1 trials to standard practice. <i>Chest</i> 1999; 115(1):38-48.                              |
| 26. | Bollert FG, Paton JY, Marshall TG, Calvert J, Greening AP, Innes JA. Recombinant DNase in cystic fibrosis: a protocol for targeted introduction through n-of-1 trials. <i>Scottish Cystic Fibrosis Group. European Respiratory Journal</i> 1999; 13(1):107-113. |
| 27. | Kent MA, Camfield CS, Camfield PR. Double-blind methylphenidate trials: practical, useful, and highly endorsed by families. <i>Archives of Pediatrics &amp; Adolescent Medicine</i> 1999; 153(12):1292-1296.                                                    |
| 28. | Webb S, Tansey P, Brown H, Jackson A, Bilton D. Placebo-controlled n-of-1 trials in cystic fibrosis. <i>European Respiratory Journal</i> 1999; 14(4):993.                                                                                                       |
| 29. | Haines DR, Gaines SP. N of 1 randomised controlled trials of oral ketamine in patients with chronic pain. <i>Pain</i> 1999; 83(2):283-287.                                                                                                                      |
| 30. | Sheather-Reid RB, Cohen M. Efficacy of analgesics in chronic pain: a series of N-of-1 studies. <i>Journal of Pain &amp; Symptom Management</i> 1998; 15(4):244-252.                                                                                             |
| 31. | Camfield P, Gordon K, Dooley J, Camfield C. Melatonin appears ineffective in children with intellectual deficits and fragmented sleep: six "N of 1" trials. <i>Journal of Child Neurology</i> 1996; 11(4):341-343.                                              |
| 32. | Mahon J, Laupacis A, Donner A, Wood T. Randomised study of n of 1 trials versus standard practice.[Erratum appears in <i>BMJ</i> 1996 Jun 1;312(7043):1392]. <i>BMJ</i> 1996; 312(7038):1069-1074.                                                              |
| 33. | Maier W, Benkert O. Treatment of chronic depression with sulpiride: evidence of efficacy in placebo-controlled single case studies. <i>Psychopharmacology</i> 1994; 115(4):495-501.                                                                             |
| 34. | McQuay HJ, Carroll D, Jadad AR, Glynn CJ, Jack T, Moore RA et al. Dextromethorphan for the treatment of neuropathic pain: a double-blind randomised controlled crossover trial with integral n-of-1 design. <i>Pain</i> 1994; 59(1):127-133.                    |
| 35. | March L, Irwig L, Schwarz J, Simpson J, Chock C, Brooks P. n of 1 trials comparing a non-steroidal anti-inflammatory drug with paracetamol in osteoarthritis. <i>BMJ</i> 1045; 309(6961):1041-1045.                                                             |
| 36. | Denburg SD, Carbotte RM, Denburg JA. Corticosteroids and neuropsychological functioning in                                                                                                                                                                      |

|     |                                                                                                                                                                                                                                                                                                             |
|-----|-------------------------------------------------------------------------------------------------------------------------------------------------------------------------------------------------------------------------------------------------------------------------------------------------------------|
|     | patients with systemic lupus erythematosus. <i>Arthritis &amp; Rheumatism</i> 1994; 37(9):1311-1320.                                                                                                                                                                                                        |
| 37. | Privitera MD, Treiman DM, Pledger GW, Sahlroot JT, Handforth A, Linde MS et al. Dezinamide for partial seizures: results of an n-of-1 design trial. <i>Neurology</i> 1994; 44(8):1453-1458.                                                                                                                 |
| 38. | Langer JC, Winthrop AL, Issenman RM. The single-subject randomized trial. A useful clinical tool for assessing therapeutic efficacy in pediatric practice. <i>Clinical Pediatrics</i> 1993; 32(11):654-657.                                                                                                 |
| 39. | Molloy DW, Guyatt GH, Standish T, Willan A, McIlroy W, D'Souza J et al. Effect of a new nootropic agent, CGS 5649B, on cognition, function, and behavior in dementia. <i>Journal of General Internal Medicine</i> 1993; 8(8):444-447.                                                                       |
| 40. | Johannessen T, Petersen H, Kristensen P, Fosstvedt D, Kleveland PM, Dybdahl J et al. Cimetidine on-demand in dyspepsia. Experience with randomized controlled single-subject trials. <i>Scandinavian Journal of Gastroenterology</i> 1992; 27(3):189-195.                                                   |
| 41. | Johannessen T, Kristensen P, Petersen H, Fosstvedt D, Loge I, Kleveland PM et al. The symptomatic effect of 1-day treatment periods with cimetidine in dyspepsia. Combined results from randomized, controlled, single-subject trials. <i>Scandinavian Journal of Gastroenterology</i> 1991; 26(9):974-980. |
| 42. | Patel A, Jaeschke R, Guyatt GH, Keller JL, Newhouse MT. Clinical usefulness of n-of-1 randomized controlled trials in patients with nonreversible chronic airflow limitation. <i>American Review of Respiratory Disease</i> 1991; 144(4):962-964.                                                           |
| 43. | Larsen S, Farup P, Flaten O, Osnes M. The multi-crossover model for classifying patients as responders to a given treatment. <i>Scandinavian Journal of Gastroenterology</i> 1991; 26(7):763-770.                                                                                                           |
| 44. | Jaeschke R, Adachi J, Guyatt G, Keller J, Wong B. Clinical usefulness of amitriptyline in fibromyalgia: the results of 23 N-of-1 randomized controlled trials. <i>Journal of Rheumatology</i> 1991; 18(3):447-451.                                                                                          |
| 45. | Hinderer SR. The supraspinal anxiolytic effect of baclofen for spasticity reduction. <i>American Journal of Physical Medicine &amp; Rehabilitation</i> 1990; 69(5):254-258.                                                                                                                                 |
| 46. | Lashner BA, Hanauer SB, Silverstein MD. Testing nicotine gum for ulcerative colitis patients. Experience with single-patient trials. <i>Digestive Diseases &amp; Sciences</i> 1990; 35(7):827-832.                                                                                                          |
| 47. | McBride MC. An individual double-blind crossover trial for assessing methylphenidate response in children with attention deficit disorder. <i>Journal of Pediatrics</i> 1988; 113(1:Pt 1):t-45.                                                                                                             |
| 48. | Menard J, Serrurier D, Bautier P, Plouin PF, Corvol P. Crossover design to test antihypertensive drugs with self-recorded blood pressure. <i>Hypertension</i> 1988; 11(2):153-159.                                                                                                                          |
| 49. | Ullmann RK, Sleator EK. Responders, nonresponders, and placebo responders among children with attention deficit disorder. Importance of a blinded placebo evaluation. <i>Clinical Pediatrics</i> 1986; 25(12):594-599.                                                                                      |
| 50. | Wolfe B, Del RE, Weiss SL, Mendelson A, Elbaga TA, Huser FJ et al. Validation of a single-patient drug trial methodology for personalized management of gastroesophageal reflux disease. <i>J Manag Care Pharm</i> 2002; 8(6):459-468.                                                                      |
| 51. | Brookes ST, Biddle L, Paterson C, Woolhead G, Dieppe P. "Me's me and you's you": Exploring patients' perspectives of single patient (n-of-1) trials in the UK. <i>Trials</i> 2007; 8:10.                                                                                                                    |
| 52. | Wallace AE, Kofoed LL. Statistical Analysis of Single Case Studies in the Clinical Setting: The Example of Methylphenidate Trials in Children with Attention-Deficit Hyperactivity Disorder. <i>Journal of Child and Adolescent Psychopharmacology</i> 1994; 4(3):141-150.                                  |

**Appendix Table 4: Reference List (Included Repeated Period Crossover Studies)**

|     |                                                                                                                                                                                                                                                                                                                                                                                       |
|-----|---------------------------------------------------------------------------------------------------------------------------------------------------------------------------------------------------------------------------------------------------------------------------------------------------------------------------------------------------------------------------------------|
| 1.  | Seeburger JL, Cady RK, Winner P, MacGregor A, Valade D, Ge Y et al. Rizatriptan for treatment of acute migraine in patients taking topiramate for migraine prophylaxis. <i>Headache</i> 2012; 52(1):57-67.                                                                                                                                                                            |
| 2.  | Fallon M, Reale C, Davies A, Lux AE, Kumar K, Stachowiak A et al. Efficacy and safety of fentanyl pectin nasal spray compared with immediate-release morphine sulfate tablets in the treatment of breakthrough cancer pain: a multicenter, randomized, controlled, double-blind, double-dummy multiple-crossover study. <i>The Journal of Supportive Oncology</i> 2011; 9(6):224-231. |
| 3.  | Allais G, Bussone G, D'Andrea G, Moschiano F, d'Onofrio F, Valguarnera F et al. Almotriptan 12.5 mg in menstrually related migraine: a randomized, double-blind, placebo-controlled study. <i>Cephalalgia</i> 2011; 31(2):144-151.                                                                                                                                                    |
| 4.  | Farrar JT, Messina J, Xie F, Portenoy RK. A novel 12-week study, with three randomized, double-blind placebo-controlled periods to evaluate fentanyl buccal tablets for the relief of breakthrough pain in opioid-tolerant patients with noncancer-related chronic pain. <i>Pain Medicine</i> 2010; 11(9):1313-1327.                                                                  |
| 5.  | Stocchi F, Hersh BP, Scott BL, Nausieda PA, Giorgi L, Ease-PD Monotherapy Study Investigators. Ropinirole 24-hour prolonged release and ropinirole immediate release in early Parkinson's disease: a randomized, double-blind, non-inferiority crossover study. <i>Current Medical Research &amp; Opinion</i> 2008; 24(10):2883-2895.                                                 |
| 6.  | Incrocci L, Slob AK, Hop WC. Tadalafil (Cialis) and erectile dysfunction after radiotherapy for prostate cancer: an open-label extension of a blinded trial. <i>Urology</i> 2007; 70(6):1190-1193.                                                                                                                                                                                    |
| 7.  | Danielsson P, Janson A, Norgren S, Marcus C. Impact sibutramine therapy in children with hypothalamic obesity or obesity with aggravating syndromes. <i>Journal of Clinical Endocrinology &amp; Metabolism</i> 2007; 92(11):4101-4106.                                                                                                                                                |
| 8.  | Lu M, Malladi V, Agha A, Abudayyeh S, Han C, Siepmann N et al. Failures in a proton pump inhibitor therapeutic substitution program: lessons learned. <i>Digestive Diseases &amp; Sciences</i> 2007; 52(10):2813-2820.                                                                                                                                                                |
| 9.  | Horiguchi T, Hayashi N, Ohira D, Torigoe H, Ito T, Hirose M et al. Usefulness of HFA-BDP for adult patients with bronchial asthma: randomized crossover study with fluticasone. <i>Journal of Asthma</i> 2006; 43(7):509-512.                                                                                                                                                         |
| 10. | Lauschke A, Teichgraber UK, Frei U, Eckardt KU. 'Low-dose' dopamine worsens renal perfusion in patients with acute renal failure. <i>Kidney International</i> 2006; 69(9):1669-1674.                                                                                                                                                                                                  |
| 11. | Carpentier PJ, de Jong CA, Dijkstra BA, Verbrugge CA, Krabbe PF. A controlled trial of methylphenidate in adults with attention deficit/hyperactivity disorder and substance use disorders. <i>Addiction</i> 2005; 100(12):1868-1874.                                                                                                                                                 |
| 12. | Bergemann N, Mundt C, Parzer P, Pakrasi M, Eckstein-Mannsperger U, Haisch S et al. Estrogen as an adjuvant therapy to antipsychotics does not prevent relapse in women suffering from schizophrenia: results of a placebo-controlled double-blind study. <i>Schizophrenia Research</i> 2005; 74(2-3):125-134.                                                                         |
| 13. | Rao U, Ott GE, Lin KM, Gertsik L, Poland RE. Effect of bupropion on nocturnal urinary free cortisol and its association with antidepressant response. <i>Journal of Psychiatric Research</i> 2005; 39(2):183-190.                                                                                                                                                                     |
| 14. | Whyte J, Hart T, Vaccaro M, Grieb-Neff P, Risser A, Polansky M et al. Effects of methylphenidate on attention deficits after traumatic brain injury: a multidimensional, randomized, controlled trial. <i>American Journal of Physical Medicine &amp; Rehabilitation</i> 2004; 83(6):401-420.                                                                                         |
| 15. | Incrocci L, Hop WC, Slob AK. Efficacy of sildenafil in an open-label study as a continuation of a double-blind study in the treatment of erectile dysfunction after radiotherapy for prostate cancer. <i>Urology</i> 2003; 62(1):116-120.                                                                                                                                             |
| 16. | Deary AJ, Schumann AL, Murfet H, Haydock S, Foo RS, Brown MJ. Influence of drugs and gender on the arterial pulse wave and natriuretic peptide secretion in untreated patients with                                                                                                                                                                                                   |



|     |                                                                                                                                                                                                                                                                                                                                 |
|-----|---------------------------------------------------------------------------------------------------------------------------------------------------------------------------------------------------------------------------------------------------------------------------------------------------------------------------------|
|     | essential hypertension. <i>Clinical Science</i> 2002; 103(5):493-499.                                                                                                                                                                                                                                                           |
| 17. | Reitberg DP, Del RE, Weiss SL, Rebell G, Zaias N. Single-patient drug trial methodology for allergic rhinitis. <i>Annals of Pharmacotherapy</i> 2002; 36(9):1366-1374.                                                                                                                                                          |
| 18. | White JM, Danz C, Kneebone J, La Vincente SF, Newcombe DA, Ali RL. Relationship between LAAM-methadone preference and treatment outcomes. <i>Drug &amp; Alcohol Dependence</i> 2002; 66(3):295-301.                                                                                                                             |
| 19. | Deary AJ, Schumann AL, Murfet H, Haydock SF, Foo RS, Brown MJ. Double-blind, placebo-controlled crossover comparison of five classes of antihypertensive drugs. <i>Journal of Hypertension</i> 2002; 20(4):771-777.                                                                                                             |
| 20. | Juan O, Campos JM, Caranana V, Sanchez JJ, Casan R, Alberola V. A randomized, crossover comparison of standard-dose versus low-dose lenograstim in the prophylaxis of post-chemotherapy neutropenia. <i>Supportive Care in Cancer</i> 2001; 9(4):241-246.                                                                       |
| 21. | Koran LM, Gelenberg AJ, Kornstein SG, Howland RH, Friedman RA, DeBattista C et al. Sertraline versus imipramine to prevent relapse in chronic depression. <i>Journal of Affective Disorders</i> 2001; 65(1):27-36.                                                                                                              |
| 22. | Dasbach EJ, Carides GW, Gerth WC, Santanello NC, Pigeon JG, Kramer. Work and productivity loss in the rizatriptan multiple attack study. <i>Cephalalgia</i> 2000; 20(9):830-834.                                                                                                                                                |
| 23. | Dickerson JE, Hingorani AD, Ashby MJ, Palmer CR, Brown MJ. Optimisation of antihypertensive treatment by crossover rotation of four major classes. <i>Lancet</i> 1999; 353(9169):2008-2013.                                                                                                                                     |
| 24. | Martinek J, Blum AL, Stolte M, Hartmann M, Verdu EF, Luhmann R et al. Effects of pumaprazole (BY841), a novel reversible proton pump antagonist, and of omeprazole, on intragastric acidity before and after cure of <i>Helicobacter pylori</i> infection. <i>Alimentary Pharmacology &amp; Therapeutics</i> 1999; 13(1):27-34. |
| 25. | Weiss R, Ferry D, Pickering E, Smith LK, Dennish G, III, Krug-Gourley S et al. Effectiveness of three different doses of carvedilol for exertional angina. Carvedilol-Angina Study Group. <i>American Journal of Cardiology</i> 1998; 82(8):927-931.                                                                            |
| 26. | Whyte J, Hart T, Schuster K, Fleming M, Polansky M, Coslett HB. Effects of methylphenidate on attentional function after traumatic brain injury. A randomized, placebo-controlled trial. <i>American Journal of Physical Medicine &amp; Rehabilitation</i> 1997; 76(6):440-450.                                                 |
| 27. | Walker JS, Sheather-Reid RB, Carmody JJ, Vial JH, Day RO. Nonsteroidal antiinflammatory drugs in rheumatoid arthritis and osteoarthritis: support for the concept of "responders" and "nonresponders". <i>Arthritis &amp; Rheumatism</i> 1997; 40(11):1944-1954.                                                                |
| 28. | Ernst DS, Brasher P, Hagen N, Paterson AH, MacDonald RN, Bruera E. A randomized, controlled trial of intravenous clodronate in patients with metastatic bone disease and pain. <i>Journal of Pain &amp; Symptom Management</i> 1997; 13(6):319-326.                                                                             |
| 29. | O'Driscoll G, Green D, Taylor RR. Simvastatin, an HMG-coenzyme A reductase inhibitor, improves endothelial function within 1 month. <i>Circulation</i> 1997; 95(5):1126-1131.                                                                                                                                                   |
| 30. | Collins JJ, Geake J, Grier HE, Houck CS, Thaler HT, Weinstein HJ et al. Patient-controlled analgesia for mucositis pain in children: a three-period crossover study comparing morphine and hydromorphone. <i>Journal of Pediatrics</i> 1996; 129(5):722-728.                                                                    |
| 31. | Boolell M, Gepi-Attee S, Gingell JC, Allen MJ. Sildenafil, a novel effective oral therapy for male erectile dysfunction. <i>British Journal of Urology</i> 1996; 78(2):257-261.                                                                                                                                                 |
| 32. | Wysocki M, Andersson OK, Persson B, Bagge U, Braide M. Hemorheologic effects of vasodilation in essential hypertension. <i>Angiology</i> 1996; 47(9):869-878.                                                                                                                                                                   |
| 33. | Miyazaki S, Nonogi H, Goto Y, Sumiyoshi T, Haze K, Hiramori K. Comparison of the therapeutic efficacy of continuous and intermittent injection of isosorbide dinitrate: a randomized study on unstable angina. <i>Internal Medicine</i> 1995; 34(9):856-862.                                                                    |
| 34. | Meeves S, Hafner K, Park G, Weber M. Three-period crossover trial with ambulatory blood pressure monitoring for evaluating antihypertensive therapy. <i>American Heart Journal</i> 1995; 130(4):841-848.                                                                                                                        |

|     |                                                                                                                                                                                                                                                                                                            |
|-----|------------------------------------------------------------------------------------------------------------------------------------------------------------------------------------------------------------------------------------------------------------------------------------------------------------|
| 35. | Rederich G, Rapoport A, Cutler N, Hazelrigg R, Jamerson B. Oral sumatriptan for the long-term treatment of migraine: clinical findings. <i>Neurology</i> 1995; 45(8:Suppl 7):Suppl-20.                                                                                                                     |
| 36. | Stenberg A, Lackgren G. Desmopressin tablets in the treatment of severe nocturnal enuresis in adolescents. <i>Pediatrics</i> 1994; 94(6:Pt 1):t-6.                                                                                                                                                         |
| 37. | Van den Eeden SK, Koepsell TD, Longstreth WT, Jr., van BG, Daling JR, McKnight B. Aspartame ingestion and headaches: a randomized crossover trial. <i>Neurology</i> 1994; 44(10):1787-1793.                                                                                                                |
| 38. | Langeland T, Fagertun HE, Larsen S. Therapeutic effect of loratadine on pruritus in patients with atopic dermatitis. A multi-crossover-designed study. <i>Allergy</i> 1994; 49(1):22-26.                                                                                                                   |
| 39. | Campbell SH, Hickey-Dwyer M, Harding SP. Double-masked three-period crossover investigation of timolol in control of raised intraocular pressure. <i>Eye</i> 1993; 7(Pt 1):105-108.                                                                                                                        |
| 40. | Johnsen V, Brun JG, Fjeld E, Hansen K, Sydnes OA, Ugstad MB. Morning stiffness and nighttime pain in ankylosing spondylitis. A comparison between enteric-coated and plain naproxen tablets. <i>European Journal of Rheumatology &amp; Inflammation</i> 1992; 12(2):37-42.                                 |
| 41. | Terho P. Desmopressin in nocturnal enuresis. <i>Journal of Urology</i> 1991; 145(4):818-820.                                                                                                                                                                                                               |
| 42. | Molloy DW, Guyatt GH, Wilson DB, Duke R, Rees L, Singer J. Effect of tetrahydroaminoacridine on cognition, function and behaviour in Alzheimer's disease. <i>CMAJ Canadian Medical Association Journal</i> 1991; 144(1):29-34.                                                                             |
| 43. | Greco R, Schiattarella M, Wolff S, D'Alterio D, Tartaglia P. Long-term efficacy of nitroglycerin patch in stable angina pectoris. <i>American Journal of Cardiology</i> 1990; 65(21):9J-15J.                                                                                                               |
| 44. | Sabesin SM, Boyce HW, Jr., King CE, Mann JA, Ruoff G, Wall E. Comparative evaluation of gastrointestinal intolerance produced by plain and tri-buffered aspirin tablets. <i>American Journal of Gastroenterology</i> 1988; 83(11):1220-1225.                                                               |
| 45. | Johannessen T, Fjosne U, Kleveland PM, Halvorsen T, Kristensen P, Loge I et al. Cimetidine responders in non-ulcer dyspepsia. <i>Scandinavian Journal of Gastroenterology</i> 1988; 23(3):327-336.                                                                                                         |
| 46. | Kauppila A, Makila UM, Makarainen L, Puolakka J, Seppala A. Tiaprofenic acid in the treatment of primary dysmenorrhoea. <i>European Journal of Obstetrics, Gynecology, &amp; Reproductive Biology</i> 1986; 22(5-6):359-363.                                                                               |
| 47. | Koopmans PP, Thien T, Thomas CM, Van den Berg RJ, Gribnau FW. The effects of sulindac and indomethacin on the anti-hypertensive and diuretic action of hydrochlorothiazide in patients with mild to moderate essential hypertension. <i>British Journal of Clinical Pharmacology</i> 1986; 21(4):417-423.  |
| 48. | Parodi O, Simonetti I, Michelassi C, Carpeggiani C, Biagini A, L'Abbate A et al. Comparison of verapamil and propranolol therapy for angina pectoris at rest: a randomized, multiple-crossover, controlled trial in the coronary care unit. <i>American Journal of Cardiology</i> 1986; 57(11):899-906.    |
| 49. | Gheorghide M, St CC, St CJ, Freedman D, Schwemer G. Short- and long-term treatment of stable effort angina with nifedipine, a new calcium channel blocker: a double-blind, placebo-controlled, randomised, repeated cross-over study. <i>British Journal of Clinical Pharmacology</i> 1985; 20:Suppl-205S. |
| 50. | Dickstein K, Knutsen H. A double-blind multiple crossover trial evaluating a transdermal nitroglycerin system vs placebo. <i>European Heart Journal</i> 1985; 6(1):50-56.                                                                                                                                  |
| 51. | Kleveland PM, Larsen S, Sandvik L, Kristensen P, Johannessen T, Hafstad PE et al. The effect of cimetidine in non-ulcer dyspepsia. Experience with a multi-cross-over model. <i>Scandinavian Journal of Gastroenterology</i> 1985; 20(1):19-24.                                                            |
| 52. | Kauppila A, Ronnberg L. Naproxen sodium in dysmenorrhea secondary to endometriosis. <i>Obstetrics &amp; Gynecology</i> 1985; 65(3):379-383.                                                                                                                                                                |
| 53. | Deroover J, Baro F, Bourguignon RP, Smets P. Tiapride versus placebo: a double-blind comparative study in the management of Huntington's chorea. <i>Current Medical Research &amp; Opinion</i> 1984; 9(5):329-338.                                                                                         |
| 54. | Crean PA, Ribeiro P, Crea F, Davies GJ, Ratcliffe D, Maseri A. Failure of transdermal nitroglycerin to improve chronic stable angina: a randomized, placebo-controlled, double-blind,                                                                                                                      |

|     |                                                                                                                                                                                                                                                            |
|-----|------------------------------------------------------------------------------------------------------------------------------------------------------------------------------------------------------------------------------------------------------------|
|     | double crossover trial. <i>American Heart Journal</i> 1984; 108(6):1494-1500.                                                                                                                                                                              |
| 55. | De CR, Carpeggiani C, L'Abbate A. A double-blind, placebo-controlled study of ketanserin in patients with Prinzmetal's angina. Evidence against a role for serotonin in the genesis of coronary vasospasm. <i>Circulation</i> 1984; 69(5):889-894.         |
| 56. | Hunter JR, Galloway JR, Brooke MM, Kutner MH, Rudman D, Vogel RL et al. Effects of allopurinol in Duchenne's muscular dystrophy. <i>Archives of Neurology</i> 1983; 40(5):294-299.                                                                         |
| 57. | Boissl K, Dreyfus JF, Delmotte M. Studies on the dependence-inducing potential of zopiclone and triazolam. <i>International Pharmacopsychiatry</i> 1982; 17:Suppl-7.                                                                                       |
| 58. | Glass RM, Uhlenhuth EH, Matuzas W, McCracken S, Greene S. Subject-own-control design in evaluating clinical antidepressant effects. <i>Journal of Affective Disorders</i> 1982; 4(4):373-381.                                                              |
| 59. | Damsgaard EM, Faber O, Froland A, Iversen S. Therapeutic effect of tolbutamide in non-insulin dependent diabetes mellitus (NIDDM). Relation to beta-cell function. <i>Acta Endocrinologica</i> 1982; 100(3):416-420.                                       |
| 60. | Riihiluoma P, Wuolijoki E, Pulkkinen MO. Treatment of primary dysmenorrhea with diclofenac sodium. <i>European Journal of Obstetrics, Gynecology, &amp; Reproductive Biology</i> 1981; 12(3):189-194.                                                      |
| 61. | Subramanian B, Bowles M, Lahiri A, Davies AB, Raftery EB. Long-term antianginal action of verapamil assessed with quantitated serial treadmill stress testing. <i>American Journal of Cardiology</i> 1981; 48(3):529-535.                                  |
| 62. | Uhlenhuth EH, Glass RM, Fischman MW. Multiple crossover designs with an antianxiety agent and an antidepressant. <i>Psychopharmacology Bulletin</i> 1979; 15(3):37-40.                                                                                     |
| 63. | Parodi O, Maseri A, Simonetti I. Management of unstable angina at rest by verapamil. A double-blind cross-over study in coronary care unit. <i>British Heart Journal</i> 1979; 41(2):167-174.                                                              |
| 64. | Gostick NK, Mayhew SR, Million R, Sagar D, Suxena SR, Ingram DF et al. A dose-response study of atenolol in mild to moderate hypertension in general practice. <i>Current Medical Research &amp; Opinion</i> 1977; 5(2):179-184.                           |
| 65. | Kellner R, Freese ML, Rada RT, Wall FJ. A pilot study of the short-term psychotropic effects of GPA 2640. <i>J Clin Pharmacol</i> 1976; 16(4):194-197.                                                                                                     |
| 66. | Huskisson EC, Scott PJ. Floctafenine: a new analgesic for use in rheumatic diseases. <i>Rheumatol Rehabil</i> 1977; 16(1):54-57.                                                                                                                           |
| 67. | Nikkila M, Inkovaara J, Heikkinen J. Once daily compared with twice daily administration of slow-release diltiazem as monotherapy for hypertension. <i>Ann Med</i> 1991; 23(2):141-145.                                                                    |
| 68. | Gibelli G, Negrini M, Bruno AM, Fiorini GL, Lambiase M, Magenta G et al. Chronic effects of transdermal nitroglycerin in stable angina pectoris: a within-patient, placebo-controlled study. <i>Int J Clin Pharmacol Ther Toxicol</i> 1989; 27(9):436-441. |

Appendix Figure 1: Patients with chronic intestinal pseudo-obstruction treated with prucalopride or placebo for pain relief<sup>14</sup>

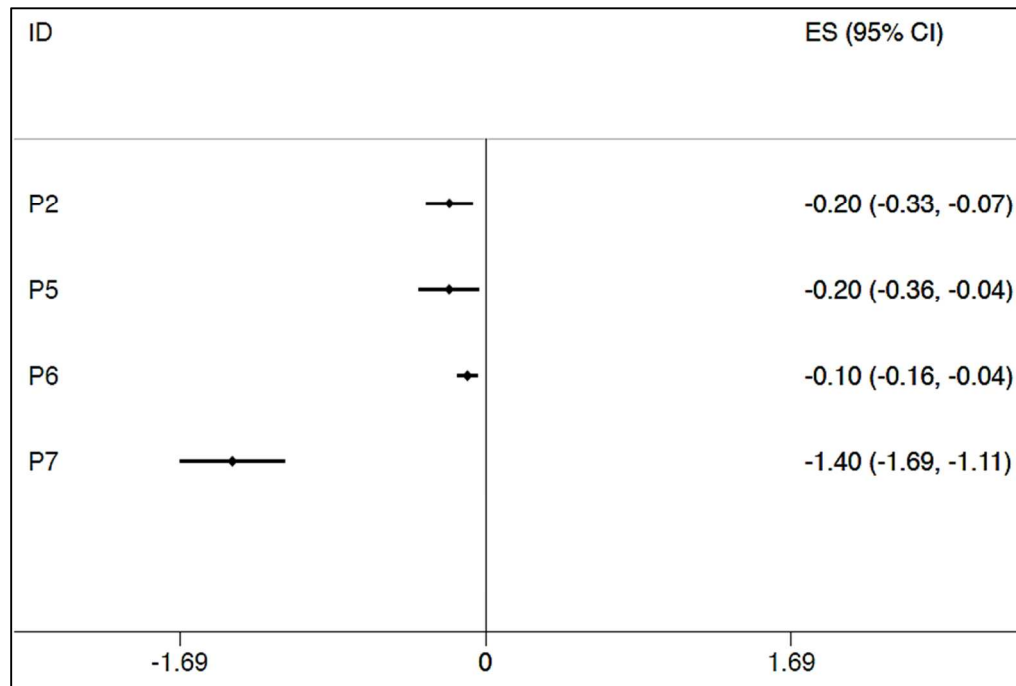

Appendix Figure 1 Legend:

Data from this figure was extracted from the study published by Emmanuel et al in 2011, which investigates the use of prucalopride or placebo for pain relief (among other outcomes) in patients with chronic intestinal pseudo-obstruction. The treatment effect is -0.440 (-0.771 to -0.110) for Appendix Figure 1.

**Appendix Figure 2: Patients with chronic tension-type headaches treated with dextroamphetamine or control and effect on mean daily grade decrease in headache<sup>15</sup>**

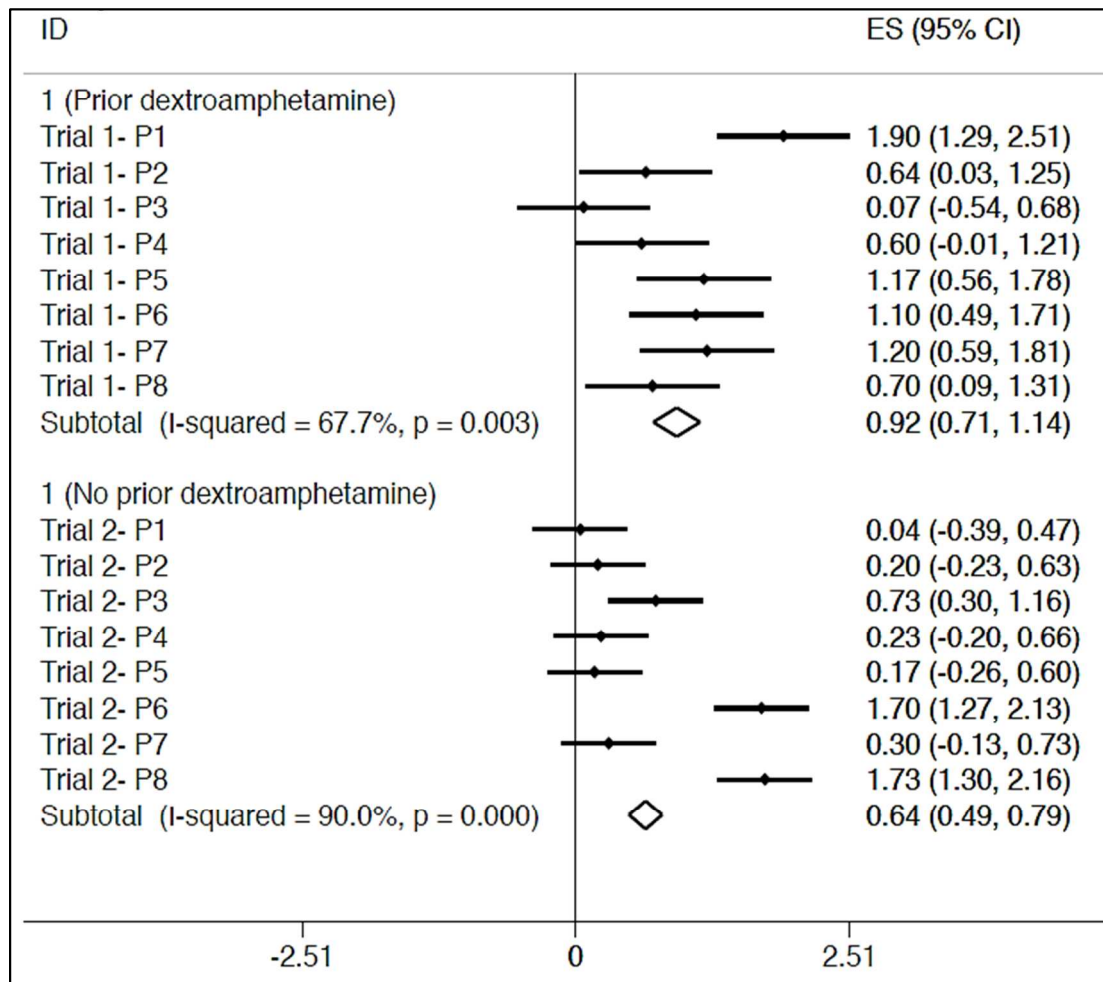

**Appendix Figure 2 Legend:** Data from this figure was extracted from the study published by Haas et al in 2004, which investigates the use of dextroamphetamine or control in patients with chronic-type for improvement on mean daily grade in headache. The treatment effect is mean daily grade decrease in chronic tension-type headache for Appendix Figure 2.

**Appendix Figure 3: Patients with migraine headaches treated with dextroamphetamine or control and effect on mean daily grade decrease in headache<sup>15</sup>**

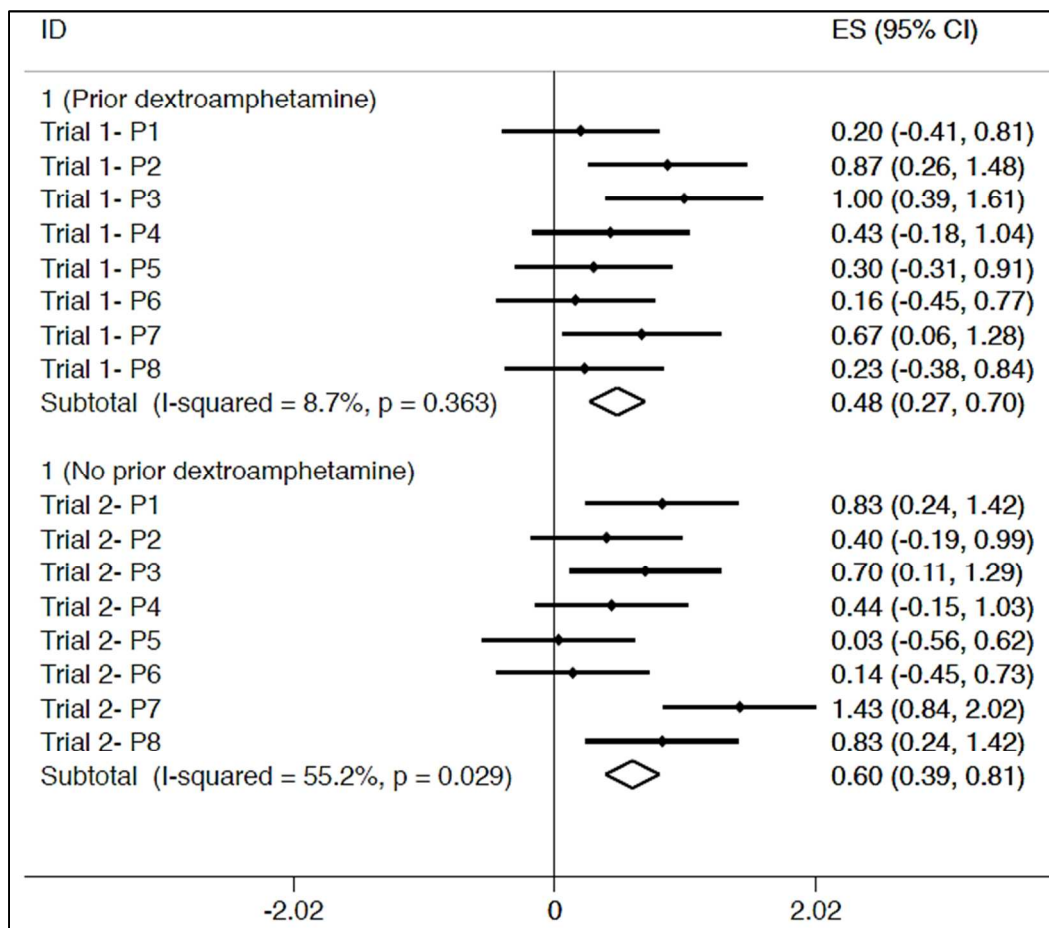

**Appendix Figure 3 Legend:** Data from this figure was extracted from the study published by Haas et al in 2004, which investigates the use of dextroamphetamine or control in patients with chronic-type and migraine headaches for improvement on mean daily grade in headache. The treatment effect is mean daily grade decrease in migraine headache for Appendix Figure 3.

Appendix Figure 4: Patients with fibromyalgia treated with amitriptyline or placebo and its effect on a 7-point symptom scale<sup>16</sup>

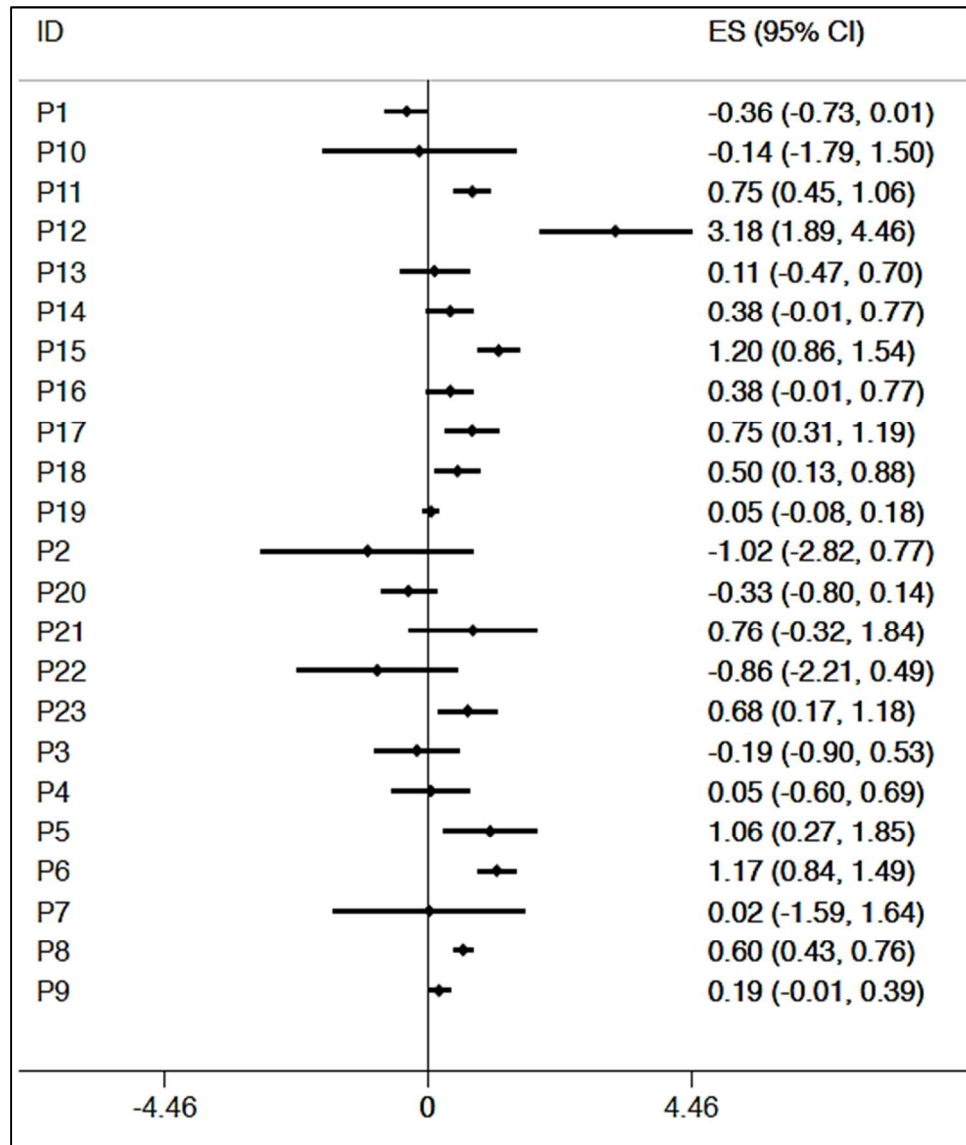

Appendix Figure 4 Legend: Data from this figure was extracted from the study published by Jaeschke et al in 1991, which investigates the effect of amitriptyline or placebo on a 7-point symptom scale in patients with fibromyalgia. The treatment effect is 0.427 (0.210 to 0.645) for Appendix Figure 4.

Appendix Figure 5: Patients with fibromyalgia treated with amitriptyline or placebo and its effect on tender point changes count<sup>16</sup>

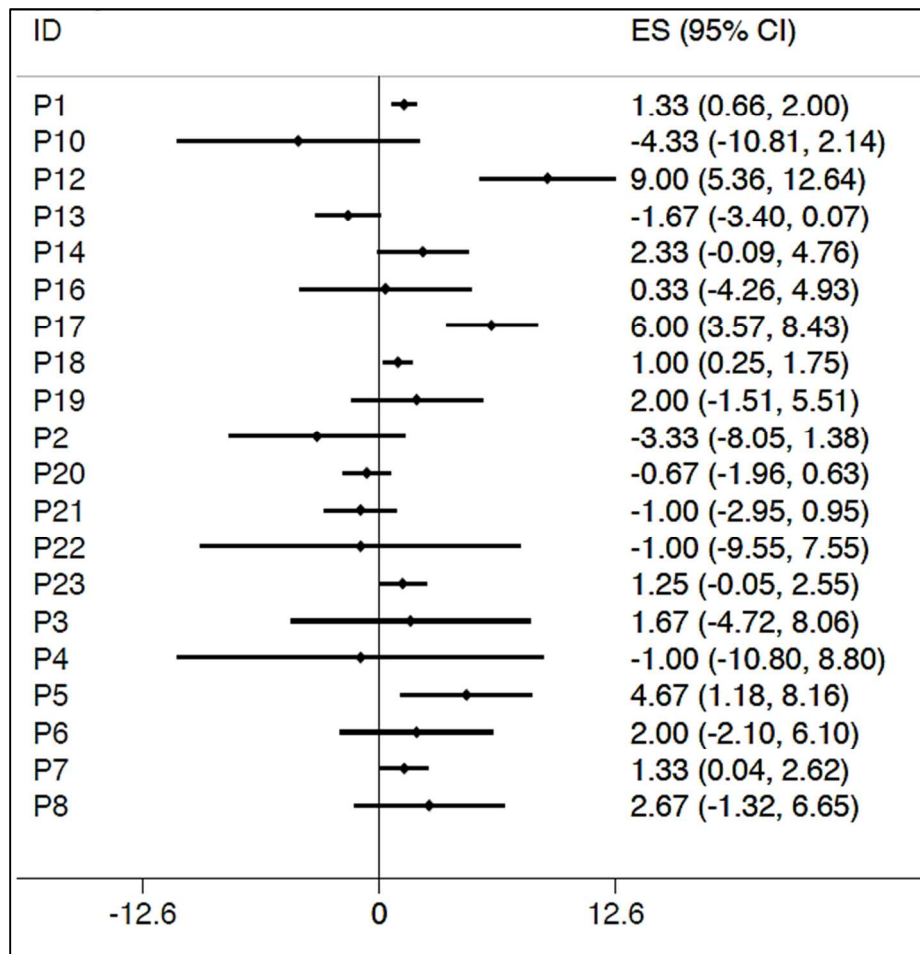

Appendix Figure 5 Legend: Data from this figure was extracted from the study published by Jaeschke et al in 1991, which investigates the effect of amitriptyline or placebo on tender point changes count in patients with fibromyalgia. The treatment effect is 1.320 (0.404 to 2.236) for Appendix Figure 5.



Appendix Figure 6: Patients with peptic ulcers, oesophagitis grade I, II, or III, or with reflux or ulcer-like symptom profiles were treated with cimetidine or placebo and its effect on a 6-point symptom scale<sup>17</sup>

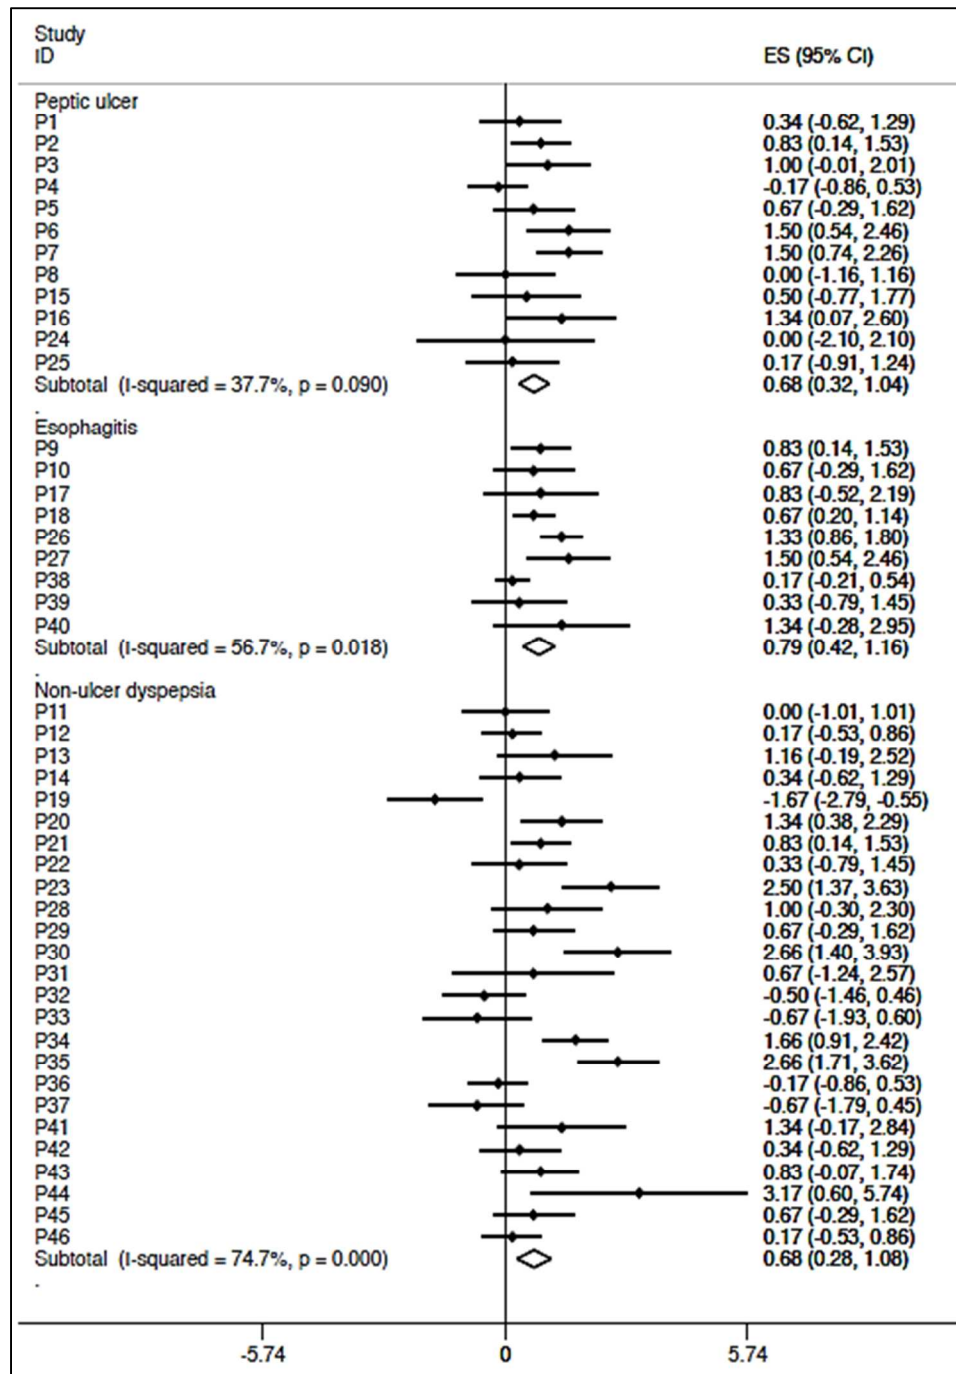

Appendix Figure 6 Legend: Data from this figure was extracted from the study published by Johannessen et al in 1992, which investigates the effect of cimetidine or placebo on a 6-point symptom scale in patients with peptic ulcers, oesophagitis grade I, II, or III, or with reflux or ulcer-like symptom profiles. The treatment effect is 0.698 (0.466 to 0.931) for Appendix Figure 6.

Appendix Figure 7: Patients with irreversible chronic airflow limitation treated with theophylline or placebo and its effect on dyspnea<sup>18</sup>

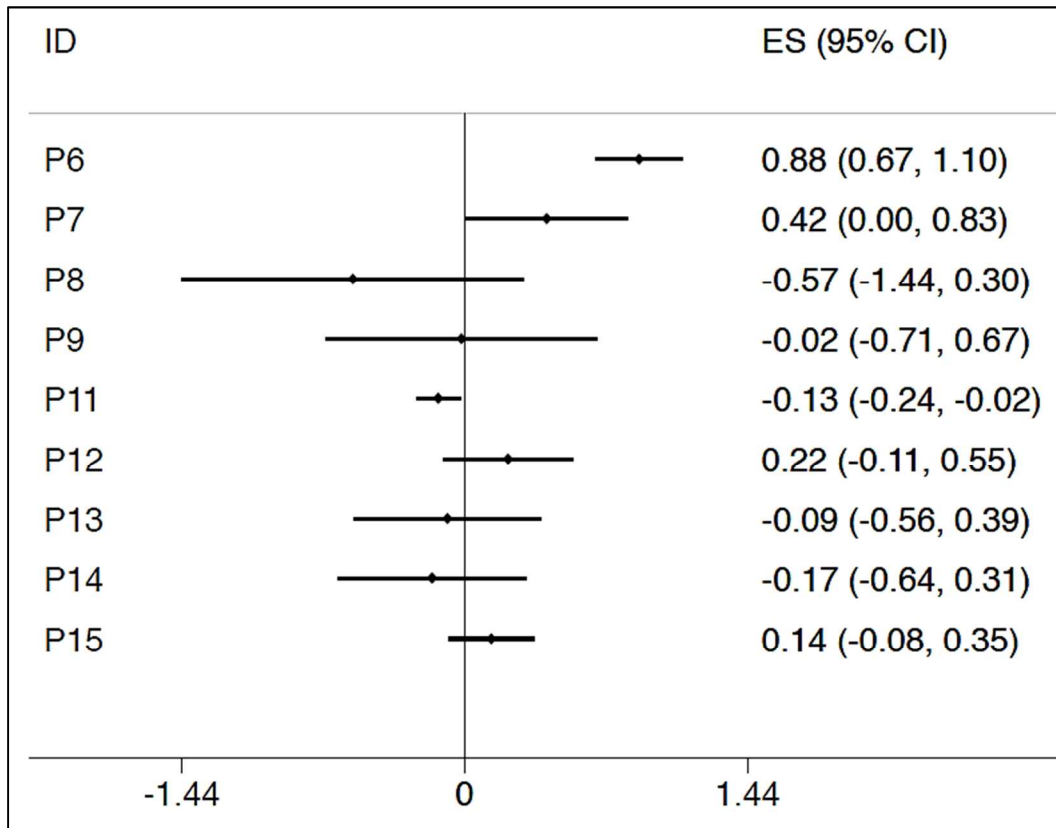

Appendix Figure 7 Legend: Data from this figure was extracted from the study published by Mahon et al in 1996, which investigates the effect of theophylline or placebo on dyspnea in patients with irreversible chronic airflow limitation. The treatment effect is 0.125 (-0.181 to 0.430) for Appendix Figure 7.

Appendix Figure 8: Patients with osteoarthritic pain treated with paracetamol and diclofenac and its effect on stiffness<sup>19</sup>

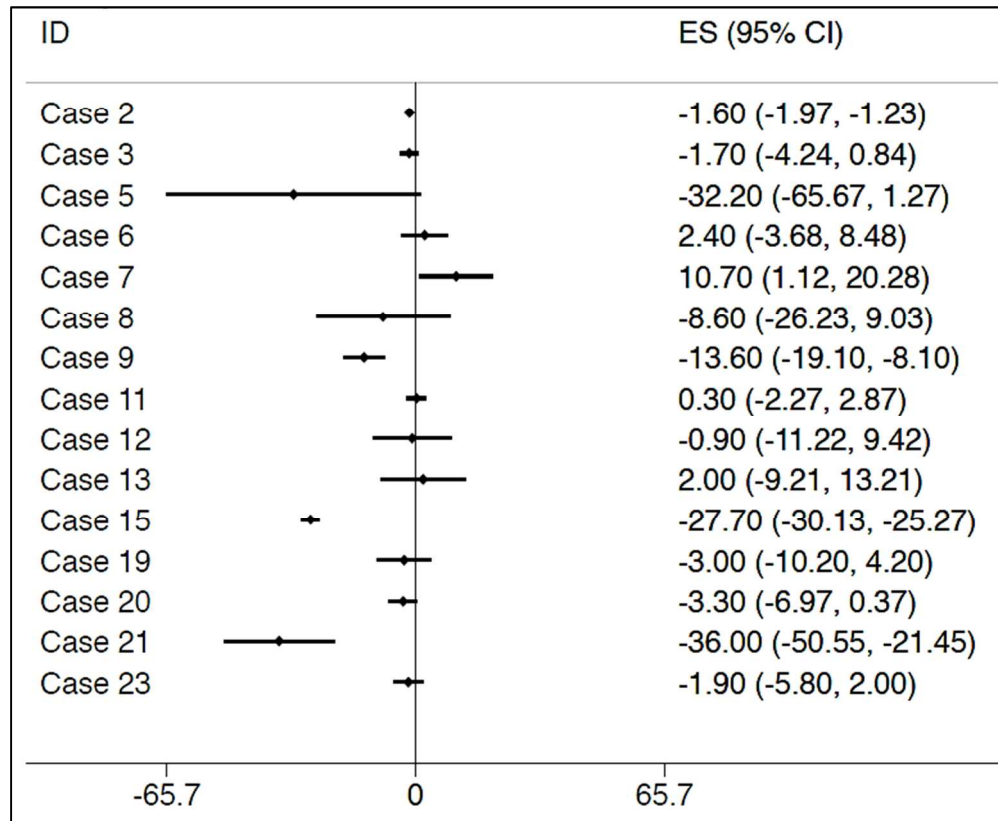

Appendix Figure 8 Legend: Data from this figure was extracted from the study published by March et al in 1994, which investigates the effect of paracetamol and diclofenac on stiffness in patients with osteoarthritic pain. The treatment effect is mean difference in stiffness (mm) for Appendix Figure 8.

Appendix Figure 9: Patients with nonreversible chronic airflow limitation treated with either ipratropium bromide, theophylline, salbutamol, or beclomethane (all compared to placebo) and its effect on a 4-item symptom questionnaire<sup>20</sup>

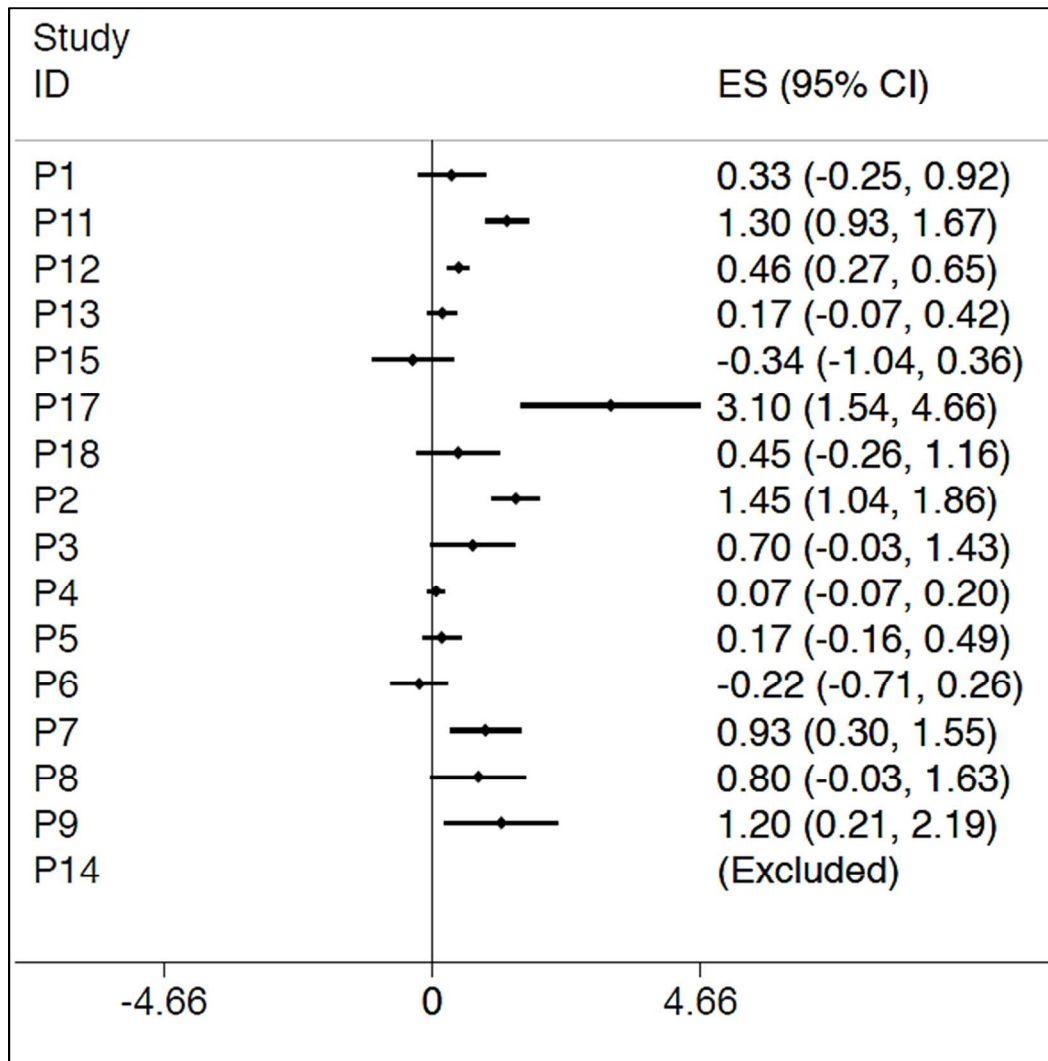

**Appendix Figure 9 Legend:** Data from this figure was extracted from the study published by Patel et al in 1991, which investigates the effect of ipratropium bromide, theophylline, salbutamol, or beclomethane (all compared to placebo) on a 4-item symptom questionnaire in patients with nonreversible chronic airflow limitation. The treatment effect is 0.240 (0.131 to 0.350) for Appendix Figure 9.

Appendix Figure 10: Patients previously taking warfarin for either atrial fibrillation or deep vein thrombosis treated with apo-warfarin and 20coumadin and its effect on international normalized ratio<sup>12</sup>

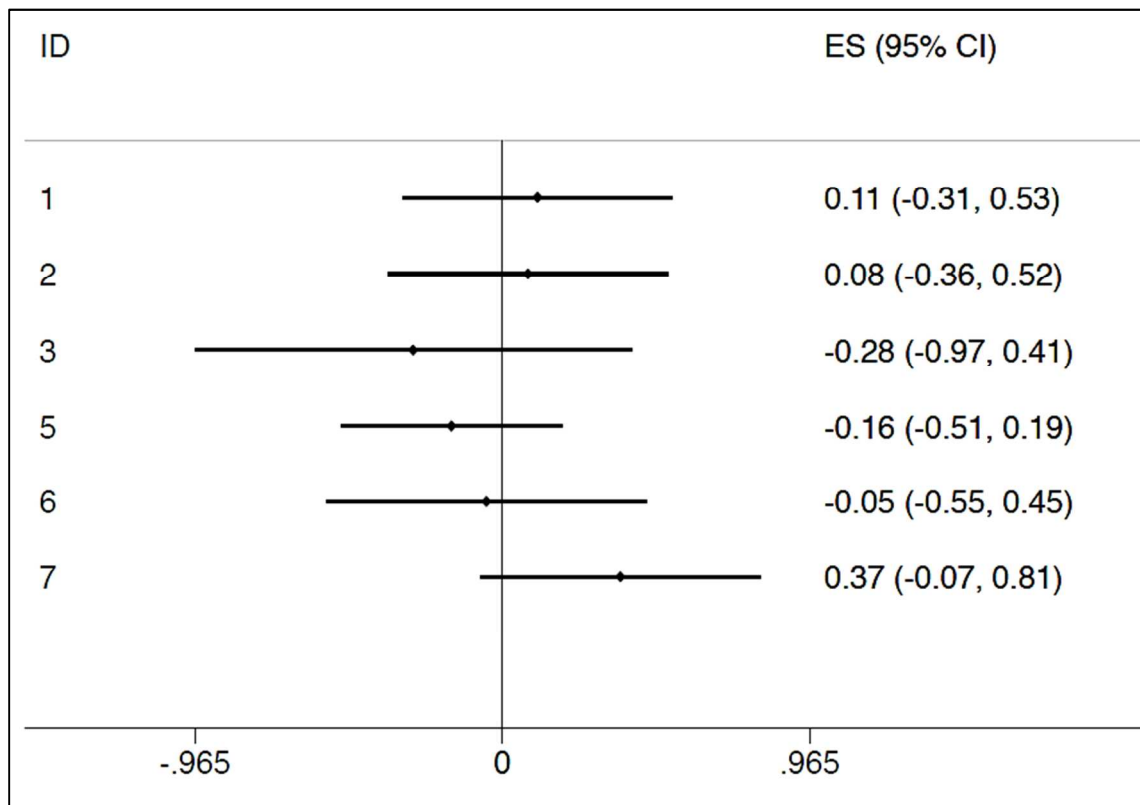

Appendix Figure 10 Legend: Data from this figure was extracted from the study published by Pereira et al in 1995, which investigates the effect of apo-warfarin and Coumadin on international normalized ratio in patients previously taking warfarin for either atrial fibrillation or deep vein thrombosis. The treatment effect is 0.027 (-0.155 to 0.209) for Appendix Figure 10.

**Appendix Figure 11: Hospitalized children and adolescents with attention-deficit hyperactivity disorder treated with methylphenidate and placebo and its effect on Conners 15-item rating scale scores<sup>21</sup>**

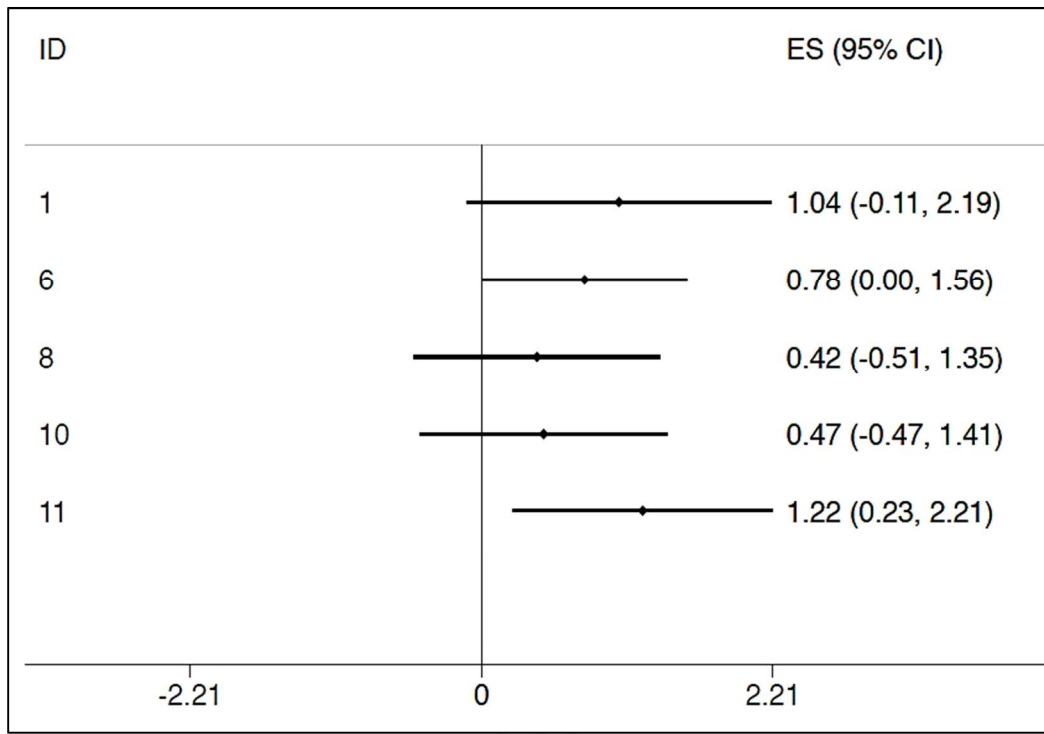

**Appendix Figure 11 Legend:** Data from this figure was extracted from the study published by Wallace et al in 1994, which investigates the effect of methylphenidate and placebo on Conners 15-item rating scale scores in hospitalized children and adolescents with attention-deficit hyperactivity disorder. The treatment effect is 0.759 (0.341 to 1.178) for Appendix Figure 11.

Appendix Figure 12: Patients already prescribed quinine treated with quinine sulphate and placebo, and its effect on changes in number of cramps<sup>22</sup>

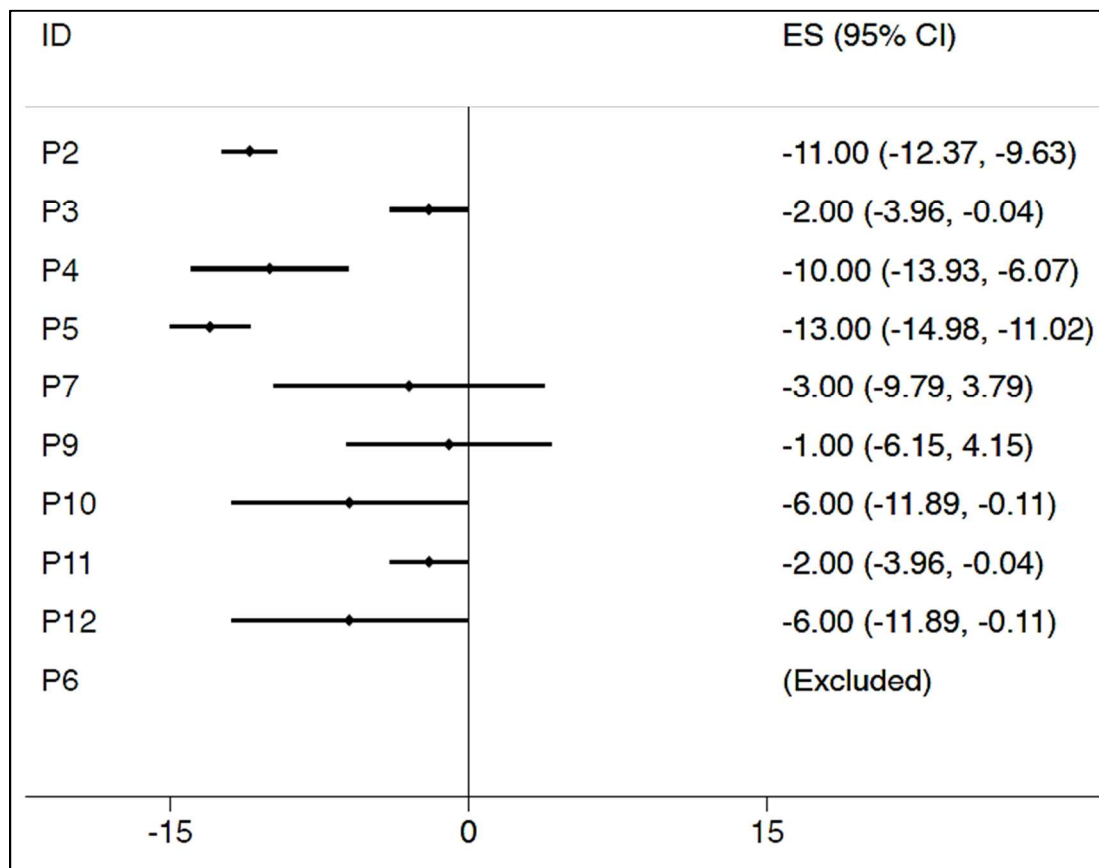

**Appendix Figure 12 Legend:** Data from this figure was extracted from the study published by Woodfield et al in 2005, which investigates the effect of quinine sulphate and placebo on changes in number of cramps in patients already prescribed quinine. The treatment effect is -18.823 (-28.527 to -9.120) for Appendix Figure 12.

**Appendix Figure 13: Patients already prescribed quinine treated with quinine sulphate and placebo, and its effect on total days with cramps<sup>22</sup>**

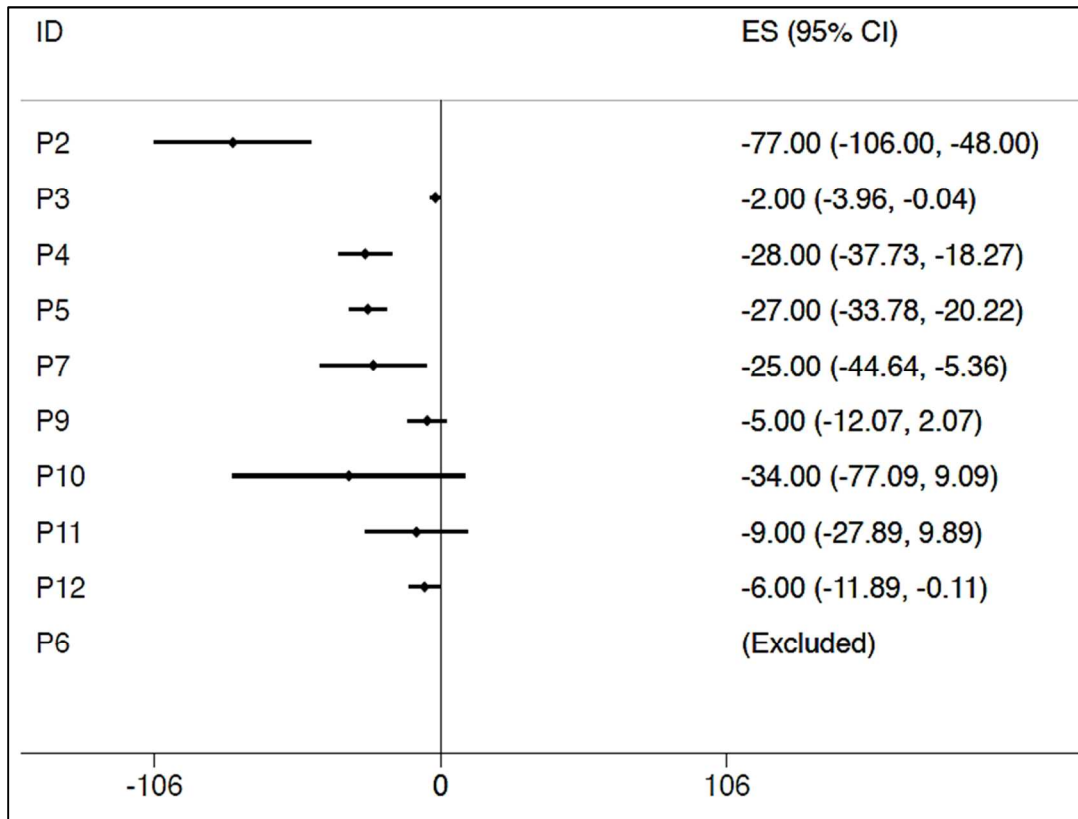

**Appendix Figure 13 Legend:** Data from this figure was extracted from the study published by Woodfield et al in 2005, which investigates the effect of quinine sulphate and placebo on total days with cramps in patients already prescribed quinine. The treatment effect is -6.181 (-9.798 to -2.563) for Appendix Figure 13.



**Appendix Figure 14: Patients with fibromyalgia syndrome treated with amitriptyline and the combination amitriptyline and fluoxetine and its effect on the Fibromyalgia Impact Questionnaire<sup>23</sup>**

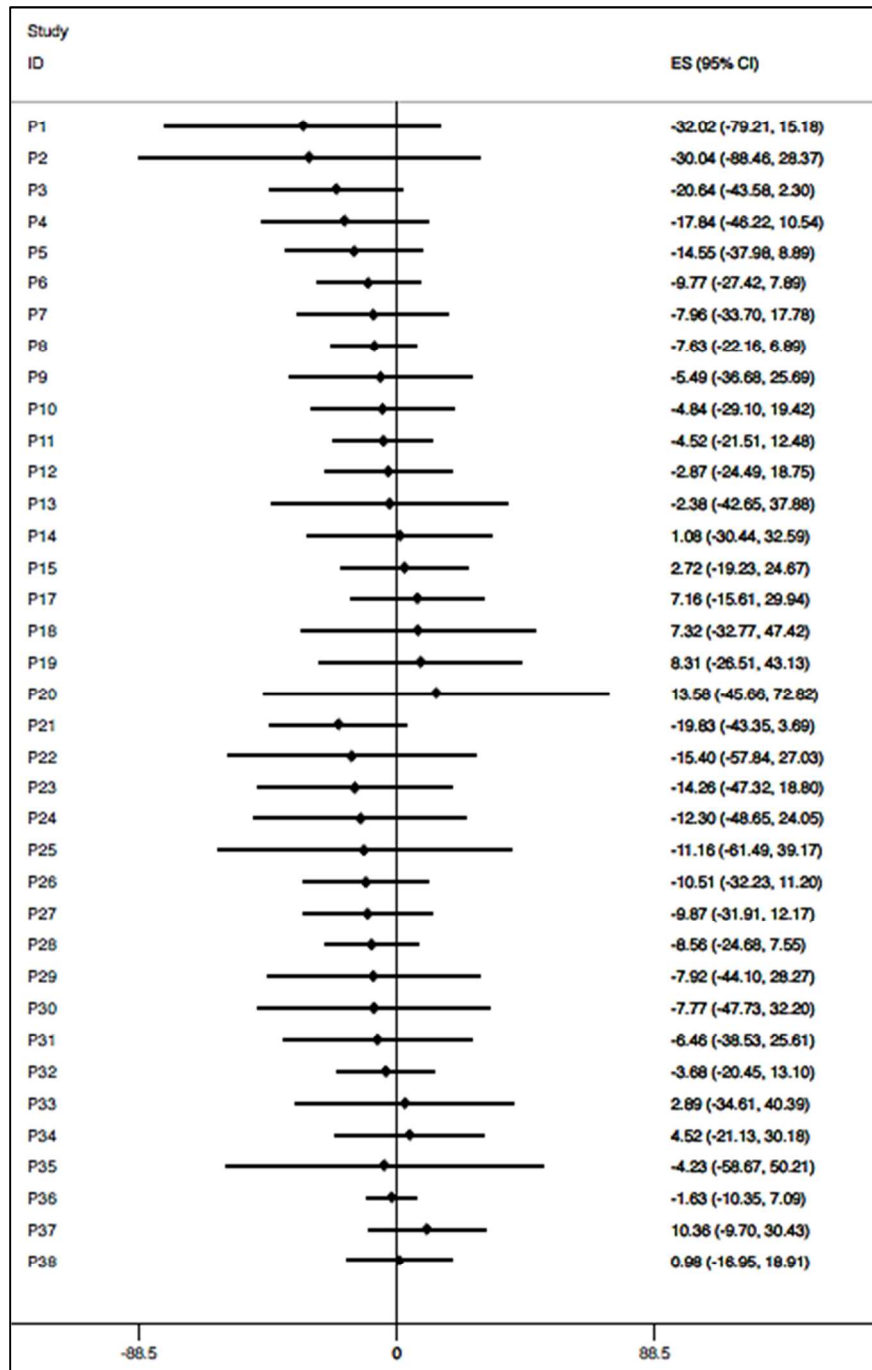

**Appendix Figure 14 Legend:** Data from this figure was extracted from the study published by Zucker et al in 2006, which investigates the effect of amitriptyline and the combination amitriptyline and fluoxetine on Fibromyalgia Impact Questionnaire in patients with fibromyalgia syndrome. The treatment effect is -5.019 (-8.784 to -1.254) for Appendix Figure 14.

**Appendix Figure 15: Children with mental retardation and fragmented sleep treated with melatonin and placebo and its effect on nights without awakening<sup>1</sup>**

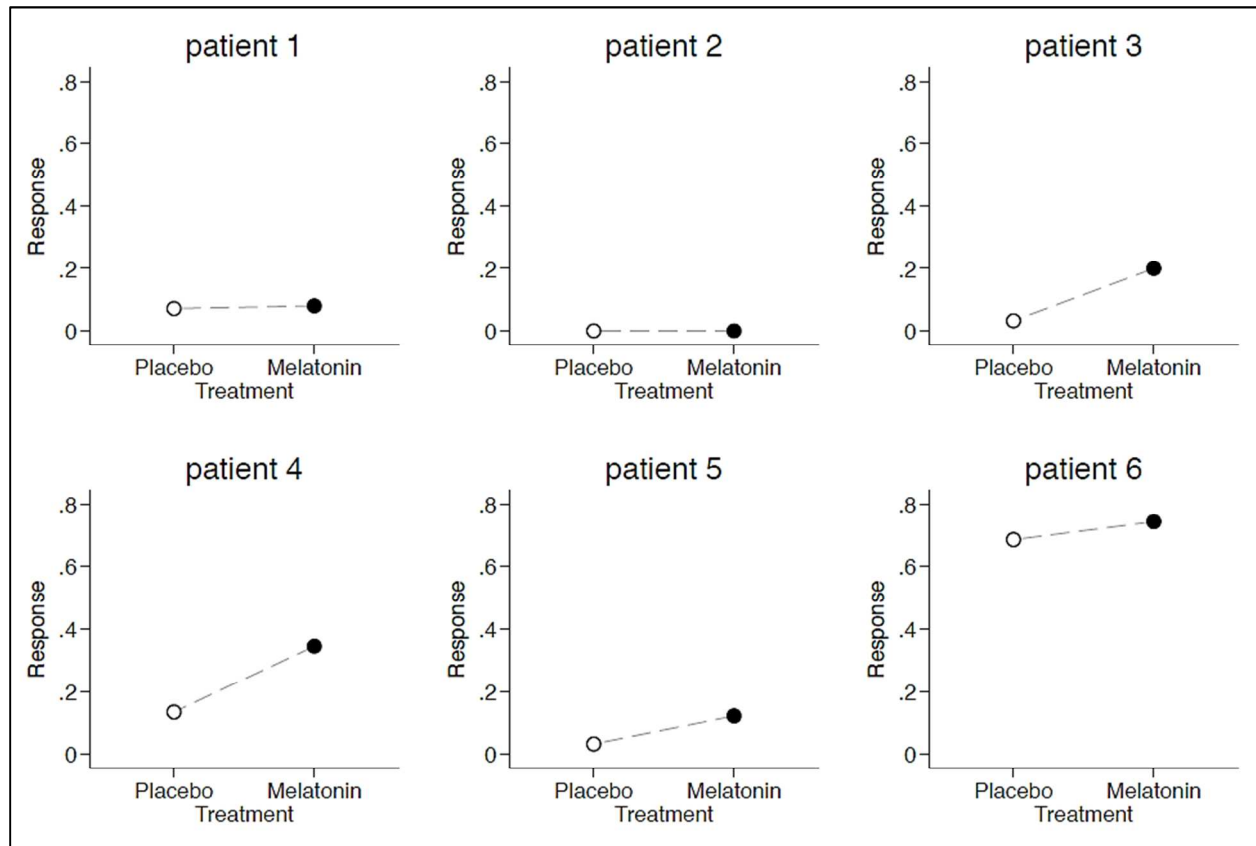

**Appendix Figure 15 Legend:** Data from this figure was extracted from the study published by Camfield et al in 1996, which investigates the effect of melatonin and placebo on nights without awakening in children with mental retardation and fragmented sleep. The treatment effect is 0.84 (0.20 to 1.48) for Appendix Figure 15. White circles indicate placebo; black circles indicate melatonin.

**Appendix Figure 16: Patients with traumatic spinal cord lesions treated with baclofen and placebo and its effect on anxiety<sup>2</sup>**

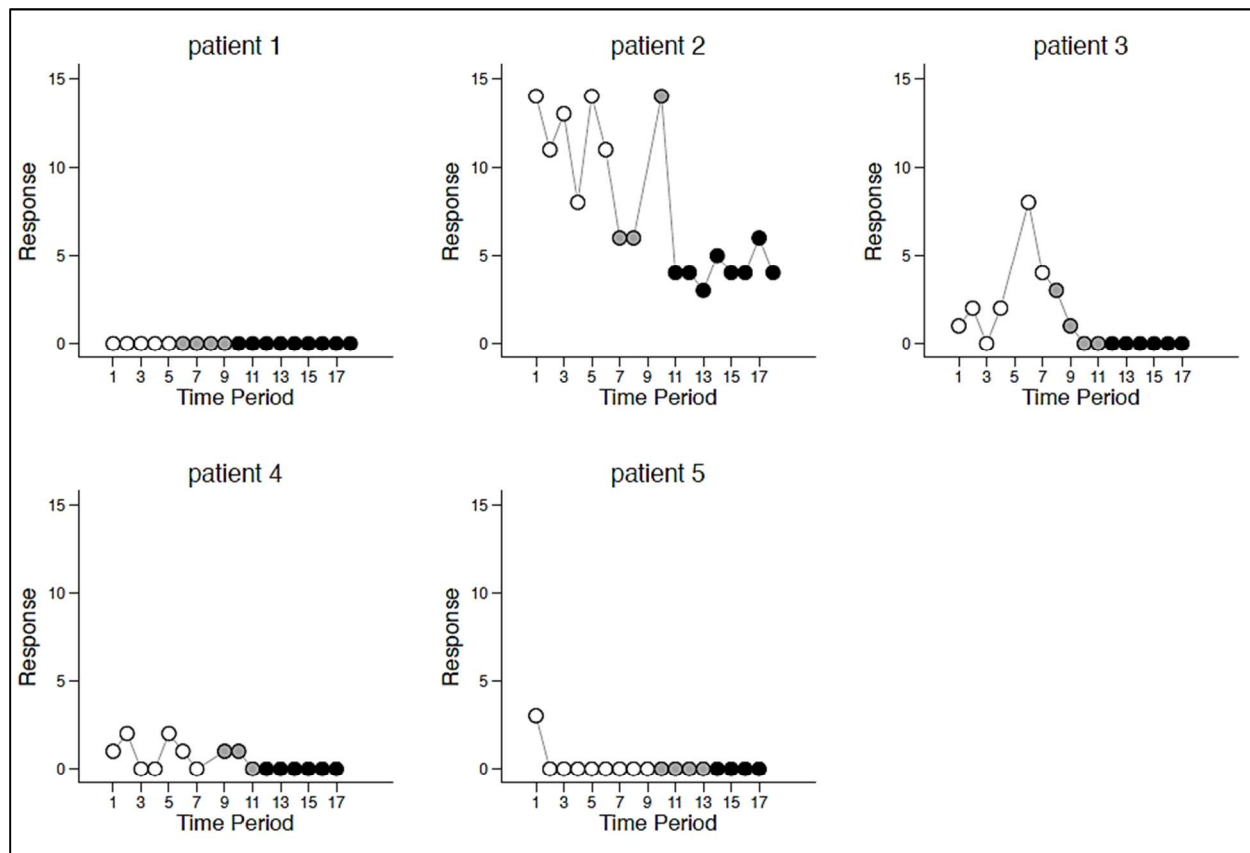

**Appendix Figure 16 Legend:** Data from this figure was extracted from the study published by Hinderer et al in 1990, which investigates the effect of baclofen and placebo on anxiety in patients with traumatic spinal cord lesions. The treatment effect is  $-1.06$  ( $-1.88$  to  $-0.23$ ) for Appendix Figure 16. White circles indicate placebo; grey circles indicate a half dose (40 mg/day) of baclofen; black circles indicate a full dose (80 mg/day) of baclofen.

Appendix Figure 17: Children with gastroesophageal reflux treated with cisapride and placebo and its effect on emetic episodes per day<sup>3</sup>

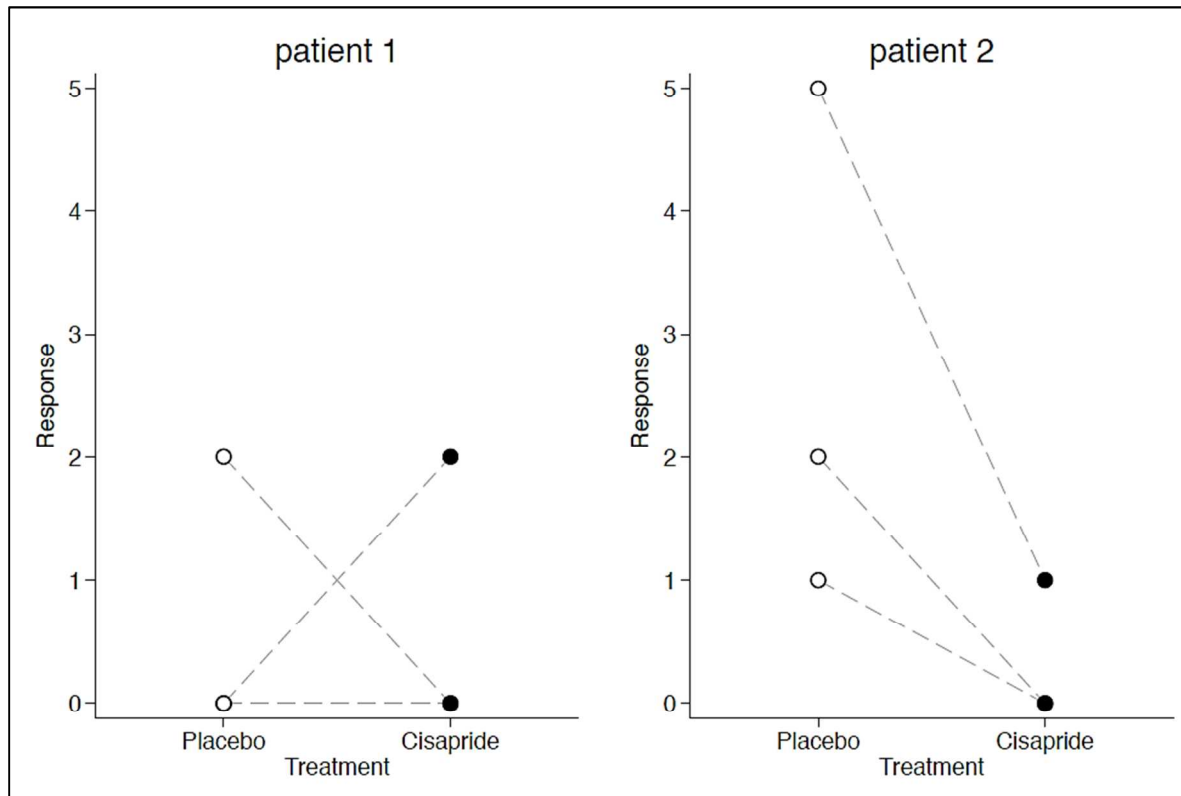

**Appendix Figure 17 Legend:** Data from this figure was extracted from the study published by Langer et al in 1993, which investigates the effect of cisapride and placebo on emetic episodes per day in children with gastroesophageal reflux. The treatment effect is -1.20 (-2.49 to 0.09) for Appendix Figure 17. White circles indicate placebo; black circles indicate cisapride.

**Appendix Figure 18: Nonsmokers with ulcerative colitis treated with nicotine gum and placebo and its effect on abdominal pain<sup>4</sup>**

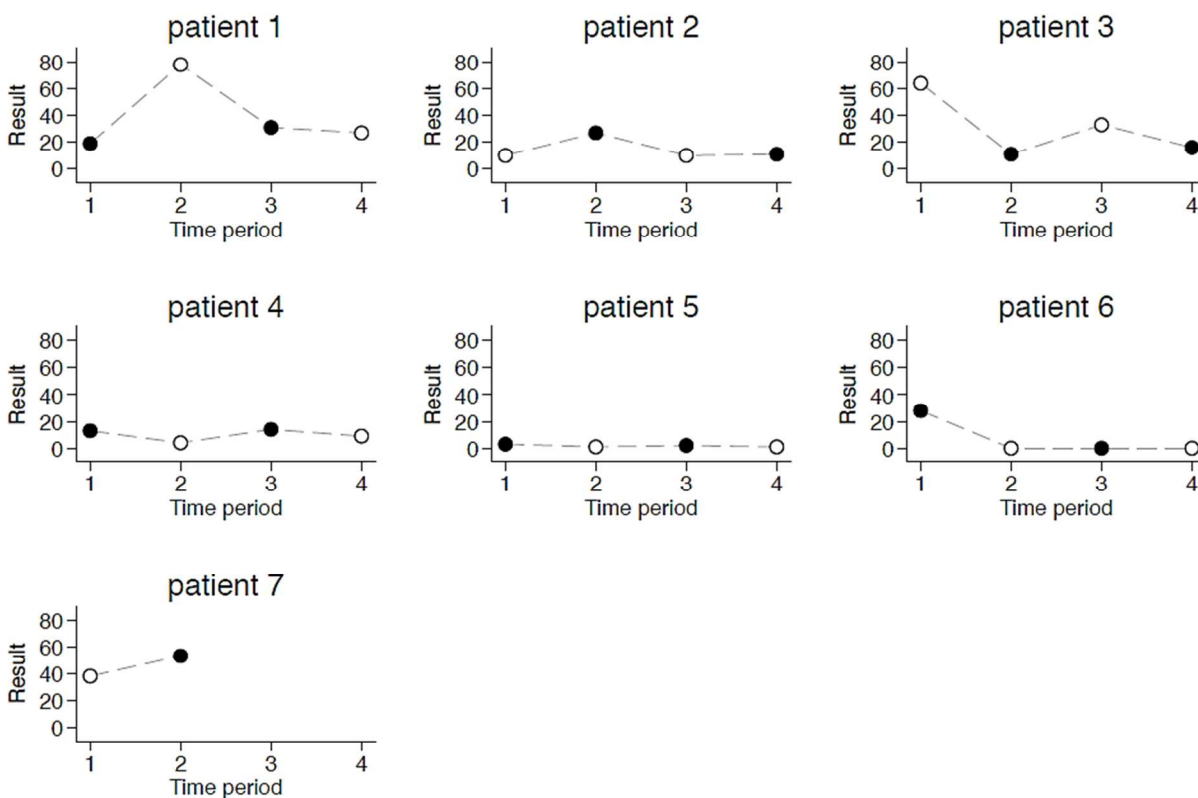

**Appendix Figure 18 Legend:** Data from this figure was extracted from the study published by Lashner et al in 1990, which investigates the effect of nicotine gum and placebo on abdominal pain in nonsmokers with ulcerative colitis. The treatment effect is -3.62 (-15.84 to 8.61) for Appendix Figure 18. White circles indicate placebo gum; black circles indicate nicotine gum.

**Appendix Figure 19: Nonsmokers with ulcerative colitis treated with nicotine gum and placebo and its effect on bowel movements per day<sup>4</sup>**

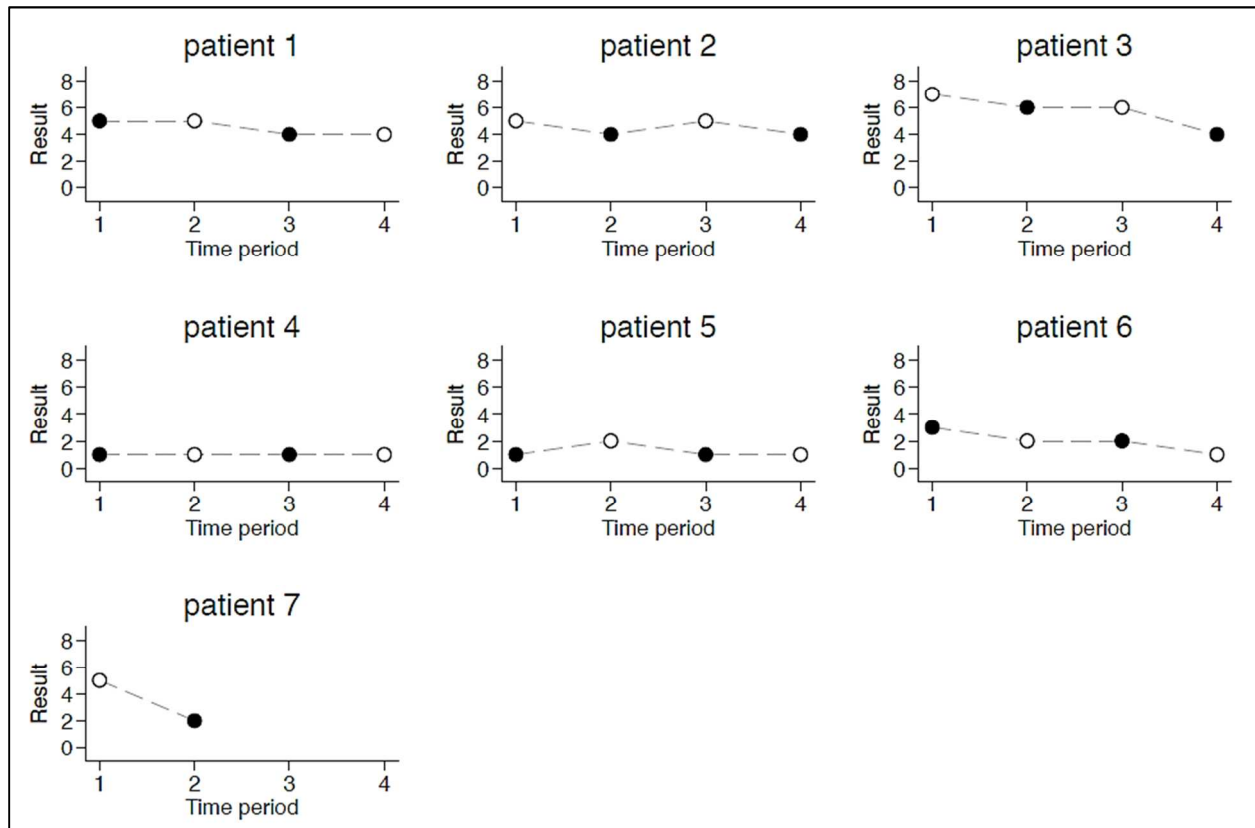

**Appendix Figure 19 Legend:** Data from this figure was extracted from the study published by Lashner et al in 1990, which investigates the effect of nicotine gum and placebo on bowel movements per day in nonsmokers with ulcerative colitis. The treatment effect is  $-0.56$  ( $-1.22$  to  $0.09$ ) for Appendix Figure 19. White circles indicate placebo gum; black circles indicate nicotine gum.

**Appendix Figure 20: Nonsmokers with ulcerative colitis treated with nicotine gum and placebo and its effect on consistency of bowel movements<sup>4</sup>**

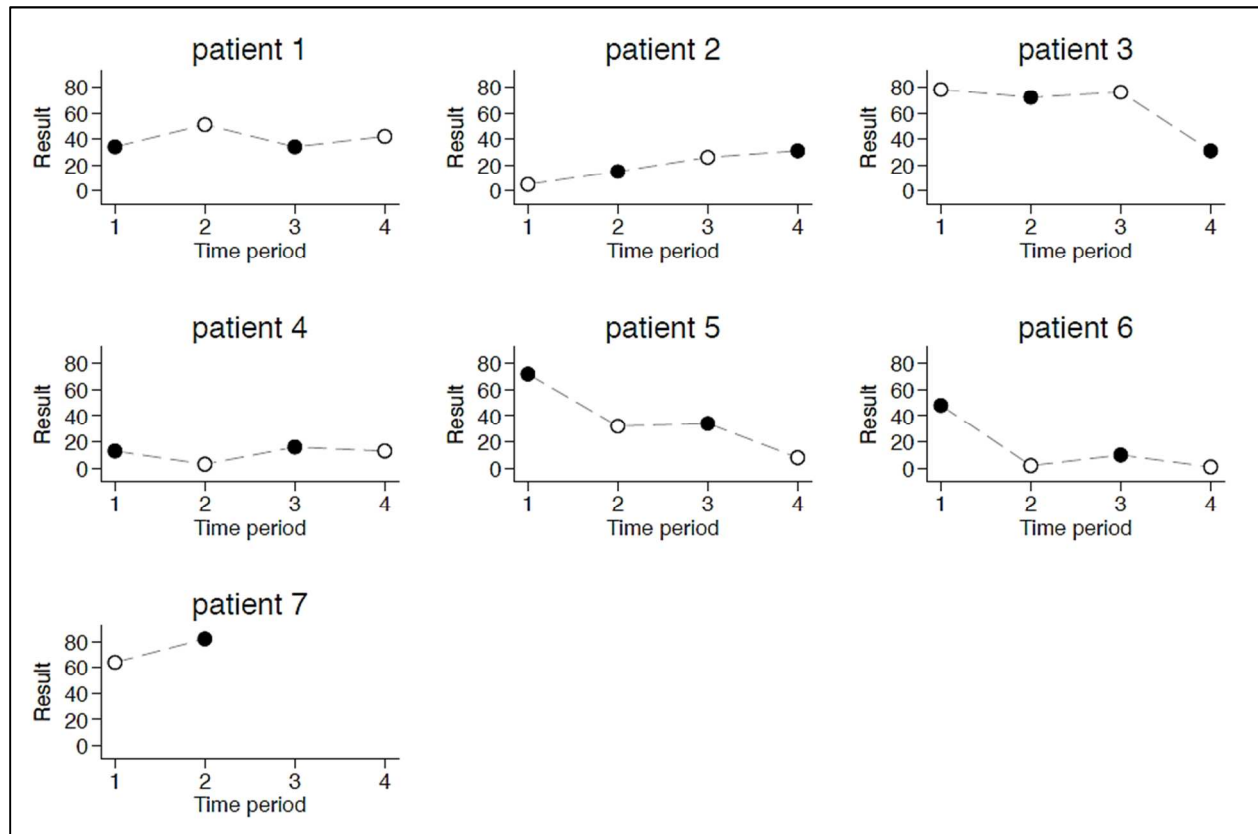

**Appendix Figure 20 Legend:** Data from this figure was extracted from the study published by Lashner et al in 1990, which investigates the effect of nicotine gum and placebo on consistency of bowel movements in nonsmokers with ulcerative colitis. The treatment effect is 7.00 (-6.29 to 20.29) for Appendix Figure 20. White circles indicate placebo gum; black circles indicate nicotine gum.

Appendix Figure 21: Nonsmokers with ulcerative colitis treated with nicotine gum and placebo and its effect on general sense of well-being<sup>4</sup>

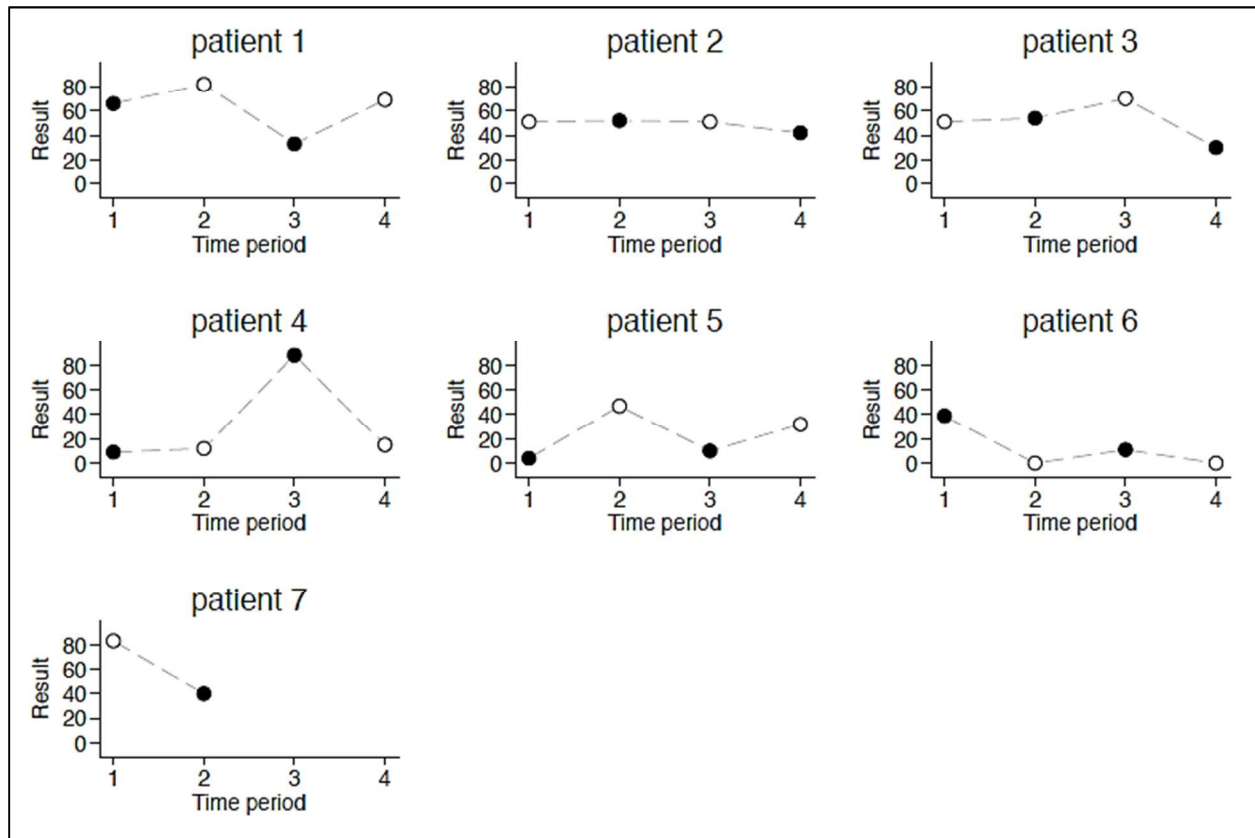

Appendix Figure 21 Legend: Data from this figure was extracted from the study published by Lashner et al in 1990, which investigates the effect of nicotine gum and placebo on general sense of well-being in nonsmokers with ulcerative colitis. The treatment effect is  $-6.54$  ( $-23.62$  to  $10.56$ ) for Appendix Figure 21. White circles indicate placebo gum; black circles indicate nicotine gum.



Appendix Figure 22: Nonsmokers with ulcerative colitis treated with nicotine gum and placebo and its effect on hematochezia<sup>4</sup>

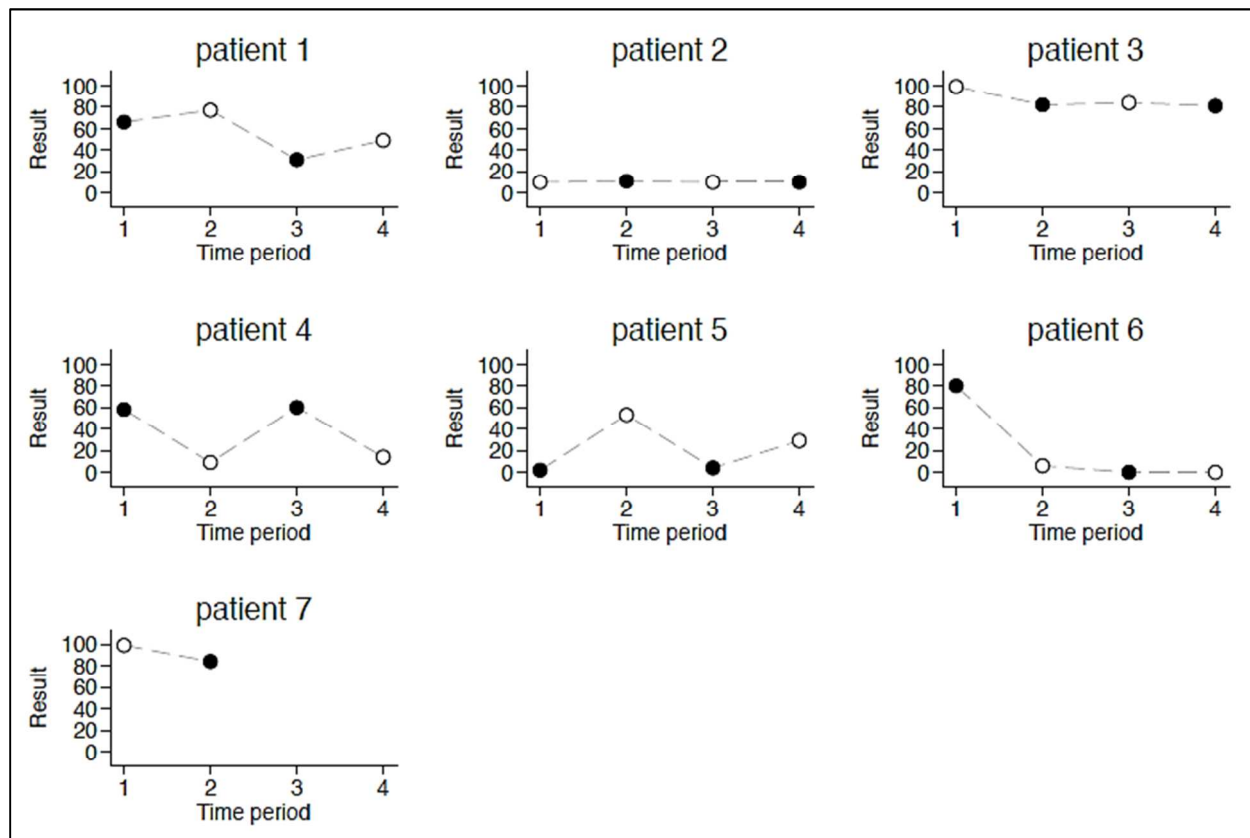

Appendix Figure 22 Legend: Data from this figure was extracted from the study published by Lashner et al in 1990, which investigates the effect of nicotine gum and placebo on hematochezia in nonsmokers with ulcerative colitis. The treatment effect is 2.35 (-17.21 to 21.90) for Appendix Figure 22. White circles indicate placebo gum; black circles indicate nicotine gum.

Appendix Figure 23: Patients with chronic depression and a diagnosis of major depression or dysthymia treated with sulpiride and placebo and its effect on anxiety<sup>5</sup>

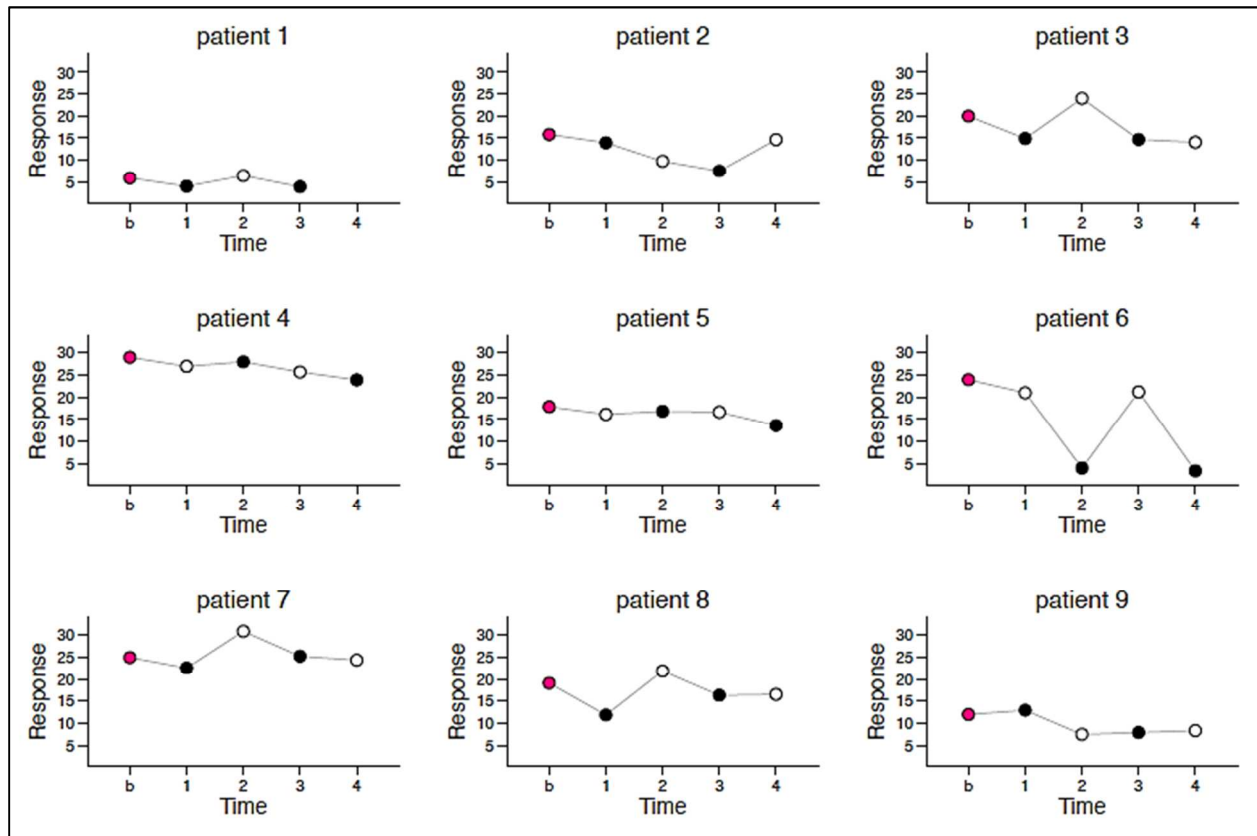

**Appendix Figure 23 Legend:** Data from this figure was extracted from the study published by Maier et al in 1994, which investigates the effect of sulpiride and placebo on anxiety in patients with chronic depression and a diagnosis of major depression or dysthymia. The treatment effect is -3.81 (-7.22 to -0.40) for Appendix Figure 23. Red circles indicate baseline; white circles indicate placebo; black circles indicate sulpiride.

**Appendix Figure 24: Patients with chronic depression and a diagnosis of major depression or dysthymia treated with sulpiride and placebo and its effect on depressed mood<sup>5</sup>**

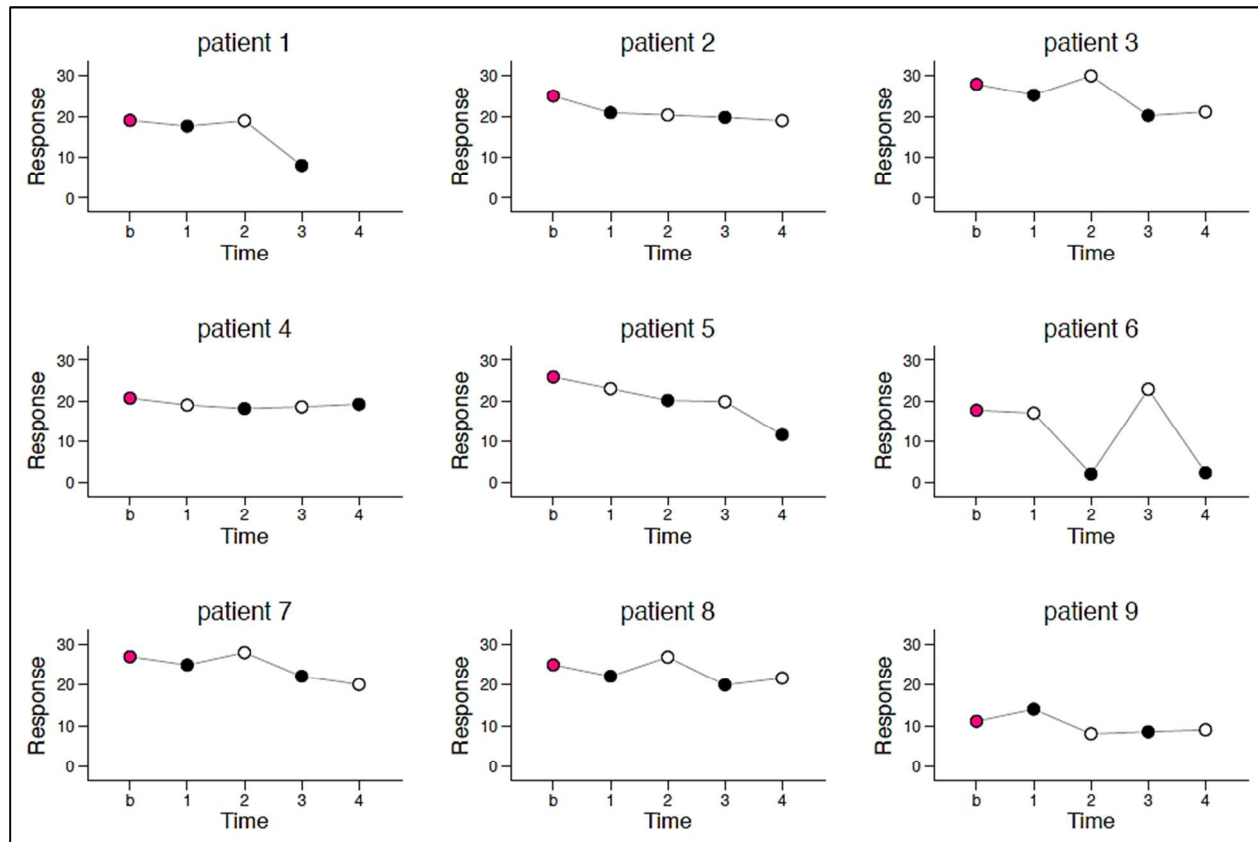

**Appendix Figure 24 Legend:** Data from this figure was extracted from the study published by Maier et al in 1994, which investigates the effect of sulpiride and placebo on depressed mood in patients with chronic depression and a diagnosis of major depression or dysthymia. The treatment effect is -3.63 (-7.40 to 0.15) for Appendix Figure 24. Red circles indicate baseline; white circles indicate placebo; black circles indicate sulpiride.

Appendix Figure 25: Patients with chronic depression and a diagnosis of major depression or dysthymia treated with sulpiride and placebo and its effect on somatization<sup>5</sup>

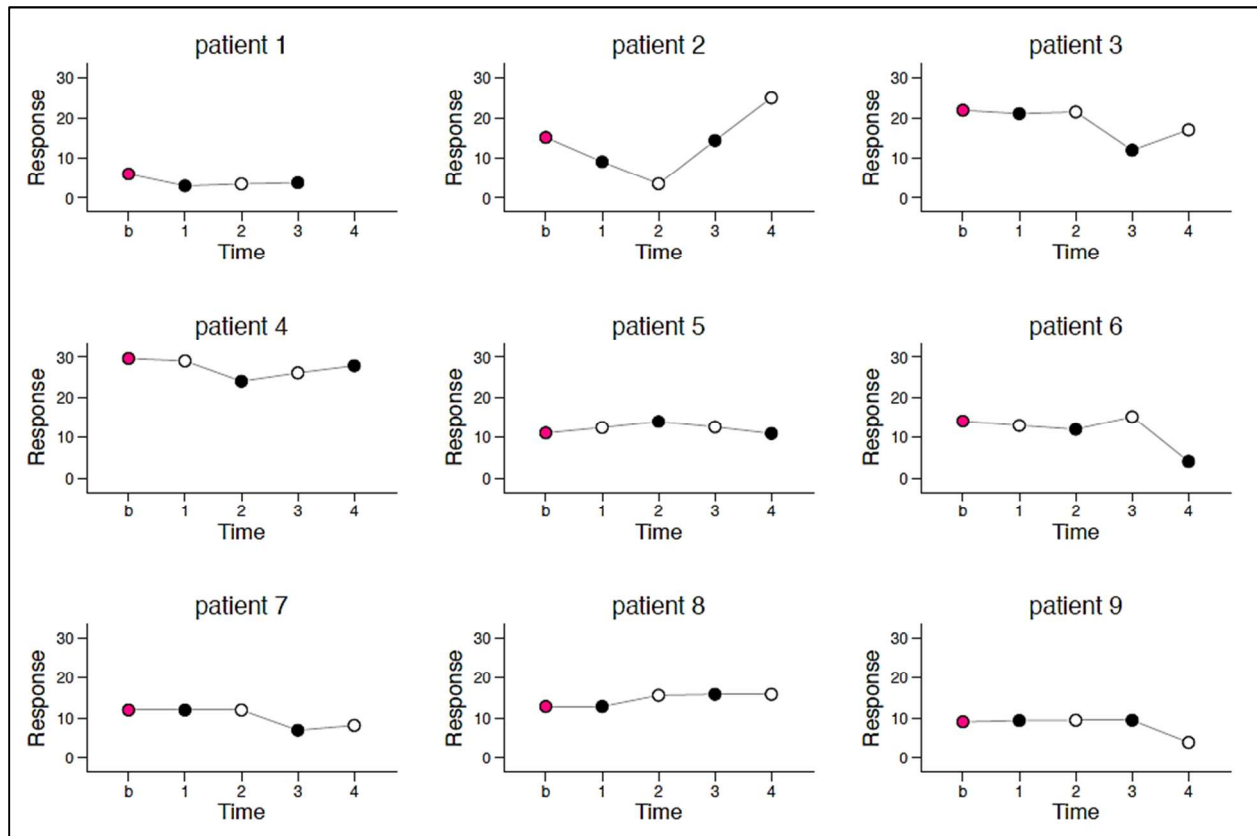

**Appendix Figure 25 Legend:** Data from this figure was extracted from the study published by Maier et al in 1994, which investigates the effect of sulpiride and placebo on somatization in patients with chronic depression and a diagnosis of major depression or dysthymia. The treatment effect is -1.50 (-4.20 to 1.21) for Appendix Figure 25. Red circles indicate baseline; white circles indicate placebo; black circles indicate sulpiride.

Appendix Figure 26: Patients with ataxia from traumatic brain injury treated with ondansetron and placebo and its effect on lower extremity ataxia<sup>6</sup>

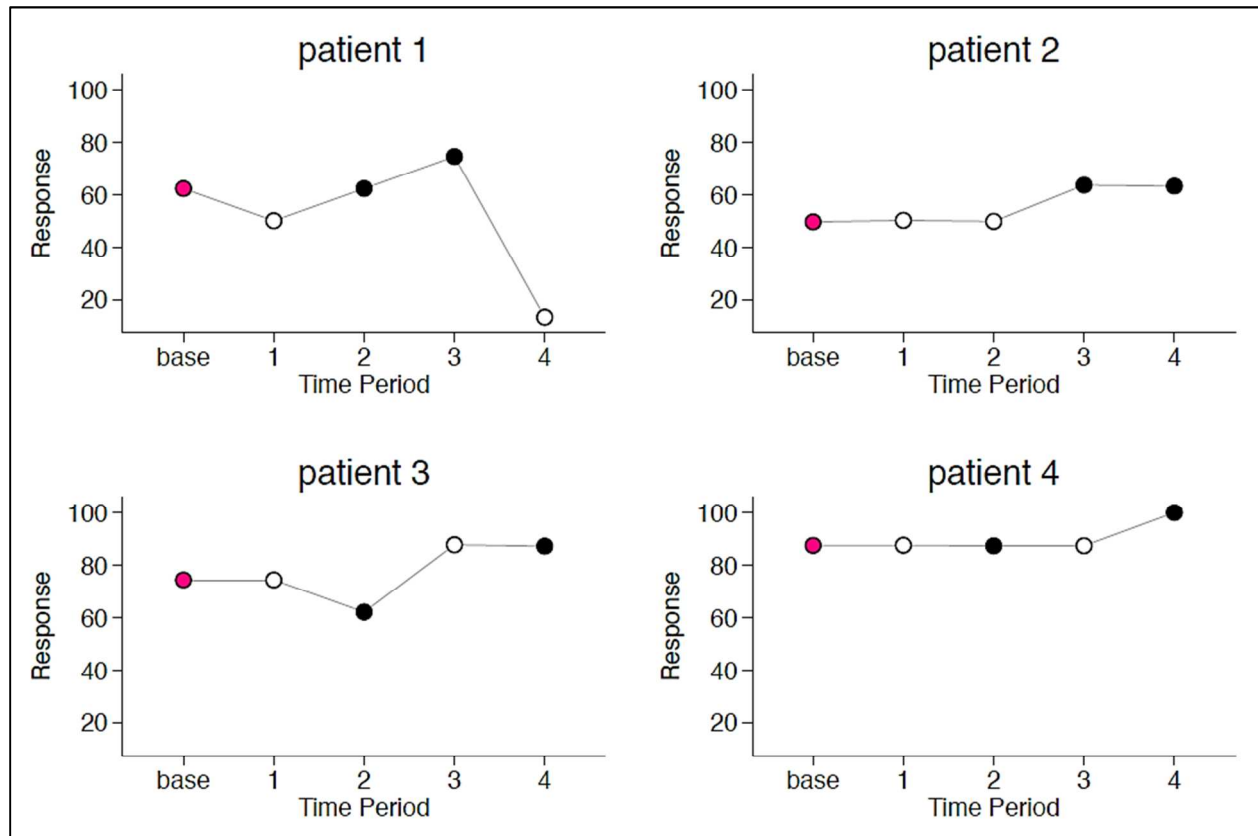

**Appendix Figure 26 Legend:** Data from this figure was extracted from the study published by Mandelcorn et al in 2004, which investigates the effect of ondansetron and placebo on lower extremity ataxia in patients with ataxia from traumatic brain injury. Each patient received the same treatment. The treatment effect is 12.49 (-0.85 to 25.84) for Appendix Figure 26. Red circles indicate baseline; white circles indicate placebo; black circles indicate ondansetron.

Appendix Figure 27: Patients with ataxia from traumatic brain injury treated with ondansetron and placebo and its effect on self-assessment score<sup>6</sup>

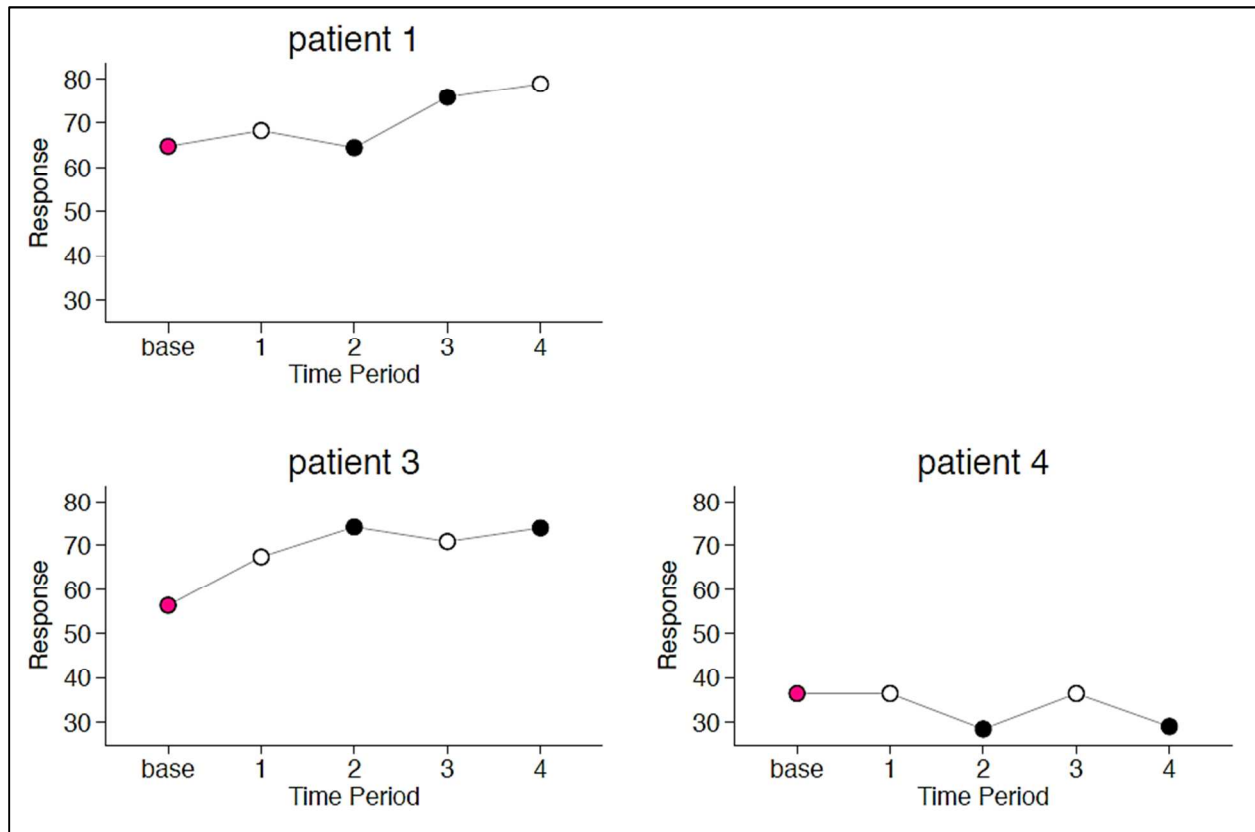

**Appendix Figure 27 Legend:** Data from this figure was extracted from the study published by Mandelcorn et al in 2004, which investigates the effect of ondansetron and placebo on self-assessment score in patients with ataxia from traumatic brain injury. The treatment effect is -2.05 (-8.43 to 4.33) for Appendix Figure 27. Red circles indicate baseline; white circles indicate placebo; black circles indicate ondansetron.

**Appendix Figure 28: Patients with ataxia from traumatic brain injury treated with ondansetron and placebo and its effect on truncal ataxia<sup>6</sup>**

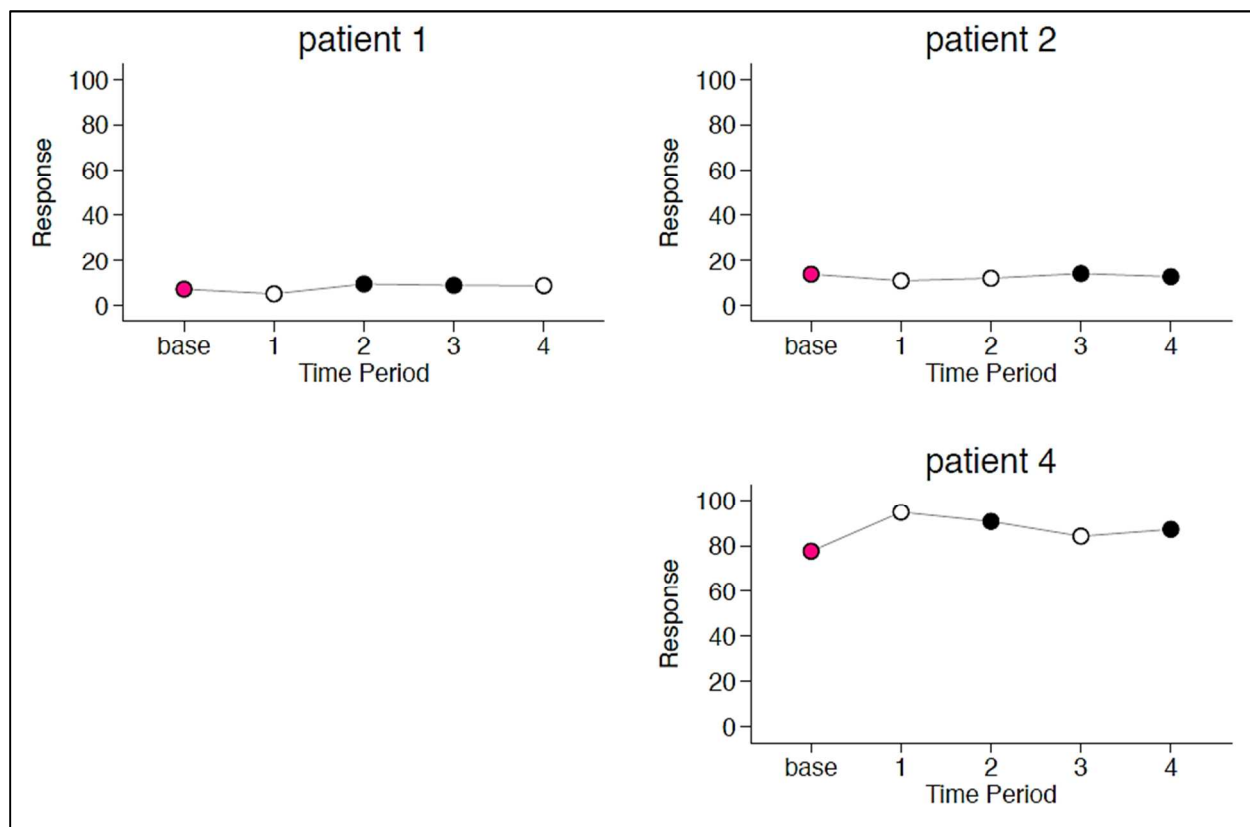

**Appendix Figure 28 Legend:** Data from this figure was extracted from the study published by Mandelcorn et al in 2004, which investigates the effect of ondansetron and placebo on truncal ataxia in patients with ataxia from traumatic brain injury. The treatment effect is 1.20 (-2.06 to 4.45) for Appendix Figure 28. Red circles indicate baseline; white circles indicate placebo; black circles indicate ondansetron.

**Appendix Figure 29: Patients with ataxia from traumatic brain injury treated with ondansetron and placebo and its effect on upper extremity ataxia<sup>6</sup>**

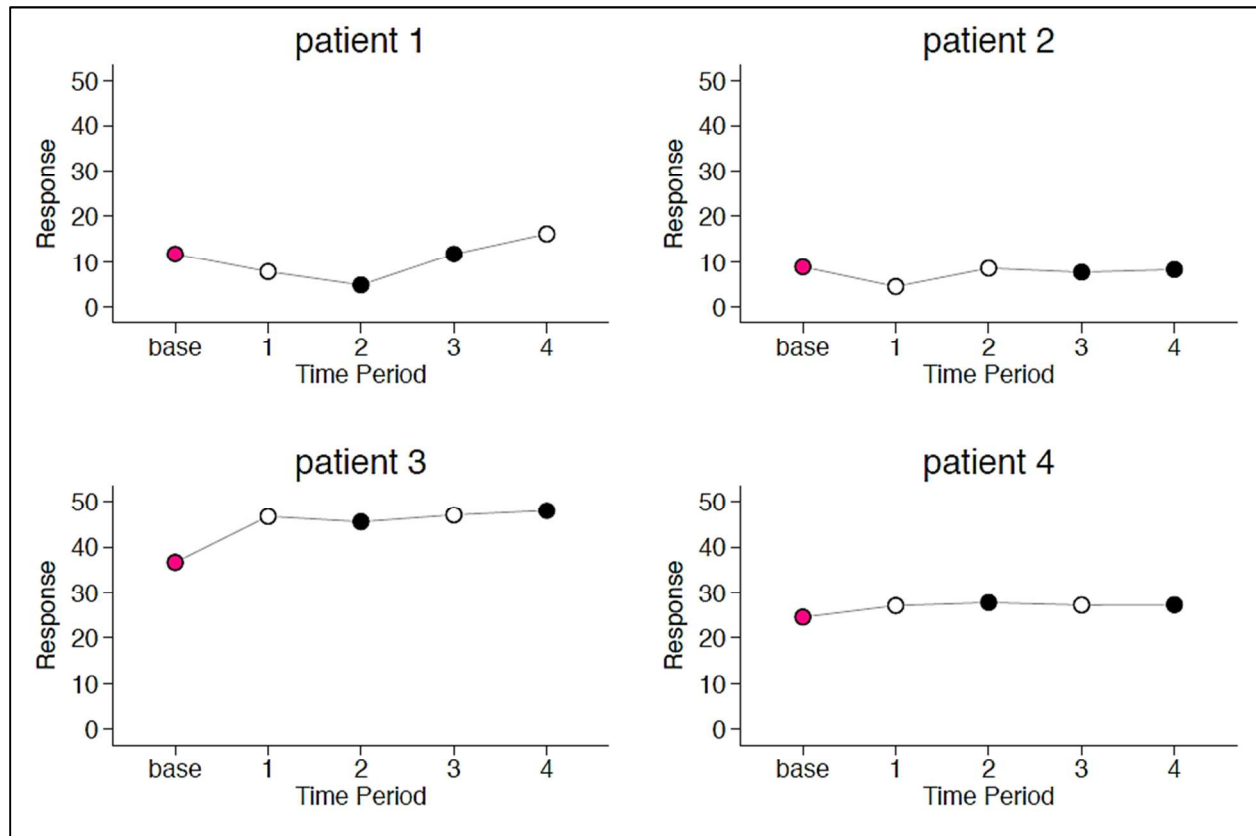

**Appendix Figure 29 Legend:** Data from this figure was extracted from the study published by Mandelcorn et al in 2004, which investigates the effect of ondansetron and placebo on upper extremity ataxia in patients with ataxia from traumatic brain injury. The treatment effect is  $-0.50$  ( $-3.10$  to  $2.10$ ) for Appendix Figure 29. Red circles indicate baseline; white circles indicate placebo; black circles indicate ondansetron.



### Appendix Figure 30: Patients with chronic neuropathic pain treated with oral dextromethorphan and placebo and its effect on VAS pain intensity<sup>7</sup>

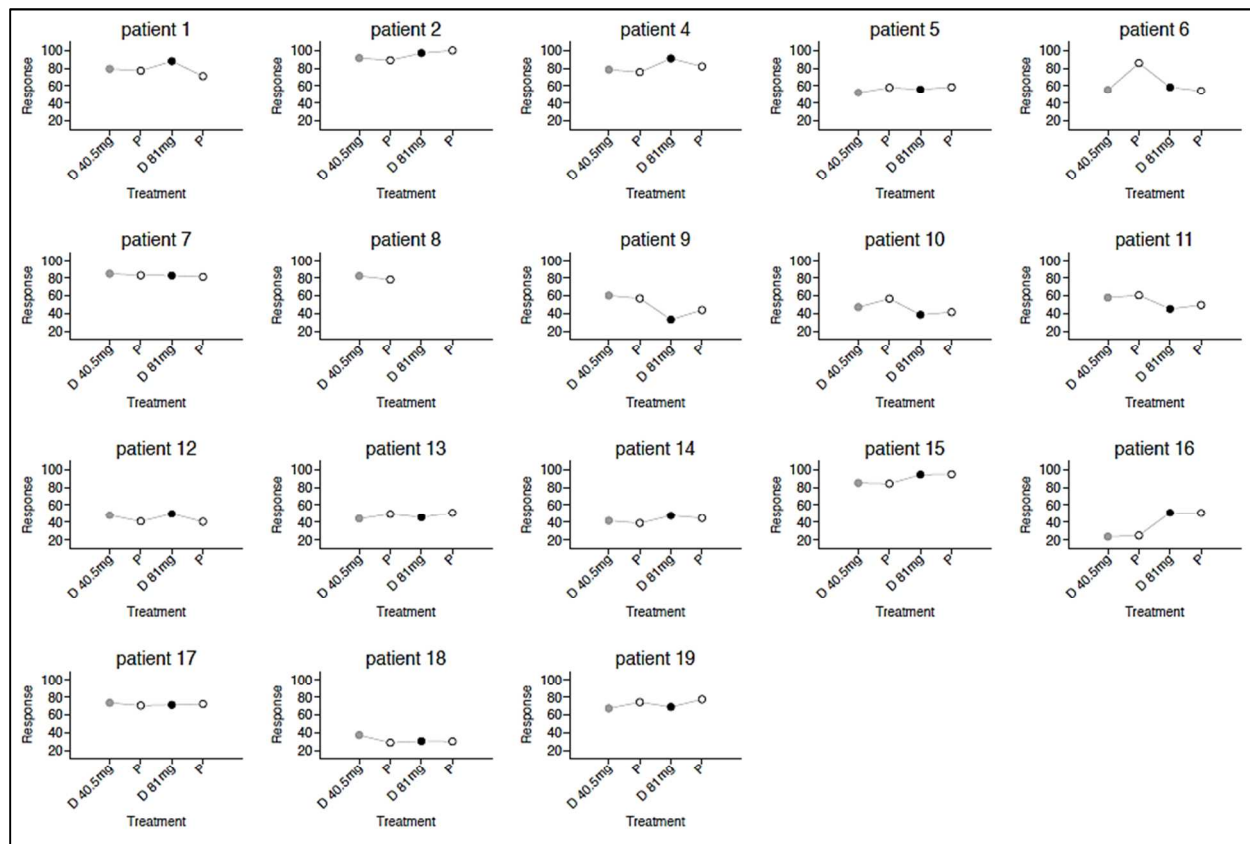

**Appendix Figure 30 Legend:** Data from this figure was extracted from the study published by McQuay et al in 1994, which investigates the effect of oral dextromethorphan and placebo on VAS pain intensity in patients with chronic neuropathic pain. The treatment effect is  $-1.06$  ( $-5.16$  to  $3.04$ ) for Appendix Figure 30. Grey circles indicate dextromethorphan 40.5 mg daily; black circles indicate dextromethorphan 81 mg daily; white circles indicate placebo.

**Appendix Figure 31: Patients with chronic neuropathic pain treated with oral dextromethorphan and placebo and its effect on VAS relief intensity<sup>7</sup>**

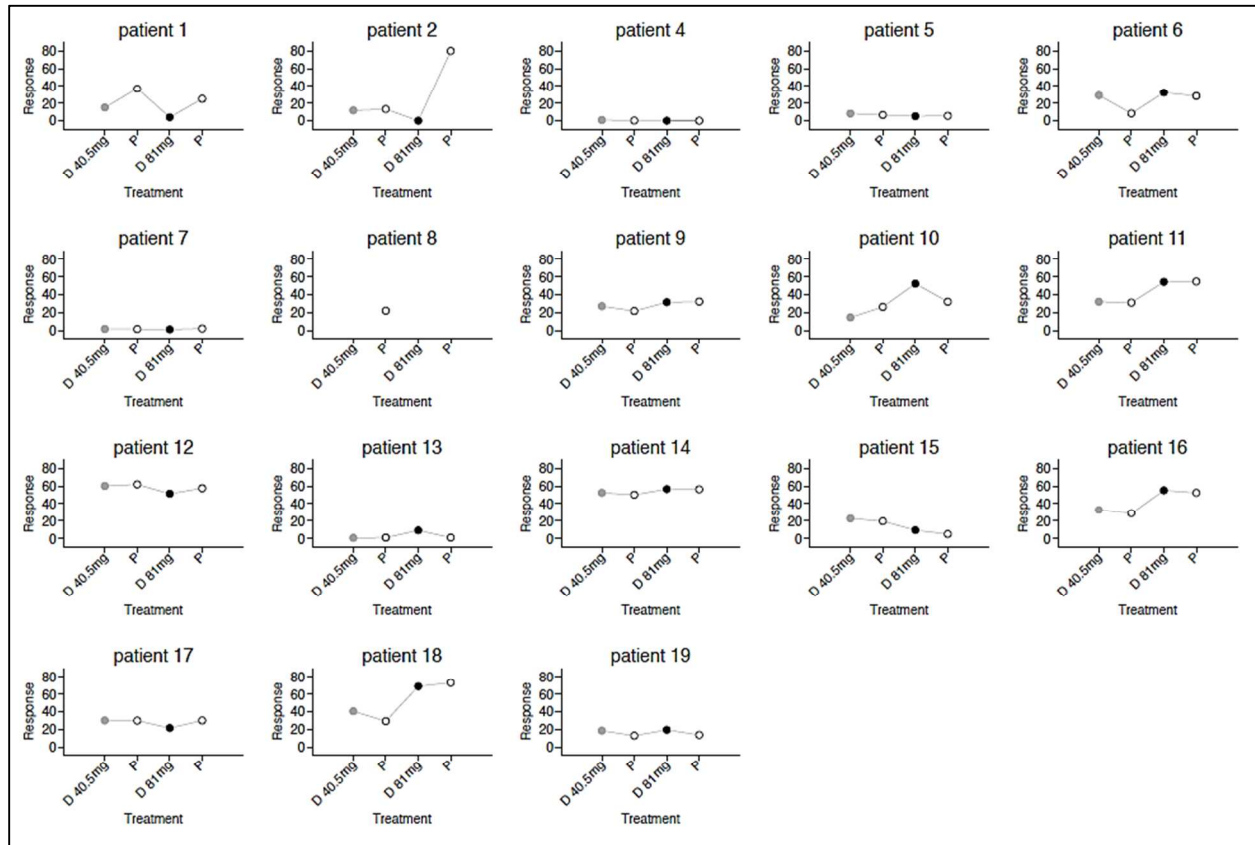

**Appendix Figure 31 Legend:** Data from this figure was extracted from the study published by McQuay et al in 1994, which investigates the effect of oral dextromethorphan and placebo on VAS relief intensity in patients with chronic neuropathic pain. The treatment effect is -3.86 (-11.11 to 3.40) for Appendix Figure 31. Grey circles indicate dextromethorphan 40.5 mg daily; black circles indicate dextromethorphan 81 mg daily; white circles indicate placebo.

**Appendix Figure 32: Patients with unstable angina at rest treated with continuous and intermittent injection of isosorbide dinitrate and its effect on incidence of angina<sup>8</sup>**

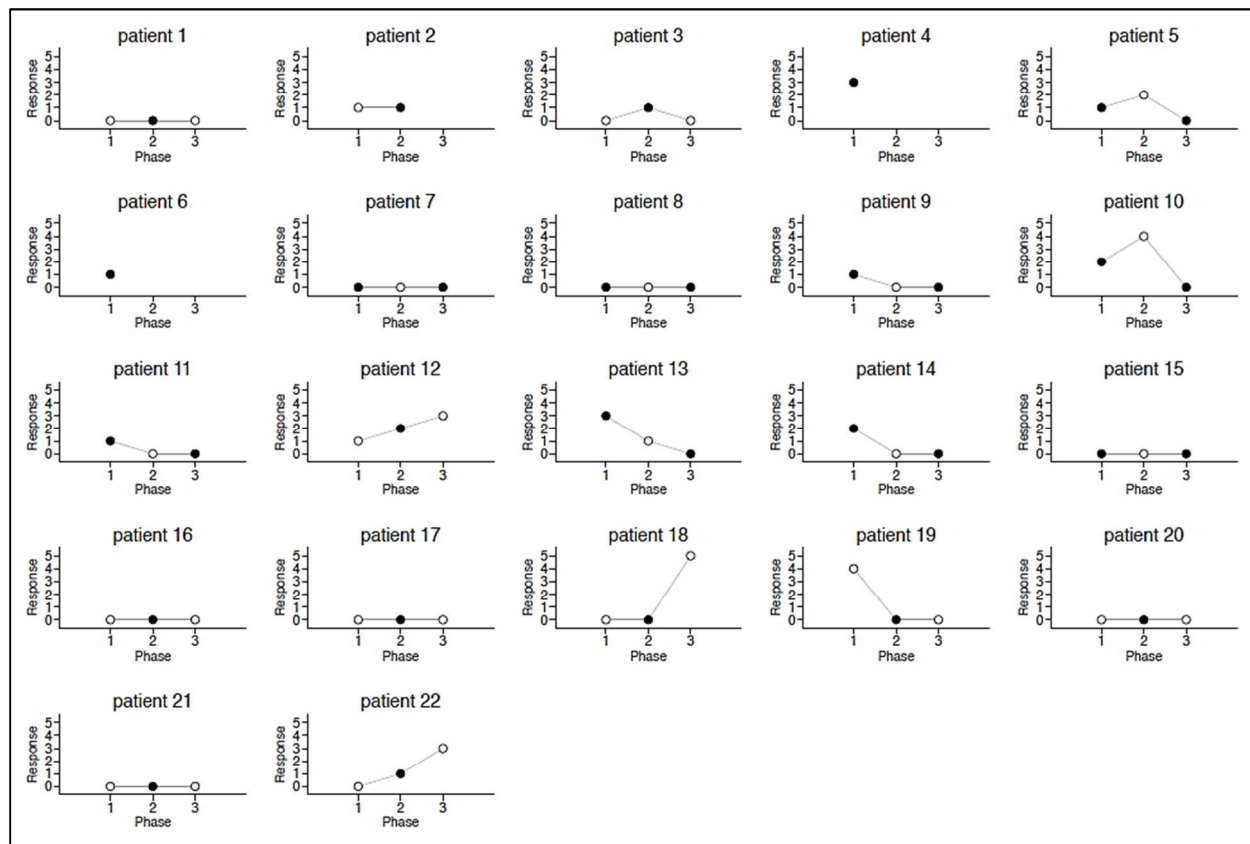

**Appendix Figure 32 Legend:** Data from this figure was extracted from the study published by Miyazaki et al in 1995, which investigates the effect of continuous and intermittent injection of isosorbide dinitrate on incidence of angina in patients with unstable angina. The treatment effect is 0.47 (-0.32 to 1.26) for Appendix Figure 32. White circles indicate continuous injection; black circles indicate intermittent injection.

Appendix Figure 33: Children with brain tumors receiving highly emetogenic therapy treated with ondansetron/metopimazine and ondansetron monotherapy and its effect on emetic episodes per day<sup>9</sup>

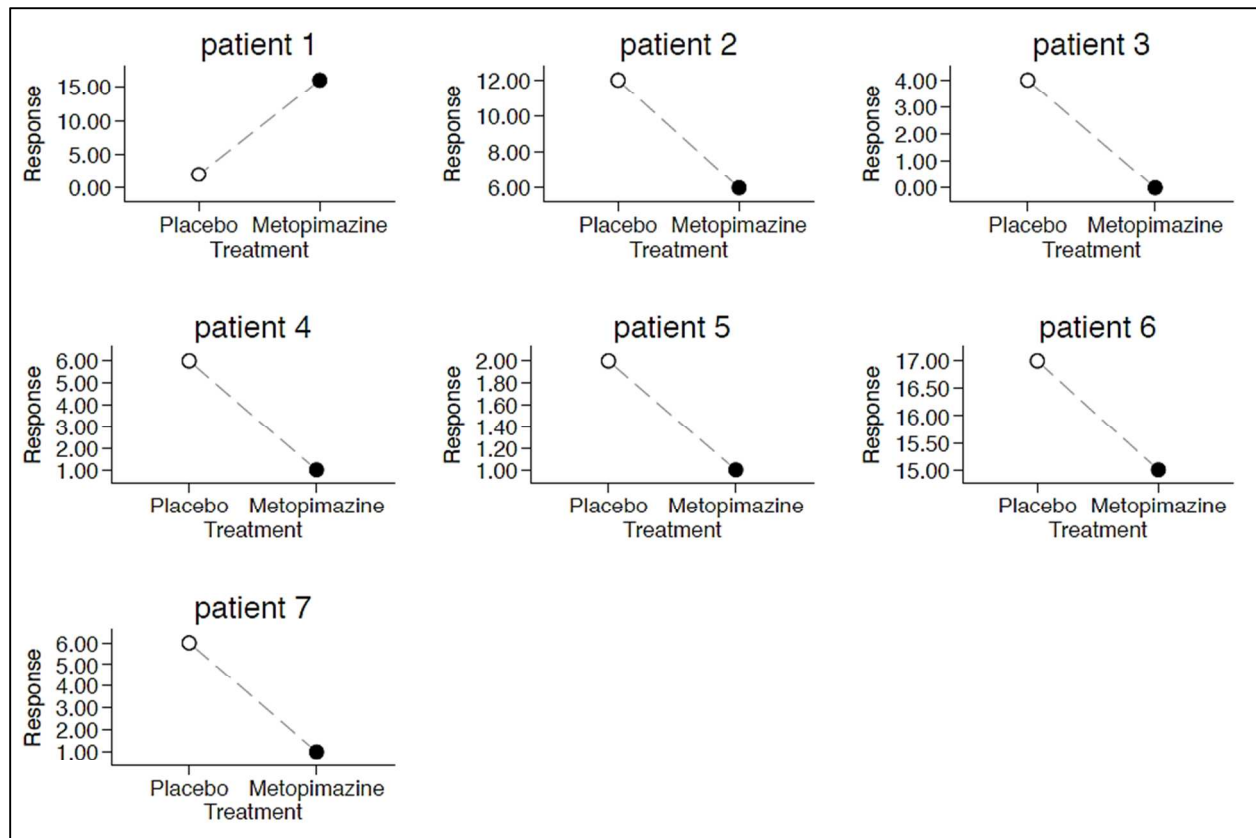

**Appendix Figure 33 Legend:** Data from this figure was extracted from the study published by Nathan et al in 2006, which investigates the effect of ondansetron/metopimazine and ondansetron monotherapy on emetic episodes per day in children with brain tumors receiving highly emetogenic therapy. The treatment effect is -0.56 (-1.74 to 0.62) for Appendix Figure 33. White circles indicate placebo; black circles indicate metopimazine.

**Appendix Figure 34: Patients with unstable angina at rest treated with oral verapamil and placebo and its effect on ischemic attacks<sup>10</sup>**

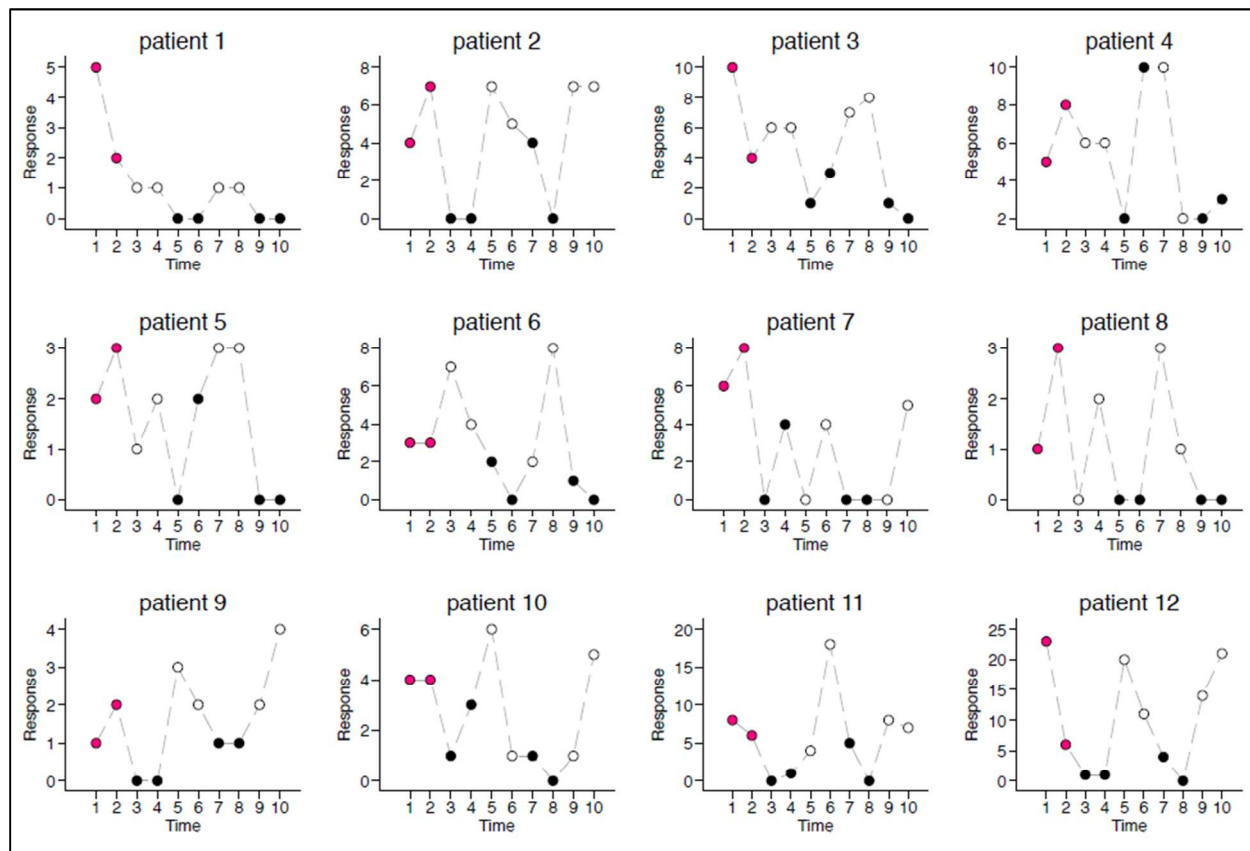

**Appendix Figure 34 Legend:** Data from this figure was extracted from the study published by Parodi et al in 1979, which investigates the effect of oral verapamil and placebo on ischemic attacks in patients with unstable angina. The treatment effect is  $-1.63$  ( $-2.10$  to  $-1.17$ ) for Appendix Figure 34. Red circles indicate baseline; white circles indicate placebo; black circles indicate verapamil.

**Appendix Figure 35: Patients with unstable angina at rest treated with verapamil, propranolol and placebo and its effect on asymptomatic ST depression<sup>11</sup>**

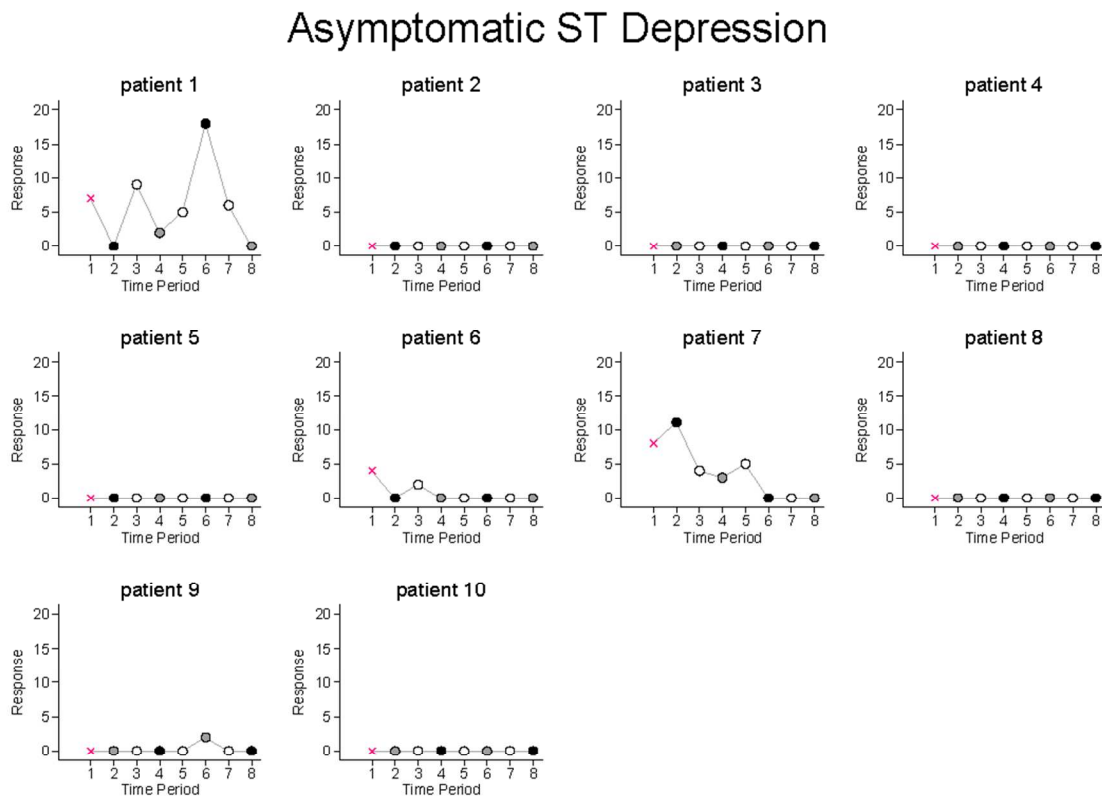

**Appendix Figure 35 Legend:** Data from this figure was extracted from the study published by Parodi et al in 1986, which investigates the effect of verapamil, propranolol and placebo on asymptomatic ST depression in patients with unstable angina. The treatment effect is  $-0.82$  ( $-2.54$  to  $0.90$ ) for Appendix Figure 35. Red Xs indicate baseline; white circles indicate placebo; grey circles indicate propranolol; black circles indicate verapamil.

**Appendix Figure 36: Patients with unstable angina at rest treated with verapamil, propranolol and placebo and its effect on asymptomatic ST elevation<sup>11</sup>**

## Asymptomatic ST Elevation

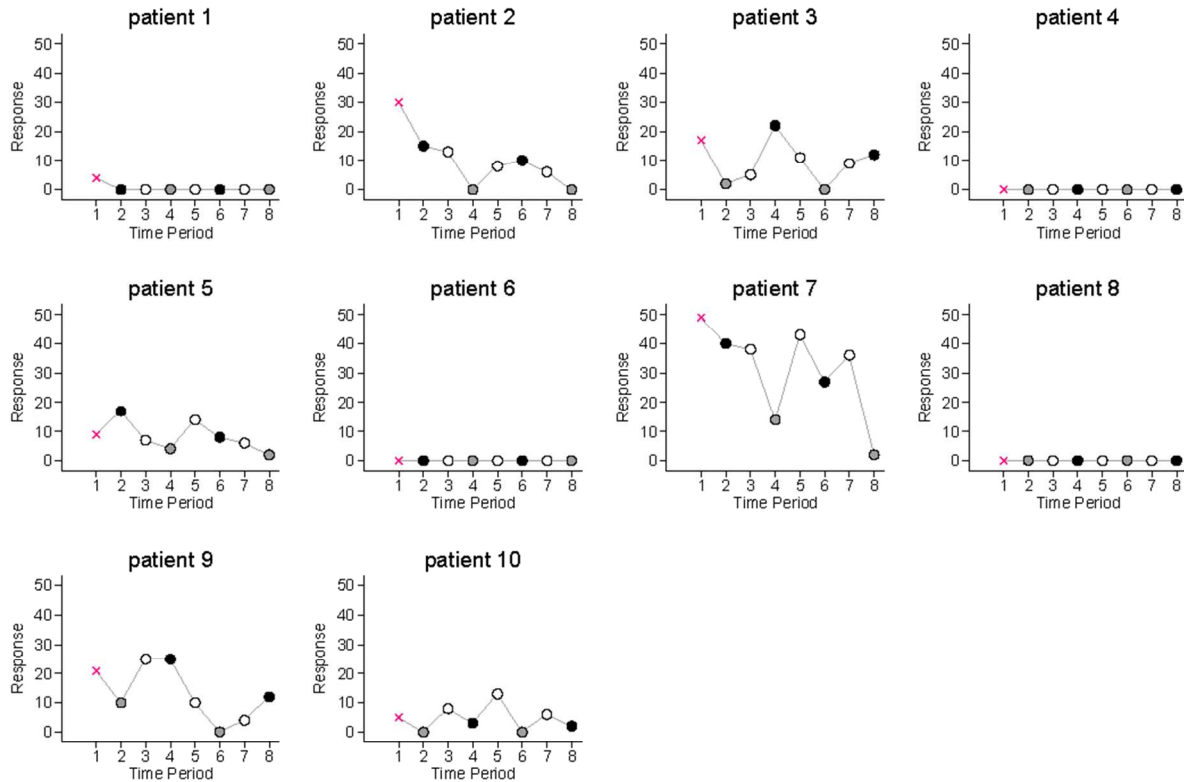

**Appendix Figure 36 Legend:** Data from this figure was extracted from the study published by Parodi et al in 1986, which investigates the effect of verapamil, propranolol and placebo on asymptomatic ST elevation in patients with unstable angina. The treatment effect is -1.97 (-2.92 to -1.01) for Appendix Figure 36. Red Xs indicate baseline; white circles indicate placebo; grey circles indicate propranolol; black circles indicate verapamil.

**Appendix Figure 37: Patients with unstable angina at rest treated with verapamil, propranolol and placebo and its effect on symptomatic ST depression<sup>11</sup>**

## Symptomatic ST Depression

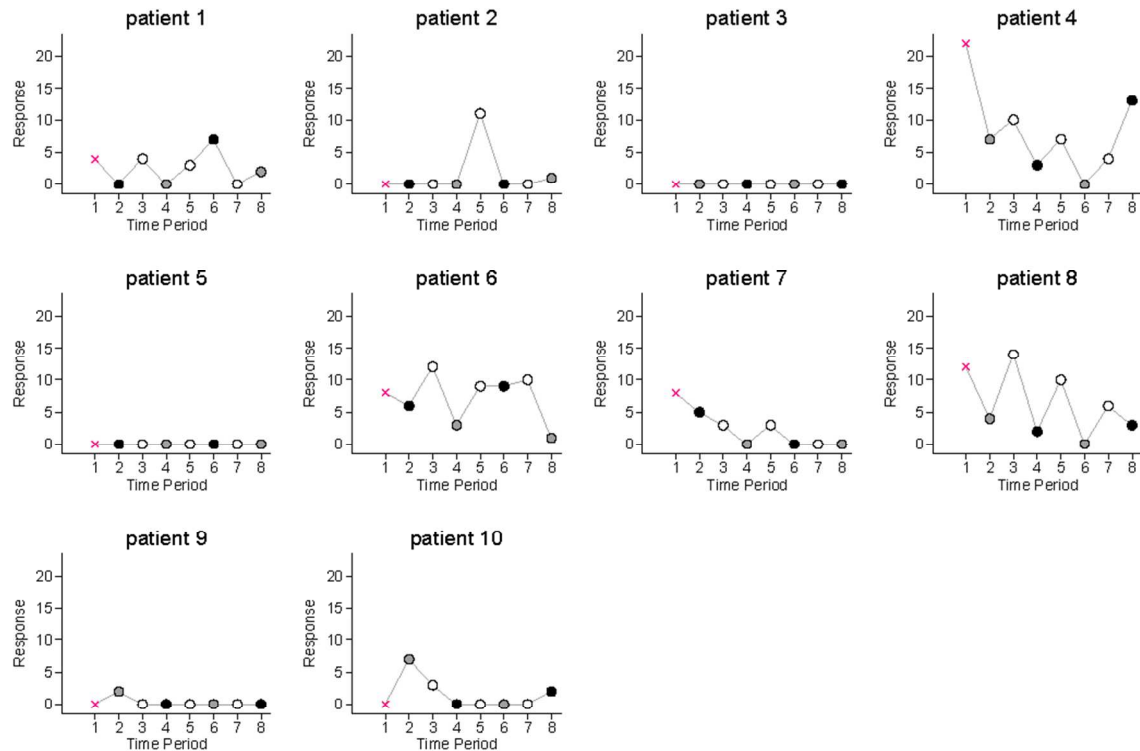

**Appendix Figure 37 Legend:** Data from this figure was extracted from the study published by Parodi et al in 1986, which investigates the effect of verapamil, propranolol and placebo on symptomatic ST depression in patients with unstable angina. The treatment effect is  $-0.98$  ( $-1.84$  to  $-0.13$ ) for Appendix Figure 37. Red Xs indicate baseline; white circles indicate placebo; grey circles indicate propranolol; black circles indicate verapamil.



**Appendix Figure 38: Patients with unstable angina at rest treated with verapamil, propranolol and placebo and its effect on symptomatic ST elevation<sup>11</sup>**

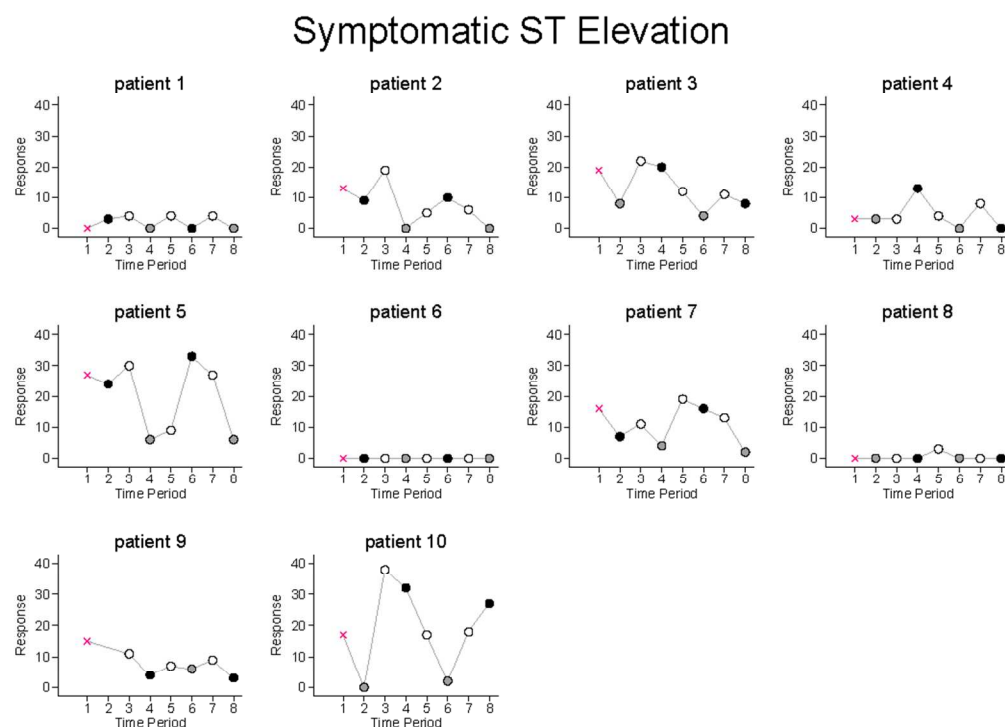

**Appendix Figure 38 Legend:** Data from this figure was extracted from the study published by Parodi et al in 1986, which investigates the effect of verapamil, propranolol and placebo on symptomatic ST elevation in patients with unstable angina. The treatment effect is  $-1.87$  ( $-2.72$  to  $-1.02$ ) for Appendix Figure 38. Red Xs indicate baseline; white circles indicate placebo; grey circles indicate propranolol; black circles indicate verapamil.

**Appendix Figure 39: Patients previously taking warfarin for either atrial fibrillation or deep vein thrombosis treated with apo-warfarin and coumadin and its effect on international normalized ratio<sup>12</sup>**

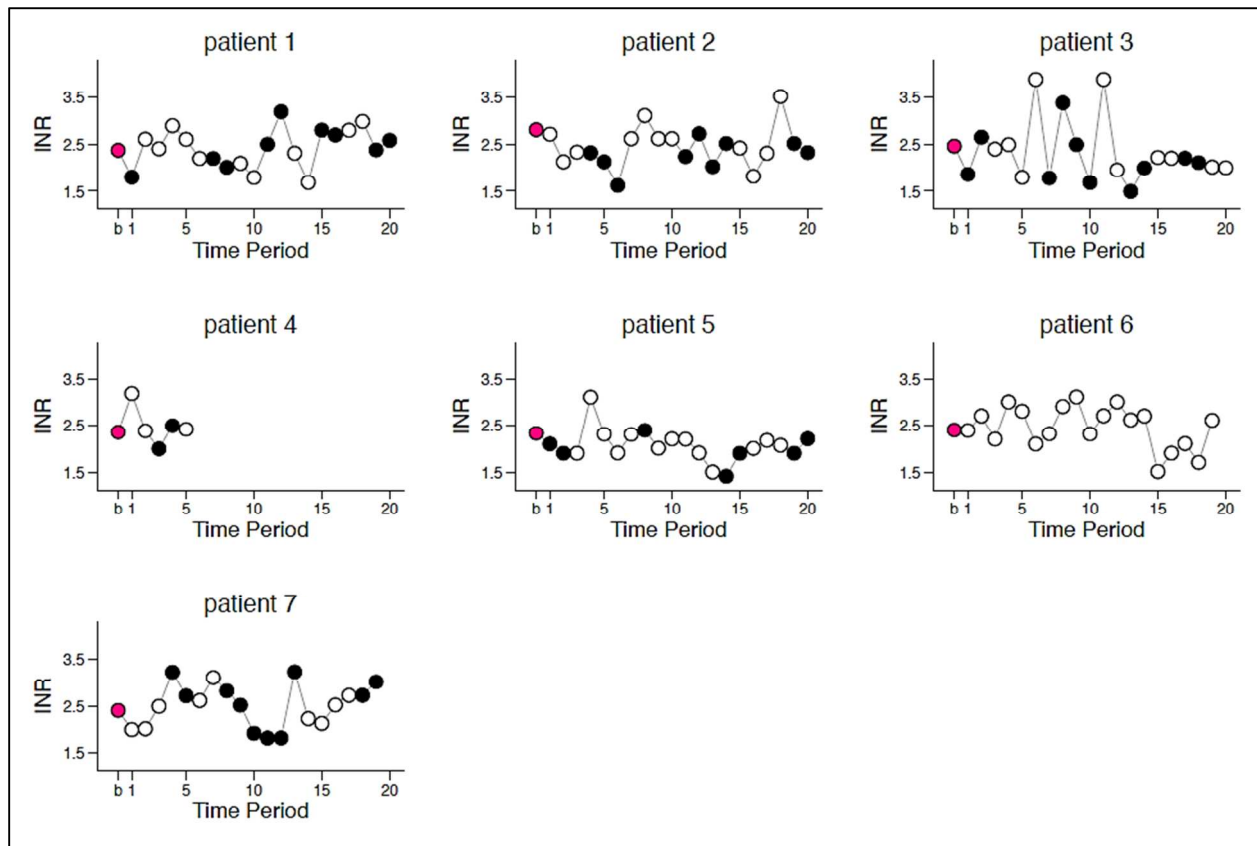

**Appendix Figure 39 Legend:** Data from this figure was extracted from the study published by Pereira et al in 1995, which investigates the effect of apo-warfarin and coumadin on international normalized ratio in patients previously taking warfarin for either atrial fibrillation or deep vein thrombosis. The treatment effect is  $-0.12$  ( $-0.30$  to  $0.07$ ) for Appendix Figure 39. Red circles indicate baseline; white circles indicate Coumadin; black circles indicate apo-warfarin.

**Appendix Figure 40: Parkinson's disease patients with troublesome dyskinesia treated with simvastatin and placebo and its effect on discomfort caused by troublesome dyskinesia<sup>13</sup>**

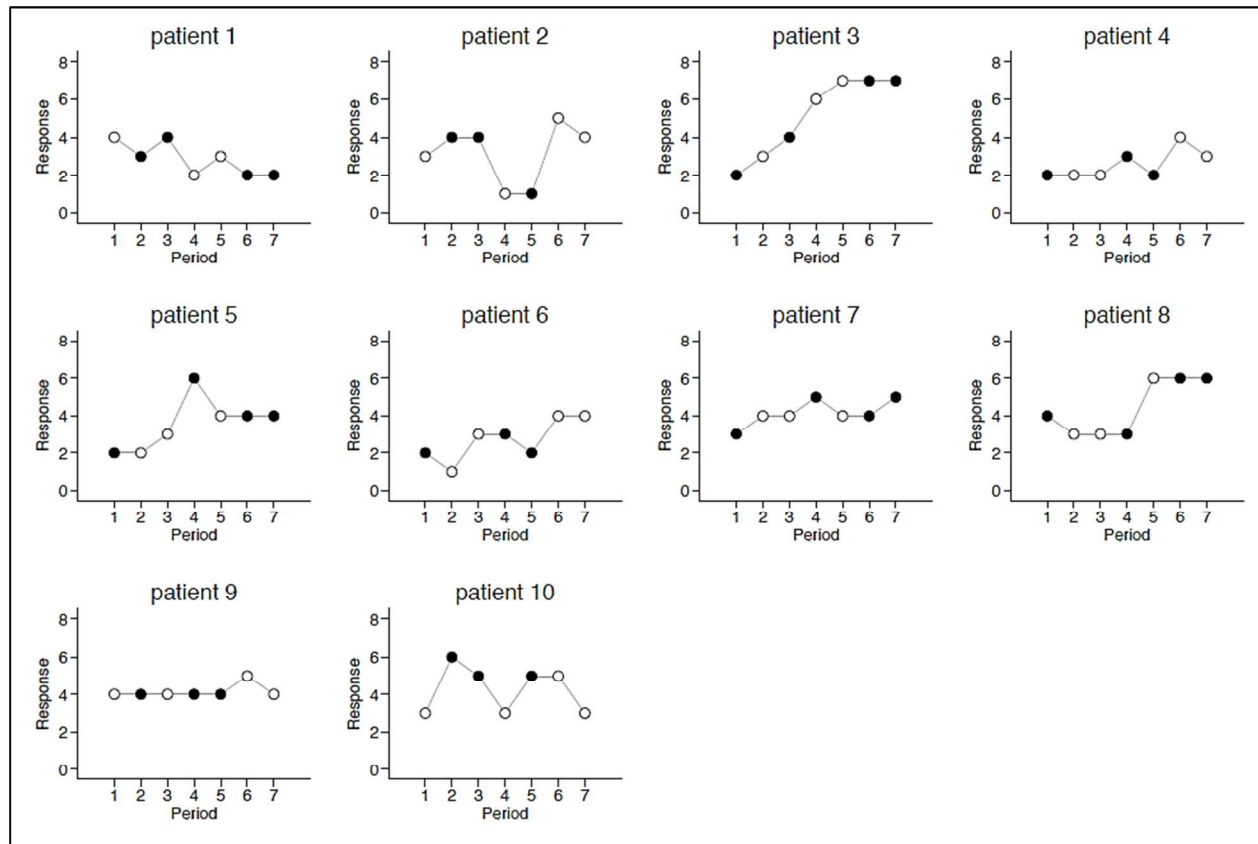

**Appendix Figure 40 Legend:** Data from this figure was extracted from the study published by Tison et al in 2012, which investigates the effect of simvastatin and placebo on discomfort caused by troublesome dyskinesia in Parkinson's disease patients with troublesome dyskinesia. The treatment effect is 0.20 (-0.40 to 0.80) for Appendix Figure 40. White circles indicate placebo; black circles indicate simvastatin.

## Appendix Reference List

- (1) Camfield P, Gordon K, Dooley J, Camfield C. Melatonin appears ineffective in children with intellectual deficits and fragmented sleep: six "N of 1" trials. *J Child Neurol* 1996; 11(4):341-343.
- (2) Hinderer SR. The supraspinal anxiolytic effect of baclofen for spasticity reduction. *Am J Phys Med Rehabil* 1990; 69(5):254-258.
- (3) Langer JC, Winthrop AL, Issenman RM. The single-subject randomized trial. A useful clinical tool for assessing therapeutic efficacy in pediatric practice. *Clin Pediatr (Phila)* 1993; 32(11):654-657.
- (4) Lashner BA, Hanauer SB, Silverstein MD. Testing nicotine gum for ulcerative colitis patients. Experience with single-patient trials. *Dig Dis Sci* 1990; 35(7):827-832.
- (5) Maier W, Benkert O. Treatment of chronic depression with sulpiride: evidence of efficacy in placebo-controlled single case studies. *Psychopharmacology (Berl)* 1994; 115(4):495-501.
- (6) Mandelcorn J, Cullen NK, Bayley MT. A preliminary study of the efficacy of ondansetron in the treatment of ataxia, poor balance and incoordination from brain injury. *Brain Inj* 2004; 18(10):1025-1039.
- (7) McQuay HJ, Carroll D, Jadad AR, Glynn CJ, Jack T, Moore RA et al. Dextromethorphan for the treatment of neuropathic pain: a double-blind randomised controlled crossover trial with integral n-of-1 design. *Pain* 1994; 59(1):127-133.
- (8) Miyazaki S, Nonogi H, Goto Y, Sumiyoshi T, Haze K, Hiramori K. Comparison of the therapeutic efficacy of continuous and intermittent injection of isosorbide dinitrate: a randomized study on unstable angina. *Intern Med* 1995; 34(9):856-862.
- (9) Nathan PC, Tomlinson G, Dupuis LL, Greenberg ML, Ota S, Bartels U et al. A pilot study of ondansetron plus metopimazine vs. ondansetron monotherapy in children receiving highly emetogenic chemotherapy: a Bayesian randomized serial N-of-1 trials design. *Support Care Cancer* 2006; 14(3):268-276.
- (10) Parodi O, Maseri A, Simonetti I. Management of unstable angina at rest by verapamil. A double-blind cross-over study in coronary care unit. *Br Heart J* 1979; 41(2):167-174.
- (11) Parodi O, Simonetti I, Michelassi C, Carpeggiani C, Biagini A, L'Abbate A et al. Comparison of verapamil and propranolol therapy for angina pectoris at rest: a randomized, multiple-crossover, controlled trial in the coronary care unit. *Am J Cardiol* 1986; 57(11):899-906.
- (12) Pereira JA, Holbrook AM, Dolovich L, Goldsmith C, Thabane L, Douketis JD et al. Are brand-name and generic warfarin interchangeable? Multiple n-of-1 randomized, crossover trials. *Ann Pharmacother* 2005; 39(7-8):1188-1193.
- (13) Tison F, Negre-Pages L, Meissner WG, Dupouy S, Li Q, Thiolat ML et al. Simvastatin decreases levodopa-induced dyskinesia in monkeys, but not in a randomized, placebo-controlled, multiple

- 1  
2  
3 cross-over ("n-of-1") exploratory trial of simvastatin against levodopa-induced dyskinesia in  
4 Parkinson's disease patients. *Parkinsonism Relat Disord* 2013; 19(4):416-421.  
5  
6  
7 (14) Emmanuel AV, Kamm MA, Roy AJ, Kerstens R, Vandeplassche L. Randomised clinical trial: the  
8 efficacy of prucalopride in patients with chronic intestinal pseudo-obstruction--a double-blind,  
9 placebo-controlled, cross-over, multiple n = 1 study. *Aliment Pharmacol Ther* 2012; 35(1):48-55.  
10  
11 (15) Haas DC, Sheehe PR. Dextroamphetamine pilot crossover trials and n of 1 trials in patients with  
12 chronic tension-type and migraine headache. *Headache* 2004; 44(10):1029-1037.  
13  
14 (16) Jaeschke R, Adachi J, Guyatt G, Keller J, Wong B. Clinical usefulness of amitriptyline in  
15 fibromyalgia: the results of 23 N-of-1 randomized controlled trials. *J Rheumatol* 1991; 18(3):447-  
16 451.  
17  
18 (17) Johannessen T, Petersen H, Kristensen P, Fosstvedt D, Kleveland PM, Dybdahl J et al. Cimetidine  
19 on-demand in dyspepsia. Experience with randomized controlled single-subject trials. *Scand J*  
20 *Gastroenterol* 1992; 27(3):189-195.  
21  
22 (18) Mahon J, Laupacis A, Donner A, Wood T. Randomised study of n of 1 trials versus standard  
23 practice. *BMJ* 1996; 312(7038):1069-1074.  
24  
25 (19) March L, Irwig L, Schwarz J, Simpson J, Chock C, Brooks P. n of 1 trials comparing a non-steroidal  
26 anti-inflammatory drug with paracetamol in osteoarthritis. *BMJ* 1994; 309(6961):1041-1045.  
27  
28 (20) Patel A, Jaeschke R, Guyatt GH, Keller JL, Newhouse MT. Clinical usefulness of n-of-1 randomized  
29 controlled trials in patients with nonreversible chronic airflow limitation. *Am Rev Respir Dis*  
30 1991; 144(4):962-964.  
31  
32 (21) Wallace AE, Kofoed LL. Statistical analysis of single case studies in the clinical setting: the  
33 example of methylphenidate trials in children with attention-deficit hyperactivity disorder. *J*  
34 *Child Adolesc Psychopharmacol* 1994; 4(3):141-150.  
35  
36 (22) Woodfield R, Goodyear-Smith F, Arroll B. N-of-1 trials of quinine efficacy in skeletal muscle  
37 cramps of the leg. *Br J Gen Pract* 2005; 55(512):181-185.  
38  
39 (23) Zucker DR, Ruthazer R, Schmid CH, Feuer JM, Fischer PA, Kieval RI et al. Lessons learned  
40 combining N-of-1 trials to assess fibromyalgia therapies. *J Rheumatol* 2006; 33(10):2069-2077.  
41  
42  
43  
44  
45  
46  
47  
48  
49  
50  
51  
52  
53  
54  
55  
56  
57  
58  
59  
60

Appendix Table 4. Studies reporting person-level treatment effect with both fixed-effect and random-effect using a method of moments estimator

| Study            | Outcome                                            | Fixed effect model        | P for HTE (fixed-effects model) | Random Treatment Effect    | summary_tau2 | P for HTE (random-effects model) | I-square |
|------------------|----------------------------------------------------|---------------------------|---------------------------------|----------------------------|--------------|----------------------------------|----------|
| March 1999       | Mean pain score on VAS taken from 2nd week of tx   | -4.155 (-4.807 to -3.502) | <0.001                          | -7.093 (-11.939 to -2.248) | 73.530       | <0.001                           | 97.5%    |
| March 1999       | Mean stiffness score on VAS taken from 2nd week of | -2.192 (-2.549 to -1.835) | <0.001                          | -5.992 (-11.280 to -0.704) | 88.872       | <0.001                           | 97.5%    |
| Emmanuel 2012    | Bloating                                           | -0.131 (-0.171 to -0.090) | <0.001                          | -0.344 (-0.619 to -0.069)  | 0.071        | <0.001                           | 94.2%    |
| Emmanuel 2012    | Pain                                               | -0.160 (-0.209 to -0.111) | <0.001                          | -0.440 (-0.771 to -0.110)  | 0.106        | <0.001                           | 96.0%    |
| Haas 2004        | Chronic tension-type headache grade                | 0.733 (0.609 to 0.857)    | <0.001                          | 0.772 (0.454 to 1.090)     | 0.350        | <0.001                           | 84.4%    |
| Haas_2004        | Chronic tension-type headache grade                | 0.543 (0.394 to 0.693)    | 0.067                           | 0.542 (0.354 to 0.731)     | 0.055        | 0.067                            | 37.2%    |
| Jaeschke 1991    | 7-point symptom scale                              | 0.356 (0.286 to 0.426)    | <0.001                          | 0.427 (0.210 to 0.645)     | 0.186        | <0.001                           | 85.0%    |
| Jaeschke 1991    | Tender point changes count                         | 1.072 (0.701 to 1.443)    | <0.001                          | 1.320 (0.404 to 2.236)     | 2.166        | <0.001                           | 72.3%    |
| Johannessen 1992 | 6-point symptom scale                              | 0.657 (0.530 to           | <0.001                          | 0.698 (0.466 to 0.931)     | 0.382        | <0.001                           | 65.8%    |

1  
2  
3  
4  
5  
6  
7  
8  
9  
10  
11  
12  
13  
14  
15  
16  
17  
18  
19  
20  
21  
22  
23  
24  
25  
26  
27  
28  
29  
30  
31  
32  
33  
34  
35  
36  
37  
38  
39  
40  
41  
42  
43  
44  
45  
46  
47

|                    |                              |                           |        |                             |         |        |       |
|--------------------|------------------------------|---------------------------|--------|-----------------------------|---------|--------|-------|
|                    |                              | 0.785)                    |        |                             |         |        |       |
| Mahon 1996         | Likert Scale (1-7)           | 0.069 (-0.042 to 0.179)   | <0.001 | 0.145 (-0.153 to 0.443)     | 0.134   | <0.001 | 77.6% |
| Patel 1991         | 4-item symptom questionnaire | 0.000 (-0.000 to 0.000)   | <0.001 | 0.000 (-0.000 to 0.000)     | 0.000   | <0.001 | 90.9% |
| Pereira 1995       | INR (diff)                   | 0.027 (-0.155 to 0.209)   | 0.477  | 0.027 (-0.155 to 0.209)     | 0.000   | 0.477  | 0.0%  |
| Wallace 1994       |                              | 0.759 (0.341 to 1.178)    | 0.747  | 0.759 (0.341 to 1.178)      | 0.000   | 0.747  | 0.0%  |
| Woodfield 15808032 | Number of cramps             | -5.395 (-7.091 to -3.699) | <0.001 | -18.823 (-28.527 to -9.120) | 161.582 | <0.001 | 92.0% |
| Woodfield 15808032 | Total days with cramps       | -7.600 (-8.420 to -6.781) | <0.001 | -6.181 (-9.798 to -2.563)   | 26.245  | <0.001 | 93.6% |
| Zucker 2006        | FIQ                          | -5.019 (-8.784 to -1.254) | 0.999  | -5.019 (-8.784 to -1.254)   | 0.000   | 0.999  | 0.0%  |

Appendix Table 5. Studies reporting person-level outcomes with both fixed-effect and random-effect hierarchical linear model

| Author Year            | Outcome                                       | Range of the Scales<br>(severity)                                       | Fixed Treatment Effect     | Random Treatment Effect | P-value Person Treatment Interaction |
|------------------------|-----------------------------------------------|-------------------------------------------------------------------------|----------------------------|-------------------------|--------------------------------------|
| <b>Camfield 1996</b>   | Nights without awakening                      | NR                                                                      | 0.865 (0.215 to 1.516)     | 0.84 (0.20 to 1.48)     | 0.456                                |
| <b>Hinderer 1990</b>   | Anxiety                                       |                                                                         | 0.000 (0.000 to 0.000)     | -1.06 (-1.88 to -0.23)  | <0.001                               |
| <b>Langer 1993</b>     | Vomiting                                      | NR                                                                      | -1.204 (-2.494 to 0.086)   | -1.20 (-2.49 to 0.09)   | 0.136                                |
| <b>Lashner 1990</b>    | Symptom score: abdominal pain                 | Symptom scores 0-100 (0=best, 100=worst)                                | -3.615 (-16.982 to 9.751)  | -3.62 (-15.84 to 8.61)  | 0.007                                |
|                        | Symptom score: bowel movements/day            |                                                                         | -0.538 (-1.215 to 0.138)   | -0.56 (-1.22 to 0.09)   | 0.001                                |
|                        | Symptom score: consistency of bowel movements |                                                                         | 7.000 (-7.551 to 21.551)   | 7.00 (-6.29 to 20.29)   | 0.013                                |
|                        | Symptom score: hematochezia                   |                                                                         | 2.308 (-17.210 to 21.826)  | 2.35 (-17.21 to 21.90)  | 0.003                                |
|                        | Symptom score: general sense of well-being    |                                                                         | -6.538 (-25.352 to 12.275) | -6.54 (-23.62 to 10.56) | 0.008                                |
| <b>Maier 1994</b>      | SCL-90 subscales: Depressed mood              | NR                                                                      | -3.536 (-6.718 to -0.354)  | -3.63 (-7.40 to 0.15)   | <0.001                               |
|                        | SCL-90 subscales: Anxiety                     |                                                                         | -3.753 (-6.582 to -0.924)  | -3.81 (-7.22 to -0.40)  | <0.001                               |
|                        | SCL-90 subscales: Somatization                |                                                                         | -1.419 (-4.316 to 1.478)   | -1.50 (-4.20 to 1.21)   | 0.869                                |
| <b>Mandelcorn 2004</b> | Self-Assessment score                         | 0-5 (0=worst, 5=best)                                                   | -2.052 (-8.865 to 4.761)   | -2.05 (-8.43 to 4.33)   | 0.05                                 |
|                        | Lower extremity ataxia                        | Fugl-Meyer: 3-point (0 cannot be performed to 2 can be fully performed) | 12.494 (-3.155 to 28.142)  | 12.49 (-0.85 to 25.84)  | 0.025                                |
|                        | Truncal ataxia                                | AMTI forceplate®: NR                                                    | 1.196 (-2.866 to 5.257)    | 1.20 (-2.06 to 4.45)    | 0.690                                |



| Author Year          | Outcome                                      | Range of the Scales<br>(severity)                                                                   | Fixed Treatment Effect    | Random Treatment Effect | P-value Person Treatment Interaction |
|----------------------|----------------------------------------------|-----------------------------------------------------------------------------------------------------|---------------------------|-------------------------|--------------------------------------|
|                      |                                              | <i>Berg Balance Scale® 0–56, with a higher score indicating a better performance</i>                |                           |                         |                                      |
|                      | Upper extremity ataxia                       | Purdue Pegboard Test®: pegs inserted into the board with each hand in 30 sec                        |                           | -0.50 (-3.10 to 2.10)   | 0.382                                |
|                      |                                              | <i>Minnesota Placing Test®: reach out, grasp, and place blocks in a specific order</i>              | -0.498 (-3.546 to 2.550)  |                         |                                      |
| <b>McQuay 1994</b>   | VAS Pain Intensity                           | 0-100 (0 = no pain, 100 = worst possible pain)                                                      | -1.094 (-5.572 to 3.383)  | -1.06 (-5.16 to 3.04)   | 0.004                                |
|                      | VAS Relief Intensity                         | 0-100 (0 = no relief, 100 = complete pain relief)                                                   | -3.913 (-11.729 to 3.903) | -3.86 (-11.11 to 3.40)  | 0.038                                |
| <b>Miyazaki 1995</b> | Incidence of angina                          | Either ST-segment elevation or depression at rest                                                   | 0.496 (-0.206 to 1.199)   | 0.47 (-0.32 to 1.26)    | 0.125                                |
| <b>Nathan 2006</b>   | Emetic episodes per day                      | complete response (0 episodes/day), major response (1–2 episodes/day), or failure (>2 episodes/day) | -0.095 (-0.514 to 0.325)  | -0.56 (-1.74 to 0.62)   | 0.001                                |
| <b>Parodi 1979</b>   | Ischemic attacks                             | ST elevation or depression (details NR)                                                             | -1.544 (-1.838 to -1.251) | -1.63 (-2.10 to -1.17)  | 0.007                                |
| <b>Parodi 1986</b>   | Asymptomatic ST elevation (After verapamil)  | NR                                                                                                  | -1.637 (-1.994 to -1.279) | -1.97 (-2.92 to -1.01)  | 0.110                                |
|                      | Asymptomatic ST depression (After verapamil) |                                                                                                     | -1.083 (-1.903 to -0.262) | -0.82 (-2.54 to 0.90)   | 0.401                                |

| Author Year         | Outcome                                           | Range of the Scales<br>(severity)                                      | Fixed Treatment Effect    | Random Treatment Effect   | P-value Person Treatment Interaction |
|---------------------|---------------------------------------------------|------------------------------------------------------------------------|---------------------------|---------------------------|--------------------------------------|
|                     | Symptomatic ST elevation<br>(After verapamil)     |                                                                        | -1.580 (-1.906 to -1.254) | -1.87 (-2.72 to -1.02)    | <0.001                               |
|                     | Symptomatic ST Depression<br>(After verapamil)    |                                                                        | -0.990 (-1.411 to -0.569) | -0.98 (-1.84 to -0.13)    | 0.002                                |
|                     | Asymptomatic ST elevation<br>(After propranolol)  |                                                                        | 0.100 (-0.086 to 0.286)   | -1.966 (-2.917 to -1.014) | 0.006                                |
|                     | Asymptomatic ST depression<br>(After propranolol) |                                                                        | 0.339 (-0.168 to 0.845)   | -0.821 (-2.539 to 0.897)  | 0.964                                |
|                     | Symptomatic ST elevation<br>(After propranolol)   |                                                                        | -0.002 (-0.177 to 0.173)  | -1.868 (-2.718 to -1.017) | 0.063                                |
|                     | Symptomatic ST Depression<br>(After propranolol)  |                                                                        | -0.374 (-0.709 to -0.039) | -0.981 (-1.835 to -0.126) | 0.023                                |
| <b>Pereira 1995</b> | INR                                               | Target INR range of 2.0–3.0                                            |                           | -0.12 (-0.30 to 0.07)     | 0.433                                |
| <b>Tison 2012</b>   | Troublesome dyskinesia                            | 7 points scale (1=extremely uncomfortable, 7=not at all uncomfortable) |                           | 0.20 (-0.40 to 0.80)      | 0.593                                |

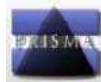

# PRISMA 2009 Checklist

| Section/topic                      | #  | Checklist item                                                                                                                                                                                                                                                                                              | Reported on page # |
|------------------------------------|----|-------------------------------------------------------------------------------------------------------------------------------------------------------------------------------------------------------------------------------------------------------------------------------------------------------------|--------------------|
| <b>TITLE</b>                       |    |                                                                                                                                                                                                                                                                                                             |                    |
| Title                              | 1  | Identify the report as a systematic review, meta-analysis, or both.                                                                                                                                                                                                                                         | 1                  |
| <b>ABSTRACT</b>                    |    |                                                                                                                                                                                                                                                                                                             |                    |
| Structured summary                 | 2  | Provide a structured summary including, as applicable: background; objectives; data sources; study eligibility criteria, participants, and interventions; study appraisal and synthesis methods; results; limitations; conclusions and implications of key findings; systematic review registration number. | 2                  |
| <b>INTRODUCTION</b>                |    |                                                                                                                                                                                                                                                                                                             |                    |
| Rationale                          | 3  | Describe the rationale for the review in the context of what is already known.                                                                                                                                                                                                                              | 1-2                |
| Objectives                         | 4  | Provide an explicit statement of questions being addressed with reference to participants, interventions, comparisons, outcomes, and study design (PICOS).                                                                                                                                                  | 2                  |
| <b>METHODS</b>                     |    |                                                                                                                                                                                                                                                                                                             |                    |
| Protocol and registration          | 5  | Indicate if a review protocol exists, if and where it can be accessed (e.g., Web address), and, if available, provide registration information including registration number.                                                                                                                               | n/a                |
| Eligibility criteria               | 6  | Specify study characteristics (e.g., PICOS, length of follow-up) and report characteristics (e.g., years considered, language, publication status) used as criteria for eligibility, giving rationale.                                                                                                      | 5-6                |
| Information sources                | 7  | Describe all information sources (e.g., databases with dates of coverage, contact with study authors to identify additional studies) in the search and date last searched.                                                                                                                                  | 5-6                |
| Search                             | 8  | Present full electronic search strategy for at least one database, including any limits used, such that it could be repeated.                                                                                                                                                                               | a1-a3              |
| Study selection                    | 9  | State the process for selecting studies (i.e., screening, eligibility, included in systematic review, and, if applicable, included in the meta-analysis).                                                                                                                                                   | 6                  |
| Data collection process            | 10 | Describe method of data extraction from reports (e.g., piloted forms, independently, in duplicate) and any processes for obtaining and confirming data from investigators.                                                                                                                                  | 6-7                |
| Data items                         | 11 | List and define all variables for which data were sought (e.g., PICOS, funding sources) and any assumptions and simplifications made.                                                                                                                                                                       | 6-8                |
| Risk of bias in individual studies | 12 | Describe methods used for assessing risk of bias of individual studies (including specification of whether this was done at the study or outcome level), and how this information is to be used in any data synthesis.                                                                                      | n/a                |
| Summary measures                   | 13 | State the principal summary measures (e.g., risk ratio, difference in means).                                                                                                                                                                                                                               | 8-9                |
| Synthesis of results               | 14 | Describe the methods of handling data and combining results of studies, if done, including measures of consistency (e.g., $I^2$ ) for each meta-analysis.                                                                                                                                                   | 8-9                |

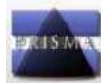

# PRISMA 2009 Checklist

Page 1 of 2

| Section/topic                 | #  | Checklist item                                                                                                                                                                                           | Reported on page # |
|-------------------------------|----|----------------------------------------------------------------------------------------------------------------------------------------------------------------------------------------------------------|--------------------|
| Risk of bias across studies   | 15 | Specify any assessment of risk of bias that may affect the cumulative evidence (e.g., publication bias, selective reporting within studies).                                                             | n/a                |
| Additional analyses           | 16 | Describe methods of additional analyses (e.g., sensitivity or subgroup analyses, meta-regression), if done, indicating which were pre-specified.                                                         | 8-9                |
| <b>RESULTS</b>                |    |                                                                                                                                                                                                          |                    |
| Study selection               | 17 | Give numbers of studies screened, assessed for eligibility, and included in the review, with reasons for exclusions at each stage, ideally with a flow diagram.                                          | 9, 20, 21, 29      |
| Study characteristics         | 18 | For each study, present characteristics for which data were extracted (e.g., study size, PICOS, follow-up period) and provide the citations.                                                             | 1-12, 22-26        |
| Risk of bias within studies   | 19 | Present data on risk of bias of each study and, if available, any outcome level assessment (see item 12).                                                                                                | n/a                |
| Results of individual studies | 20 | For all outcomes considered (benefits or harms), present, for each study: (a) simple summary data for each intervention group (b) effect estimates and confidence intervals, ideally with a forest plot. | 31, a11-a50        |
| Synthesis of results          | 21 | Present results of each meta-analysis done, including confidence intervals and measures of consistency.                                                                                                  | 10-12, 26          |
| Risk of bias across studies   | 22 | Present results of any assessment of risk of bias across studies (see Item 15).                                                                                                                          | n/a                |
| Additional analysis           | 23 | Give results of additional analyses, if done (e.g., sensitivity or subgroup analyses, meta-regression [see Item 16]).                                                                                    | 12, a53-a57        |
| <b>DISCUSSION</b>             |    |                                                                                                                                                                                                          |                    |
| Summary of evidence           | 24 | Summarize the main findings including the strength of evidence for each main outcome; consider their relevance to key groups (e.g., healthcare providers, users, and policy makers).                     | 12-14              |
| Limitations                   | 25 | Discuss limitations at study and outcome level (e.g., risk of bias), and at review-level (e.g., incomplete retrieval of identified research, reporting bias).                                            | 15-16              |
| Conclusions                   | 26 | Provide a general interpretation of the results in the context of other evidence, and implications for future research.                                                                                  | 16                 |
| <b>FUNDING</b>                |    |                                                                                                                                                                                                          |                    |
| Funding                       | 27 | Describe sources of funding for the systematic review and other support (e.g., supply of data); role of funders for the systematic review.                                                               | 17                 |

From: Moher D, Liberati A, Tetzlaff J, Altman DG, The PRISMA Group (2009). Preferred Reporting Items for Systematic Reviews and Meta-Analyses: The PRISMA Statement. PLoS Med 6(6): e1000097. doi:10.1371/journal.pmed1000097

For more information, visit: [www.prisma-statement.org](http://www.prisma-statement.org)

For peer review only - <http://bmjopen.bmj.com/site/about/guidelines.xhtml>

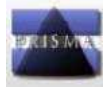

# PRISMA 2009 Checklist

For peer review only

- 1
- 2
- 3
- 4
- 5
- 6
- 7
- 8
- 9
- 10
- 11
- 12
- 13
- 14
- 15
- 16
- 17
- 18
- 19
- 20
- 21
- 22
- 23
- 24
- 25
- 26
- 27
- 28
- 29
- 30
- 31
- 32
- 33
- 34
- 35
- 36
- 37
- 38
- 39
- 40
- 41
- 42
- 43
- 44
- 45
- 46
- 47

# BMJ Open

## Evaluation of person-level heterogeneity of treatment effects in published multi-person N-of-1 studies: systematic review and re-analysis

|                                 |                                                                                                                                                                                                                                                                                                                                                                                                                                                            |
|---------------------------------|------------------------------------------------------------------------------------------------------------------------------------------------------------------------------------------------------------------------------------------------------------------------------------------------------------------------------------------------------------------------------------------------------------------------------------------------------------|
| Journal:                        | <i>BMJ Open</i>                                                                                                                                                                                                                                                                                                                                                                                                                                            |
| Manuscript ID                   | bmjopen-2017-017641.R1                                                                                                                                                                                                                                                                                                                                                                                                                                     |
| Article Type:                   | Research                                                                                                                                                                                                                                                                                                                                                                                                                                                   |
| Date Submitted by the Author:   | 01-Dec-2017                                                                                                                                                                                                                                                                                                                                                                                                                                                |
| Complete List of Authors:       | Raman, G; Tufts Medical Center<br>Balk, EM; Brown University<br>Lai, Lana; Tufts Medical Center<br>Shi, Jennifer; Tufts Medical Center<br>Chan, Jeffrey; VA Boston Healthcare System, Center for Healthcare Organization and Implementation Research (CHOIR)<br>Lutz, Jennifer; Tufts Medical Center<br>Dubois, Robert; National Pharmaceutical Council, Research<br>Kravitz, Richard; University of California Davis<br>Kent, David; Tufts Medical Center |
| <b>Primary Subject Heading</b>: | Patient-centred medicine                                                                                                                                                                                                                                                                                                                                                                                                                                   |
| Secondary Subject Heading:      | Research methods                                                                                                                                                                                                                                                                                                                                                                                                                                           |
| Keywords:                       | personalized medicine, n-of-1 studies, systematic review, heterogeneity of treatment effect                                                                                                                                                                                                                                                                                                                                                                |
|                                 |                                                                                                                                                                                                                                                                                                                                                                                                                                                            |

SCHOLARONE™  
Manuscripts

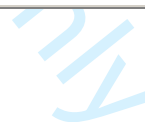

1  
2  
3 **Evaluation of person-level heterogeneity of treatment effects in published multi-person N-**  
4 **of-1 studies: systematic review and re-analysis**  
5  
6  
7  
8  
9

10 Gowri Raman, MD, MS<sup>a</sup>; Ethan M Balk, MD, MPH<sup>b</sup>; Lana Lai, MS<sup>c</sup>; Jennifer Shi, BA<sup>d</sup>; Jeff  
11 Chan, MD<sup>a,e</sup>; Jennifer Lutz, MA<sup>c</sup>; Robert Dubois, MD, PhD<sup>f</sup>; Richard L Kravitz, MD, MSPH<sup>g</sup>;  
12 David M Kent, MD, MS<sup>\*c</sup>  
13  
14  
15

16 <sup>a</sup>Center for Clinical Evidence Synthesis, ICRHPS, Medical Center/Tufts University School of  
17 Medicine, Boston, USA; <sup>b</sup>Center for Evidence Synthesis in Health, School of Public Health,  
18 Brown University, Providence, RI; <sup>c</sup>Predictive Analytics and Comparative Effectiveness Center,  
19 Institute for Clinical Research and Health Policy Studies, Tufts Medical Center/Tufts University  
20 School of Medicine, Boston, USA; <sup>d</sup>Center for the Evaluation of Value and Risk in Health,  
21 ICRHPS, Medical Center/Tufts University School of Medicine, Boston, USA; <sup>e</sup>VA Boston  
22 Healthcare System, Center for Healthcare Organization and Implementation Research (CHOIR);  
23 <sup>f</sup>National Pharmaceutical Council; <sup>g</sup>Department of Internal Medicine, University of California,  
24 Davis  
25  
26  
27  
28  
29  
30

31 **Corresponding Author:**

32 David Kent, MD, MS  
33 Director, Predictive Analytics and Comparative Effectiveness (PACE) Center  
34 Institute for Clinical Research and Health Policy Studies  
35 Tufts Medical Center  
36 800 Washington St, Box 63  
37 Boston, MA 02111  
38 Email: dkent1@tuftsmedicalcenter.org  
39 Phone: 617-636-3234  
40  
41  
42

43 **Running title: Variation in person-level treatment effects: systematic review**

44 **Word count**

45 Abstract: 224

46 Main text: 4,259 (main text, references)

47 Table: 5

48 Figures: 3

49 **Key words:** n-of-1 studies, systematic review, heterogeneity of treatment effect, personalized  
50 medicine  
51  
52  
53  
54  
55  
56  
57  
58  
59  
60

## Abstract

**Objective:** Individual patients with the same condition may respond differently to similar treatments. Our aim is to summarize the reporting of person-level heterogeneity of treatment effects (HTE) in multi-person N-of-1 studies and to examine the evidence for person-level HTE through re-analysis.

**Study Design:** Systematic review and re-analysis of multi-person N-of-1 studies.

**Data sources:** Medline, Cochrane Controlled Trials, EMBASE, Web of Science, and review of references through August 2017 for N-of-1 studies published in English.

**Study Selection:** N-of-1 studies of pharmacological interventions with at least two subjects.

**Data Synthesis:** Citation screening and data extractions were performed in duplicate. We performed statistical reanalysis testing for person-level HTE on all studies presenting person-level data.

**Results:** We identified 62 multi-person N-of-1 studies with at least two subjects. Statistical tests examining HTE were described in only 13 (21%), of which only two (3%) tested person-level HTE. Only 25 studies (40%) provided person-level data sufficient to re-analyze person-level HTE. Reanalysis using a fixed effect linear model identified statistically significant person-level HTE in 8 of the 13 studies (62%) reporting person-level treatment effects and in 8 of the 14 studies (57%) reporting person-level outcomes.

**Conclusions:** Our analysis suggests person-level HTE is common and often substantial. Reviewed studies had incomplete information on person-level treatment effects and their variation. Improved assessment and reporting of person-level treatment effects in multi-person N-of-1 studies are needed.



### Strengths and limitations of this study

- Multi-person N-of-1 studies are one of the best designs to estimate individual patient treatment effects and compare the variation in effects between individuals to variation within individuals across different periods
- This review highlights incomplete reporting of person-level treatment effects and their variation in multi-person N-of-1 studies.
- Re-analysis suggests person-level HTE is common and often substantial in multi-person N-of-1 studies, but varies from study to study.
- By distinguishing between condition-treatments with high versus low person-level HTE, multi-person N-of-1 studies have the potential to be important tools for personalized medicine.
- N-of-1 studies may be highly clinically informative for condition-treatments with a high degree of person-level HTE where the disease process is relatively stable over time, treatment effects are transient, and outcomes vary and are observable over time.

## Introduction

Clinicians commonly observe that individual patients given the same treatment for the same condition frequently respond differently from one another. This observation, combined with our understanding of the complex mechanisms of diseases and therapies and the potential importance of myriad patient-specific factors (e.g., age, sex, illness severity, comorbidities, co-treatments, and molecular differences influencing pharmacokinetics and -dynamics), have led to a widely held assumption that the observed variation in treatment response seen between individuals is not merely random, but stable and potentially predictable. This assumption underpins the field of personalized medicine, which aims to determine the best treatment for an individual patient, as opposed to treating all patients with the same intervention found to be most effective for the “average” patient.

Nevertheless, statistical analyses aimed at discovering heterogeneity of treatment effects (HTE) among groups of individuals (for example subgroup analyses of parallel arm randomized trials) typically fail to find compelling and reliable evidence for the presence of such heterogeneity. For example, statistically significant differences in treatment effects between men and women are often reported, but a systematic review indicates that the frequency of these interactions across studies suggests the vast majority occur by chance.<sup>1</sup> Similarly, the field of pharmacogenetics, also built on the assumption of stable variation in treatment responses, has largely failed to live up to its promise to broadly improve the targeting of drugs—particularly outside the special case of oncology (where studies generally depend on the subclassification of tumor tissue not on variation in germline polymorphisms).<sup>2;3</sup> This failure to find reproducible HTE has supported the contrarian notion that true individual effects may be a “myth,” an over-interpretation of random noise.<sup>4</sup>

1  
2  
3 To distinguish between these two possibilities, Kalow et al. have suggested that carefully  
4  
5 designed series of N-of-1 studies could be performed for those chronic conditions amenable to  
6  
7 this design (i.e., where the disease process is relatively stable over time, treatment effects are  
8  
9 transient, and outcomes vary and are observable over time).<sup>5</sup> By estimating individual patient  
10  
11 treatment effects and comparing the variation in effects between individuals to variation within  
12  
13 individuals across different periods, it is possible to determine heterogeneity in individual  
14  
15 treatment effects--even if one is unable to identify the variables that predict this variation (i.e.,  
16  
17 even in the absence of group-level HTE, such as men versus women, or old versus young).

18  
19  
20  
21 A recent review summarized N-of-1 studies reported in the literature—including multi-  
22  
23 person N-of-1 studies—but did not examine whether and how these studies provide information  
24  
25 on person-level HTE. Therefore our objectives are: 1) to summarize the conduct and reporting of  
26  
27 assessments of variation in person-level treatment effects from N-of-1 studies; and 2) to extract,  
28  
29 reanalyze and report the results from the subset of studies that provided adequate data in their  
30  
31 published reports to examine the extent of the evidence for person-level HTE (i.e., participant-  
32  
33 level outcomes or effects).<sup>6</sup>

## 34 35 36 37 38 39 40 **Methods**

41  
42  
43 This review was conducted in accordance with the highest standards for conducting  
44  
45 systematic reviews.<sup>7;8</sup> We defined N-of-1 studies as crossover trials in which each patient  
46  
47 receives two or more treatments in a pre-defined, often randomized, sequence.

## 48 49 50 51 ***Data Sources and Searches***

1  
2  
3 We used two separate searches because N-of-1 studies can be indexed differently: (1) a  
4 search in Medline, Cochrane Central and EMBASE using terms related to repeated crossover  
5 studies (for publications indexed from inception to August 17, 2017); and (2) a Medline,  
6  
7  
8  
9  
10 Cochrane Central, EMBASE, and Web of Science search using terms that are related to N-of-1  
11  
12 (for publications indexed from 2011 to August 17, 2017). For N-of-1 studies indexed before  
13  
14 2011, we used studies included in a prior published systematic review by Gabler et al.<sup>6</sup> Our  
15  
16 searches combined terms and Medical Subject Headings for N-of-1, single-subject, single-  
17  
18 patient, randomized trials, crossover, multi-period crossover, and rotated or repeated period  
19  
20 crossover (see Appendix Tables 1-2 for detailed search terms). The searches were not restricted  
21  
22 by disease, condition, organ system, or treatment.  
23  
24  
25  
26  
27

### 28 *Study Selection*

29  
30 We selected eligible multi-person N-of-1 studies to describe the frequency of reporting of  
31  
32 individual outcomes and effects and of documented HTE in these studies. We required that a  
33  
34 minimum of two individual subjects per study for evaluation of HTE. We excluded studies that  
35  
36 included non-pharmacological interventions, reviews, abstracts and protocols. We include  
37  
38 studies with placebo or “no treatment” interventions. Citations were double-screened by  
39  
40 reviewers using an open-source, online software Abstrackr (<http://abstrackr.cebm.brown.edu/>).  
41  
42 Full-text articles of potentially relevant studies were again double screened for eligibility.  
43  
44  
45  
46

47 Person-level outcomes were defined as outcomes for each person at each point in time  
48  
49 when they were measured, reported in tables, text, or graphs. Person-level treatment effect was  
50  
51 defined as contrasts of outcomes in individuals on one treatment versus the comparator. Person-  
52  
53 level HTE was defined as quantified variation in the person-level treatment effects, whereas HTE  
54  
55  
56  
57  
58  
59  
60

1  
2  
3 more broadly includes any type of subgroup analysis (e.g., males versus females; older versus  
4  
5 younger) as outlined in **Figure 1**.

### 6 7 8 ***Data Extraction and Quality Assessment***

9  
10 One of four reviewers extracted data from each publication; a second reviewer verified  
11  
12 all numerical information and basic descriptors of the study design and analysis. Operational  
13  
14 definitions for extraction items were discussed in weekly project meetings and discrepancies  
15  
16 between extractors were resolved by consensus with senior authors (DK, GR, EB). From each  
17  
18 study, we extracted bibliographic information, details related to study design (number of patients  
19  
20 enrolled, selection criteria, interventions evaluated, randomization methods, outcomes assessed,  
21  
22 follow-up duration), information on patient characteristics, and person-level measurements of  
23  
24 outcomes or estimates of person-level treatment effects (with corresponding measures of their  
25  
26 uncertainty). When necessary, we extracted data by digitizing the graphs and the values were  
27  
28 estimated using Engauge Digitizer version 2.14 (<http://digitizer.sourceforge.net/>). We assessed  
29  
30 the methodological quality of each study based on predefined criteria, in accordance with the  
31  
32 Agency for Healthcare Research and Quality (AHRQ) suggested methods and the Cochrane risk  
33  
34 of bias for clinical trials.<sup>9;10</sup>

35  
36  
37  
38  
39  
40 We generated graphs showing the trajectory of response for each patient in each study  
41  
42 and compared them against the published information. We also generated scatterplots of  
43  
44 measurements over time for studies that did not present their data in graphical format to help us  
45  
46 identify aberrant data points (e.g., errors in data extraction). We verified potentially aberrant data  
47  
48 points by re-examining the published data and made corrections, when needed.

### 49 50 51 ***Data Synthesis and Analyses***

1  
2  
3 We examined the degree to which studies reported person-level data. This was described  
4 using the following items for each reported outcome: 1) qualitative descriptions of HTE (e.g.,  
5 “there were 8 responders and 4 non-responders”); 2) details of person-level outcomes (i.e.,  
6 outcomes with each treatment within each period); 3) details of person-level treatment effect  
7 (i.e., a point estimate of contrasts of outcomes in individuals on one treatment versus the  
8 comparator); 4) reporting of person-level statistical effect estimate, (e.g., standard deviation,  
9 exact P values, or confidence intervals for treatment effects within individuals); 5) description of  
10 statistical tests examining HTE (i.e., tests evaluating the contrast of treatment effects between  
11 individuals or groups in the study); and 6) claims of HTE. Note that qualitative descriptions of  
12 HTE for item 1 would include any description that implied that treatment effects varied, whereas  
13 item 6 required a more definite study conclusion (e.g., “our results demonstrate significant  
14 variation across individuals in response to treatment X”), whether or not these conclusions were  
15 based on robust statistical tests.  
16  
17  
18  
19  
20  
21  
22  
23  
24  
25  
26  
27  
28  
29  
30  
31  
32

### 33 ***Statistical HTE analysis of extracted study results***

34  
35 We performed statistical analysis testing for person-level HTE on all studies presenting  
36 person-level data. We used a consistent analytic strategy across studies, to the extent permitted  
37 by the reporting in published papers. Our strategy was different for studies that reported person-  
38 level outcome measurements and those that reported estimates of person-level treatment effects  
39 with their sampling variances (or adequate information to approximately calculate these  
40 statistics).  
41  
42  
43  
44  
45  
46  
47  
48

49 For studies that only reported (or allowed the calculation of) *estimates of person-level*  
50 *treatment effects*, we obtained an average effect using a fixed effect inverse variance model and  
51 estimated the variance of the person-level treatment effects using DerSimonian and Laird method  
52  
53  
54  
55  
56  
57  
58  
59  
60

1  
2  
3 of moments estimator.<sup>11;12</sup> In addition to a fixed effect model, we also obtained an average effect  
4 using a random effects model. Finally, we tested the hypothesis that all person-level treatment  
5 effects were equal using Cochran's chi-square test and quantified the proportion of observed  
6 variation due to "true" person-level effect heterogeneity with the  $I^2$  statistic.<sup>13</sup>  
7  
8  
9

10  
11  
12 For studies that reported *person-level outcomes*, we developed a linear model (for  
13 continuous outcomes) or generalized linear model (for binary or count outcomes) using the  
14 outcome of interest as the response, the intervention(s) as a covariate; indicator variables for  
15 different study participants were derived.<sup>4</sup> This model estimates a common treatment effect  
16 across participants. We also derived a similar model with treatment-by-participant interactions.  
17 This model allows each patient to have a different effect. The statistical significance of person-  
18 level HTE was assessed by a likelihood ratio test comparing the two models. In addition to a  
19 fixed effect model, we also fit a hierarchical linear or generalized linear mixed model with a  
20 random intercept and a random slope (for the treatment effect) to estimate the average treatment  
21 effect across all patients (assuming person-level HTE). We tested the hypothesis that all person-  
22 level treatment effects were equal and quantified the proportion of observed variation due to  
23 'true' person-level effect heterogeneity with the  $I^2$  statistic.<sup>13</sup>  
24  
25  
26  
27  
28  
29  
30  
31  
32  
33  
34  
35  
36  
37  
38  
39  
40  
41  
42

## 43 Results

44  
45 The searches for repeated crossover studies identified 11,891 citations and those for N-  
46 of-1 studies identified 3819 citations (indexed from 2011 onwards). Of these, we retrieved 407  
47 full-text articles for review plus 100 N-of-1 trial articles (indexed before 2011) from an existing  
48 systematic review.<sup>5</sup> Upon full-text screening, 62 studies (58 multi-person N-of-1 studies and four  
49 repeated period crossover studies) met eligibility criteria (Appendix Table 3) and are reported  
50  
51  
52  
53  
54  
55  
56  
57  
58  
59  
60

1  
2  
3 multi-person N-of-1 studies throughout the article. An outline of the search and study selection  
4  
5 flow is provided in **Figure 2**.  
6  
7

### 8 9 10 *Description of studies*

11  
12 **Table 1** summarizes the 62 multi-person N-of-1 studies that were published between  
13  
14 1986 and 2017 reporting a total of 1974 patients. The most common clinical domains in the  
15  
16 multi-person N-of-1 studies were neurology (16%), arthritis/rheumatology (10%) and psychiatry  
17  
18 (9%). Most studies were described as “double-blind” but details about the methods for blinding  
19  
20 were often unclear; similarly studies often provided unclear information about the generation of  
21  
22 the randomization sequence and allocation concealment (Appendix Table 4). Among the studies,  
23  
24 93% compared a pair of treatment strategies, 5% compared three strategies, and 2% compared  
25  
26 four strategies. Studies had between 3 and 16 treatment periods and obtained an average of 1 to  
27  
28 42 outcome measurements per period. Across reported outcomes, 89% of the assessed outcomes  
29  
30 were patient-reported and 11% were investigator-assessed.  
31  
32  
33  
34  
35  
36  
37

### 38 *Reporting Person-level outcomes, effects and HTE*

39  
40 While most studies (92%) had some qualitative acknowledgement that the treatment  
41  
42 effects appeared to vary across individuals, formal reporting at the participant level was variable  
43  
44 (**Table 2**). Person-level outcomes under each treatment were reported in 52% of multi-person N-  
45  
46 of-1 studies. Person-level treatment effects with quantitative data (comparing outcomes on each  
47  
48 treatment) for each individual who completed the trial was available in 32%; and details on the  
49  
50 statistical evaluation of these effects (as standard deviations or exact P values or confidence  
51  
52 intervals) were available in 13 (21%) multi-person N-of-1 studies. Only five (8%) studies  
53  
54  
55  
56  
57  
58  
59  
60



1  
2  
3 described statistical tests examining any HTE. However, only two studies (3%) reported person-  
4 level HTE, whereas the other two examined group-level HTE using conventional subgroup  
5 analysis based on observable characteristics.  
6  
7  
8  
9

### 10 11 12 **Reanalysis of person-level data:** 13

14  
15 Of the 62 studies, there were 36 studies that provided person-level data, either as  
16 outcomes in each treatment period or as person-level treatment effects (**Table 3**). Of these, only  
17 25 studies provided person-level data sufficient to support re-analysis: 14 studies provided  
18 person-level outcomes; 13 studies provided person-level treatment effects (two studies provided  
19 both). The remaining 11 studies reported either medians or means without data on variance or  
20 did not provide sufficient information on completers, so they could not be re-analyzed for  
21 treatment effect or HTE.  
22  
23  
24  
25  
26  
27  
28  
29

30  
31 Of 13 studies (with 27 unique comparisons) that reported analyzable person-level  
32 treatment effect data (**Table 3**), 10 studies had a placebo comparator and three studies had an  
33 active comparator. The sample size ranged from 7 to 68; average crossover periods ranged from  
34 6 to 16 days; and average outcome measures per period ranged from 1 to 21. The average  
35 treatment duration ranged from 14 to 336 days.  
36  
37  
38  
39  
40  
41

42 There were 14 studies (with 27 unique comparisons) that reported analyzable person-level  
43 outcome data (**Table 3**), including two studies also reporting person-level treatment effects. Of  
44 these, 11 compared the intervention with placebo and three studies compared two active  
45 interventions. The sample size ranged from 2 to 22; the average number of crossover periods  
46 ranged from 3 to 10; and the average number of outcome measures per period ranged from 1 to  
47 42. The average treatment duration ranged from 9 to 210 days.  
48  
49  
50  
51  
52  
53  
54  
55  
56  
57  
58  
59  
60

### *Re-analysis of studies reporting estimates of person-level treatment effects*

Thirteen studies (including 27 comparisons, due to multiple outcomes in some studies) reported estimates of person-level treatment effects sufficient to analyze (Appendix Figures 1-16 displays graphs of the person level treatment effect data). Average fixed effect estimates for each analysis are shown in **Table 4**; random effects estimates were generally similar (Appendix 5). In 8 of the 13 studies (62%) and 15 of the 27 total unique comparisons (56%) we found evidence of statistically significant HTE for at least one outcome (Table 4). Generally, the magnitude in the variation of individual patient effects (as seen in the range) was very large compared to the average effects. Most studies (64%) showed person-level effects that differed qualitatively from one another. Most of the variation in the observed individual effects was attributable to “true” heterogeneity of person-level effects; 11 of 27 analyses had  $I^2 > 80\%$ .

### *Re-analysis of studies reporting person-level outcome measurements*

Because some of the 14 studies providing analyzable outcome data had multiple outcomes (or multiple outcomes scales) there were a total of 27 comparisons with analyzable data. (Appendix Figures 17-42 displays graphs of the person level outcome results.) Average fixed effect estimates for each analysis are shown in Table 5; random effects estimates were generally similar (Appendix Table 6). In eight of the 14 studies (57%) (17 of the 27 unique comparisons [63%]), there was statistically significant person-level HTE for at least one outcome. Again, the variation in individual effects was often large compared to the average effect. However, given the lower number of participants per study and periods per participant and also different analytic approach, estimates of  $I^2$  were much less precise in these studies.

## **Discussion**

1  
2  
3 This review documents that multi-person N-of-1 studies rarely examine HTE. Only 8%  
4  
5 of 62 multi-person N-of-1 studies described statistical tests examining HTE, but these generally  
6  
7 involved comparisons of treatment effects among groups of patients (e.g., based on age or sex)  
8  
9 rather than across individuals. Only two studies in the whole of the literature tested for person-  
10  
11 level HTE.<sup>14;15</sup> Nevertheless, analyzable person-level results are sometimes reported in multi-  
12  
13 person N-of-1 studies, as outcomes or as treatment effects. Our re-analyses of the totality of  
14  
15 available data from these studies (n=25) suggested the presence of substantial variation in  
16  
17 treatment effects across individuals in most studies. This was evident when considering  
18  
19 statistical tests for the variation of treatment effects among patients and also by qualitative  
20  
21 assessment of the magnitude of effect variation. This represents the first broad empirical  
22  
23 examination with re-analysis of person-level HTE across multi-person N-of-1 studies, and it  
24  
25 provides some general support for the *a priori* assumption of individual patient variation in  
26  
27 treatment response that broadly motivates personalized medicine.  
28  
29  
30  
31  
32

33 In contrast to parallel-group studies that establish efficacy in a group of patients with a  
34  
35 common condition, N-of-1 studies establish the effects of an intervention in an individual.<sup>16</sup> In  
36  
37 this respect, N-of-1 studies can be thought of as adjuncts to clinical care, where the goal is to  
38  
39 select the right treatment for a particular patient, rather than as a research tool, where the goal is  
40  
41 to create new generalizable knowledge.<sup>17;18</sup> Indeed, the results of traditional N-of-1 studies may  
42  
43 be generalizable only to the future treatment response of the patient in the trial, not to other  
44  
45 patients. Nevertheless, using Bayesian meta-analytic techniques, Zucker et al. showed how the  
46  
47 average treatment effect at the population-level can also be estimated from combining multi-  
48  
49 person N-of-1 studies testing similar interventions in similar patients with the same outcome  
50  
51  
52  
53  
54  
55  
56  
57  
58  
59  
60

1  
2  
3 measures.<sup>19</sup> Similar Bayesian methods have also been suggested for analysis of group-level  
4  
5 HTE.<sup>20</sup>  
6

7  
8 Herein, we demonstrate yet a new application of N-of-1 studies, to explore person-level  
9  
10 HTE to describe the variation in individual treatment effects. This application has important  
11  
12 research and clinical implications, even when the determinants of HTE remain unidentified. It is  
13  
14 particularly of interest that there was apparent variation in the *degree* of person-level HTE found  
15  
16 across conditions and treatments. Since the degree of variation across individuals sets the upper  
17  
18 bound for the amount of HTE that might be explainable by observable characteristics, such as  
19  
20 clinical or genomic variables, searching for subgroup effects in the absence of person-level HTE  
21  
22 is a futile exercise.<sup>4;21</sup>  
23  
24  
25

26  
27 An interesting example of how person-level HTE can vary across different conditions  
28  
29 comes from the study of Johannessen et al (**Figure 3**).<sup>14</sup> These investigators conducted N-of-1  
30  
31 patient studies comparing cimetidine to placebo for patients presenting with dyspeptic symptoms  
32  
33 and reported person-level effects by subgroups of disease categories. Among 46 trial completers,  
34  
35 cimetidine had a significant effect for most patients (57%) and at the aggregate level. However,  
36  
37 not only was there substantial person-level HTE, but person-level HTE varied across conditions,  
38  
39 being much more pronounced in non-ulcer dyspepsia ( $I^2 = 75\%$ ) compared to peptic ulcer  
40  
41 disease ( $I^2 = 35\%$ ) (Figure 3)— despite the very similar overall effects seen in these two  
42  
43 conditions.  
44  
45  
46

47  
48 Finding variation in person-level response in multi-person N-of-1 studies identifies those  
49  
50 conditions for which N-of-1 studies are likely to be clinically relevant. For condition-treatment  
51  
52 combinations shown to have low person-level HTE, single subject studies are highly unlikely to  
53  
54 be clinically informative, and the average results from trials (i.e., “one-size-fits-all” effects) are  
55  
56  
57  
58  
59  
60

1  
2  
3 more apt to be applicable to individuals.<sup>22;23</sup> On the other hand, N-of-1 studies may be highly  
4 clinically informative for condition-treatments with a high degree of person-level HTE. These  
5 conditions would also be potentially higher yield for examining predictors of HTE (genomic or  
6 otherwise).  
7  
8  
9  
10

11  
12 Our findings also have implications for clinical practice and formulary design. For  
13 conditions marked by high person-level HTE, even when trials show that one treatment is better  
14 on average than others, having a variety of medication options would be useful to optimize  
15 outcomes across all patients, particularly for chronic conditions such as those studied here where  
16 empiric trials of alternative medications to find the best treatment for an individual might be  
17 feasible. For example, the study by March et al. shows that while patients with osteoarthritis on  
18 average had less pain and less stiffness with diclofenac, some patients had improved symptoms  
19 on paracetamol.<sup>24</sup> This person-level heterogeneity of treatment effect may not be detectable in  
20 conventional parallel arm trials employing conventional subgroup analysis.<sup>21</sup>  
21  
22  
23  
24  
25  
26  
27  
28  
29  
30  
31  
32

33 While more studies combining N-of-1 studies are needed to understand the extent of  
34 person-level HTE, future studies need to apply greater methodological rigor to improve the state-  
35 of-the-science on evaluation of individual treatment effects.<sup>25</sup> While the recently published  
36 CONSORT Extension for N-of-1 Trials may help improve reporting, a tabulation of all  
37 information (possibly electronically available) appears the most straightforward way to facilitate  
38 the clinical interpretation of these studies.<sup>26</sup> Such reporting allows the inspection of trajectories  
39 over time and may reveal patterns that are not captured by regression models. Complete  
40 reporting would also facilitate the development and evaluation of methods for the analysis of  
41 single subject experiments, particularly its use to better understand the extent and importance of  
42 person-level HTE.  
43  
44  
45  
46  
47  
48  
49  
50  
51  
52  
53  
54  
55  
56  
57  
58  
59  
60

1  
2  
3 The limitations of this review reflect, to a large extent, the limitations of the data in  
4 primary studies. Many conditions are not amenable to the N-of-1 design (e.g. because treatment  
5 effects are cumulative or because outcomes are observed only once). Further, even for  
6 conditions and treatment that are potentially amenable to this design, many important disease  
7 categories lacked published N-of-1 studies.. We relied on published studies only and our analytic  
8 cohort may be an underestimation of the true prevalence of these studies—particularly for N-of-  
9 1 studies, which may frequently be conducted without the intention of future publication.

10  
11  
12 In addition, our conclusions regarding the ubiquity of HTE in the data we reanalyzed  
13 should be interpreted in the context of several important limitations. First, there were only a  
14 limited number of available studies that reported data sufficient to analyze, and therefore we  
15 present only a very partial picture of the full scope of inter-individual variation in effects across  
16 clinical conditions. Furthermore, among the studies that did have data, only fairly small numbers  
17 of patients were observed over a small number of treatment periods and we frequently had to rely  
18 on data summaries provided by the authors (e.g., person-level treatment effects and their  
19 sampling variance); these data limitations precluded the use of more complex models, for  
20 example models that account for period effects or other effects of time on the outcome.<sup>3</sup>

21  
22 Our review has demonstrated that HTE remains almost totally unexplored in multi-person  
23 N-of-1 studies, which are uniquely capable of exploring variations in individual (person-level)  
24 treatment effects. Our re-analysis of the data from these studies represents the first systematic  
25 attempt to obtain empirical support for the *a priori* argument that treatment effects vary across  
26 individual patients, an assumption which underpins all efforts to personalize treatment selection.  
27 In this sample, person-level HTE appears to be fairly common and large enough to be clinically  
28 meaningful; the degree of person-level HTE appears to vary across conditions and outcomes.

1  
2  
3 Thus, multi-person N-of-1 studies are an under-utilized tool to identify where person-level HTE  
4 may be substantial, and where efforts to find molecular or clinical predictors of response  
5  
6 heterogeneity should be focused. In such conditions, parallel arm studies might yield results that  
7  
8 are over-generalized for patient level decision making.  
9  
10  
11  
12  
13  
14  
15  
16  
17  
18  
19  
20  
21  
22  
23  
24  
25  
26  
27  
28  
29  
30  
31  
32  
33  
34  
35  
36  
37  
38  
39  
40  
41  
42  
43  
44  
45  
46  
47  
48  
49  
50  
51  
52  
53  
54  
55  
56  
57  
58  
59  
60

For peer review only

### **Funding Source**

This work was supported by the National Pharmaceutical Council.

### **Acknowledgement**

We would like to acknowledge Issa Dahabreh, MD, MS, Assistant Professor of Health Services, Policy and Practice, Assistant Professor of Epidemiology, Brown University, for statistical advice.

We would like to acknowledge Tatum Williamson, MS, Research Assistant, Predictive Analytics and Comparative Effectiveness Center, Institute for Clinical Research and Health Policy Studies, Tufts Medical Center, for assistance with updating literature.

### **Contributorship statement**

DK, GR made substantial contributions to the conception or design of the work; or the acquisition, analysis, or interpretation of data for the work. DK, GR are responsible for drafting the work or revising it critically for important intellectual content. DK, GR, EB, LL, JS, JC, JL, RD, RK have given final approval of the version to be published. DK, GR have made an agreement to be accountable for all aspects of the work in ensuring that questions related to the accuracy or integrity of any part of the work are appropriately investigated and resolved.

### **Competing interests**

None declared.

### **Data sharing statement**

No additional data are available..



## References

- (1) Wallach JD, Sullivan PG, Trepanowski JF, Steyerberg EW, Ioannidis JP. Sex based subgroup differences in randomized controlled trials: empirical evidence from Cochrane meta-analyses. *BMJ* 2016; 355:i5826.
- (2) Hertz DL, McLeod HL. Use of pharmacogenetics for predicting cancer prognosis and treatment exposure, response and toxicity. *J Hum Genet* 2013; 58(6):346-352.
- (3) Kitsios GD, Kent DM. Personalised medicine: not just in our genes. *BMJ* 2012; 344:e2161.
- (4) Senn S. Individual response to treatment: is it a valid assumption? *BMJ* 2004; 329(7472):966-968.
- (5) Kalow W, Tang BK, Endrenyi L. Hypothesis: comparisons of inter- and intra-individual variations can substitute for twin studies in drug research. *Pharmacogenetics* 1998; 8(4):283-289.
- (6) Gabler NB, Duan N, Vohra S, Kravitz RL. N-of-1 trials in the medical literature: a systematic review. *Med Care* 2011; 49(8):761-768.
- (7) Finding What Works in Health Care: Standards for Systematic Reviews. Institute of Medicine (US) Committee on Standards for Systematic Reviews of Comparative Effectiveness Research. 2011.
- (8) Moher D, Liberati A, Tetzlaff J, Altman DG. Preferred reporting items for systematic reviews and meta-analyses: the PRISMA statement. *Ann Intern Med* 2009; 151(4):264-9, W64.
- (9) Methods Guide for Effectiveness and Comparative Effectiveness Review. AHRQ Publication No 10(11)-EHC063-EF Chapters 2011 Available from: URL:<http://effectivehealthcare.ahrq.gov/>
- (10) Higgins JP, Altman DG, Gotzsche PC, Juni P, Moher D, Oxman AD et al. The Cochrane Collaboration's tool for assessing risk of bias in randomised trials. *BMJ* 2011; 343:d5928.
- (11) DerSimonian R, Laird N. Meta-analysis in clinical trials. *Control Clin Trials* 1986; 7(3):177-188.
- (12) Schmidt FL, Oh IS, Hayes TL. Fixed- versus random-effects models in meta-analysis: model properties and an empirical comparison of differences in results. *Br J Math Stat Psychol* 2009; 62(Pt 1):97-128.
- (13) Cochran WG. The combination of estimates from different experiments. *Biometrics* 10, 101-129. 1954.

- 1  
2  
3 (14) Johannessen T, Petersen H, Kristensen P, Fosstvedt D, Kleveland PM, Dybdahl J et al.  
4 Cimetidine on-demand in dyspepsia. Experience with randomized controlled single-  
5 subject trials. *Scand J Gastroenterol* 1992; 27(3):189-195.  
6
- 7  
8 (15) Pereira JA, Holbrook AM, Dolovich L, Goldsmith C, Thabane L, Douketis JD et al. Are  
9 brand-name and generic warfarin interchangeable? Multiple n-of-1 randomized,  
10 crossover trials. *Annals of Pharmacotherapy* 2005; 39(7-8):1188-1193.  
11
- 12 (16) Guyatt GH, Heyting A, Jaeschke R, Keller J, Adachi JD, Roberts RS. N of 1 randomized  
13 trials for investigating new drugs. *Control Clin Trials* 1990; 11(2):88-100.  
14
- 15 (17) Guyatt G, Sackett D, Taylor DW, Chong J, Roberts R, Pugsley S. Determining optimal  
16 therapy--randomized trials in individual patients. *N Engl J Med* 1986; 314(14):889-892.  
17
- 18 (18) Guyatt G, Sackett D, Adachi J, Roberts R, Chong J, Rosenbloom D et al. A clinician's  
19 guide for conducting randomized trials in individual patients. *CMAJ* 1988; 139(6):497-  
20 503.  
21  
22
- 23 (19) Zucker DR, Ruthazer R, Schmid CH. Individual (N-of-1) trials can be combined to give  
24 population comparative treatment effect estimates: methodologic considerations. *J Clin*  
25 *Epidemiol* 2010; 63(12):1312-1323.  
26
- 27 (20) Henderson NC, Louis TA, Wang C, Varadhan R. Bayesian analysis of heterogeneous  
28 treatment effects for patient-centered outcomes research. *Health Serv Outcomes Res*  
29 *Methodol* 2016; 16(4):213-233.  
30
- 31 (21) Dahabreh IJ, Hayward R, Kent DM. Using group data to treat individuals: understanding  
32 heterogeneous treatment effects in the age of precision medicine and patient-centred  
33 evidence. *Int J Epidemiol* 2016;45(6):2184-2193.  
34  
35
- 36 (22) Simon G. Choosing a first-line antidepressant: equal on average does not mean equal for  
37 everyone. *JAMA* 2001; 286(23):3003-3004.  
38
- 39 (23) Simon GE, Psaty BM, Hrachovec JB, Mora M. Principles for evidence-based drug  
40 formulary policy. *J Gen Intern Med* 2005; 20(10):964-968.  
41  
42
- 43 (24) March L, Irwig L, Schwarz J, Simpson J, Chock C, Brooks P. n of 1 trials comparing a  
44 non-steroidal anti-inflammatory drug with paracetamol in osteoarthritis. *BMJ* 1045;  
45 309(6961):1041-1045.  
46
- 47 (25) Kravitz RL, Duan N. eds, and the DEcIDE Methods Center N-of-1 Guidance Panel.  
48 Design and Implementation of N-of-1 Trials: A User's Guide. AHRQ Publication No.  
49 13(14)-EHC122-EF. Rockville, MD: Agency for Healthcare Research and Quality. 2014.  
50  
51
- 52 (26) Vohra S, Shamseer L, Sampson M, Bukutu C, Schmid CH, Tate R et al. CONSORT  
53 extension for reporting N-of-1 trials (CENT) 2015 Statement. *BMJ* 2015; 350:h1738.  
54  
55  
56  
57  
58  
59  
60

**Table 1. Evidence Map of Multi-person N-of-1 and Repeated Period Crossover Studies**

| <b>Description</b>                    | <b>Multi-person N-of-1 Studies<br/>(n=62)</b> |
|---------------------------------------|-----------------------------------------------|
| <b>Publication Years</b>              | 1979-2017                                     |
| <b>Subjects</b>                       | <b>Total N (median, IQR)</b>                  |
| Enrolled                              | 2153 (16, 9-42)                               |
| Completed                             | 1705 (12, 7-32)                               |
| <b>Intervention &amp; Comparisons</b> |                                               |
| Head-to-head active drugs             | 10                                            |
| Placebo                               | 47                                            |
| Active drug and placebo               | 1                                             |
| <b>Population</b>                     |                                               |
| Pediatric                             | 12                                            |
| Adults                                | 50                                            |
| <b>Major Systems Studied</b>          |                                               |
| Arthritis/Rheumatology                | 10                                            |
| Cardiovascular                        | 3                                             |
| Gastrointestinal                      | 7                                             |
| Hypertension                          | 1                                             |
| Psychiatry                            | 9                                             |
| Neurology                             | 16                                            |
| Respiratory                           | 9                                             |
| Miscellaneous*                        | 7                                             |
| <b>Top 5 Disease Conditions</b>       |                                               |
| ADHD                                  | 6                                             |
| Angina                                | 3                                             |
| Chronic Pain                          | 5                                             |
| GERD                                  | 5                                             |
| Obstructive Airway                    | 6                                             |
| Osteoarthritis                        | 6                                             |

\*Sleep disorders, Allergy, Cancer, Muscular, Vascular (for multi-person N-of-1); Pain, Urology, GYN, , Heme/Onc, Allergy, Dermatology, Drug abuse, Endocrine, Lipids, Nephrology, Ophthalmology, Respiratory (for Repeated Cross-over Studies). ADHD, Attention-deficit hyperactivity disorder; GERD, Gastroesophageal regurgitation disorder; IQR, Interquartile range; n, number of participants

**Table 2. Survey of HTE Assessment in Multi-person N-of-1 Studies**

| <b>HTE Reporting</b>                                            | <b>Multi-person<br/>N-of-1 Studies<br/>(n=62)</b> |
|-----------------------------------------------------------------|---------------------------------------------------|
| Qualitative description                                         | 92%                                               |
| Person-level outcomes                                           | 52%                                               |
| Person-level treatment effects                                  | 32%                                               |
| Statistical analysis of person-level effects<br>(e.g. p-values) | 21%                                               |
| Any statistical test for HTE                                    | 8%*                                               |
| Claims of heterogeneity                                         | 15%                                               |

\* Only 2 studies reported person-level HTE, the remaining 3 studies reported group level effect.

**Table 3. Characteristics of studies reporting person-level data**

| Author, Year                                                     | Disease                                                     | Number enrolled (analyzed) | Intervention               | Comparator                                   | Cross-over periods | Total intervention duration | Outcome measures per period |
|------------------------------------------------------------------|-------------------------------------------------------------|----------------------------|----------------------------|----------------------------------------------|--------------------|-----------------------------|-----------------------------|
| <i>Studies with re-analyzable person-level outcomes</i>          |                                                             |                            |                            |                                              |                    |                             |                             |
| Camfield, 1996                                                   | Mental retardation with fragmented sleep                    | 6 (6)                      | Melatonin                  | Placebo                                      | 7                  | 10 wk                       | 14                          |
| Hinderer, 1990                                                   | Traumatic spinal cord injury                                | 5 (5)                      | Baclofen                   | Placebo                                      | 3                  | 9 wk                        | 2                           |
| Langer, 1993                                                     | Gastroesophageal reflux                                     | 2 (2)                      | Cisapride                  | Placebo                                      | 3                  | 6 wk                        | 5                           |
| Lashner, 1990                                                    | Ulcerative colitis                                          | 7 (6)                      | Nicotine                   | Placebo                                      | 4                  | 8 wk                        | 1                           |
| Maier, 1994                                                      | Chronic depression                                          | 10 (9)                     | Sulpiride                  | Placebo                                      | 4                  | 28 wk                       | 42                          |
| Mandelcorn, 2004                                                 | Brain injury                                                | 4 (4)                      | Ondansetron                | Placebo                                      | 4                  | 5 wk                        | 1                           |
| McQuay, 1994                                                     | Neuropathic pain                                            | 19 (19)                    | Dextromethorphan           | Placebo                                      | 5                  | 20 d                        | 1                           |
| Miyazaki, 1995                                                   | Unstable angina                                             | 22 (22)                    | Isosorbide dinitrate       | Isosorbide dinitrate: intermittent injection | 3                  | 9 d                         | 6                           |
| Nathan, 2006                                                     | Pediatric brain tumor                                       | 12 (7)                     | Ondansetron & metopimazine | Ondansetron & placebo                        | Unclear            | 189 d                       | unclear                     |
| Parodi, 1979                                                     | Unstable angina                                             | 12 (12)                    | Verapamil                  | Placebo                                      | 4                  | 10 d                        | unclear                     |
| Parodi, 1986                                                     | Unstable angina                                             | 10 (10)                    | Verapamil                  | Propranolol, placebo                         | 8                  | 18 d                        | unclear                     |
| Tison, 2012                                                      | Levodopa-induced dyskinesia in Parkinson's disease patients | 10 (10)                    | Simvastatin                | Placebo                                      | 6                  | 96 d                        | 1                           |
| <i>Studies with re-analyzable person-level treatment effects</i> |                                                             |                            |                            |                                              |                    |                             |                             |
| Emmanuel, 2012                                                   | Chronic intestinal pseudo-obstruction                       | 7 (4)                      | Prucalopride               | Placebo                                      | 16                 | 48 wk                       | 21                          |
| Haas, 2004                                                       | Chronic tension-type and migraine headache                  | 39 (16)                    | Dextroamphetamine          | Equi-stimulatory caffeine                    | 8                  | 20 d                        | 20                          |
| Jaeschke, 1991                                                   | Fibromyalgia                                                | 22 (23)                    | Amitriptyline              | Placebo                                      | 6                  | 12 wk                       | 2                           |
| Johannessen, 1992                                                | Dyspepsia                                                   | 68 (46)                    | Cimetidine                 | Placebo                                      | 12                 | 184 d                       | 15                          |
| Lipka, 2017                                                      | Autoimmune myasthenia                                       | 4 (4)                      | Ephedrine                  | Placebo                                      | 4                  | 6 wk                        | 1                           |

|                                                                    |                                              |         |                                                                 |                                          |    |       |         |
|--------------------------------------------------------------------|----------------------------------------------|---------|-----------------------------------------------------------------|------------------------------------------|----|-------|---------|
|                                                                    | gravis                                       |         |                                                                 |                                          |    |       |         |
| <b>Mahon, 1996</b>                                                 | Irreversible chronic airflow limitation      | 16 (14) | Theophylline                                                    | Placebo                                  | 8  | 73 d  | 1       |
| <b>March, 1994</b>                                                 | Osteoarthritis                               | 25 (15) | Diclofenac                                                      | Paracetamol                              | 6  | 12 wk | 14      |
| <b>Patel, 1991</b>                                                 | Nonreversible chronic airflow limitation     | 26 (18) | Ipratropium bromide / theophylline / salbutamol/ beclomethasone | Placebo                                  | 6  | 6 wk  | Unclear |
| <b>Wallace, 1994</b>                                               | Attention deficit hyperactivity disorder     | 11 (7)  | Methylphenidate                                                 | Placebo                                  | 14 | 14 d  | 1       |
| <b>Woodfield, 2005</b>                                             | Skeletal muscle cramps                       | 13      | Quinine                                                         | Placebo                                  | 6  | 14 wk | 2       |
| <b>Zucker, 2006</b>                                                | Fibromyalgia                                 | 58      | Amitriptyline and Placebo                                       | Amitriptyline and fluoxetine combination | 6  | 36 wk | 1       |
| <b><i>Study with both person-level data</i></b>                    |                                              |         |                                                                 |                                          |    |       |         |
| <b>Pereira, 1995</b>                                               | Atrial fibrillation / deep venous thrombosis | 7       | Generic warfarin                                                | Coumadin                                 | 10 | 30 wk | 2       |
| <b>Joy, 2014</b>                                                   | Statin-related myalgia                       | 8 (7)   | Statin                                                          | Placebo                                  | 6  | 33 wk | 3       |
| <b><i>Study with insufficiently reported person-level data</i></b> |                                              |         |                                                                 |                                          |    |       |         |
| <b><i>Person-level outcome data</i></b>                            |                                              |         |                                                                 |                                          |    |       |         |
| <b>Denburg, 1994</b>                                               | Systemic lupus erythematosus                 | 10      | Prednisone                                                      | Placebo                                  | 6  | 30 wk | 1       |
| <b>Mitchel, 2015</b>                                               | Fatigue in advanced cancer                   | 43 (33) | Methylphenidate                                                 | Placebo                                  | 6  | 18 d  | 6       |
| <b>Nikles, 2000</b>                                                | Osteoarthritis                               | 14      | Ibuprofen                                                       | Paracetamol; Placebo                     | 6  | 12 wk | 14      |
| <b>Nikles, 2015</b>                                                | Dry mouth in advanced cancer                 | 17 (4)  | Pilocarpine                                                     | Placebo                                  | 6  | 18 d  | 6       |
| <b>Nikles, 2017</b>                                                | Acquired brain injury                        | 53 (38) | Nervous system stimulants                                       | Placebo                                  | 6  | 18 d  | 6       |
| <b>Reitberg, 2002</b>                                              | Allergic rhinitis                            | 36      | Loratadine and chlorpheniramine maleate                         | loratadine with placebo                  | 8  | 32 d  | 4       |
| <b>Sheather-Reid, 1998</b>                                         | Chronic pain                                 | 8       | Ibuprofen / Codeine                                             | Placebo                                  | 6  | 12 wk | 14      |
| <b>Person-level treatment effects</b>                              |                                              |         |                                                                 |                                          |    |       |         |

1  
2  
3  
4  
5  
6  
7  
8  
9  
10  
11  
12  
13  
14  
15  
16  
17  
18  
19  
20  
21  
22  
23  
24  
25  
26  
27  
28  
29  
30  
31  
32  
33  
34  
35  
36  
37  
38  
39  
40  
41  
42  
43  
44  
45  
46  
47

|                        |                               |    |               |         |    |       |    |
|------------------------|-------------------------------|----|---------------|---------|----|-------|----|
| <b>Huber, 2007</b>     | Juvenile idiopathic arthritis | 6  | Amitriptyline | Placebo | 6  | 17 wk | 12 |
| <b>Privitera, 1994</b> | Partial seizure               | 16 | Dezinamide    | Placebo | 6  | 35 wk | 6  |
| <b>Wegman, 2003</b>    | Osteoarthritis                | 13 | Paracetamol   | NSAIDs  | 10 | 20 wk | 14 |
| <b>Wegman, 2005</b>    | Regular Temazepam users       | 15 | Temazepam     | Placebo | 10 | 10 wk | 7  |

For peer review only

**Table 4. Analysis results of studies reporting person-level treatment effects**

| Author<br>Year              | Outcome                                                   | Range of the scales (severity)                                | Main Effect                |            | Person-Level Heterogeneity of Treatment Effect |                 |
|-----------------------------|-----------------------------------------------------------|---------------------------------------------------------------|----------------------------|------------|------------------------------------------------|-----------------|
|                             |                                                           |                                                               | Treatment effect (CI)      | P for HTE* | Treatment Effect Range                         | I-square % (CI) |
| <b>Emmanuel<br/>2012</b>    | Bloating                                                  | 0-4 (0=absent to 4=worst)                                     | -0.344 (-0.619 to -0.069)  | <0.001     | -1.1 to -0.1                                   | 94 (88 to 97)   |
|                             | Pain                                                      | 0-4 (0=absent to 4=worst)                                     | -0.440 (-0.771 to -0.110)  | <0.001     | -0.2 to -1.4                                   | 96 (92 to 98)   |
| <b>Haas<br/>2004</b>        | Chronic tension-type headache grade                       | 0-3 (0=none to 3=severe)                                      | 0.772 (0.454 to 1.090)     | <0.001     | 0.04 to 1.9                                    | 84 (76 to 90)   |
|                             | Chronic migraine headache grade                           | 0-3 (0=none to 3=severe)                                      | 0.542 (0.354 to 0.731)     | 0.067      | 0.2 to 0.83                                    | 37 (0 to 65)    |
| <b>Jaeschke<br/>1991</b>    | 7-point symptom scale                                     | 1-7 (higher scores represent better function)                 | 0.427 (0.210 to 0.645)     | <0.001     | -1.02 to 3.18                                  | 85 (79 to 89)   |
|                             | Tender point changes count                                | Number of tender points                                       | 1.320 (0.404 to 2.236)     | <0.001     | -4.33 to 9.0                                   | 72 (57 to 82)   |
| <b>Johannessen<br/>1992</b> | 6-point symptom scale                                     | 0-6 (0=NR to 6=NR)                                            | 0.698 (0.466 to 0.931)     | <0.001     | -1.67 to 3.17                                  | 66 (53 to 75)   |
| <b>Joy 2014</b>             | VAS myalgia Score                                         | 0-100mm (0=none to 100=worst)                                 | 0.119 (-2.283 to 2.521)    | 0.996      | -8,10 to 9.45                                  | 0 (0 to 68)     |
|                             | Symptom-specific VAS                                      | 0-100mm (0=none to 100=worst)                                 | 1.937 (0.179 to 3.696)     | 0.797      | -8.0 to 18.05                                  | 0 (0 to 68)     |
|                             | Pain severity score                                       | 0-10 (0=none to 10=worst)                                     | 0.086 (-0.215 to 0.387)    | 0.986      | 0.0 to 1.0                                     | 0 (0 to 68)     |
|                             | Pain interference score                                   | 0-10 (0=none to 10=worst)                                     | -0.016 (-0.095 to 0.064)   | 0.917      | -0.02 to 0.75                                  | 0 (0 to 68)     |
| <b>Lipka 2017</b>           | Quantitative myasthenia gravis score                      | 0-3 (0=none to 3=severe)                                      | 1.006 (0.215 to 1.797)     | 0.803      | 0.67 to 1.67                                   | 0 (0 to 85)     |
|                             | Myasthenia gravis composite                               | 0-50                                                          | 2.891 (0.348 to 5.433)     | 0.177      | -1.05 to 5.12                                  | 39 (0 to 80)    |
|                             | MG-ADL                                                    | 0-24                                                          | 1.099 (-0.277 to 2.474)    | 0.047      | 0.03 to 3.0                                    | 62 (0 to 87)    |
|                             | VAS score                                                 | 0-10 (0=none to 100=worst)                                    | 1.275 (-0.115 to 2.665)    | 0.190      | -0.01 to 3.02                                  | 37 (0 to 78)    |
| <b>Mahon<br/>1996</b>       | Dyspnea in likert Scale                                   | 1-7 (1=extremely short of breath to 7=no shortness)           | 0.125 (-0.181 to 0.430)    | <0.001     | -0.57 to 0.89                                  | 78 (58 to 88)   |
| <b>March<br/>1994</b>       | Mean pain score on VAS                                    | 5 point Likert scale (0-100mm)                                | -7.093 (-11.939 to -2.248) | <0.001     | -33.8 to 4.1                                   | 98 (97 to 98)   |
|                             | Mean stiffness score on VAS                               | 5 point Likert scale (0-100mm)                                | -5.992 (-11.280 to -0.704) | <0.001     | -36 to 10.7                                    | 97 (96 to 98)   |
| <b>Patel<br/>1991**</b>     | 4-item symptom questionnaire (All compared to placebo)    | 1-7 (1=extremely short of breath to 7=no shortness of breath) | 0.240 (0.131 to 0.350)     | <0.001     | -0.34 to 3.1                                   | 91 (87 to 94)   |
|                             | 4-item symptom questionnaire (use of ipratropium bromide) |                                                               | 0.675 (0.264 to 1.085)     | <0.001     | -0.22 to 3.1                                   | 87 (78 to 92)   |
|                             | 4-item symptom questionnaire (use of salbutamol)          |                                                               | 0.865 (0.042 to 1.687)     | <0.001     | 0.46 to 1.3                                    | 94 (NA)         |
|                             | 4-item symptom questionnaire (use of theophylline)        |                                                               | 0.025 (-0.434 to 0.484)    | 0.172      | -0.34 to 0.18                                  | 30 (0 to 93)    |
| <b>Pereira</b>              | INR (diff)                                                | Target INR range of 2.0–3.0                                   | 0.027 (-0.155 to 0.209)    | 0.477      | -0.28 to 0.37                                  | 0 (0 to 75)     |



1  
2  
3  
4  
5  
6  
7  
8  
9  
10  
11  
12  
13  
14  
15  
16  
17  
18  
19  
20  
21  
22  
23  
24  
25  
26  
27  
28  
29  
30  
31  
32  
33  
34  
35  
36  
37  
38  
39  
40  
41  
42  
43  
44  
45  
46  
47

|                       |                                     |                             |                             |        |               |               |
|-----------------------|-------------------------------------|-----------------------------|-----------------------------|--------|---------------|---------------|
| <b>1995</b>           |                                     |                             |                             |        |               |               |
| <b>Wallace 1994</b>   | Conners 15-item rating scale scores | 0-3 (NR)                    | 0.759 (0.341 to 1.178)      | 0.747  | 0.42 to 1.22  | 0 (0 to 79)   |
| <b>Woodfield 2005</b> | Changes in number of cramps         | Number – mean difference    | -18.823 (-28.527 to -9.120) | <0.001 | -77 to -2     | 92 (87 to 95) |
|                       | Total days with cramps              | days                        | -6.181 (-9.798 to -2.563)   | <0.001 | -13 to -1     | 94 (90 to 96) |
| <b>Zucker 2006</b>    | FIQ                                 | 0-100 (0=best to 100=worst) | -5.019 (-8.784 to -1.254)   | 0.999  | -32.0 to 0.98 | 0 (0 to 37)   |

\* The significance of person-level HTE was assessed by Cochran’s chi-square-based test  
 \*\* One subject had beclomethasone

For peer review only

**Table 5. Studies reporting person-level outcomes**

| Author<br>Year             | Outcome                                          | Definition / Range of the Scales<br>(severity)                                                                       | Main Effect                   | Person-level Heterogeneity of Treatment Effect |                                                                |                    |
|----------------------------|--------------------------------------------------|----------------------------------------------------------------------------------------------------------------------|-------------------------------|------------------------------------------------|----------------------------------------------------------------|--------------------|
|                            |                                                  |                                                                                                                      | Fixed Treatment Effect        | P for<br>Person<br>Treatment<br>Interaction*   | Treatment Effect Range<br>Lower Range (CI)<br>Upper Range (CI) | I-square %<br>(CI) |
| <b>Camfield<br/>1996</b>   | Nights without awakening                         | Between 10:00 PM and 7:00 AM<br>per day                                                                              | 0.865 (0.215 to 1.516)        | 0.456                                          | 0.12 to 2.0                                                    | 0 (0 to 79)        |
| <b>Hinderer<br/>1990</b>   | Anxiety                                          | Beck Inventory-A anxiety scale 0-3<br>(0 = never, 3 = almost all the time)                                           | 0.000 (0.000 to 0.000)        | <0.001                                         | -6.38 to 0.000                                                 | 91 (81 to 95)      |
| <b>Joy 2014</b>            | Myalgia score                                    | Visual Analogue Score for myalgia<br>(0=none to 100=worst)                                                           | 3.3812 (-2.668 to 9.430)      | 0.565                                          | -11.66 to 60.79                                                | 0 (0 to 68)        |
| <b>Langer<br/>1993</b>     | Vomiting                                         | Number of episodes                                                                                                   | -1.204 (-2.494 to 0.086)      | 0.136                                          | -1.34 to 0.17                                                  | 87 (NA)*           |
| <b>Lashner<br/>1990</b>    | Symptom score: abdominal<br>pain                 | Symptom scores 0-100 (0 = best,<br>100 = worst)                                                                      | -3.615 (-16.982 to 9.751)     | 0.007                                          | -35.0 to 15.0                                                  | 37 (0 to 73)       |
|                            | Symptom score: bowel<br>movements/day            |                                                                                                                      | -0.538 (-1.215 to 0.138)      | 0.001                                          | -3.0 to 1.0                                                    | 56.6 (0 to 81)     |
|                            | Symptom score: consistency<br>of bowel movements |                                                                                                                      | 7.000 (-7.551 to 21.551)      | 0.013                                          | -25.5 to 33.0                                                  | 28 (0 to 69)       |
|                            | Symptom score:<br>hematochezia                   |                                                                                                                      | 2.308 (-17.210 to<br>21.826)  | 0.003                                          | -38.0 to 47.5                                                  | 47 (0 to 78)       |
|                            | Symptom score: general<br>sense of well-being    |                                                                                                                      | -6.538 (-25.352 to<br>12.275) | 0.008                                          | -43.0 to 35.0                                                  | 35 (0 to 73)       |
| <b>Maier<br/>1994</b>      | SCL-90 subscales:<br>Depressed mood              | Self-rating inventory to measure the<br>effects of drug                                                              | -3.536 (-6.718 to -0.354)     | <0.001                                         | -17.8 to 2.74                                                  | 58 (12 to 80)      |
|                            | SCL-90 subscales: Anxiety                        |                                                                                                                      | -3.753 (-6.582 to -0.924)     | <0.001                                         | -17.4 to 2.5                                                   | 66 (30 to 83)      |
|                            | SCL-90 subscales:<br>Somatization                |                                                                                                                      | -1.419 (-4.316 to 1.478)      | 0.869                                          | -6.0 to 2.7                                                    | 0 (0 to 65)        |
| <b>Mandelcorn<br/>2004</b> | Self-Assessment score                            | 0–5 (0 = worst, 5 = best)                                                                                            | -2.052 (-8.865 to 4.761)      | 0.05                                           | -7.7 to 4.9                                                    | 0 (0 to 85)        |
|                            | Lower extremity ataxia                           | Fugl-Meyer: 3-point (0 cannot be<br>performed to 2 can be fully<br>performed)                                        | 12.494 (-3.155 to<br>28.142)  | 0.025                                          | -6.42 to 36.76                                                 | 35 (0 to 77)       |
|                            | Truncal ataxia                                   | AMTI forceplate®: NR<br><i>Berg Balance Scale® 0–56, with a<br/>higher score indicating a better<br/>performance</i> | 1.196 (-2.866 to 5.257)       | 0.690                                          | -0.52 to 2.20                                                  | 0 (0 to 85)        |
|                            | Upper extremity ataxia                           | Purdue Pegboard Test®: pegs<br>inserted into the board with each<br>hand in 30 sec                                   | -0.498 (-3.546 to 2.550)      | 0.382                                          | -3.68 to 1.42                                                  | 0 (0 to 85)        |

| Author<br>Year           | Outcome                                        | Definition / Range of the Scales<br>(severity)                                                      | Main Effect               |                                              | Person-level Heterogeneity of Treatment Effect                 |                    |
|--------------------------|------------------------------------------------|-----------------------------------------------------------------------------------------------------|---------------------------|----------------------------------------------|----------------------------------------------------------------|--------------------|
|                          |                                                |                                                                                                     | Fixed Treatment Effect    | P for<br>Person<br>Treatment<br>Interaction* | Treatment Effect Range<br>Lower Range (CI)<br>Upper Range (CI) | I-square %<br>(CI) |
|                          |                                                | <i>Minnesota Placing Test®: reach out, grasp, and place blocks in a specific order</i>              |                           |                                              |                                                                |                    |
| <b>McQuay<br/>1994</b>   | VAS Pain Intensity                             | 0-100 (0 = no pain, 100 = worst possible pain)                                                      | -1.094 (-5.572 to 3.383)  | 0.004                                        | -8.0 to 10.1                                                   | 0 (0 to 49)        |
|                          | VAS Relief Intensity                           | 0-100 (0 = no relief, 100 = complete pain relief)                                                   | -3.913 (-11.729 to 3.903) | 0.038                                        | -28.4 to 5.15                                                  | 0 (0 to 49)        |
| <b>Miyazaki<br/>1995</b> | Incidence of angina                            | Either ST-segment elevation or depression at rest                                                   | 0.496 (-0.206 to 1.199)   | 0.125                                        | -16.19 to 17.11                                                | 0 (0 to 60)        |
| <b>Nathan<br/>2006</b>   | Emetic episodes per day                        | complete response (0 episodes/day), major response (1–2 episodes/day), or failure (>2 episodes/day) | -0.095 (-0.514 to 0.325)  | 0.001                                        | -16.5 to 2.08                                                  | 59 (6 to 82)       |
| <b>Parodi<br/>1979</b>   | Ischemic attacks                               | ST elevation or depression (details NR)                                                             | -1.544 (-1.838 to -1.251) | 0.007                                        | -16.21 to -0.34                                                | 48 (0 to 73)       |
| <b>Parodi<br/>1986</b>   | Asymptomatic ST elevation (After verapamil)    | 0.1 mV of ST-segment elevation measured 20 ms after the J point                                     | -1.637 (-1.994 to -1.279) | 0.110                                        | -2.37 to -1.30                                                 | 6 (0 to 65)        |
|                          | Asymptomatic ST depression (After verapamil)   | More than 0.2 mV of ST-segment depression measured 80 ms after the J point                          | -1.083 (-1.903 to -0.262) | 0.401                                        | -17.42 to -0.90                                                | 0 (0 to 62)        |
|                          | Symptomatic ST elevation (After verapamil)     |                                                                                                     | -1.580 (-1.906 to -1.254) | <0.001                                       | -15.40 to -1.45                                                | 0 (0 to 62)        |
|                          | Symptomatic ST Depression (After verapamil)    |                                                                                                     | -0.990 (-1.411 to -0.569) | 0.002                                        | -2.53 to -0.52                                                 | 6 (0 to 64)        |
|                          | Asymptomatic ST elevation (After propranolol)  |                                                                                                     | 0.100 (-0.086 to 0.286)   | 0.006                                        | -0.77 to 1.38                                                  | 62 (25 to 81)      |
|                          | Asymptomatic ST depression (After propranolol) |                                                                                                     | 0.339 (-0.168 to 0.845)   | 0.964                                        | -18.3 to 0.83                                                  | 0 (0 to 62)        |
|                          | Symptomatic ST elevation (After propranolol)   |                                                                                                     | -0.002 (-0.177 to 0.173)  | 0.063                                        | -14.9 to 0.68                                                  | 46 (0 to 74)       |
|                          | Symptomatic ST Depression (After propranolol)  |                                                                                                     | -0.374 (-0.709 to -0.039) | 0.023                                        | -17.1 to -0.73                                                 | 4 (0 to 64)        |
| <b>Pereira<br/>1995</b>  | INR                                            | Target INR range of 2.0–3.0                                                                         | -0.126 (-0.312 to 0.060)  | 0.433                                        | -0.42 to 0.16                                                  | 0 (0 to 71)        |
| <b>Tison 2012</b>        | Troublesome dyskinesia                         | 7 points scale (1 = extremely uncomfortable, 7 = not at all uncomfortable)                          | 0.167 (-0.449 to 0.783)   | 0.593                                        | -0.67 to 1.83                                                  | 0 (0 to 62)        |

\* The significance of person-level HTE was assessed by a likelihood ratio test comparing the two models – model with common treatment effect and model with treatment-by-participant interactions

## Figure Legend

**Figure 1:** The Figure provides a schematic description of: person-level outcomes (outcomes for each patient during each treatment period); person-level effects (contrasts of the outcomes for each patient in one treatment condition *versus* another); and person-HTE (between patient contrasts of effects).

**Figure 2.** Study Flow Diagram represents the flow of eligible studies included in this review

**Figure 3.** Person-level variation across different disease conditions. This figure depicts the results of 46 different N-of-1 trials of cimetidine as reported by Johannesssen et al <sup>12</sup>. The effect of cimetidine versus placebo was measured in each subject across 12 cross-over periods over the span of 184 days. While cimetidine had a similar average effect regardless of the index condition, there was far greater consistency of effect in patients with peptic ulcer disease and much more variation in effect among patients with non-ulcer dyspepsia.

1  
2  
3  
4  
5  
6  
7  
8  
9  
10  
11  
12  
13  
14  
15  
16  
17  
18  
19  
20  
21  
22  
23  
24  
25  
26  
27  
28  
29  
30  
31  
32  
33  
34  
35  
36  
37  
38  
39  
40  
41  
42  
43  
44  
45  
46  
47  
48  
49  
50  
51  
52  
53  
54  
55  
56  
57  
58  
59  
60

For peer review only

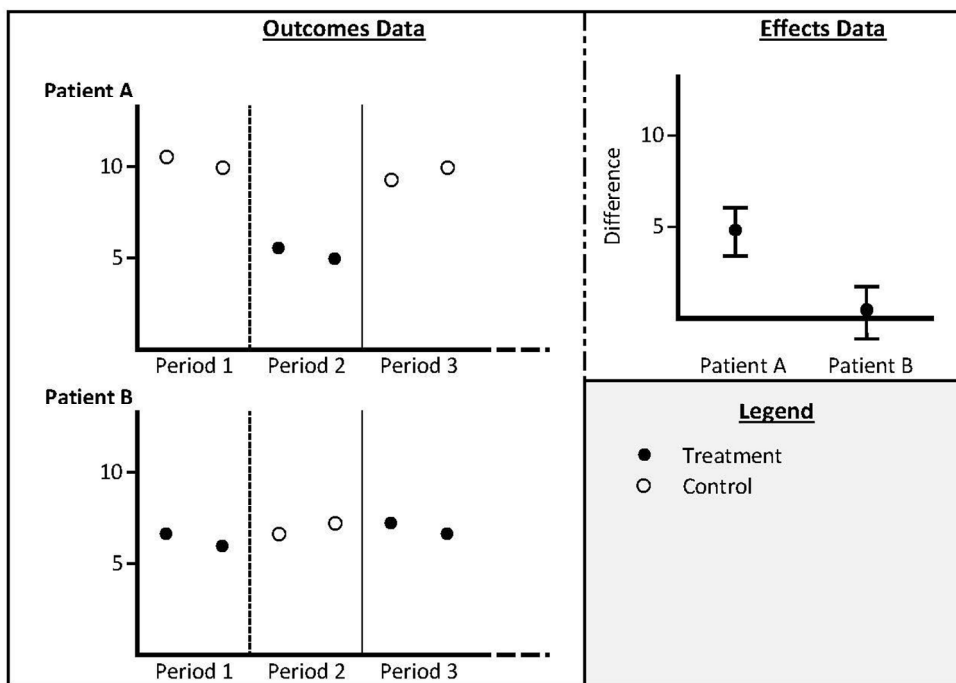

Figure 1: The Figure provides a schematic description of: person-level outcomes (outcomes for each patient during each treatment period); person-level effects (contrasts of the outcomes for each patient in one treatment condition versus another); and person-HTE (between patient contrasts of effects).

111x79mm (300 x 300 DPI)

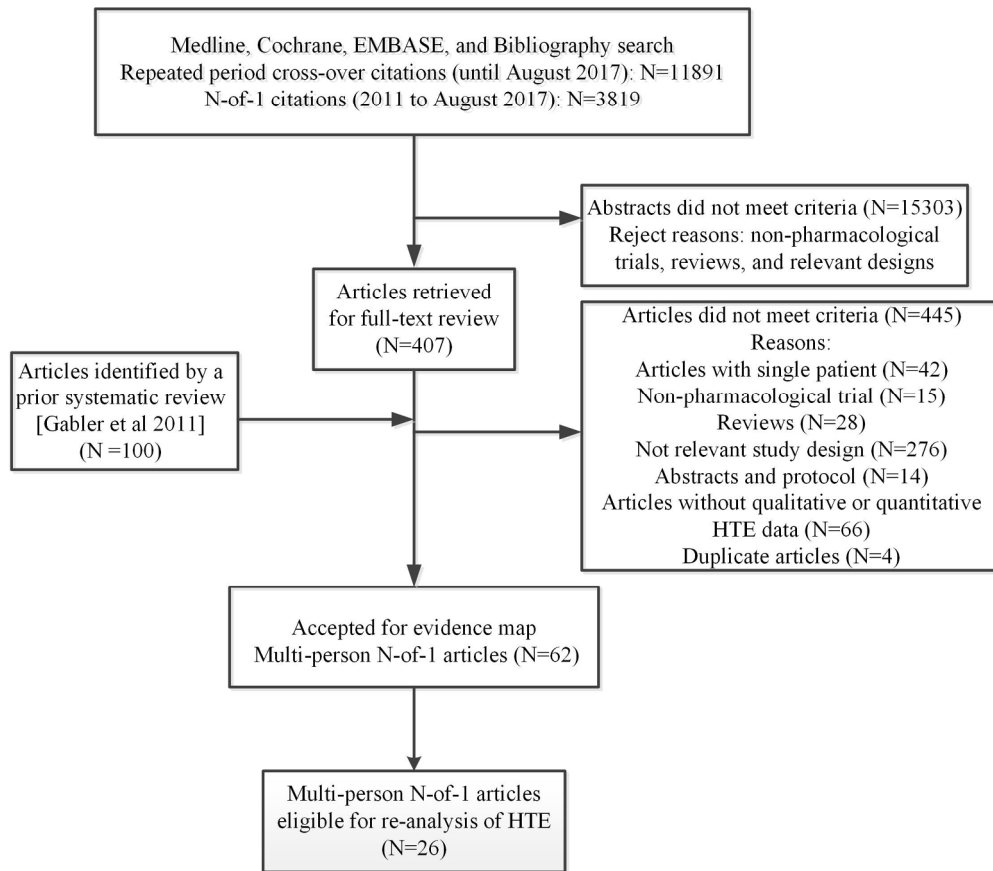

35 Figure 2. Study Flow Diagram represents the flow of eligible studies included in this review

36 189x164mm (300 x 300 DPI)

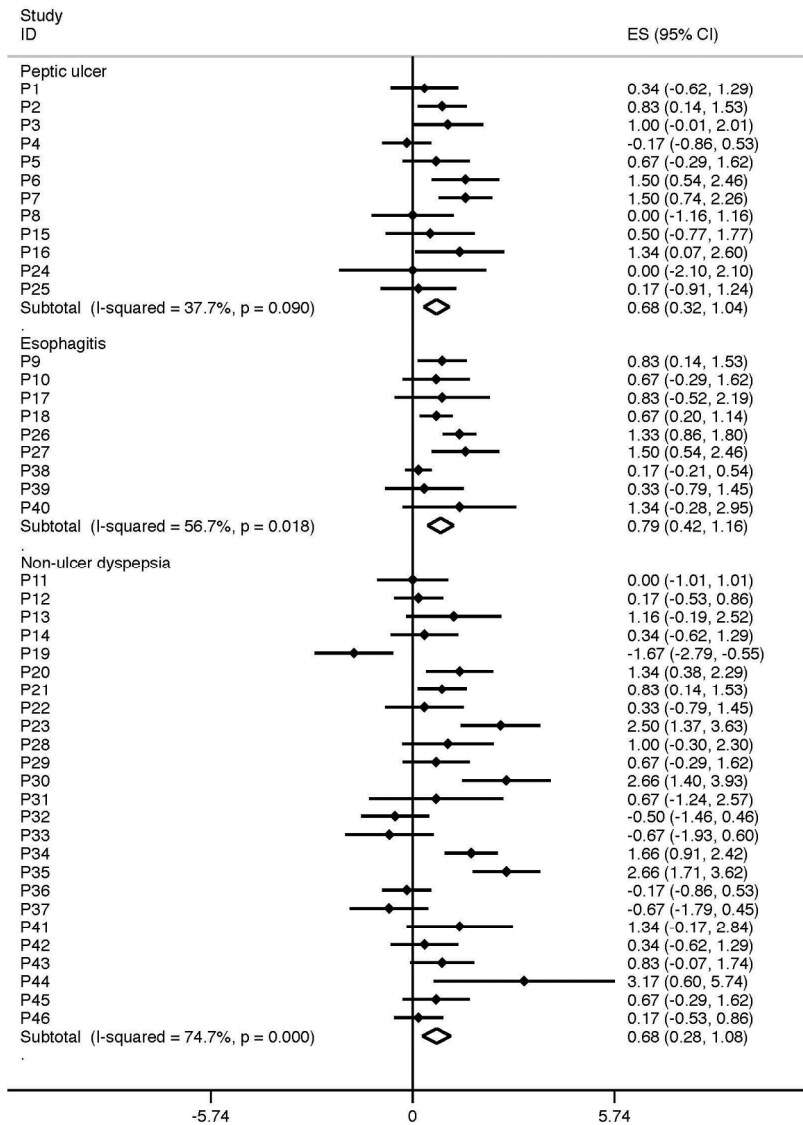

Figure 3. Person-level variation across different disease conditions. This figure depicts the results of 46 different N-of-1 trials of cimetidine as reported by Johannesssen et al 12. The effect of cimetidine versus placebo was measured in each subject across 12 cross-over periods over the span of 184 days. While cimetidine had a similar average effect regardless of the index condition, there was far greater consistency of effect in patients with peptic ulcer disease and much more variation in effect among patients with non-ulcer dyspepsia.

150x203mm (300 x 300 DPI)



## Appendix Materials

**Appendix Table 1: N-of-1 Trial Searches**

|     |                                                                                        |
|-----|----------------------------------------------------------------------------------------|
| 1.  | randomized controlled trial.pt.                                                        |
| 2.  | controlled clinical trial.pt.                                                          |
| 3.  | randomized controlled trials/                                                          |
| 4.  | Double-blind Method/                                                                   |
| 5.  | Single-Blind Method/                                                                   |
| 6.  | clinical trial.pt.                                                                     |
| 7.  | Clinical Trials.mp. or exp Clinical Trials/                                            |
| 8.  | random\$.tw.                                                                           |
| 9.  | trial\$.tw.                                                                            |
| 10. | Cross-Over Studies/                                                                    |
| 11. | or/1-10                                                                                |
| 12. | n-of-1.af.                                                                             |
| 13. | 11 and 12                                                                              |
| 14. | (single-subject or single-patient or single case or single-case or within-patient).af. |
| 15. | ((single adj1 patient) or (single adj1 subject)).tw.                                   |
| 16. | 14 or 15                                                                               |
| 17. | 12 and 16                                                                              |
| 18. | multi-crossover.mp.                                                                    |
| 19. | 12 and 18                                                                              |
| 20. | 13 or 17 or 19                                                                         |
| 21. | limit 19 to yr="2010 - 2017"                                                           |

**Appendix Table 2: Repeated Period Crossover Trials**

|     |                                                                |
|-----|----------------------------------------------------------------|
| 1.  | (repeat\$ or rotat\$).af.                                      |
| 2.  | ((three or four or five or six) and period).tw.                |
| 3.  | (multi- or multiple).tw.                                       |
| 4.  | (three-period or four-period or five-period or six-period).tw. |
| 5.  | (three-way or four-way or five-way or six-way).tw.             |
| 6.  | or/1-5                                                         |
| 7.  | Cross-Over Studies/ or (cross-over or crossover).af.           |
| 8.  | 6 and 7                                                        |
| 9.  | randomized controlled trial.pt.                                |
| 10. | controlled clinical trial.pt.                                  |
| 11. | randomized controlled trials/                                  |
| 12. | Double-blind Method/                                           |
| 13. | Single-Blind Method/                                           |
| 14. | clinical trial.pt.                                             |
| 15. | Clinical Trials.mp. or exp Clinical Trials/                    |
| 16. | random\$.tw.                                                   |
| 17. | trial\$.tw.                                                    |
| 18. | or/9-17                                                        |
| 19. | 8 and 18                                                       |
| 20. | (dt or de or tu).fs.                                           |
| 21. | 19 and 20                                                      |
| 22. | 7 and 20                                                       |
| 23. | “Reproducibility of Results”/                                  |
| 24. | 16 and 22                                                      |
| 25. | limit 22 to english language                                   |
| 26. | 9 or 10 or 11 or 14 or 15 or 16                                |
| 27. | 7 or 23                                                        |
| 28. | 20 and 26 and 27                                               |
| 29. | random.af.                                                     |
| 30. | 9 or 10 or 11 or 14 or 15 or 29                                |
| 31. | ae.fs.                                                         |
| 32. | 20 or 31                                                       |
| 33. | 27 and 30 and 32                                               |
| 34. | limit 33 to (english language and humans)                      |
| 35. | periods.af.                                                    |

1  
2  
3  
4  
5  
6  
7  
8  
9  
10  
11  
12  
13  
14  
15  
16  
17  
18  
19  
20  
21  
22  
23  
24  
25  
26  
27  
28  
29  
30  
31  
32  
33  
34  
35  
36  
37  
38  
39  
40  
41  
42  
43  
44  
45  
46  
47  
48  
49  
50  
51  
52  
53  
54  
55  
56  
57  
58  
59  
60

|     |                     |
|-----|---------------------|
| 36. | 6 or 35             |
| 37. | 33 and 36           |
| 38. | Animals/ not human/ |
| 39. | 37 not 38           |

For peer review only

**Appendix Table 3: Reference List of Included Studies**

|     |                                                                                                                                                                                                                                                                                                                                                                                         |
|-----|-----------------------------------------------------------------------------------------------------------------------------------------------------------------------------------------------------------------------------------------------------------------------------------------------------------------------------------------------------------------------------------------|
| 1.  | Nikles CJ, McKinlay L, Mitchell GK, Carmont SA, Senior HE, Waugh MC et al. Aggregated n-of-1 trials of central nervous system stimulants versus placebo for paediatric traumatic brain injury--a pilot study. <i>Trials [Electronic Resource]</i> 2014; 15:54.                                                                                                                          |
| 2.  | Tison F, Negre-Pages L, Meissner WG, Dupouy S, Li Q, Thiolat ML et al. Simvastatin decreases levodopa-induced dyskinesia in monkeys, but not in a randomized, placebo-controlled, multiple cross-over ("n-of-1") exploratory trial of simvastatin against levodopa-induced dyskinesia in Parkinson's disease patients. <i>Parkinsonism &amp; Related Disorders</i> 2013; 19(4):416-421. |
| 3.  | Rascol O, Ferreira J, Negre-Pages L, Perez-Lloret S, Lacomblez L, Galitzky M et al. A proof-of-concept, randomized, placebo-controlled, multiple cross-overs (n-of-1) study of naftazone in Parkinson's disease. <i>Fundamental &amp; Clinical Pharmacology</i> 2012; 26(4):557-564.                                                                                                    |
| 4.  | Emmanuel AV, Kamm MA, Roy AJ, Kerstens R, Vandeplassche L. Randomised clinical trial: the efficacy of prucalopride in patients with chronic intestinal pseudo-obstruction--a double-blind, placebo-controlled, cross-over, multiple n = 1 study. <i>Alimentary Pharmacology &amp; Therapeutics</i> 2012; 35(1):48-55.                                                                   |
| 5.  | Yelland MJ, Poulos CJ, Pillans PI, Bashford GM, Nikles CJ, Sturtevant JM et al. N-of-1 randomized trials to assess the efficacy of gabapentin for chronic neuropathic pain. <i>Pain Medicine</i> 2009; 10(4):754-761.                                                                                                                                                                   |
| 6.  | Nonoyama ML, Brooks D, Guyatt GH, Goldstein RS. Effect of oxygen on health quality of life in patients with chronic obstructive pulmonary disease with transient exertional hypoxemia. <i>American Journal of Respiratory &amp; Critical Care Medicine</i> 2007; 176(4):343-349.                                                                                                        |
| 7.  | Huber AM, Tomlinson GA, Koren G, Feldman BM. Amitriptyline to relieve pain in juvenile idiopathic arthritis: a pilot study using Bayesian metaanalysis of multiple N-of-1 clinical trials. <i>Journal of Rheumatology</i> 2007; 34(5):1125-1132.                                                                                                                                        |
| 8.  | Yelland MJ, Nikles CJ, McNair N, Del Mar CB, Schluter PJ, Brown RM. Celecoxib compared with sustained-release paracetamol for osteoarthritis: a series of n-of-1 trials. <i>Rheumatology</i> 2007; 46(1):135-140.                                                                                                                                                                       |
| 9.  | Zucker DR, Ruthazer R, Schmid CH, Feuer JM, Fischer PA, Kieval RI et al. Lessons learned combining N-of-1 trials to assess fibromyalgia therapies. <i>Journal of Rheumatology</i> 2006; 33(10):2069-2077.                                                                                                                                                                               |
| 10. | Nikles CJ, Mitchell GK, Del Mar CB, Clavarino A, McNair N. An n-of-1 trial service in clinical practice: testing the effectiveness of stimulants for attention-deficit/hyperactivity disorder. <i>Pediatrics</i> 2006; 117(6):2040-2046.                                                                                                                                                |
| 11. | Nathan PC, Tomlinson G, Dupuis LL, Greenberg ML, Ota S, Bartels U et al. A pilot study of ondansetron plus metopimazine vs. ondansetron monotherapy in children receiving highly emetogenic chemotherapy: a Bayesian randomized serial N-of-1 trials design. <i>Supportive Care in Cancer</i> 2006; 14(3):268-276.                                                                      |
| 12. | Pereira JA, Holbrook AM, Dolovich L, Goldsmith C, Thabane L, Douketis JD et al. Are brand-name and generic warfarin interchangeable? Multiple n-of-1 randomized, crossover trials. <i>Annals of Pharmacotherapy</i> 2005; 39(7-8):1188-1193.                                                                                                                                            |
| 13. | Woodfield R, Goodyear-Smith F, Arroll B. N-of-1 trials of quinine efficacy in skeletal muscle cramps of the leg. <i>British Journal of General Practice</i> 2005; 55(512):181-185.                                                                                                                                                                                                      |
| 14. | Wegman AC, van der Windt DA, Bongers M, Twisk JW, Stalman WA, de Vries TP. Efficacy of temazepam in frequent users: a series of N-of-1 trials. <i>Family Practice</i> 2005; 22(2):152-159.                                                                                                                                                                                              |
| 15. | Nikles CJ, Yelland M, Glasziou PP, Del MC. Do individualized medication effectiveness tests (n-of-1 trials) change clinical decisions about which drugs to use for osteoarthritis and chronic pain?. [Review] [19 refs]. <i>American Journal of Therapeutics</i> 2005; 12(1):92-97.                                                                                                     |
| 16. | Smith BJ, Appleton SL, Veale AJ, McElroy HJ, Veljkovic D, Saccoia L. Eformoterol n-of-1 trials in chronic obstructive pulmonary disease poorly reversible to salbutamol. <i>Chronic Respiratory Disease</i> 2004; 1(2):63-69.                                                                                                                                                           |

|     |                                                                                                                                                                                                                                                                 |
|-----|-----------------------------------------------------------------------------------------------------------------------------------------------------------------------------------------------------------------------------------------------------------------|
| 17. | Haas DC, Sheehe PR. Dextroamphetamine pilot crossover trials and n of 1 trials in patients with chronic tension-type and migraine headache. <i>Headache</i> 2004; 44(10):1029-1037.                                                                             |
| 18. | Mandelcorn J, Cullen NK, Bayley MT. A preliminary study of the efficacy of ondansetron in the treatment of ataxia, poor balance and incoordination from brain injury. <i>Brain Injury</i> 2004; 18(10):1025-1039.                                               |
| 19. | Pope JE, Prashker M, Anderson J. The efficacy and cost effectiveness of N of 1 studies with diclofenac compared to standard treatment with nonsteroidal antiinflammatory drugs in osteoarthritis. <i>Journal of Rheumatology</i> 2004; 31(1):140-149.           |
| 20. | Wegman AC, van der Windt DA, de HM, Deville WL, Fo CT, de Vries TP. Switching from NSAIDs to paracetamol: a series of n of 1 trials for individual patients with osteoarthritis. <i>Annals of the Rheumatic Diseases</i> 2003; 62(12):1156-1161.                |
| 21. | Reitberg DP, Del RE, Weiss SL, Rebell G, Zaias N. Single-patient drug trial methodology for allergic rhinitis. <i>Annals of Pharmacotherapy</i> 2002; 36(9):1366-1374.                                                                                          |
| 22. | Linday LA, Tsiouris JA, Cohen IL, Shindldecker R, DeCresce R. Famotidine treatment of children with autistic spectrum disorders: pilot research using single subject research design. <i>Journal of Neural Transmission</i> 2001; 108(5):593-611.               |
| 23. | Duggan CM, Mitchell G, Nikles CJ, Glasziou PP, Del Mar CB, Clavarino A. Managing ADHD in general practice. N of 1 trials can help! <i>Australian Family Physician</i> 2000; 29(12):1205-1209.                                                                   |
| 24. | Nikles CJ, Glasziou PP, Del Mar CB, Duggan CM, Clavarino A, Yelland MJ. Preliminary experiences with a single-patient trials service in general practice. <i>Medical Journal of Australia</i> 2000; 173(2):100-103.                                             |
| 25. | Mahon JL, Laupacis A, Hodder RV, McKim DA, Paterson NA, Wood TE et al. Theophylline for irreversible chronic airflow limitation: a randomized study comparing n of 1 trials to standard practice. <i>Chest</i> 1999; 115(1):38-48.                              |
| 26. | Bollert FG, Paton JY, Marshall TG, Calvert J, Greening AP, Innes JA. Recombinant DNase in cystic fibrosis: a protocol for targeted introduction through n-of-1 trials. <i>Scottish Cystic Fibrosis Group. European Respiratory Journal</i> 1999; 13(1):107-113. |
| 27. | Kent MA, Camfield CS, Camfield PR. Double-blind methylphenidate trials: practical, useful, and highly endorsed by families. <i>Archives of Pediatrics &amp; Adolescent Medicine</i> 1999; 153(12):1292-1296.                                                    |
| 28. | Webb S, Tansey P, Brown H, Jackson A, Bilton D. Placebo-controlled n-of-1 trials in cystic fibrosis. <i>European Respiratory Journal</i> 1999; 14(4):993.                                                                                                       |
| 29. | Haines DR, Gaines SP. N of 1 randomised controlled trials of oral ketamine in patients with chronic pain. <i>Pain</i> 1999; 83(2):283-287.                                                                                                                      |
| 30. | Sheather-Reid RB, Cohen M. Efficacy of analgesics in chronic pain: a series of N-of-1 studies. <i>Journal of Pain &amp; Symptom Management</i> 1998; 15(4):244-252.                                                                                             |
| 31. | Camfield P, Gordon K, Dooley J, Camfield C. Melatonin appears ineffective in children with intellectual deficits and fragmented sleep: six "N of 1" trials. <i>Journal of Child Neurology</i> 1996; 11(4):341-343.                                              |
| 32. | Mahon J, Laupacis A, Donner A, Wood T. Randomised study of n of 1 trials versus standard practice.[Erratum appears in <i>BMJ</i> 1996 Jun 1;312(7043):1392]. <i>BMJ</i> 1996; 312(7038):1069-1074.                                                              |
| 33. | Maier W, Benkert O. Treatment of chronic depression with sulpiride: evidence of efficacy in placebo-controlled single case studies. <i>Psychopharmacology</i> 1994; 115(4):495-501.                                                                             |
| 34. | McQuay HJ, Carroll D, Jadad AR, Glynn CJ, Jack T, Moore RA et al. Dextromethorphan for the treatment of neuropathic pain: a double-blind randomised controlled crossover trial with integral n-of-1 design. <i>Pain</i> 1994; 59(1):127-133.                    |
| 35. | March L, Irwig L, Schwarz J, Simpson J, Chock C, Brooks P. n of 1 trials comparing a non-steroidal anti-inflammatory drug with paracetamol in osteoarthritis. <i>BMJ</i> 1994; 309(6961):1041-1045.                                                             |
| 36. | Denburg SD, Carbotte RM, Denburg JA. Corticosteroids and neuropsychological functioning in                                                                                                                                                                      |

|     |                                                                                                                                                                                                                                                                                                             |
|-----|-------------------------------------------------------------------------------------------------------------------------------------------------------------------------------------------------------------------------------------------------------------------------------------------------------------|
|     | patients with systemic lupus erythematosus. <i>Arthritis &amp; Rheumatism</i> 1994; 37(9):1311-1320.                                                                                                                                                                                                        |
| 37. | Privitera MD, Treiman DM, Pledger GW, Sahlroot JT, Handforth A, Linde MS et al. Dezinamide for partial seizures: results of an n-of-1 design trial. <i>Neurology</i> 1994; 44(8):1453-1458.                                                                                                                 |
| 38. | Langer JC, Winthrop AL, Issenman RM. The single-subject randomized trial. A useful clinical tool for assessing therapeutic efficacy in pediatric practice. <i>Clinical Pediatrics</i> 1993; 32(11):654-657.                                                                                                 |
| 39. | Molloy DW, Guyatt GH, Standish T, Willan A, McIlroy W, D'Souza J et al. Effect of a new nootropic agent, CGS 5649B, on cognition, function, and behavior in dementia. <i>Journal of General Internal Medicine</i> 1993; 8(8):444-447.                                                                       |
| 40. | Johannessen T, Petersen H, Kristensen P, Fosstvedt D, Kleveland PM, Dybdahl J et al. Cimetidine on-demand in dyspepsia. Experience with randomized controlled single-subject trials. <i>Scandinavian Journal of Gastroenterology</i> 1992; 27(3):189-195.                                                   |
| 41. | Johannessen T, Kristensen P, Petersen H, Fosstvedt D, Loge I, Kleveland PM et al. The symptomatic effect of 1-day treatment periods with cimetidine in dyspepsia. Combined results from randomized, controlled, single-subject trials. <i>Scandinavian Journal of Gastroenterology</i> 1991; 26(9):974-980. |
| 42. | Patel A, Jaeschke R, Guyatt GH, Keller JL, Newhouse MT. Clinical usefulness of n-of-1 randomized controlled trials in patients with nonreversible chronic airflow limitation. <i>American Review of Respiratory Disease</i> 1991; 144(4):962-964.                                                           |
| 43. | Larsen S, Farup P, Flaten O, Osnes M. The multi-crossover model for classifying patients as responders to a given treatment. <i>Scandinavian Journal of Gastroenterology</i> 1991; 26(7):763-770.                                                                                                           |
| 44. | Jaeschke R, Adachi J, Guyatt G, Keller J, Wong B. Clinical usefulness of amitriptyline in fibromyalgia: the results of 23 N-of-1 randomized controlled trials. <i>Journal of Rheumatology</i> 1991; 18(3):447-451.                                                                                          |
| 45. | Hinderer SR. The supraspinal anxiolytic effect of baclofen for spasticity reduction. <i>American Journal of Physical Medicine &amp; Rehabilitation</i> 1990; 69(5):254-258.                                                                                                                                 |
| 46. | Lashner BA, Hanauer SB, Silverstein MD. Testing nicotine gum for ulcerative colitis patients. Experience with single-patient trials. <i>Digestive Diseases &amp; Sciences</i> 1990; 35(7):827-832.                                                                                                          |
| 47. | McBride MC. An individual double-blind crossover trial for assessing methylphenidate response in children with attention deficit disorder. <i>Journal of Pediatrics</i> 1988; 113(1:Pt 1):t-45.                                                                                                             |
| 48. | Menard J, Serrurier D, Bautier P, Plouin PF, Corvol P. Crossover design to test antihypertensive drugs with self-recorded blood pressure. <i>Hypertension</i> 1988; 11(2):153-159.                                                                                                                          |
| 49. | Ullmann RK, Sleator EK. Responders, nonresponders, and placebo responders among children with attention deficit disorder. Importance of a blinded placebo evaluation. <i>Clinical Pediatrics</i> 1986; 25(12):594-599.                                                                                      |
| 50. | Wolfe B, Del RE, Weiss SL, Mendelson A, Elbaga TA, Huser FJ et al. Validation of a single-patient drug trial methodology for personalized management of gastroesophageal reflux disease. <i>J Manag Care Pharm</i> 2002; 8(6):459-468.                                                                      |
| 51. | Brookes ST, Biddle L, Paterson C, Woolhead G, Dieppe P. "Me's me and you's you": Exploring patients' perspectives of single patient (n-of-1) trials in the UK. <i>Trials</i> 2007; 8:10.                                                                                                                    |
| 52. | Wallace AE, Kofoed LL. Statistical Analysis of Single Case Studies in the Clinical Setting: The Example of Methylphenidate Trials in Children with Attention-Deficit Hyperactivity Disorder. <i>Journal of Child and Adolescent Psychopharmacology</i> 1994; 4(3):141-150.                                  |
| 53. | Miyazaki S, Nonogi H, Goto Y, Sumiyoshi T, Haze K, Hiramori K. Comparison of the therapeutic efficacy of continuous and intermittent injection of isosorbide dinitrate: a randomized study on unstable angina. <i>Internal Medicine</i> 1995; 34(9):856-862.                                                |
| 54. | Parodi O, Maseri A, Simonetti I. Management of unstable angina at rest by verapamil. A double-blind cross-over study in coronary care unit. <i>British Heart Journal</i> 1979; 41(2):167-174.                                                                                                               |
| 55. | Parodi O, Simonetti I, Michelassi C, Carpeggiani C, Biagini A, L'Abbate A et al. Comparison of verapamil and propranolol therapy for angina pectoris at rest: a randomized, multiple-crossover, controlled trial in the coronary care unit. <i>American Journal of Cardiology</i> 1986; 57(11):899-906.     |

|     |                                                                                                                                                                                                                                                                                        |
|-----|----------------------------------------------------------------------------------------------------------------------------------------------------------------------------------------------------------------------------------------------------------------------------------------|
| 56. | Joy TR, Zou GY, Mahon JL. N-of-1 (single-patient) trials for statin-related myalgia. <i>Annals of internal medicine</i> 2014 Oct 7;161(7):531-2                                                                                                                                        |
| 57. | Lipka AF, Vrinten C, van Zwet EW, Schimmel KJM, Cornel MC, Kuijpers MR, et al. Ephedrine treatment for autoimmune myasthenia gravis. <i>Neuromuscular disorders</i> 2017; 27:259-265.                                                                                                  |
| 58. | McGarry ME, Illek B, Ly NP, Zlock L, Olshansky S, Moreno C, et al. In vivo and in vitro ivacaftor response in cystic fibrosis patients with residual CFTR function: n-of-1 studies. <i>Pediatric pulmonology</i> 2017;52(4):472-9.                                                     |
| 59. | Mitchell GK, Hardy JR, Nikles CJ, Carmont SA, Senior HE, Schluter PJ, et al. The Effect of Methylphenidate on Fatigue in Advanced Cancer: An Aggregated N-of-1 Trial. <i>Journal of pain and symptom management</i> 2015 Sep;50(3):289-96.                                             |
| 60. | Nikles J, Mitchell GK, Hardy J, Agar M, Senior H, Carmont SA, et al. Testing pilocarpine drops for dry mouth in advanced cancer using n-of-1 trials: A feasibility study. <i>Palliative Medicine</i> 2015 Dec;29(10):967-74.                                                           |
| 61. | Nikles J, Mitchell GK, Hardy J, Senior H, Carmont SA, Schluter PJ, et al. Single-patient multiple crossover studies to determine the effectiveness of paracetamol in relieving pain suffered by patients with advanced cancer taking regular opioids: A pilot study. 2016;30(8):800-2. |
| 62. | Nikles J, Mitchell G, McKinlay L, Waugh MC, Epps A, Carmont SA, et al. A series of n-of-1 trials of stimulants in brain injured children. 2017;40(1):11-21.                                                                                                                            |

**Appendix Table 4: Risk of bias assessment**

| Author Yr       | 1. Randomization adequate? | 2. Allocation concealed? | 3. Patient blinded? | 4. Outcome assessor blinded? | 5. run-in period? | 7. Wash-out? | 8. Statistical methods appropriate?* | 9. All randomized participants analyzed? | 10. Incomplete outcome data |
|-----------------|----------------------------|--------------------------|---------------------|------------------------------|-------------------|--------------|--------------------------------------|------------------------------------------|-----------------------------|
| Nikles 2014     | Low                        | Low                      | Low                 | Low                          | High              | High         | Low                                  | High                                     | Low                         |
| Tison 2013      | Unclear                    | Low                      | Low                 | Low                          | High              | Low          | High                                 | Low                                      | Low                         |
| Rascol 2012     | Unclear                    | Unclear                  | Low                 | Low                          | Low               | Low          | Low                                  | High                                     | Low                         |
| Emmanuel 2012   | Unclear                    | Unclear                  | Low                 | Low                          | High              | High         | High                                 | High                                     | Low                         |
| Yelland 2009    | Low                        | Low                      | Low                 | Low                          | High              | High         | Low                                  | High                                     | Low                         |
| Brookes 2007    | Low                        | Low                      | Low                 | Low                          | High              | High         | unclear                              | High                                     | Low                         |
| Nonoyama2007    | Low                        | Low                      | Low                 | Low                          | High              | High         | unclear                              | High                                     | Low                         |
| Huber 2007      | Low                        | Low                      | Low                 | Low                          | High              | Low          | High                                 | Low                                      | Low                         |
| Yelland 2007    | Low                        | Unclear                  | Low                 | Low                          | High              | High         | Low                                  | High                                     | Low                         |
| Zucker 2006     | Low                        | Unclear                  | Low                 | Low                          | Low               | High         | Low                                  | High                                     | Low                         |
| Nikles 2006     | Low                        | Unclear                  | Low                 | Low                          | High              | Low          | High                                 | High                                     | Low                         |
| Nathan 2006     | Low                        | Low                      | Low                 | Low                          | High              | High         | High                                 | High                                     | Low                         |
| Pereira 1995    | Unclear                    | Low                      | Low                 | Low                          | High              | High         | High                                 | Low                                      | Low                         |
| Woodfield 2005  | Low                        | Low                      | Low                 | Low                          | Low               | Low          | Low                                  | Low                                      | Low                         |
| Wegman 2005     | Low                        | Unclear                  | Low                 | Low                          | High              | High         | Low                                  | High                                     | Low                         |
| Nikles 2005     | Low                        | Unclear                  | Low                 | Low                          | High              | Low          | High                                 | High                                     | Low                         |
| Smith 2004      | Low                        | Low                      | Low                 | Low                          | Low               | High         | Low                                  | High                                     | Low                         |
| Haas 2004       | Low                        | Low                      | Low                 | Low                          | High              | High         | Low                                  | High                                     | Low                         |
| Mandelcorn 2004 | Low                        | Unclear                  | Low                 | Low                          | Low               | High         | High                                 | Low                                      | Low                         |
| Pope 2004       | Unclear                    | High                     | Low                 | Low                          | High              | High         | Low                                  | Low                                      | Low                         |
| Wegman 2003     | Low                        | Low                      | Low                 | Low                          | High              | High         | Low                                  | High                                     | Low                         |



1  
2  
3  
4  
5  
6  
7  
8  
9  
10  
11  
12  
13  
14  
15  
16  
17  
18  
19  
20  
21  
22  
23  
24  
25  
26  
27  
28  
29  
30  
31  
32  
33  
34  
35  
36  
37  
38  
39  
40  
41  
42  
43  
44  
45  
46  
47

|                    |         |         |      |      |         |      |      |      |     |
|--------------------|---------|---------|------|------|---------|------|------|------|-----|
| Wolfe 2002         | Low     | Low     | Low  | Low  | High    | Low  | Low  | High | Low |
| Reitberg 2002      | Low     | Low     | Low  | Low  | Low     | High | Low  | Low  | Low |
| Lindsay 2001       | Unclear | Low     | Low  | Low  | Low     | High | High | High | Low |
| Duggan 2000        | Unclear | Unclear | Low  | Low  | High    | High | High | Low  | Low |
| Nikles 2000        | Unclear | Unclear | Low  | Low  | High    | High | High | High | Low |
| Mahon 1999         | Low     | Unclear | Low  | Low  | High    | Low  | High | High | Low |
| Bollert 1999       | Unclear | Unclear | Low  | Low  | High    | High | High | High | Low |
| Kent 1999          | Unclear | Unclear | Low  | Low  | High    | High | High | Low  | Low |
| Webb 1999          | Unclear | Unclear | Low  | Low  | Low     | Low  | High | High | Low |
| Haines 1999        | Unclear | Unclear | Low  | Low  | Low     | Low  | Low  | High | Low |
| Sheather-Reid 1998 | Unclear | Unclear | Low  | Low  | High    | High | Low  | High | Low |
| Camfield 1996      | Unclear | Unclear | Low  | Low  | High    | High | High | Low  | Low |
| Mahon 1996         | Low     | Unclear | Low  | Low  | High    | High | High | Low  | Low |
| Miyazaki 1995      | Unclear | High    | High | High | High    | High | High | High | Low |
| Maier 1994         | Unclear | Unclear | Low  | Low  | Low     | Low  | Low  | High | Low |
| McQuay 1994        | Low     | Low     | Low  | Low  | High    | High | High | High | Low |
| March 1994         | Unclear | Unclear | Low  | Low  | High    | High | Low  | High | Low |
| Denburg 1994       | Unclear | Unclear | Low  | Low  | Low     | Low  | High | High | Low |
| Privitera 1994     | Unclear | Unclear | Low  | Low  | High    | High | High | Low  | Low |
| Wallace 1994       | High    | Unclear | Low  | Low  | High    | High | High | Low  | Low |
| Langer 1993        | Low     | Low     | Low  | Low  | High    | High | High | Low  | Low |
| Molloy 1993        | Unclear | Unclear | Low  | Low  | Low     | Low  | Low  | High | Low |
| Johannessen 1992   | Unclear | Unclear | Low  | Low  | High    | Low  | High | High | Low |
| Johannessen 1991   | Unclear | Unclear | Low  | Low  | High    | High | Low  | Low  | Low |
| Patel 1991         | Unclear | Unclear | Low  | Low  | High    | High | High | Low  | Low |
| Larsen 1991        | Unclear | Unclear | Low  | Low  | High    | High | High | High | Low |
| Jaeschke 1991      | Unclear | Unclear | Low  | Low  | low     | High | High | High | low |
| Hinderer 1990      | Unclear | Unclear | Low  | Low  | low     | High | high | low  | low |
| Lashner 1990       | Unclear | Low     | Low  | Low  | Unclear | High | high | low  | low |

|               |         |         |     |     |         |      |      |      |      |
|---------------|---------|---------|-----|-----|---------|------|------|------|------|
| McBride 1988  | Low     | Low     | Low | Low | Unclear | High | high | low  | High |
| Menard 1988   | Low     | Unclear | Low | Low | Low     | low  | low  | low  | High |
| Ullmann 1986  | Low     | Unclear | Low | Low | Unclear | High | low  | low  | High |
| Parodi 1986   | Low     | Unclear | Low | Low | low     | Low  | low  | low  | low  |
| Parodi 1979   | Unclear | Unclear | Low | Low | low     | High | High | low  | low  |
| Joy 2014      | Low     | Unclear | Low | Low | High    | Low  | low  | low  | low  |
| Lipka 2017    | Low     | Low     | Low | Low | High    | Low  | High | low  | low  |
| Mitchell 2015 | Low     | Low     | Low | Low | High    | Low  | High | low  | low  |
| Nikles 2015   | Low     | Low     | Low | Low | High    | Low  | High | low  | low  |
| Nikles 2017   | Low     | Low     | Low | Low | High    | Low  | low  | High | low  |
| Nikles 2016   | Low     | Unclear | Low | Low | High    | High | High | low  | High |
| McGarry 2017  | Low     | Low     | Low | Low | Low     | Low  | High | High | High |

\* Statistical methods used to account for carryover effect, period effects, and intra-subject correlation

Appendix Figure 1: Patients with chronic intestinal pseudo-obstruction treated with prucalopride or placebo for pain relief<sup>1</sup>

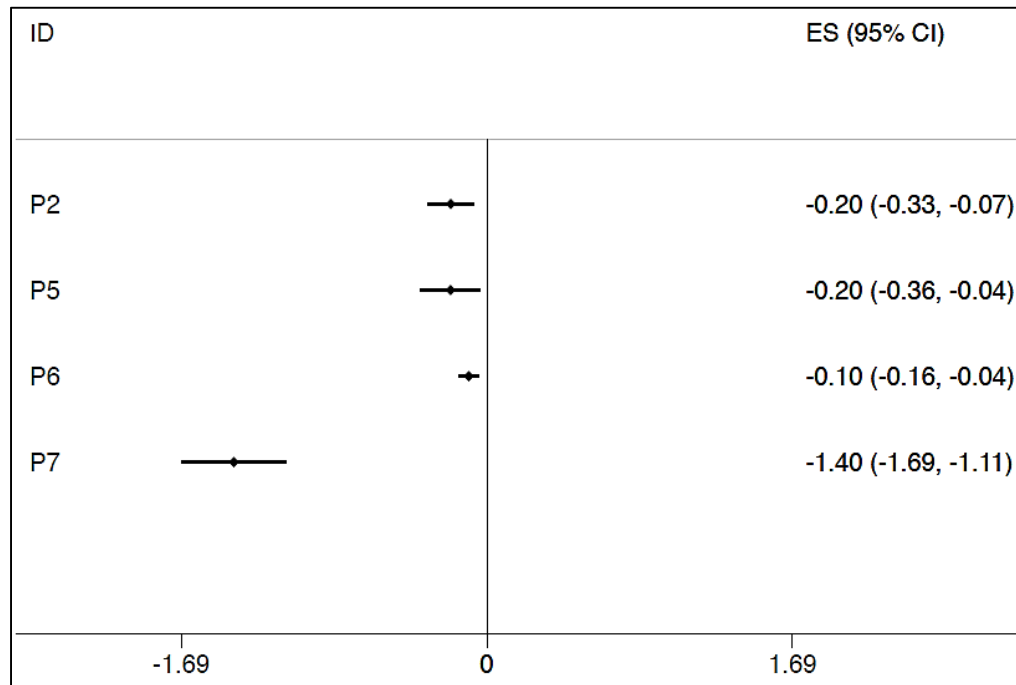

Appendix Figure 1 Legend:

Data from this figure was extracted from the study published by Emmanuel et al in 2011, which investigates the use of prucalopride or placebo for pain relief (among other outcomes) in patients with chronic intestinal pseudo-obstruction. The average treatment effect is -0.440 (-0.771 to -0.110).

**Appendix Figure 2: Patients with chronic tension-type headaches treated with dextroamphetamine or control and effect on mean daily grade decrease in headache<sup>2</sup>**

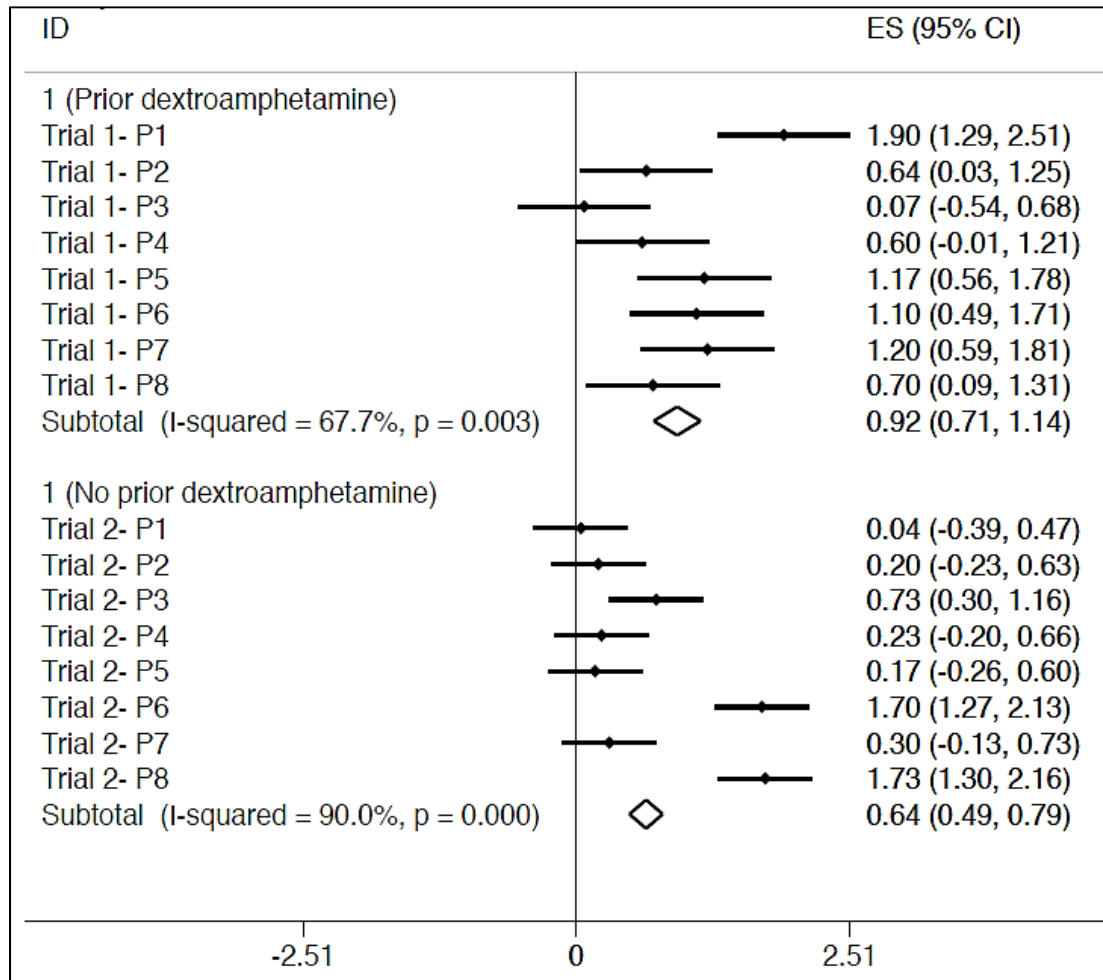

**Appendix Figure 2 Legend:** Data from this figure was extracted from the study published by Haas et al in 2004, which investigates the use of dextroamphetamine or control in patients with chronic-type for improvement on mean daily grade in headache.

**Appendix Figure 3: Patients with migraine headaches treated with dextroamphetamine or control and effect on mean daily grade decrease in headache<sup>2</sup>**

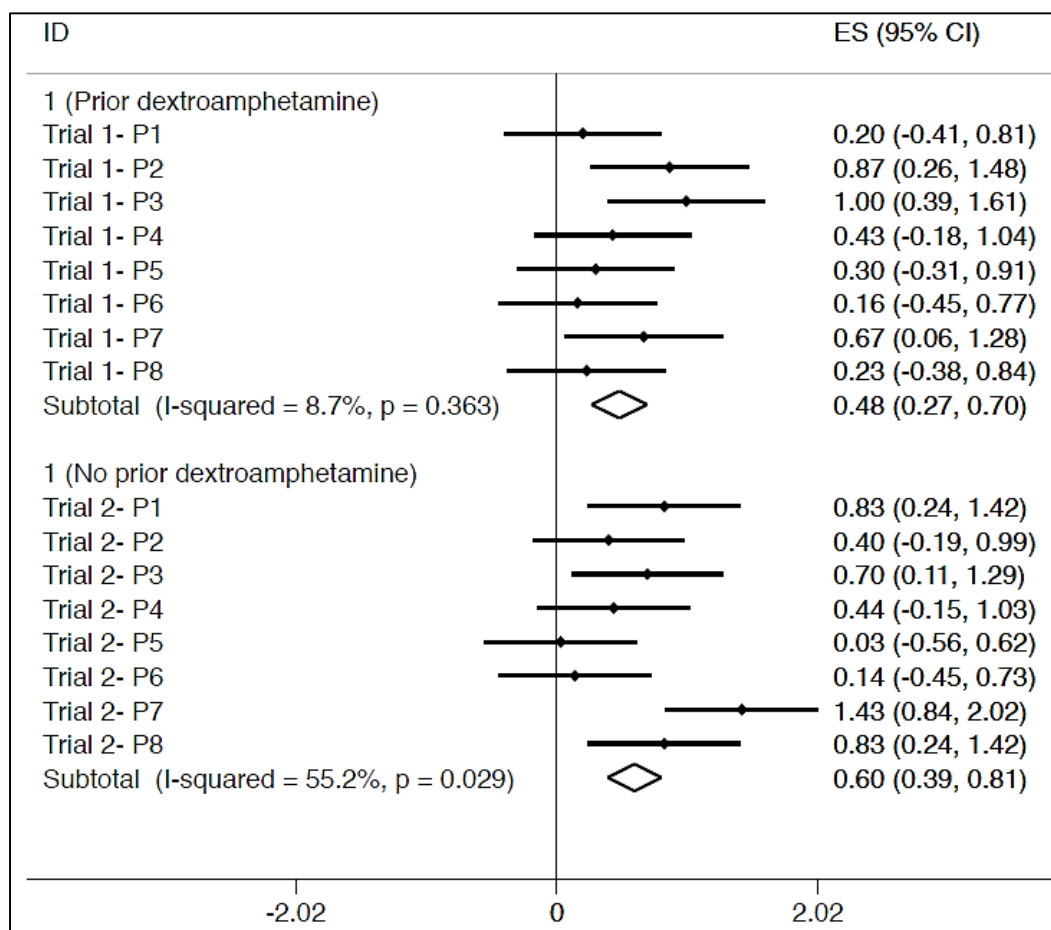

**Appendix Figure 3 Legend:** Data from this figure was extracted from the study published by Haas et al in 2004, which investigates the use of dextroamphetamine or control in patients with chronic-type and migraine headaches for improvement on mean daily grade in headache.

**Appendix Figure 4: Patients with fibromyalgia treated with amitriptyline or placebo and its effect on a 7-point symptom scale<sup>3</sup>**

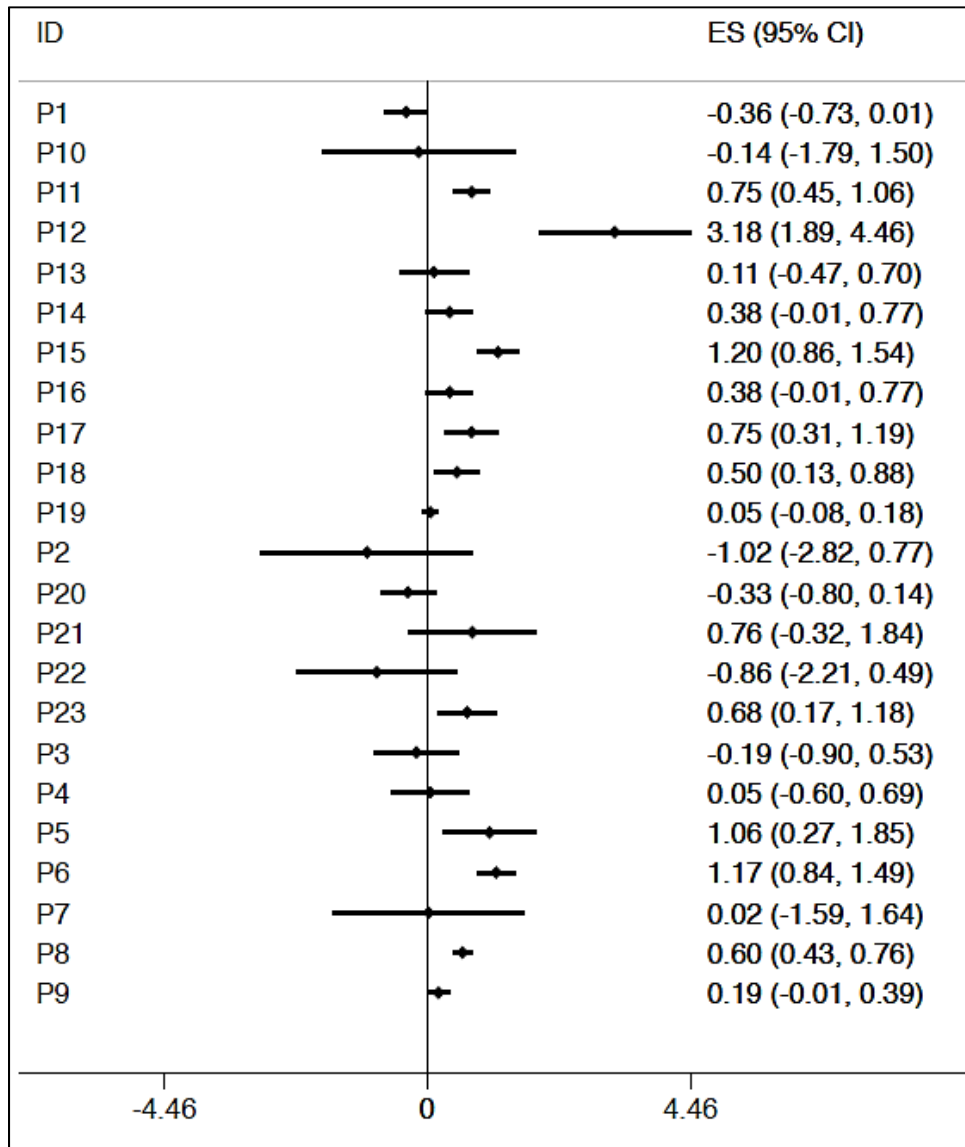

**Appendix Figure 4 Legend:** Data from this figure was extracted from the study published by Jaeschke et al in 1991, which investigates the effect of amitriptyline or placebo on a 7-point symptom scale in patients with fibromyalgia. The average treatment effect is 0.427 (0.210 to 0.645).

**Appendix Figure 5: Patients with fibromyalgia treated with amitriptyline or placebo and its effect on tender point changes count<sup>3</sup>**

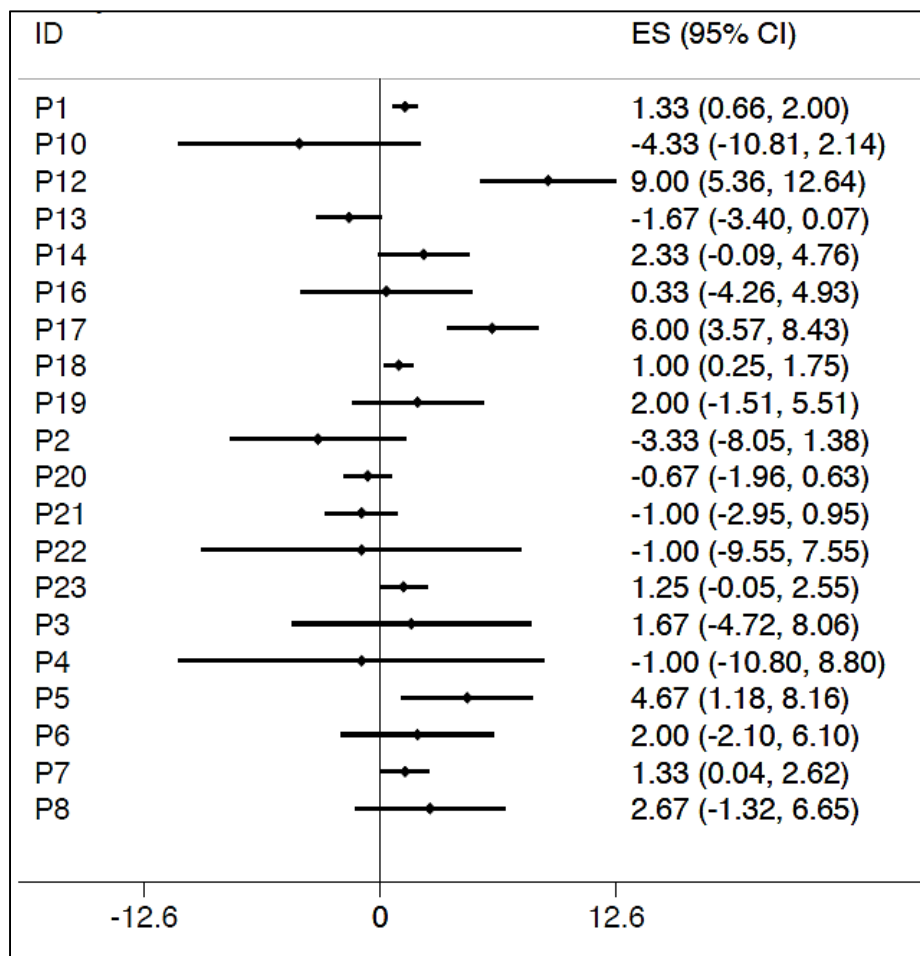

**Appendix Figure 5 Legend:** Data from this figure was extracted from the study published by Jaeschke et al in 1991, which investigates the effect of amitriptyline or placebo on tender point changes count in patients with fibromyalgia. The average treatment effect is 1.320 (0.404 to 2.236).

**Appendix Figure 6: Patients with peptic ulcers, oesophagitis grade I, II, or III, or with reflux or ulcer-like symptom profiles were treated with cimetidine or placebo and its effect on a 6-point symptom scale<sup>4</sup>**

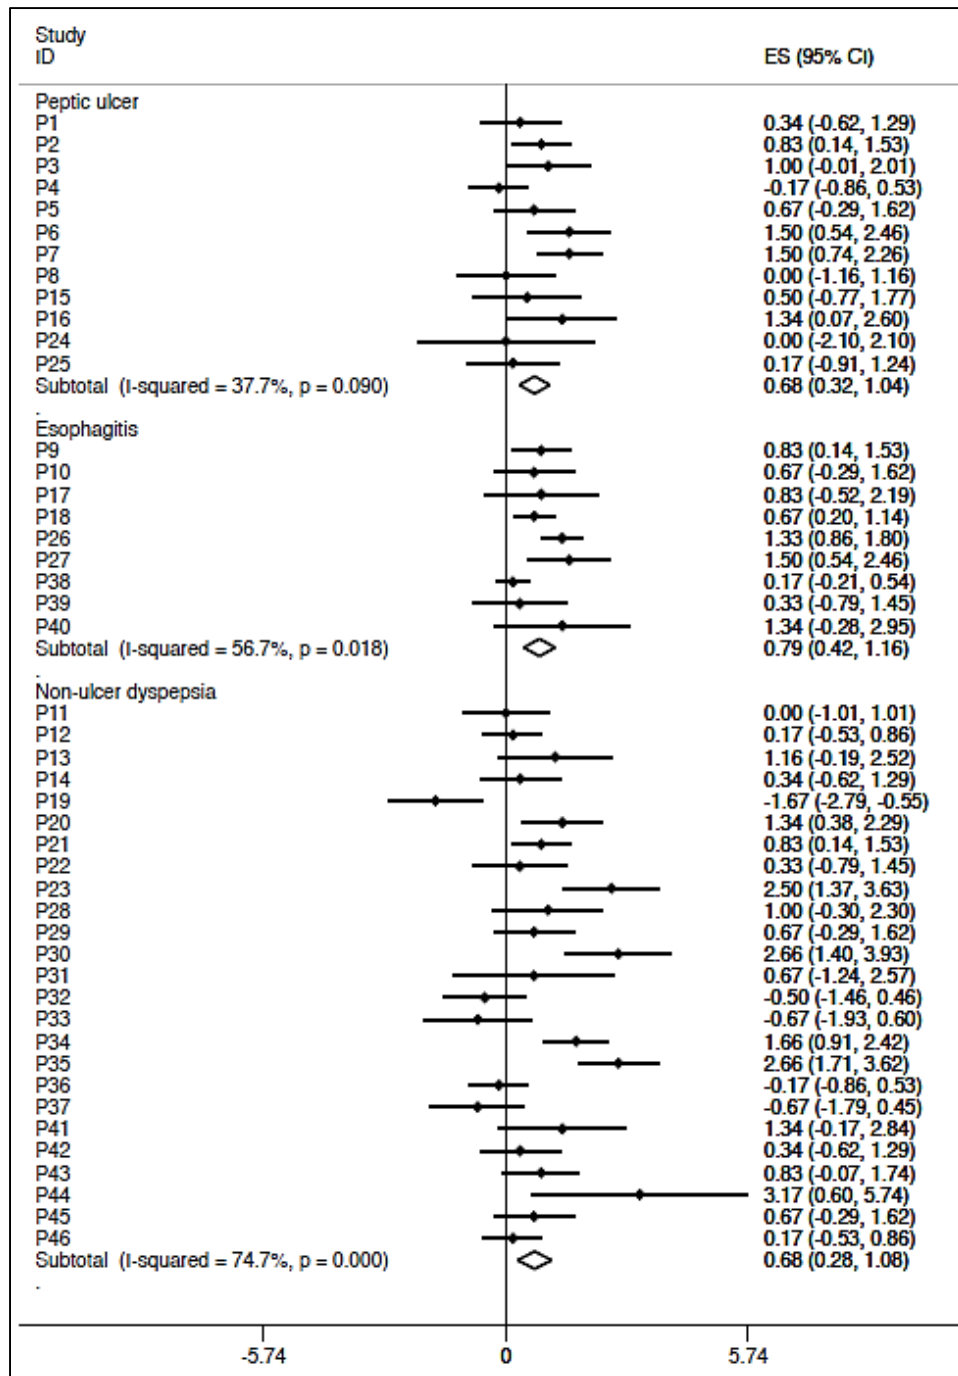

**Appendix Figure 6 Legend:** Data from this figure was extracted from the study published by Johannessen et al in 1992, which investigates the effect of cimetidine or placebo on a 6-point symptom scale in patients with peptic ulcers, oesophagitis grade I, II, or III, or with reflux or ulcer-like symptom profiles. The average treatment effect is 0.698 (0.466 to 0.931).



**Appendix Figure 7: Patients with irreversible chronic airflow limitation treated with theophylline or placebo and its effect on dyspnea<sup>5</sup>**

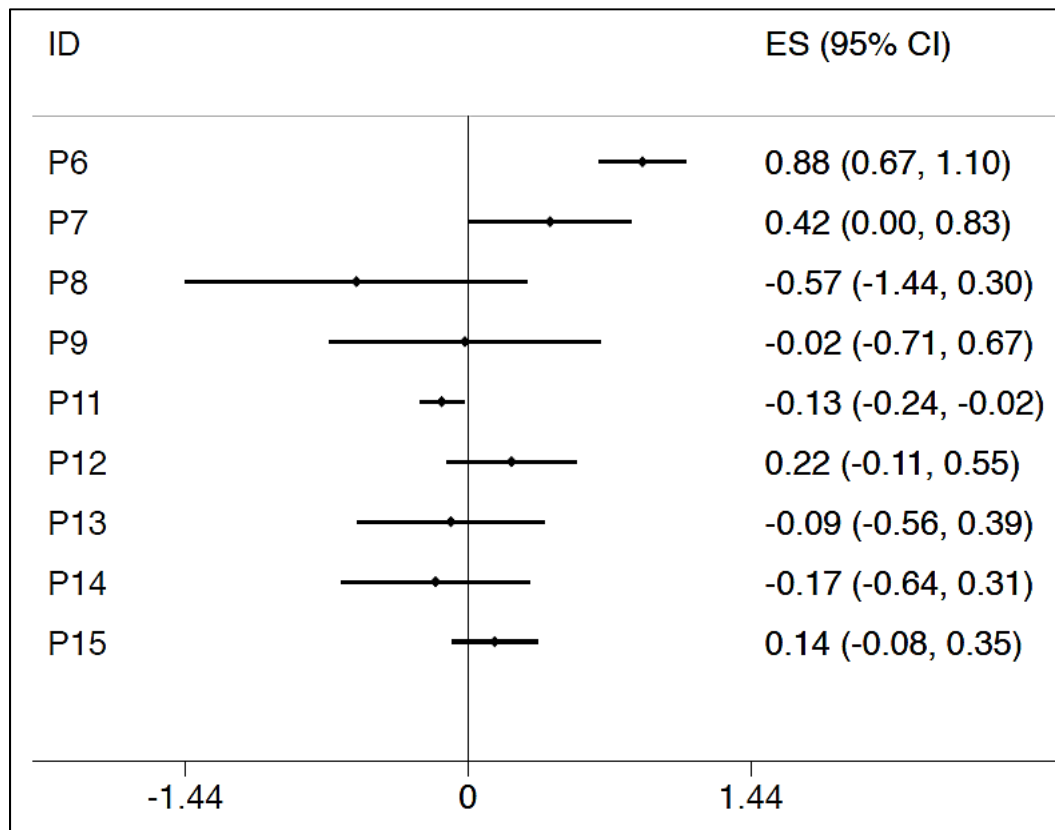

**Appendix Figure 7 Legend:** Data from this figure was extracted from the study published by Mahon et al in 1996, which investigates the effect of theophylline or placebo on dyspnea in patients with irreversible chronic airflow limitation. The average treatment effect is 0.125 (-0.181 to 0.430).

**Appendix Figure 8: Patients with osteoarthritic pain treated with paracetamol and diclofenac and its effect on stiffness<sup>6</sup>**

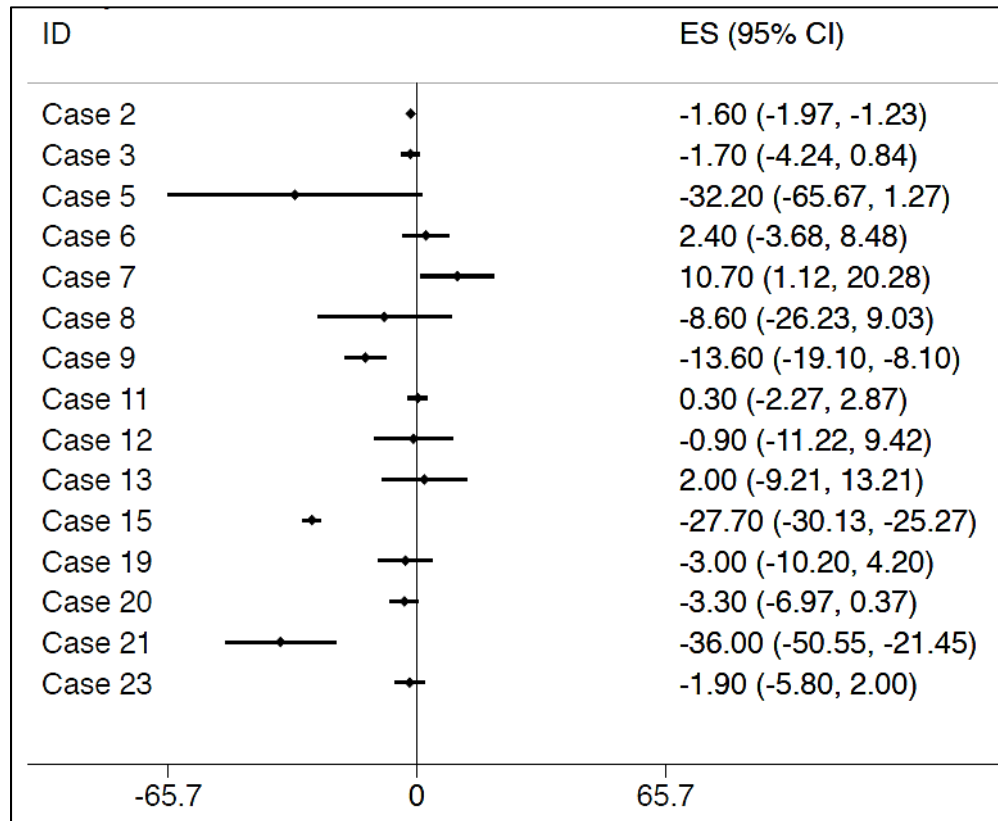

**Appendix Figure 8 Legend:** Data from this figure was extracted from the study published by March et al in 1994, which investigates the effect of paracetamol and diclofenac on stiffness in patients with osteoarthritic pain. The average treatment effect is mean difference in stiffness (mm).

**Appendix Figure 9: Patients with nonreversible chronic airflow limitation treated with either ipratropium bromide, theophylline, salbutamol, or beclomethane (all compared to placebo) and its effect on a 4-item symptom questionnaire<sup>7</sup>**

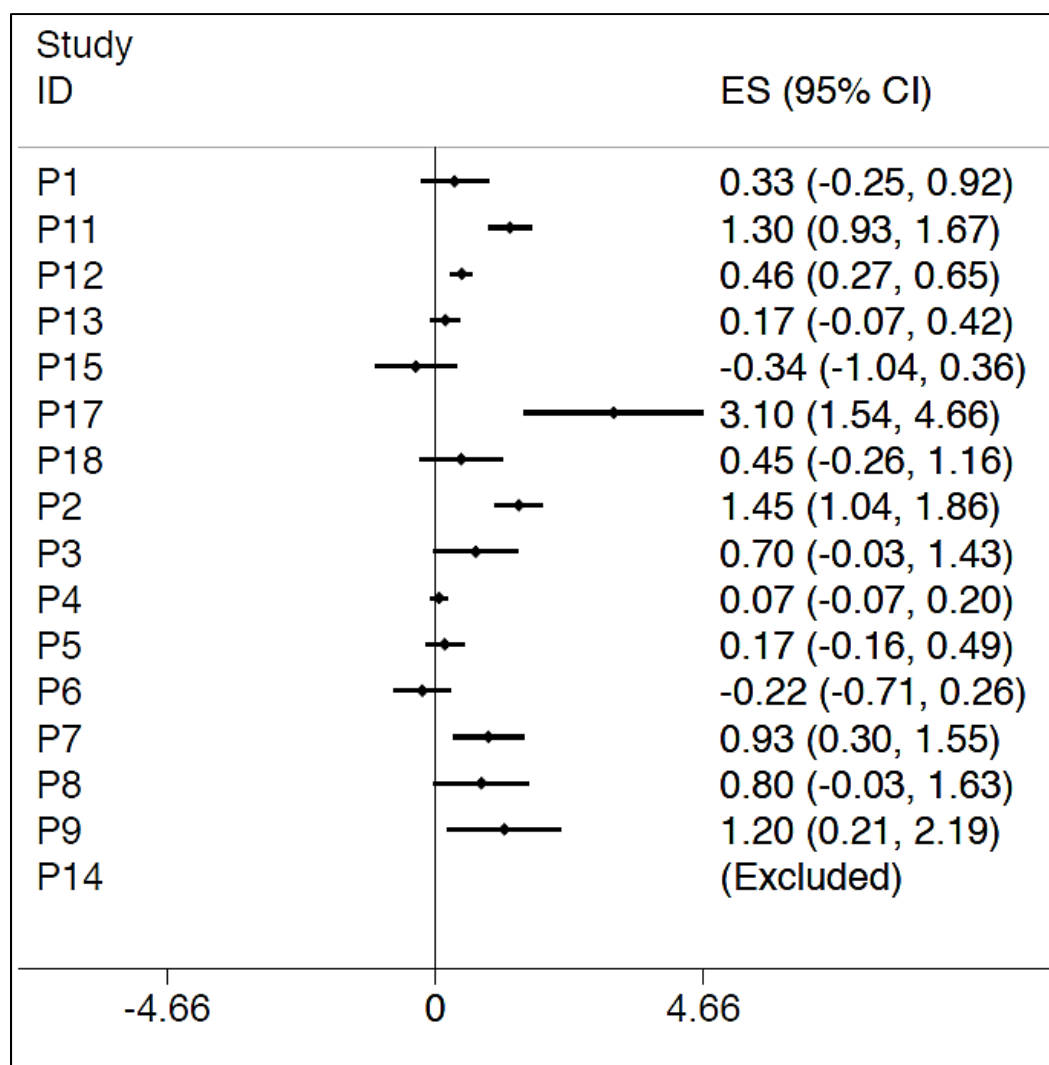

**Appendix Figure 9 Legend:** Data from this figure was extracted from the study published by Patel et al in 1991, which investigates the effect of ipratropium bromide, theophylline, salbutamol, or beclomethane (all compared to placebo) on a 4-item symptom questionnaire in patients with nonreversible chronic airflow limitation. The average treatment effect is 0.240 (0.131 to 0.350).

**Appendix Figure 10: Patients previously taking warfarin for either atrial fibrillation or deep vein thrombosis treated with apo-warfarin and 20coumadin and its effect on international normalized ratio<sup>8</sup>**

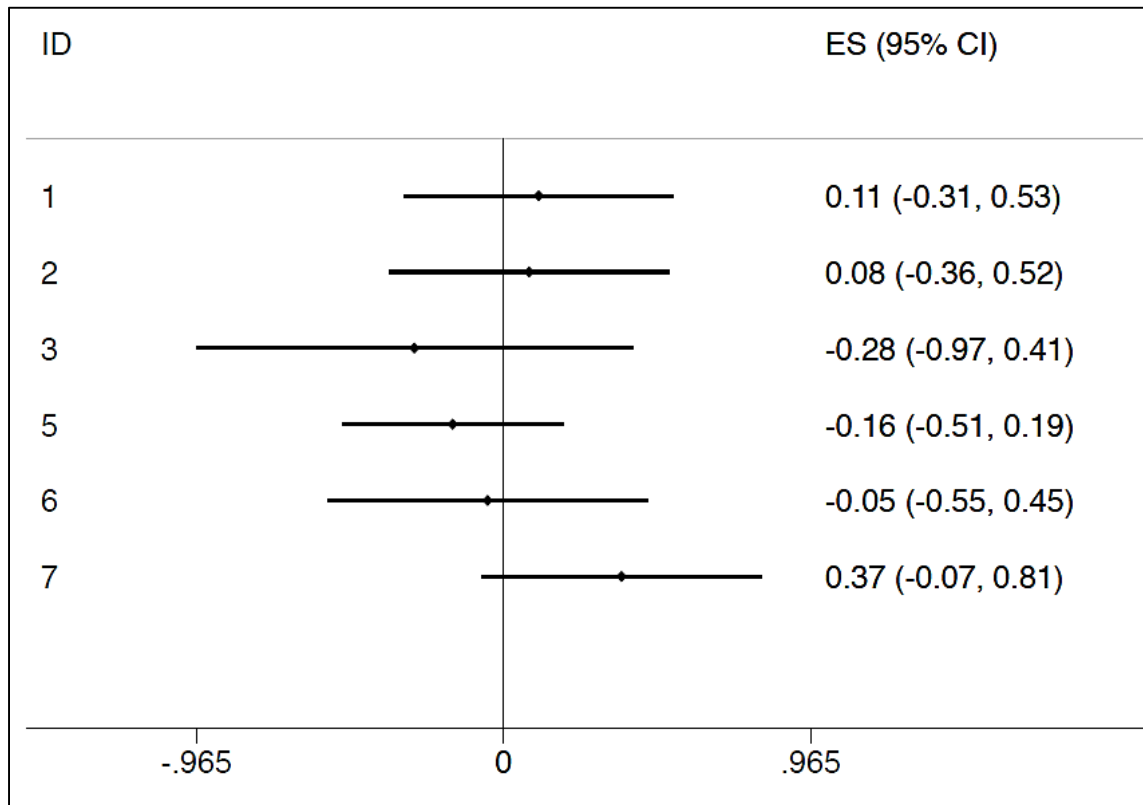

**Appendix Figure 10 Legend:** Data from this figure was extracted from the study published by Pereira et al in 1995, which investigates the effect of apo-warfarin and Coumadin on international normalized ratio in patients previously taking warfarin for either atrial fibrillation or deep vein thrombosis. The average treatment effect is 0.027 (-0.155 to 0.209).

1  
2  
3 **Appendix Figure 11: Hospitalized children and adolescents with attention-deficit hyperactivity**  
4 **disorder treated with methylphenidate and placebo and its effect on Conners 15-item rating scale**  
5 **scores<sup>9</sup>**  
6

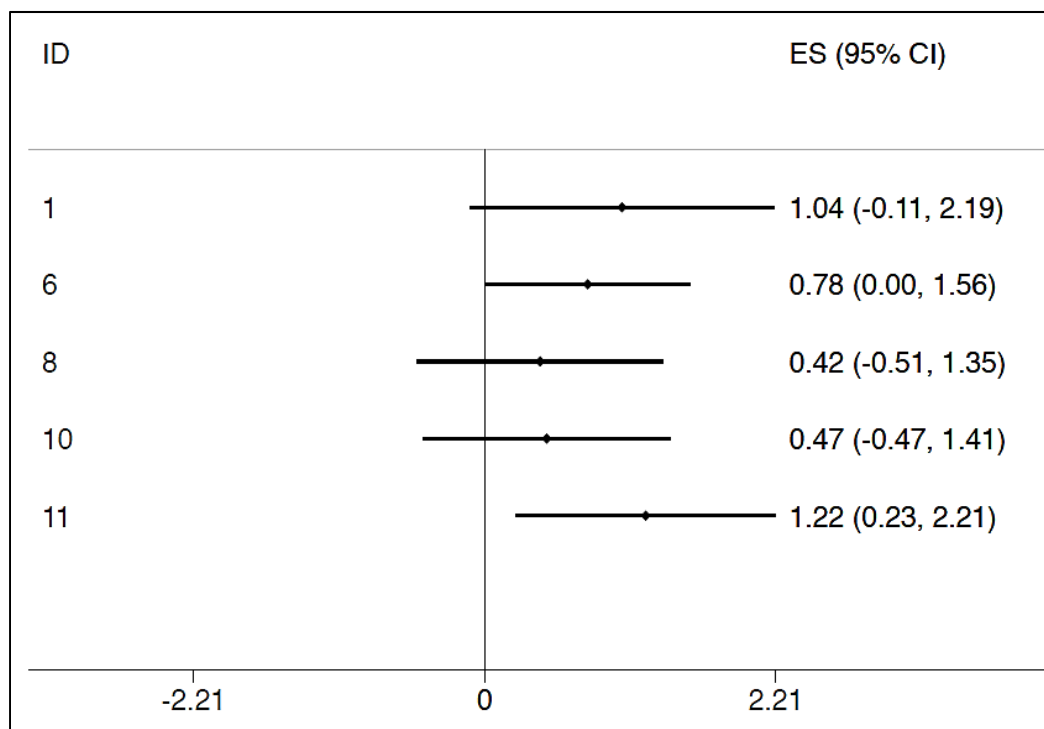

31 **Appendix Figure 11 Legend:** Data from this figure was extracted from the study published by Wallace  
32 et al in 1994, which investigates the effect of methylphenidate and placebo on Conners 15-item rating  
33 scale scores in hospitalized children and adolescents with attention-deficit hyperactivity disorder. The  
34 average treatment effect is 0.759 (0.341 to 1.178).  
35  
36  
37  
38  
39  
40  
41  
42  
43  
44  
45  
46  
47  
48  
49  
50  
51  
52  
53  
54  
55  
56  
57  
58  
59  
60

Appendix Figure 12: Patients already prescribed quinine treated with quinine sulphate and placebo, and its effect on changes in number of cramps<sup>10</sup>

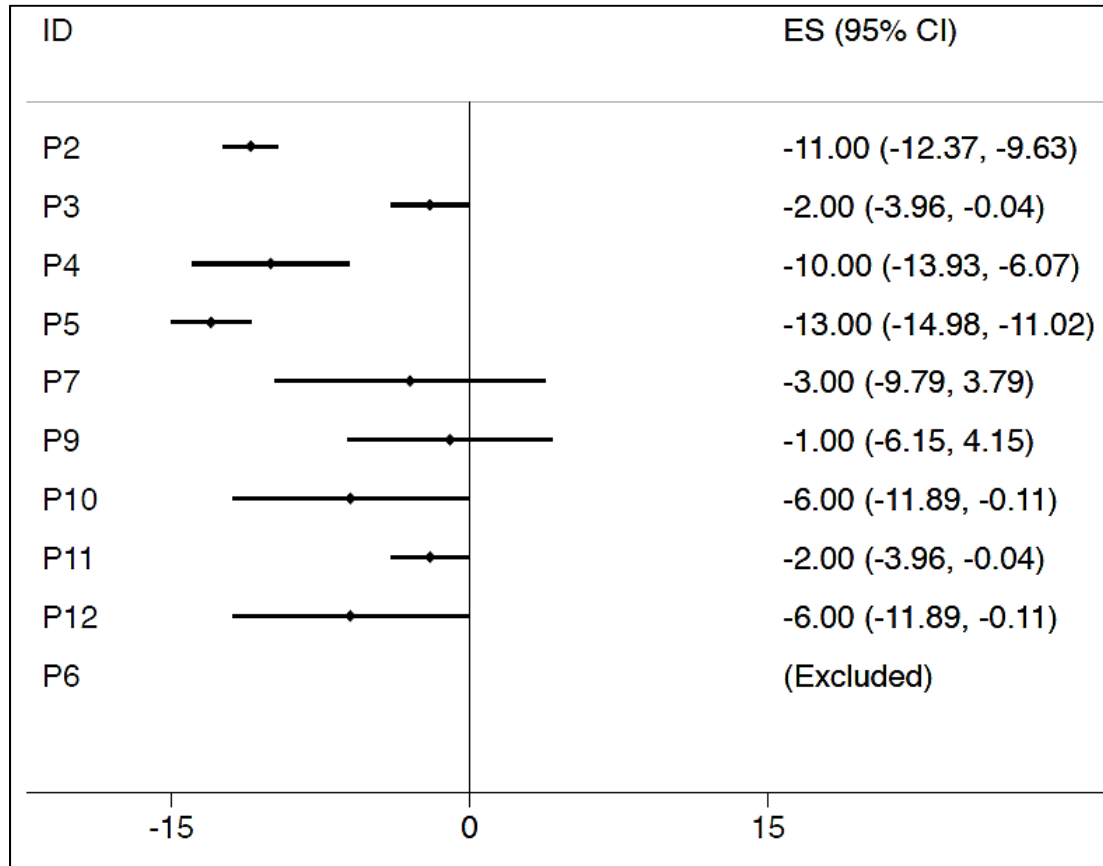

**Appendix Figure 12 Legend:** Data from this figure was extracted from the study published by Woodfield et al in 2005, which investigates the effect of quinine sulphate and placebo on changes in number of cramps in patients already prescribed quinine. The average treatment effect is -18.823 (-28.527 to -9.120).

**Appendix Figure 13: Patients already prescribed quinine treated with quinine sulphate and placebo, and its effect on total days with cramps<sup>10</sup>**

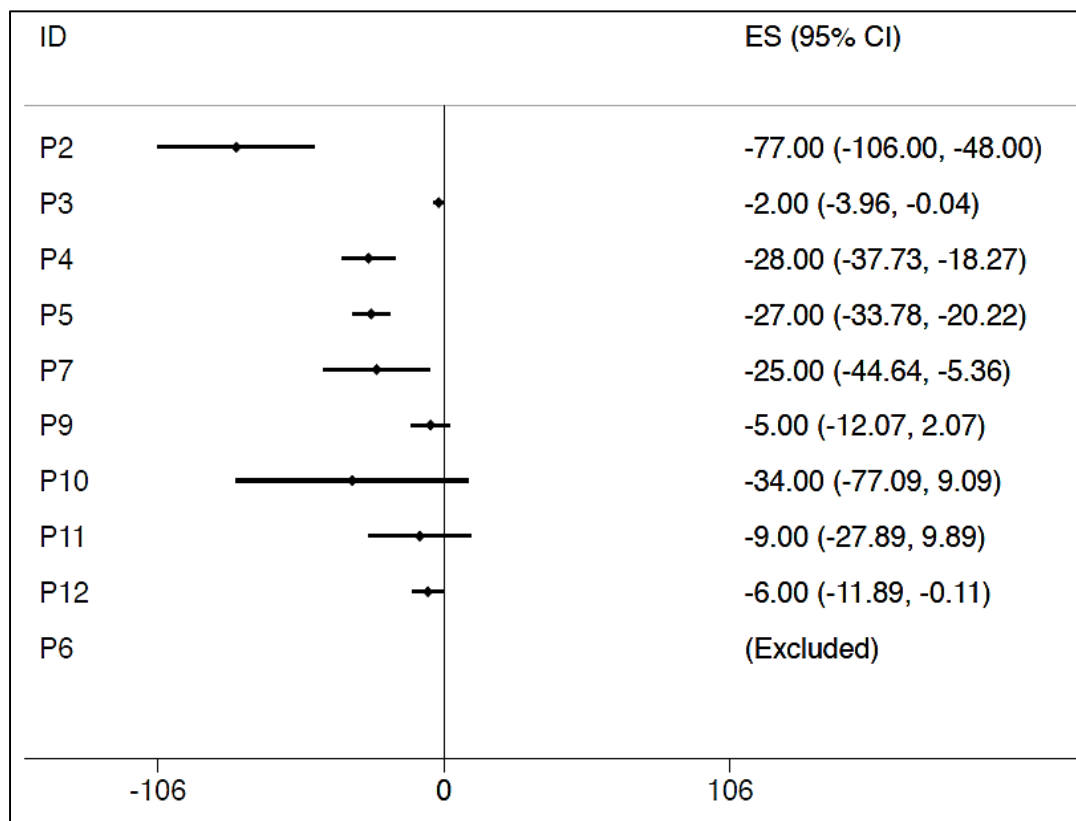

**Appendix Figure 13 Legend:** Data from this figure was extracted from the study published by Woodfield et al in 2005, which investigates the effect of quinine sulphate and placebo on total days with cramps in patients already prescribed quinine. The average treatment effect is -6.181 (-9.798 to -2.563).

**Appendix Figure 14: Patients with fibromyalgia syndrome treated with amitriptyline and the combination amitriptyline and fluoxetine and its effect on the Fibromyalgia Impact Questionnaire<sup>11</sup>**

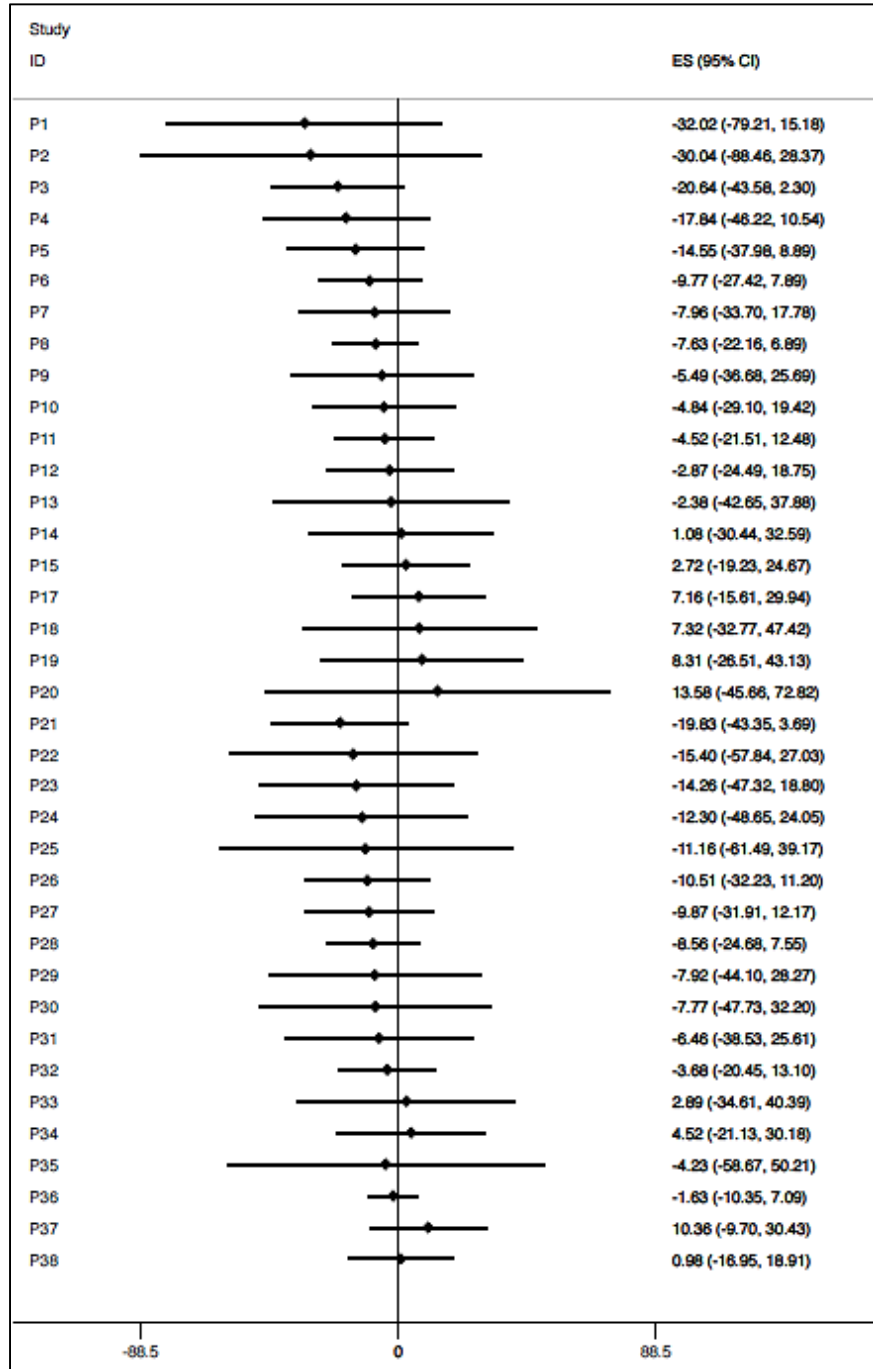

**Appendix Figure 14 Legend:** Data from this figure was extracted from the study published by Zucker et al in 2006, which investigates the effect of amitriptyline and the combination amitriptyline and fluoxetine on Fibromyalgia Impact Questionnaire in patients with fibromyalgia syndrome. The average treatment effect is -5.019 (-8.784 to -1.254).



**Appendix 15: Patients with prior statin-related myalgia with or without mild elevation of creatine kinase levels treated with statin and placebo and its effects on VAS myalgia score<sup>12</sup>**

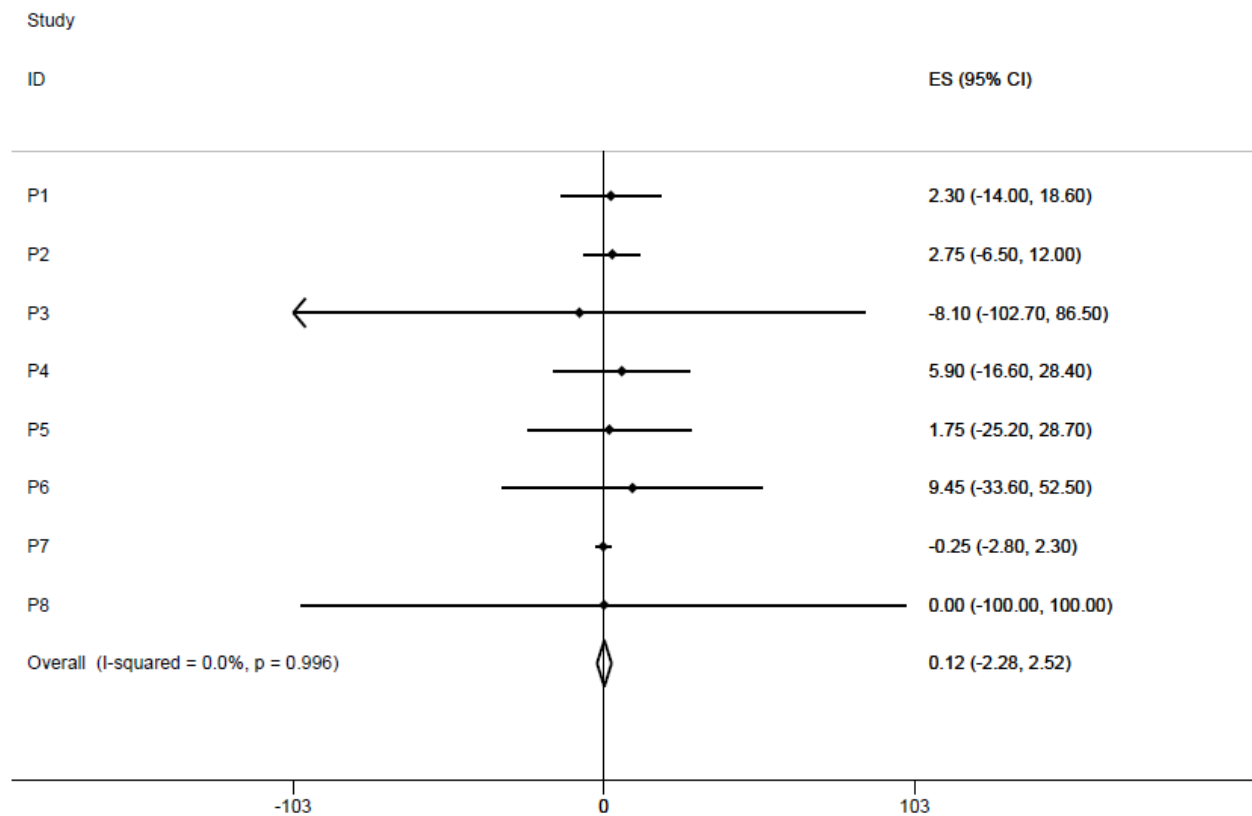

**Appendix 15 Figure Legend:** Data from this figure was extracted from the study published by Joy et al in 2014, which investigates the effect of statin versus placebo on VAS myalgia score in patients with hyperlipidemia. The average treatment effect is 0.12 (-2.28 to 2.52).

**Appendix Figure 16: Patients with myasthenia gravis with acetylcholine receptor antibodies treated with ephinpheerin and placebo and its effect on QMG score<sup>13</sup>**

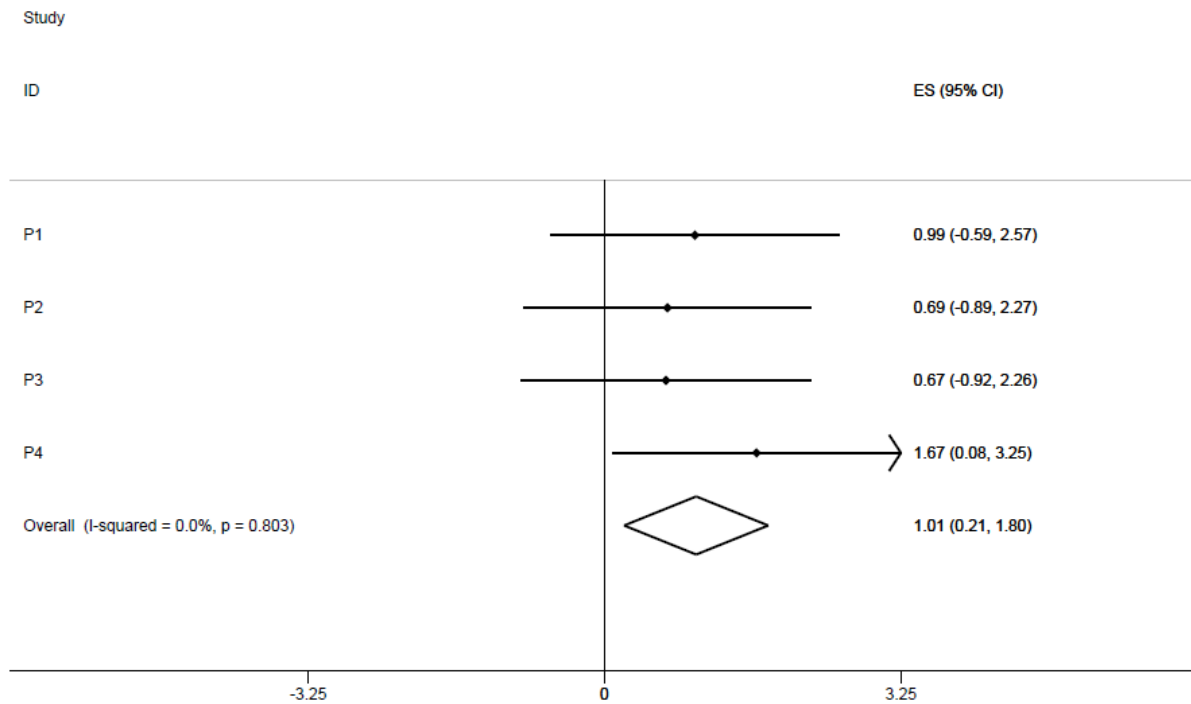

**Appendix Figure 16 Legend:** Data from this figure was extracted from the study published by Lipkin et al in 2017, which investigates the effect of with ephinpheerin and placebo and its effect on QMG score in patients with autoimmune myasthenia gravia. The average treatment effect is 1.01 (0.21 to 1.80).

**Appendix Figure 17: Children with mental retardation and fragmented sleep treated with melatonin and placebo and its effect on nights without awakening<sup>14</sup>**

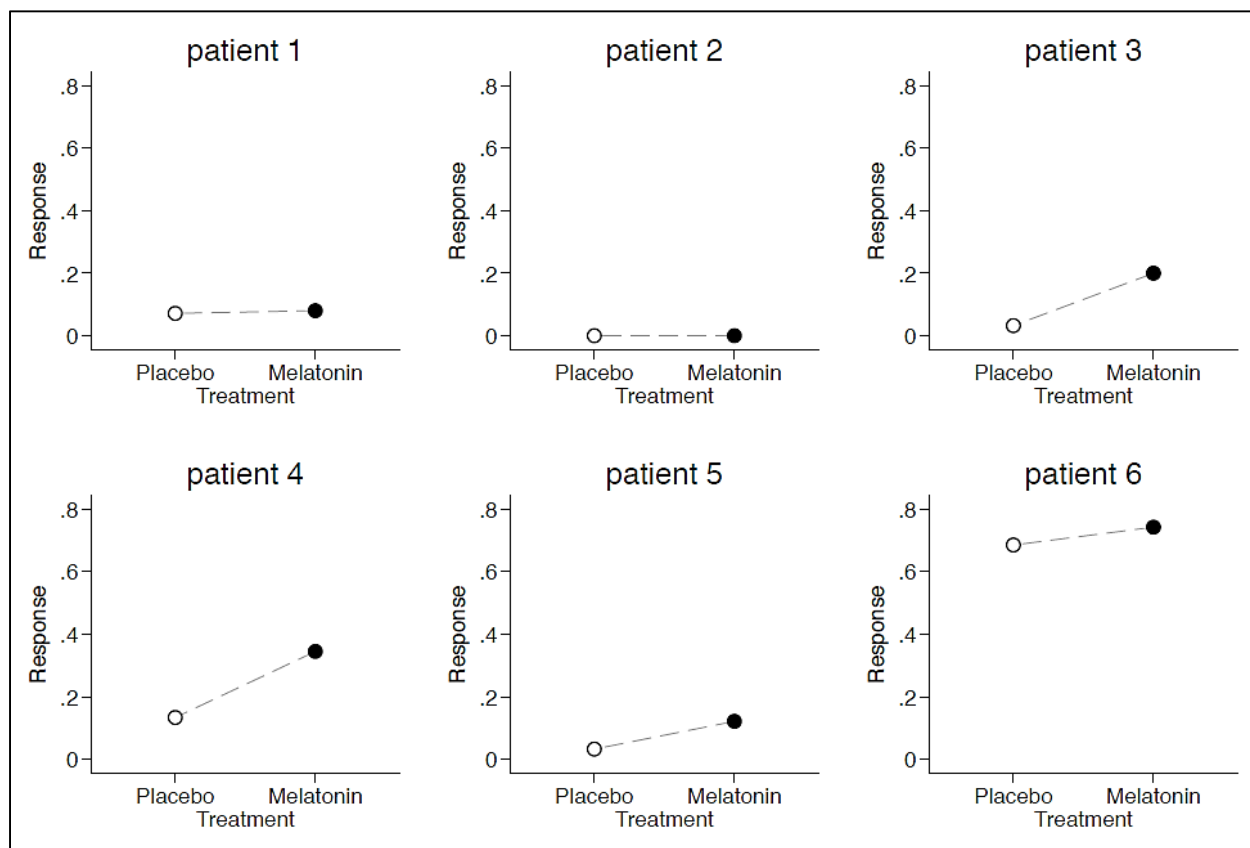

**Appendix Figure 17 Legend:** Data from this figure was extracted from the study published by Camfield et al in 1996, which investigates the effect of melatonin and placebo on nights without awakening in children with mental retardation and fragmented sleep. The average treatment effect is 0.84 (0.20 to 1.48). White circles indicate placebo; black circles indicate melatonin.

**Appendix Figure 18: Patients with traumatic spinal cord lesions treated with baclofen and placebo and its effect on anxiety<sup>15</sup>**

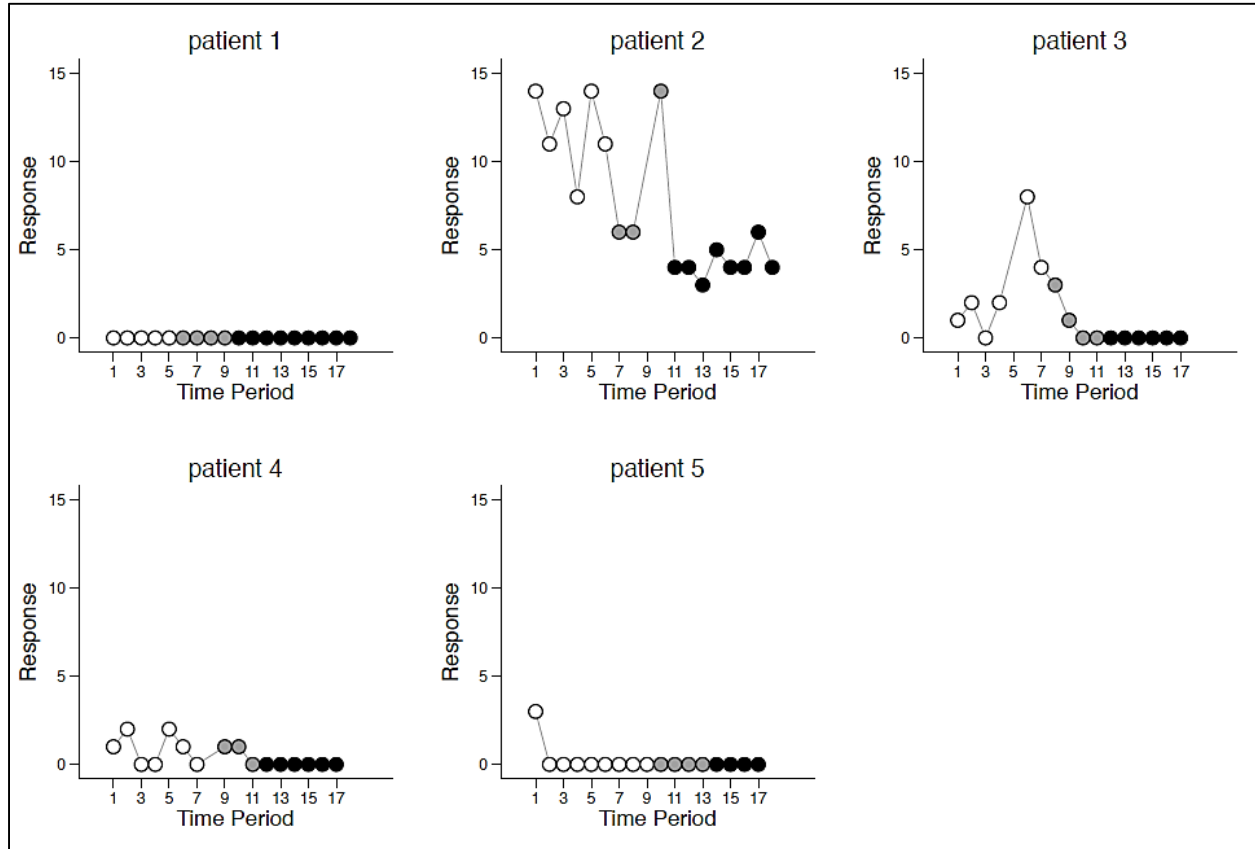

**Appendix Figure 18 Legend:** Data from this figure was extracted from the study published by Hinderer et al in 1990, which investigates the effect of baclofen and placebo on anxiety in patients with traumatic spinal cord lesions. The average treatment effect is -1.06 (-1.88 to -0.23). White circles indicate placebo; grey circles indicate a half dose (40 mg/day) of baclofen; black circles indicate a full dose (80 mg/day) of baclofen.

Appendix Figure 19: Children with gastroesophageal reflux treated with cisapride and placebo and its effect on emetic episodes per day<sup>16</sup>

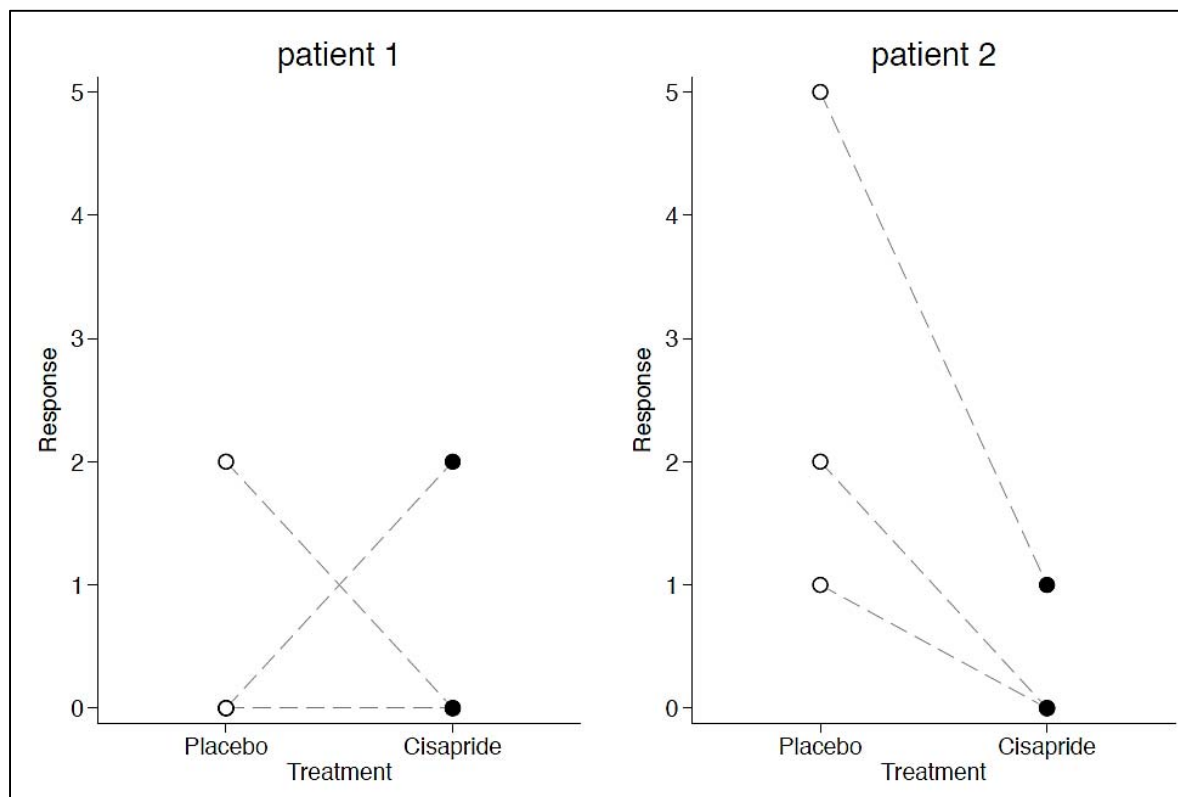

Appendix Figure 19 Legend: Data from this figure was extracted from the study published by Langer et al in 1993, which investigates the effect of cisapride and placebo on emetic episodes per day in children with gastroesophageal reflux. The average treatment effect is -1.20 (-2.49 to 0.09). White circles indicate placebo; black circles indicate cisapride.

Appendix Figure 20: Nonsmokers with ulcerative colitis treated with nicotine gum and placebo and its effect on abdominal pain<sup>17</sup>

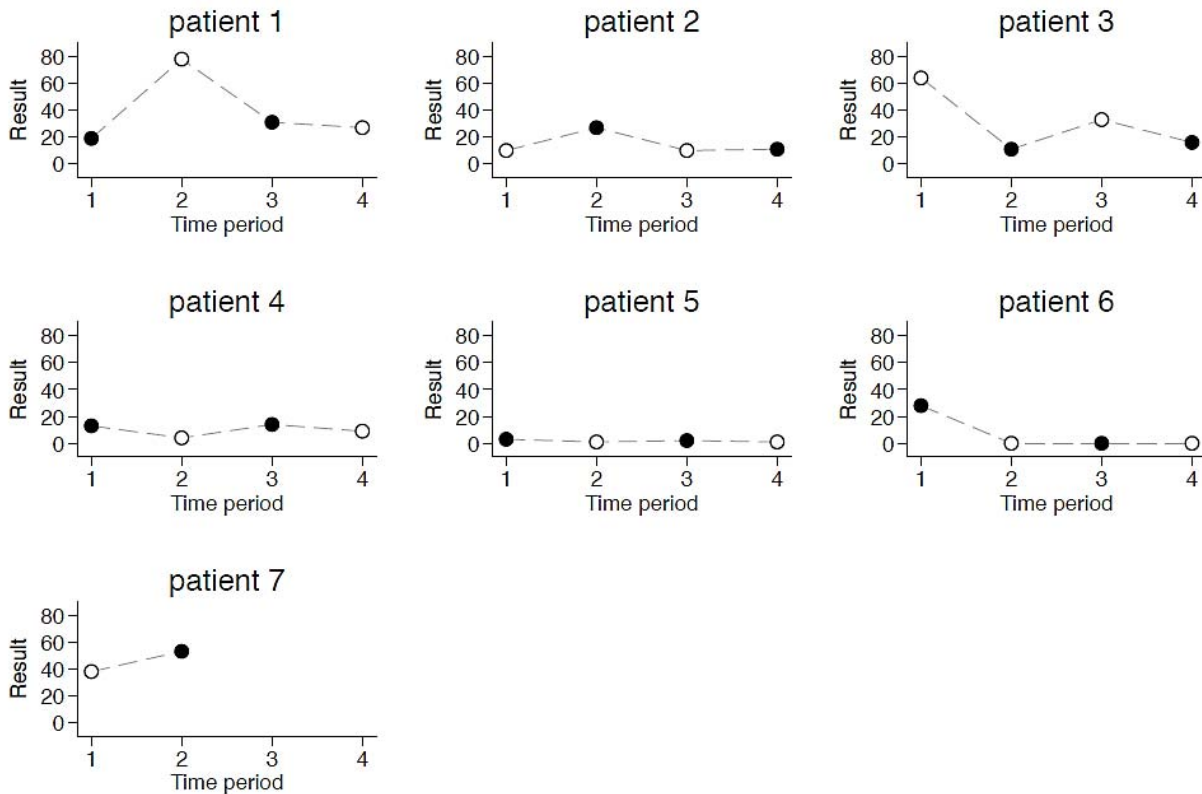

Appendix Figure 20 Legend: Data from this figure was extracted from the study published by Lashner et al in 1990, which investigates the effect of nicotine gum and placebo on abdominal pain in nonsmokers with ulcerative colitis. The average treatment effect is -3.62 (-15.84 to 8.61). White circles indicate placebo gum; black circles indicate nicotine gum.

Appendix Figure 21: Nonsmokers with ulcerative colitis treated with nicotine gum and placebo and its effect on bowel movements per day<sup>17</sup>

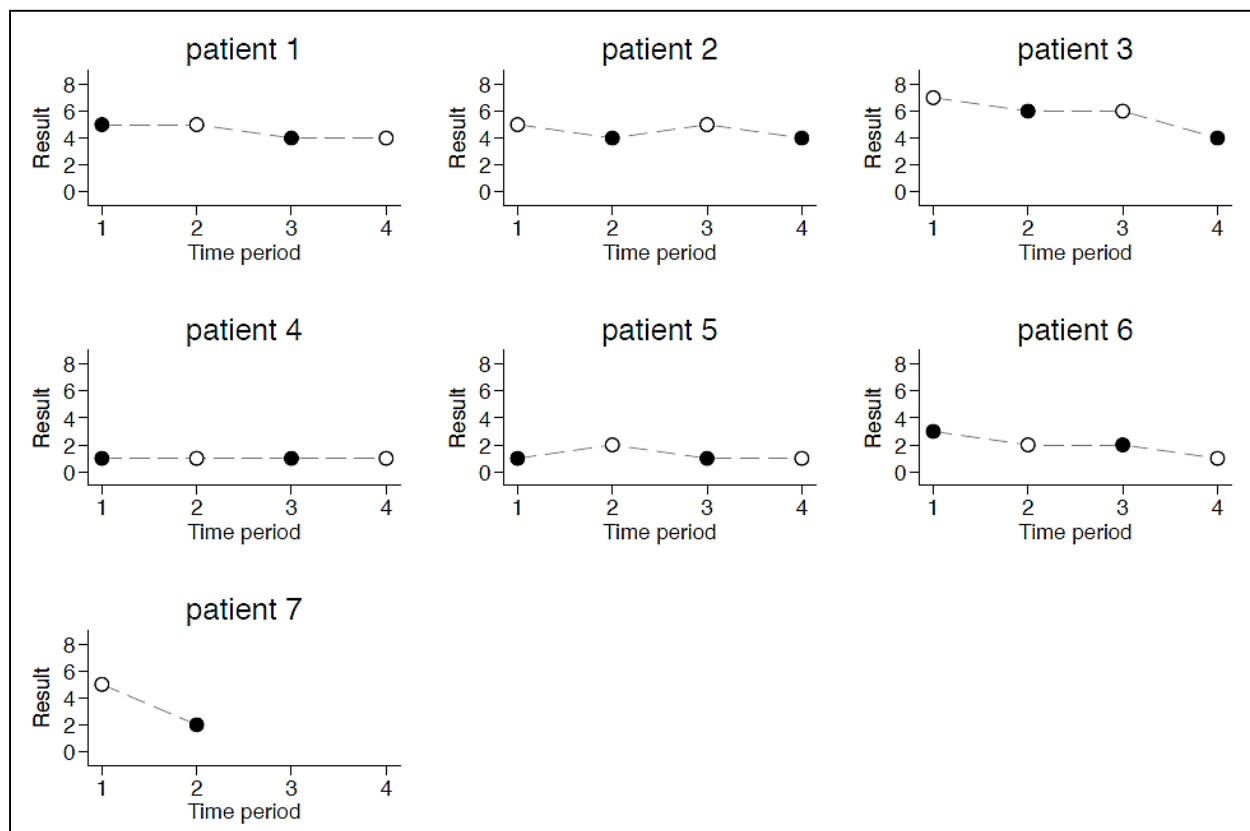

Appendix Figure 21 Legend: Data from this figure was extracted from the study published by Lashner et al in 1990, which investigates the effect of nicotine gum and placebo on bowel movements per day in nonsmokers with ulcerative colitis. The average treatment effect is -0.56 (-1.22 to 0.09). White circles indicate placebo gum; black circles indicate nicotine gum.

Appendix Figure 22: Nonsmokers with ulcerative colitis treated with nicotine gum and placebo and its effect on consistency of bowel movements<sup>17</sup>

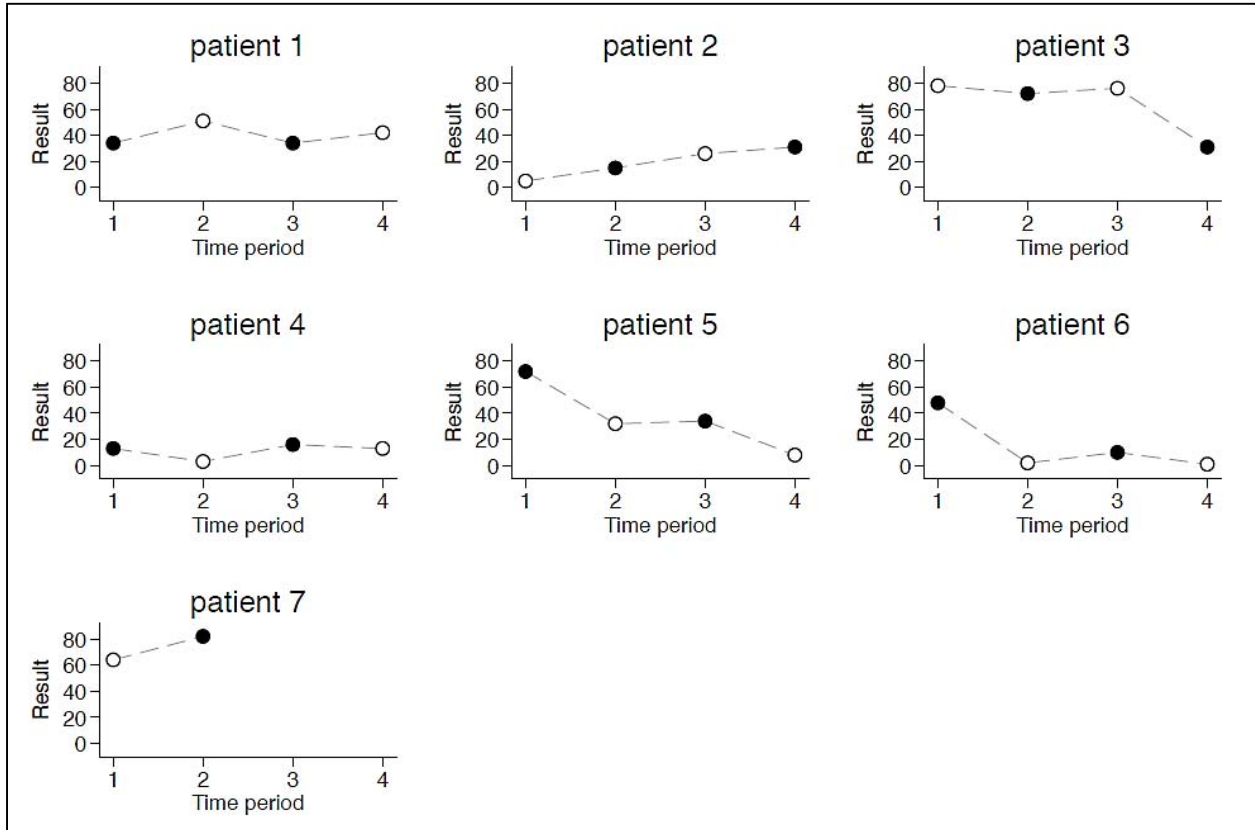

**Appendix Figure 22 Legend:** Data from this figure was extracted from the study published by Lashner et al in 1990, which investigates the effect of nicotine gum and placebo on consistency of bowel movements in nonsmokers with ulcerative colitis. The average treatment effect is 7.00 (-6.29 to 20.29). White circles indicate placebo gum; black circles indicate nicotine gum.



Appendix Figure 23: Nonsmokers with ulcerative colitis treated with nicotine gum and placebo and its effect on general sense of well-being<sup>17</sup>

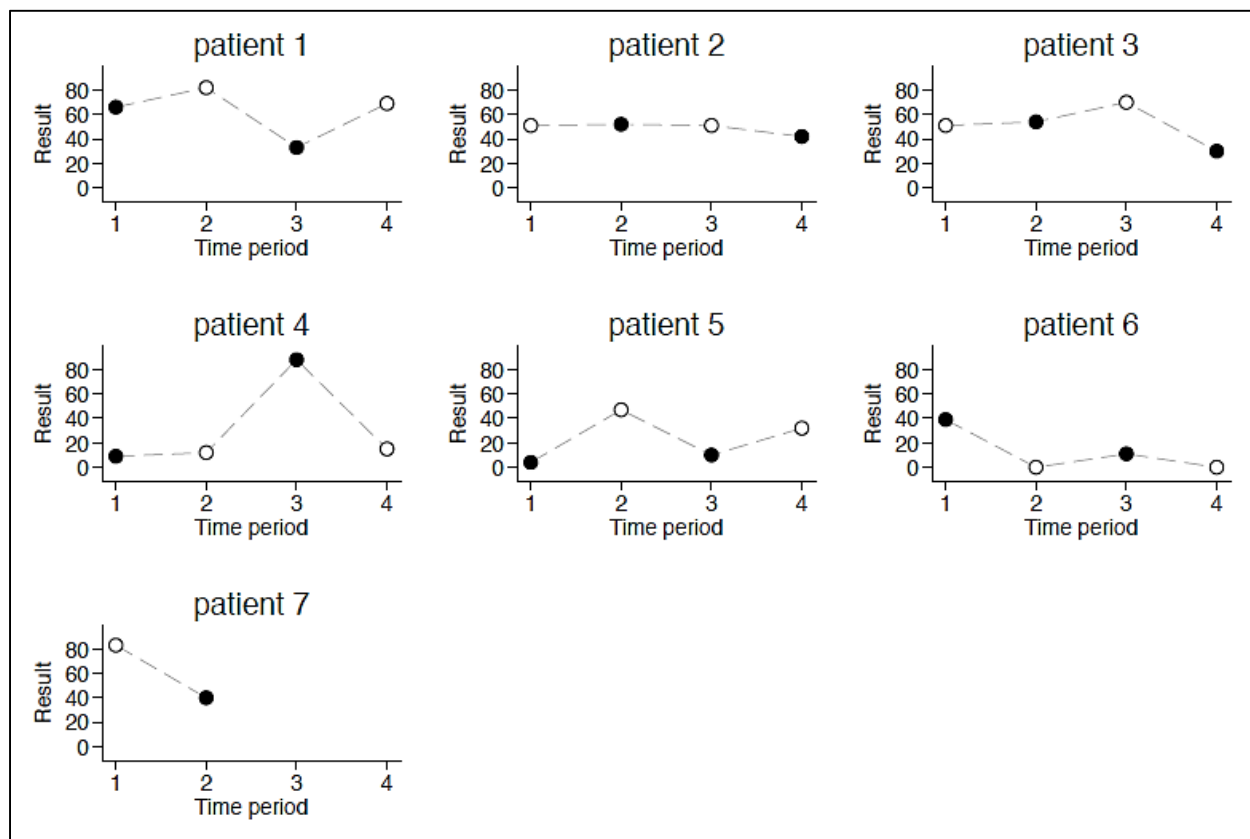

Appendix Figure 23 Legend: Data from this figure was extracted from the study published by Lashner et al in 1990, which investigates the effect of nicotine gum and placebo on general sense of well-being in nonsmokers with ulcerative colitis. The average treatment effect is -6.54 (-23.62 to 10.56). White circles indicate placebo gum; black circles indicate nicotine gum.

Appendix Figure 24: Nonsmokers with ulcerative colitis treated with nicotine gum and placebo and its effect on hematochezia<sup>17</sup>

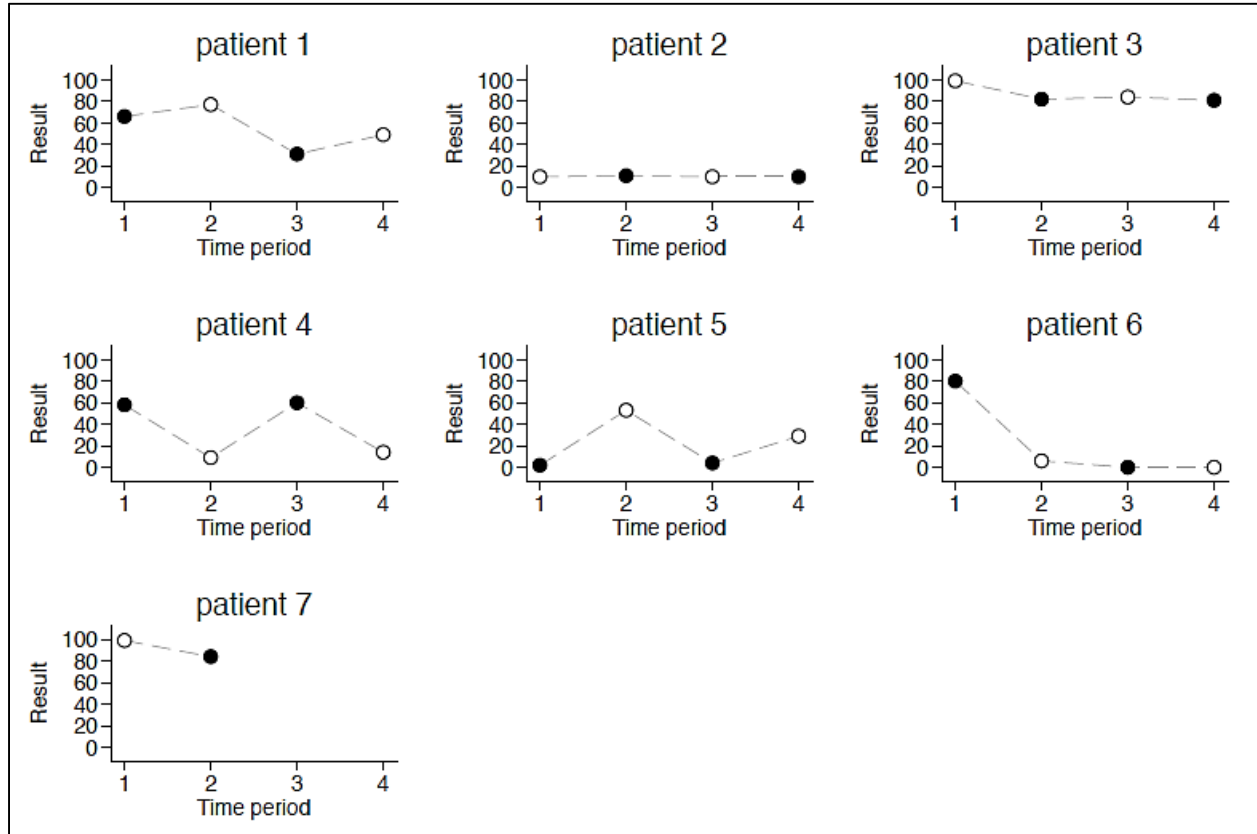

Appendix Figure 24 Legend: Data from this figure was extracted from the study published by Lashner et al in 1990, which investigates the effect of nicotine gum and placebo on hematochezia in nonsmokers with ulcerative colitis. The average treatment effect is 2.35 (-17.21 to 21.90). White circles indicate placebo gum; black circles indicate nicotine gum.

Appendix Figure 25: Patients with chronic depression and a diagnosis of major depression or dysthymia treated with sulpiride and placebo and its effect on anxiety<sup>18</sup>

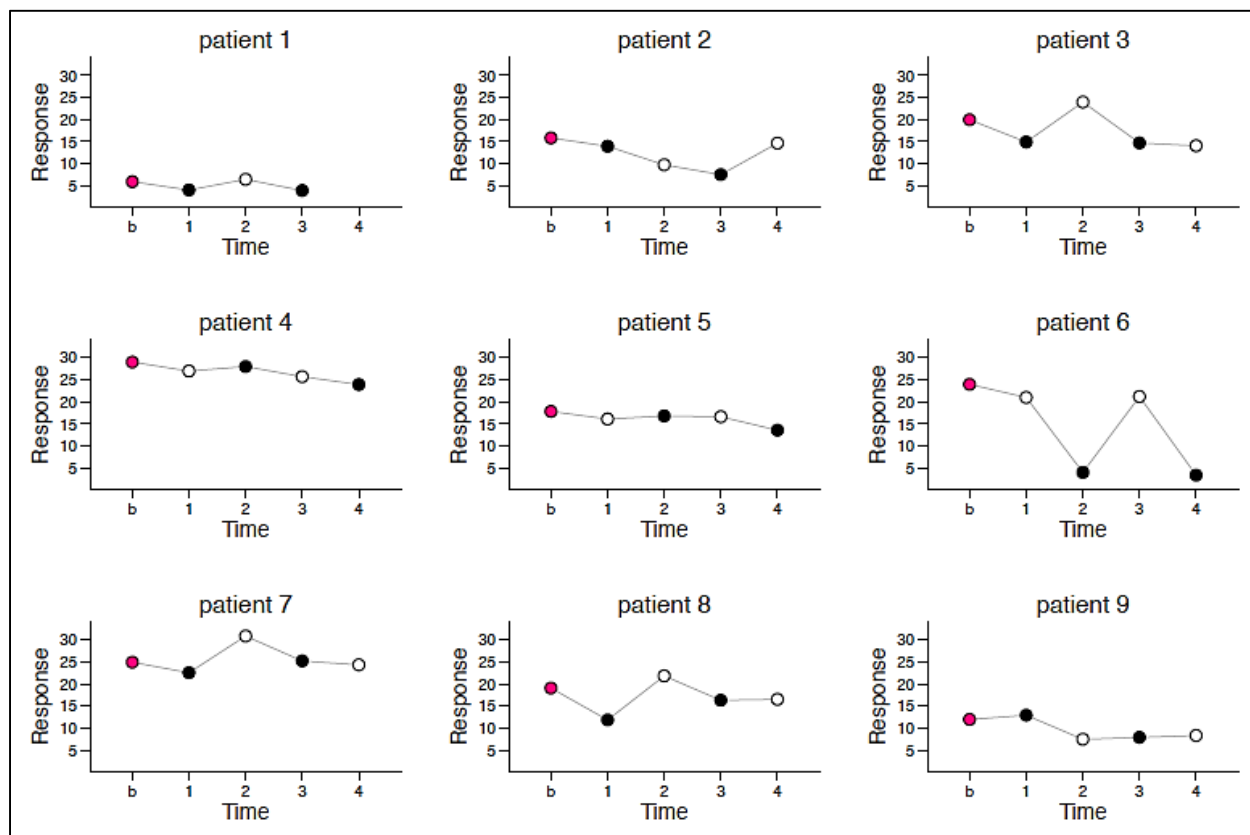

**Appendix Figure 25 Legend:** Data from this figure was extracted from the study published by Maier et al in 1994, which investigates the effect of sulpiride and placebo on anxiety in patients with chronic depression and a diagnosis of major depression or dysthymia. The average treatment effect is -3.81 (-7.22 to -0.40). Red circles indicate baseline; white circles indicate placebo; black circles indicate sulpiride.

**Appendix Figure 26: Patients with chronic depression and a diagnosis of major depression or dysthymia treated with sulpiride and placebo and its effect on depressed mood<sup>18</sup>**

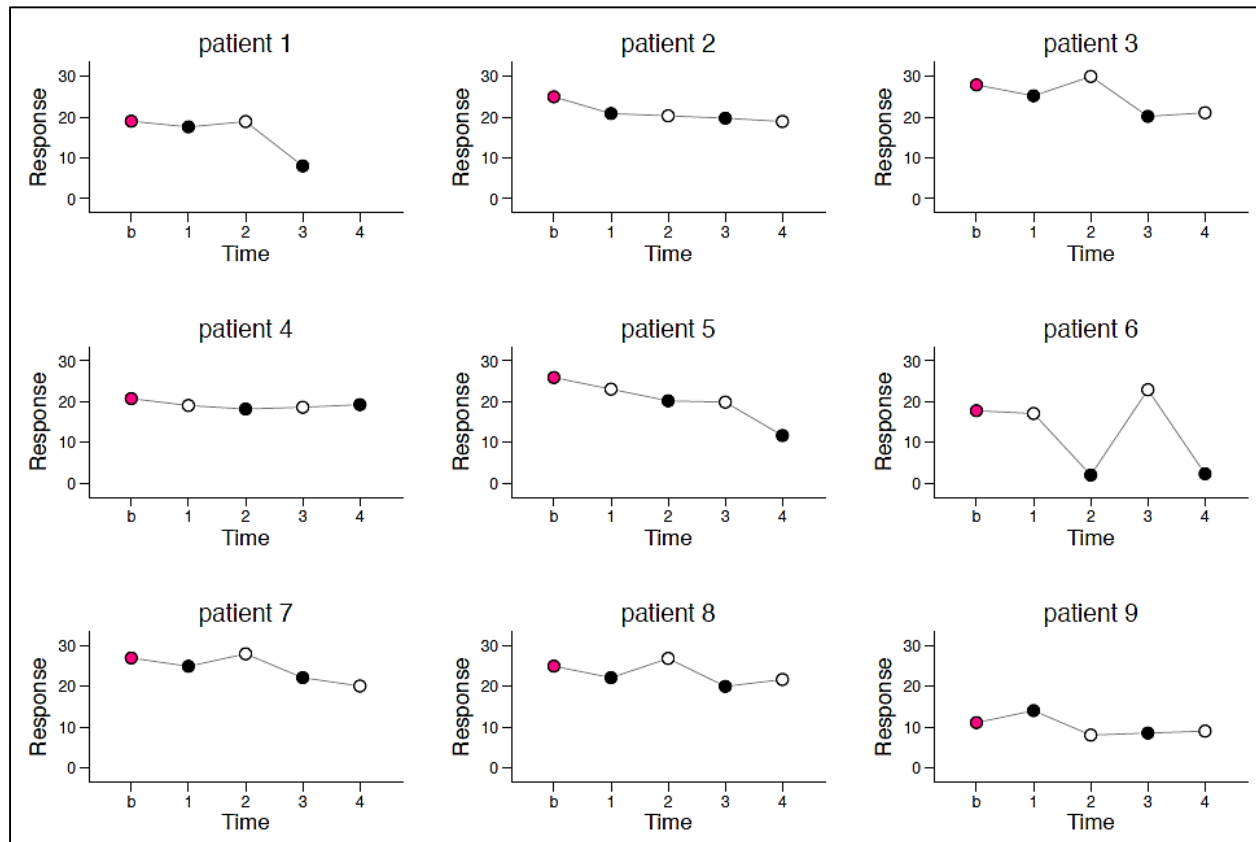

**Appendix Figure 26 Legend:** Data from this figure was extracted from the study published by Maier et al in 1994, which investigates the effect of sulpiride and placebo on depressed mood in patients with chronic depression and a diagnosis of major depression or dysthymia. The average treatment effect is -3.63 (-7.40 to 0.15). Red circles indicate baseline; white circles indicate placebo; black circles indicate sulpiride.

**Appendix Figure 27: Patients with chronic depression and a diagnosis of major depression or dysthymia treated with sulpiride and placebo and its effect on somatization<sup>18</sup>**

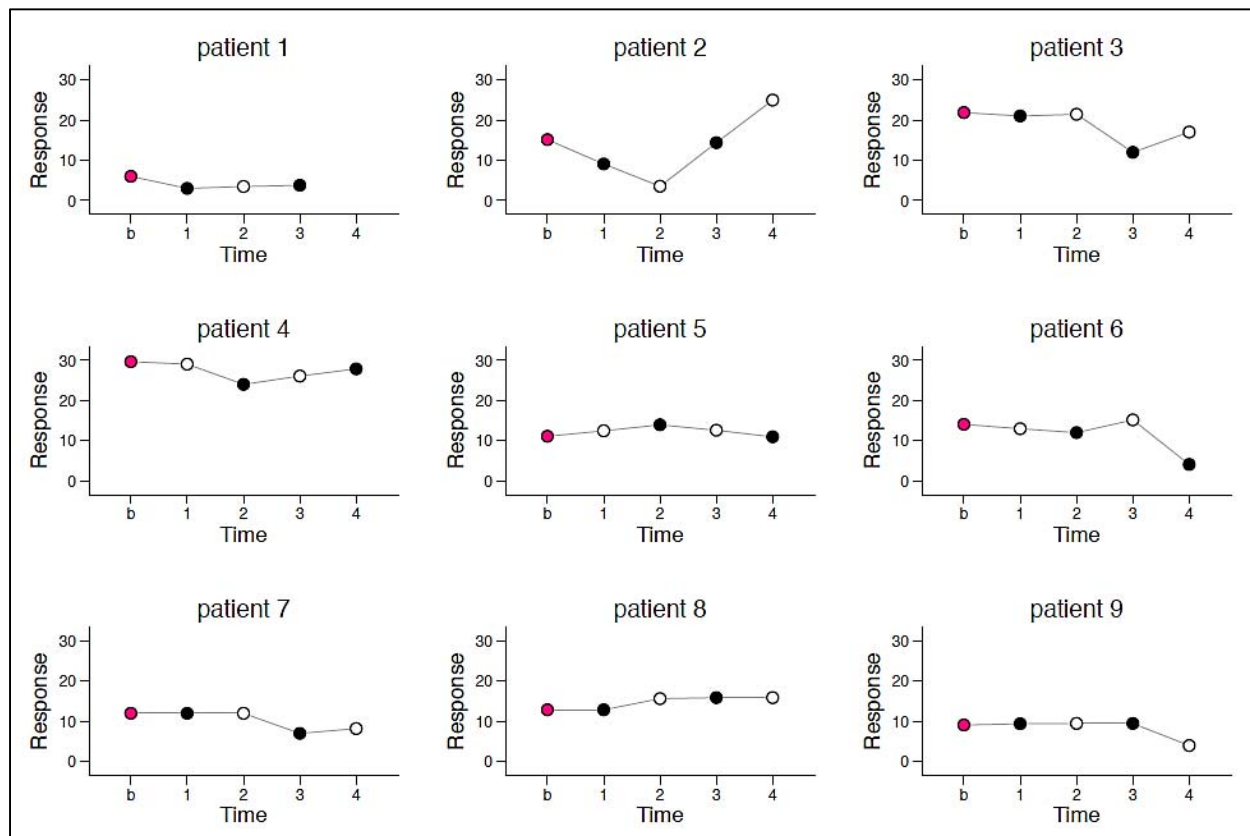

**Appendix Figure 27 Legend:** Data from this figure was extracted from the study published by Maier et al in 1994, which investigates the effect of sulpiride and placebo on somatization in patients with chronic depression and a diagnosis of major depression or dysthymia. The average treatment effect is -1.50 (-4.20 to 1.21). Red circles indicate baseline; white circles indicate placebo; black circles indicate sulpiride.

**Appendix Figure 28: Patients with ataxia from traumatic brain injury treated with ondansetron and placebo and its effect on lower extremity ataxia<sup>19</sup>**

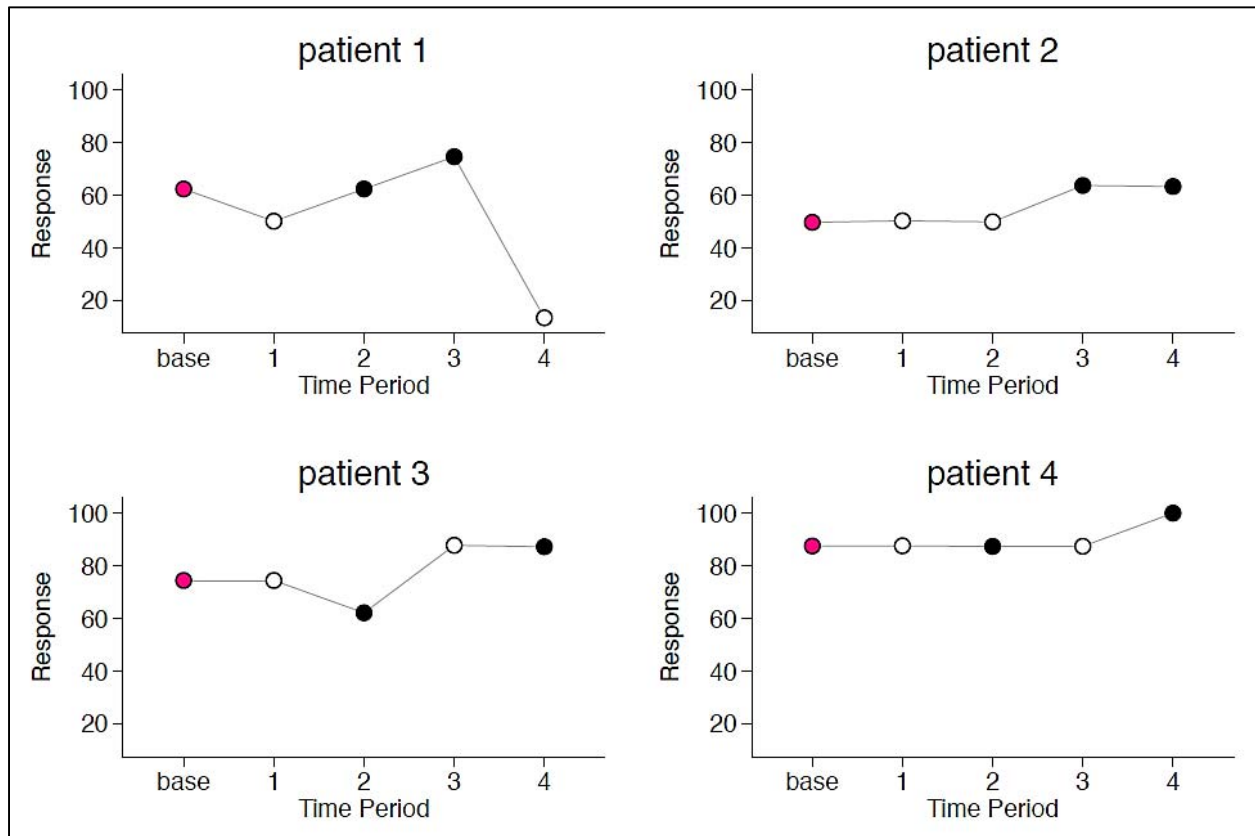

**Appendix Figure 28 Legend:** Data from this figure was extracted from the study published by Mandelcorn et al in 2004, which investigates the effect of ondansetron and placebo on lower extremity ataxia in patients with ataxia from traumatic brain injury. Each patient received the same treatment. The average treatment effect is 12.49 (-0.85 to 25.84). Red circles indicate baseline; white circles indicate placebo; black circles indicate ondansetron.

**Appendix Figure 29: Patients with ataxia from traumatic brain injury treated with ondansetron and placebo and its effect on self-assessment score<sup>19</sup>**

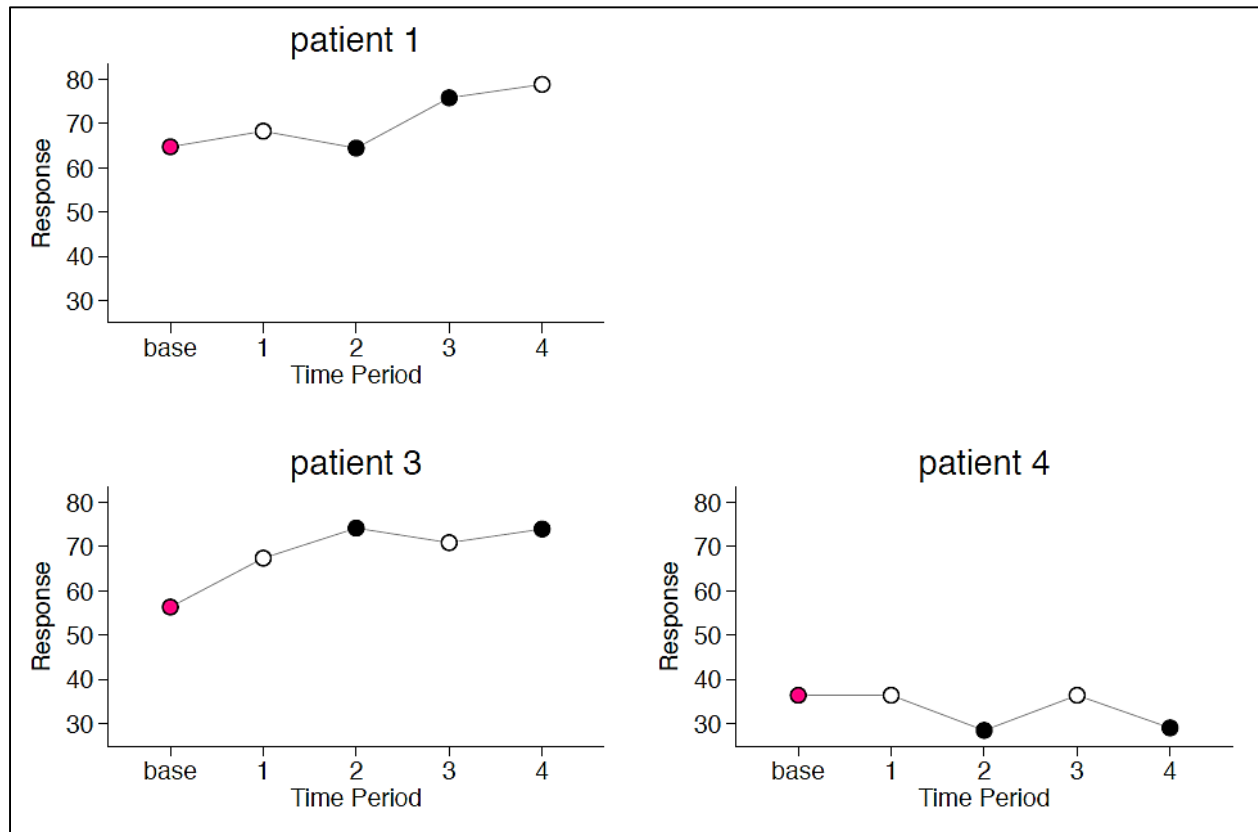

**Appendix Figure 29 Legend:** Data from this figure was extracted from the study published by Mandelcorn et al in 2004, which investigates the effect of ondansetron and placebo on self-assessment score in patients with ataxia from traumatic brain injury. The average treatment effect is -2.05 (-8.43 to 4.33). Red circles indicate baseline; white circles indicate placebo; black circles indicate ondansetron.

**Appendix Figure 30: Patients with ataxia from traumatic brain injury treated with ondansetron and placebo and its effect on truncal ataxia<sup>19</sup>**

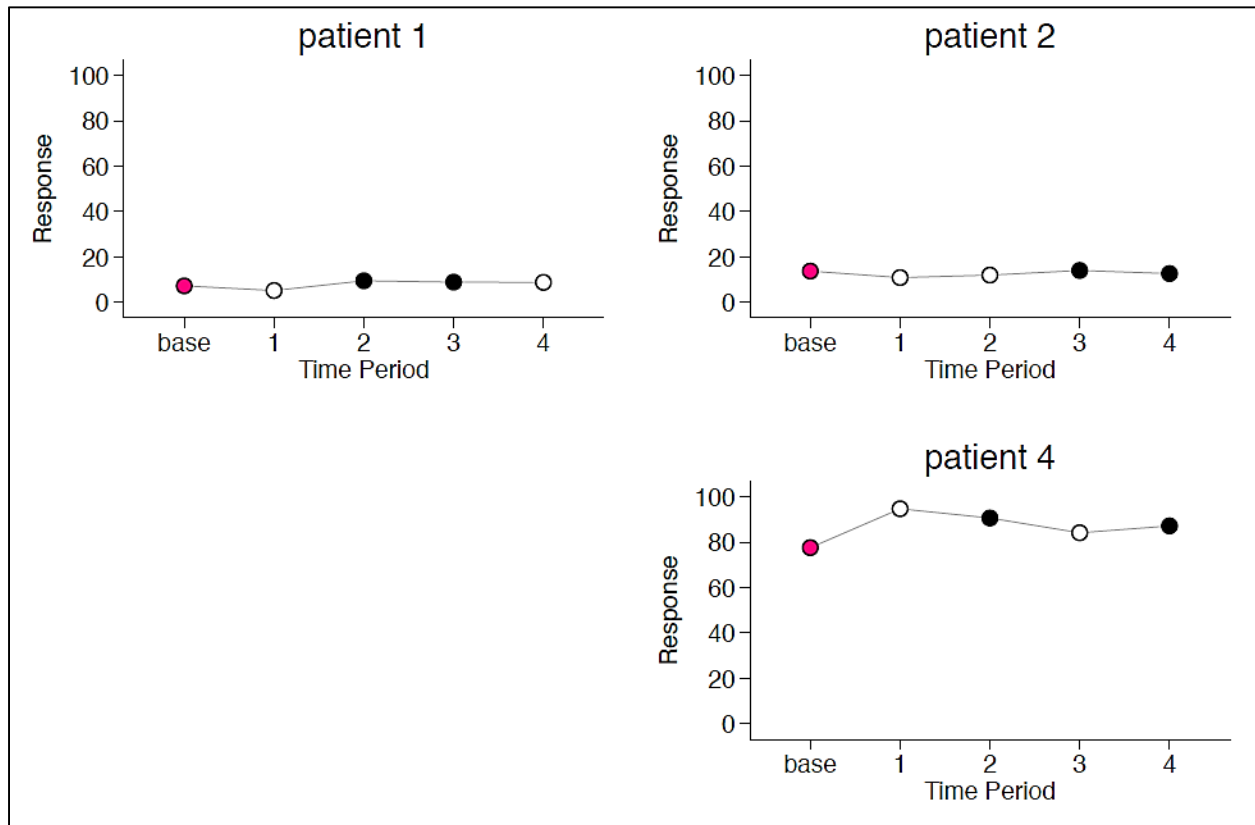

**Appendix Figure 30 Legend:** Data from this figure was extracted from the study published by Mandelcorn et al in 2004, which investigates the effect of ondansetron and placebo on truncal ataxia in patients with ataxia from traumatic brain injury. The average treatment effect is 1.20 (-2.06 to 4.45). Red circles indicate baseline; white circles indicate placebo; black circles indicate ondansetron.



**Appendix Figure 31: Patients with ataxia from traumatic brain injury treated with ondansetron and placebo and its effect on upper extremity ataxia<sup>19</sup>**

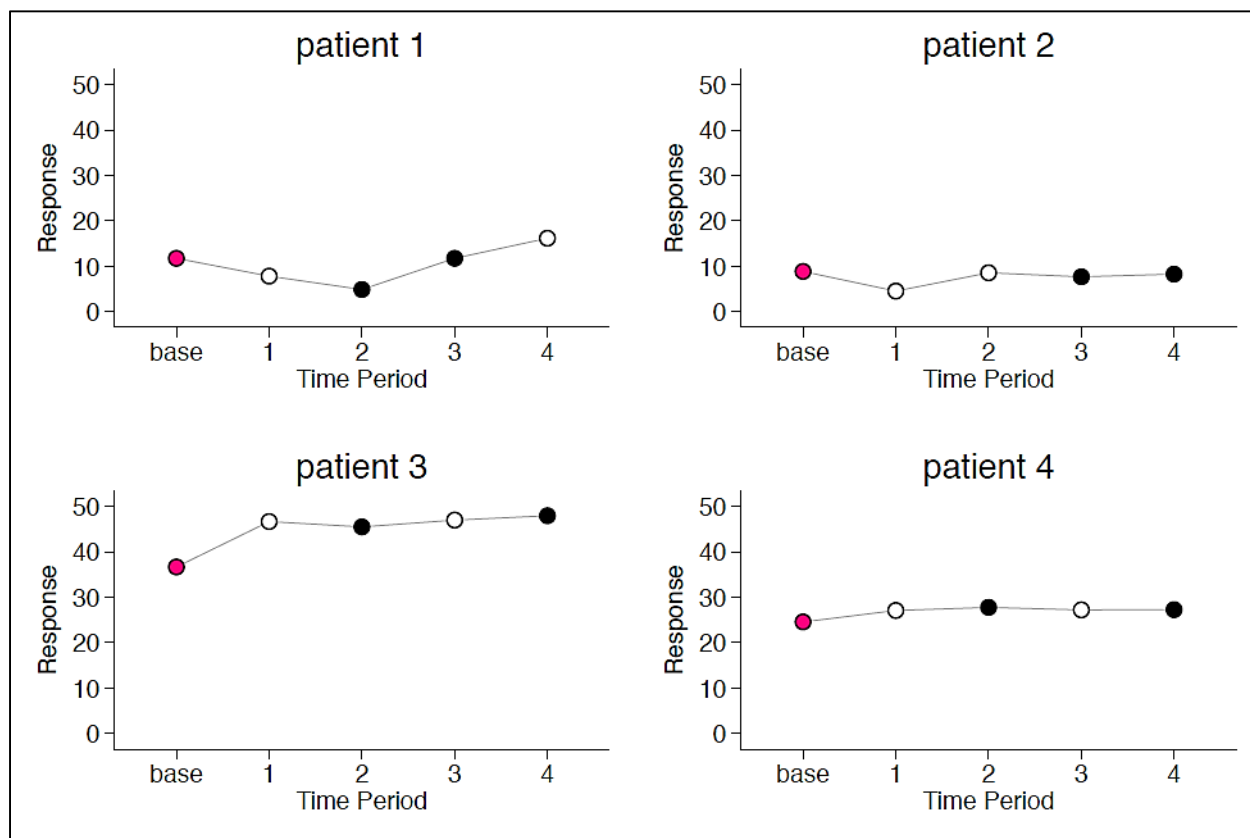

**Appendix Figure 31 Legend:** Data from this figure was extracted from the study published by Mandelcorn et al in 2004, which investigates the effect of ondansetron and placebo on upper extremity ataxia in patients with ataxia from traumatic brain injury. The average treatment effect is -0.50 (-3.10 to 2.10). Red circles indicate baseline; white circles indicate placebo; black circles indicate ondansetron.

**Appendix Figure 32: Patients with chronic neuropathic pain treated with oral dextromethorphan and placebo and its effect on VAS pain intensity<sup>20</sup>**

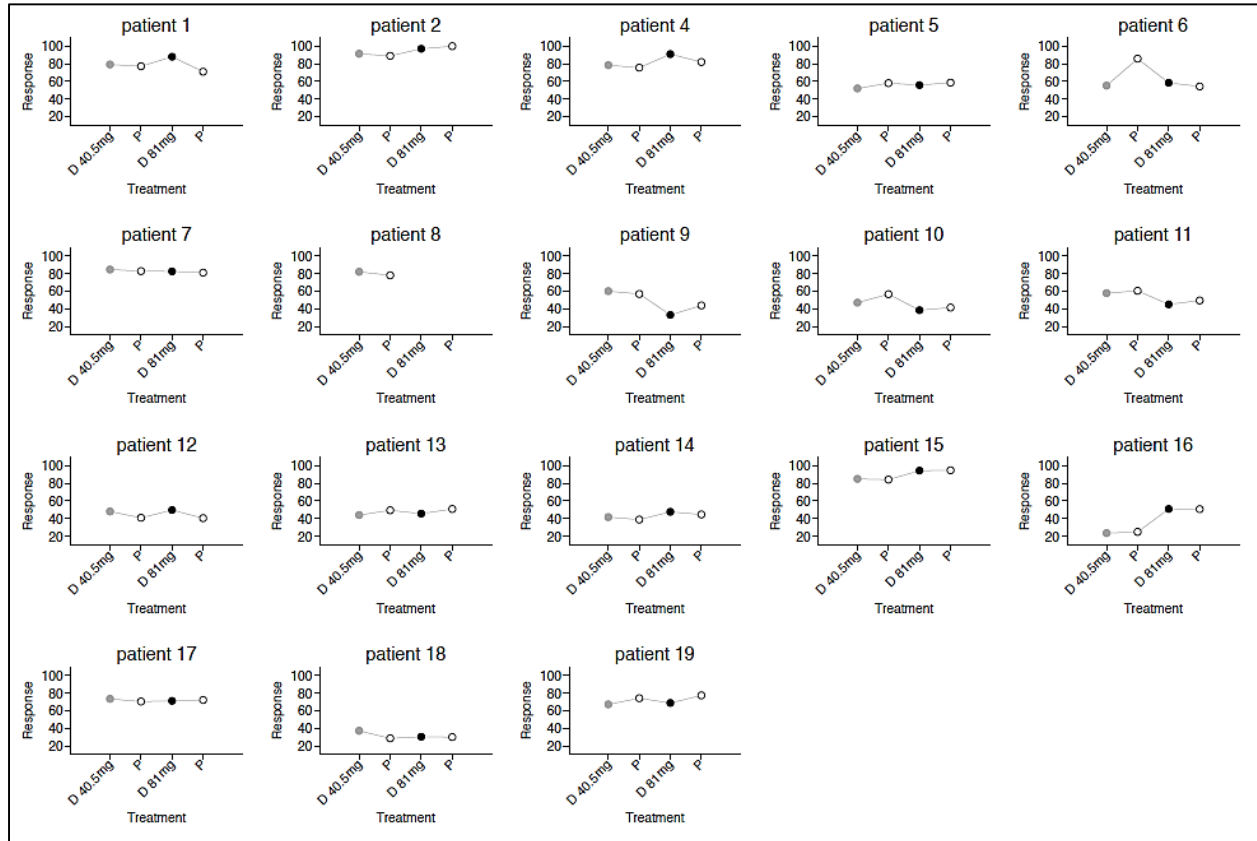

**Appendix Figure 32 Legend:** Data from this figure was extracted from the study published by McQuay et al in 1994, which investigates the effect of oral dextromethorphan and placebo on VAS pain intensity in patients with chronic neuropathic pain. The average treatment effect is -1.06 (-5.16 to 3.04). Grey circles indicate dextromethorphan 40.5 mg daily; black circles indicate dextromethorphan 81 mg daily; white circles indicate placebo.

### Appendix Figure 33: Patients with chronic neuropathic pain treated with oral dextromethorphan and placebo and its effect on VAS relief intensity<sup>20</sup>

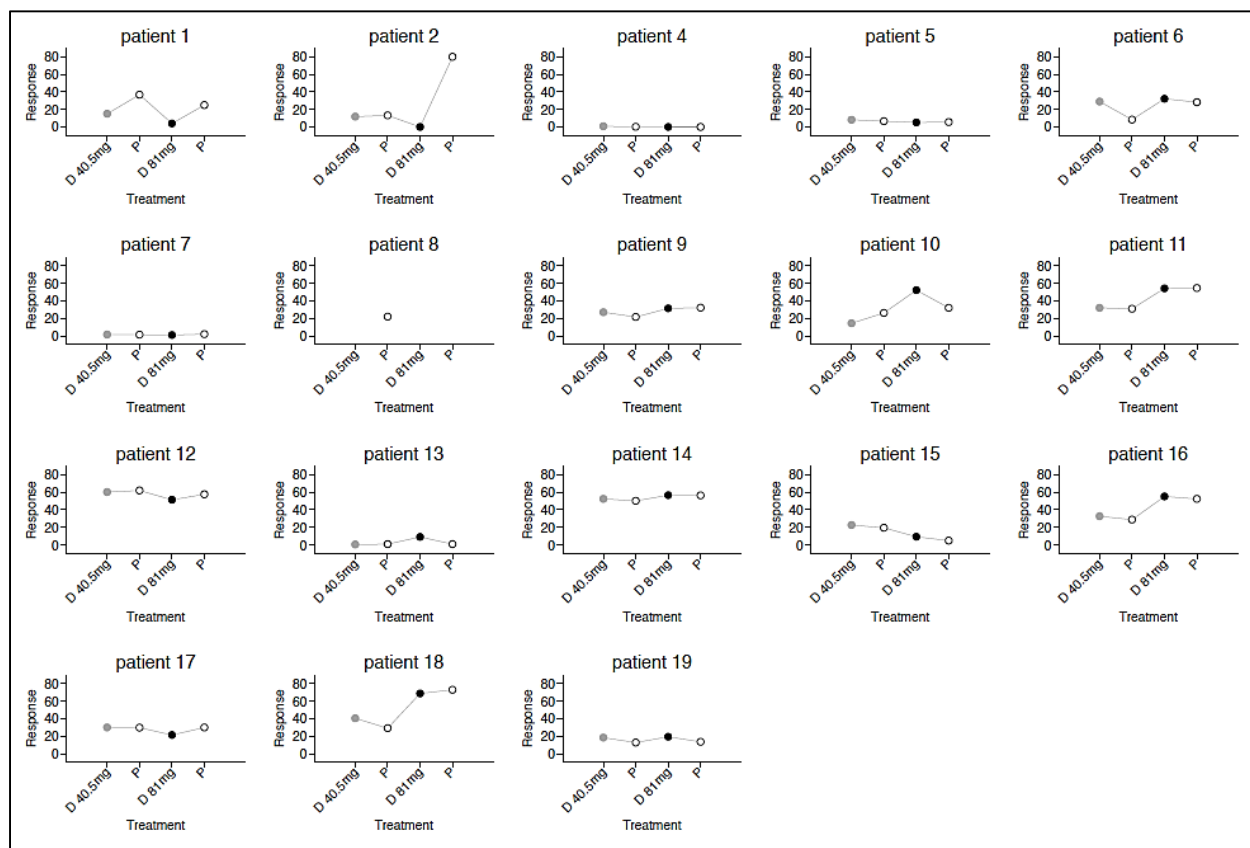

**Appendix Figure 33 Legend:** Data from this figure was extracted from the study published by McQuay et al in 1994, which investigates the effect of oral dextromethorphan and placebo on VAS relief intensity in patients with chronic neuropathic pain. The average treatment effect is -3.86 (-11.11 to 3.40). Grey circles indicate dextromethorphan 40.5 mg daily; black circles indicate dextromethorphan 81 mg daily; white circles indicate placebo.

**Appendix Figure 34: Patients with unstable angina at rest treated with continuous and intermittent injection of isosorbide dinitrate and its effect on incidence of angina<sup>21</sup>**

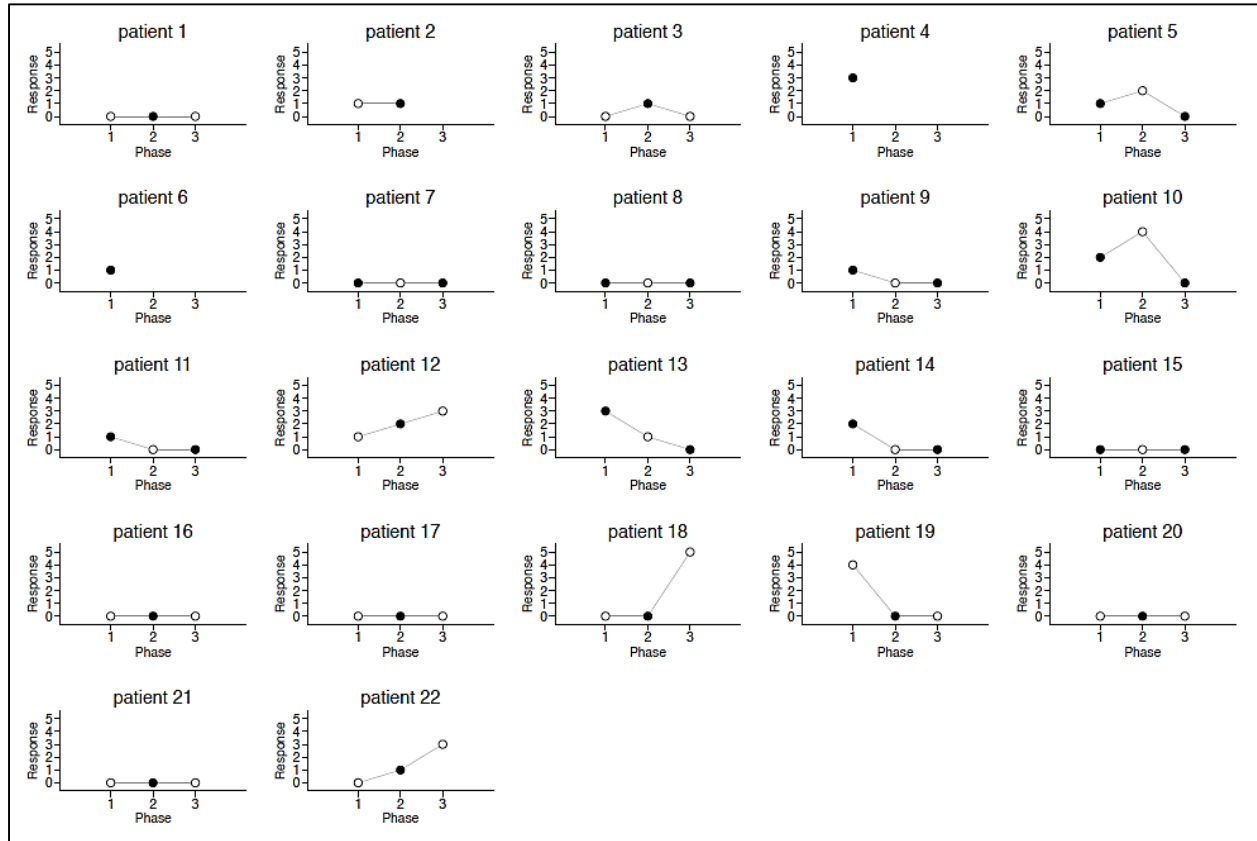

**Appendix Figure 34 Legend:** Data from this figure was extracted from the study published by Miyazaki et al in 1995, which investigates the effect of continuous and intermittent injection of isosorbide dinitrate on incidence of angina in patients with unstable angina. The average treatment effect is 0.47 (-0.32 to 1.26). White circles indicate continuous injection; black circles indicate intermittent injection.

**Appendix Figure 35: Children with brain tumors receiving highly emetogenic therapy treated with ondansetron/metopimazine and ondansetron monotherapy and its effect on emetic episodes per day<sup>22</sup>**

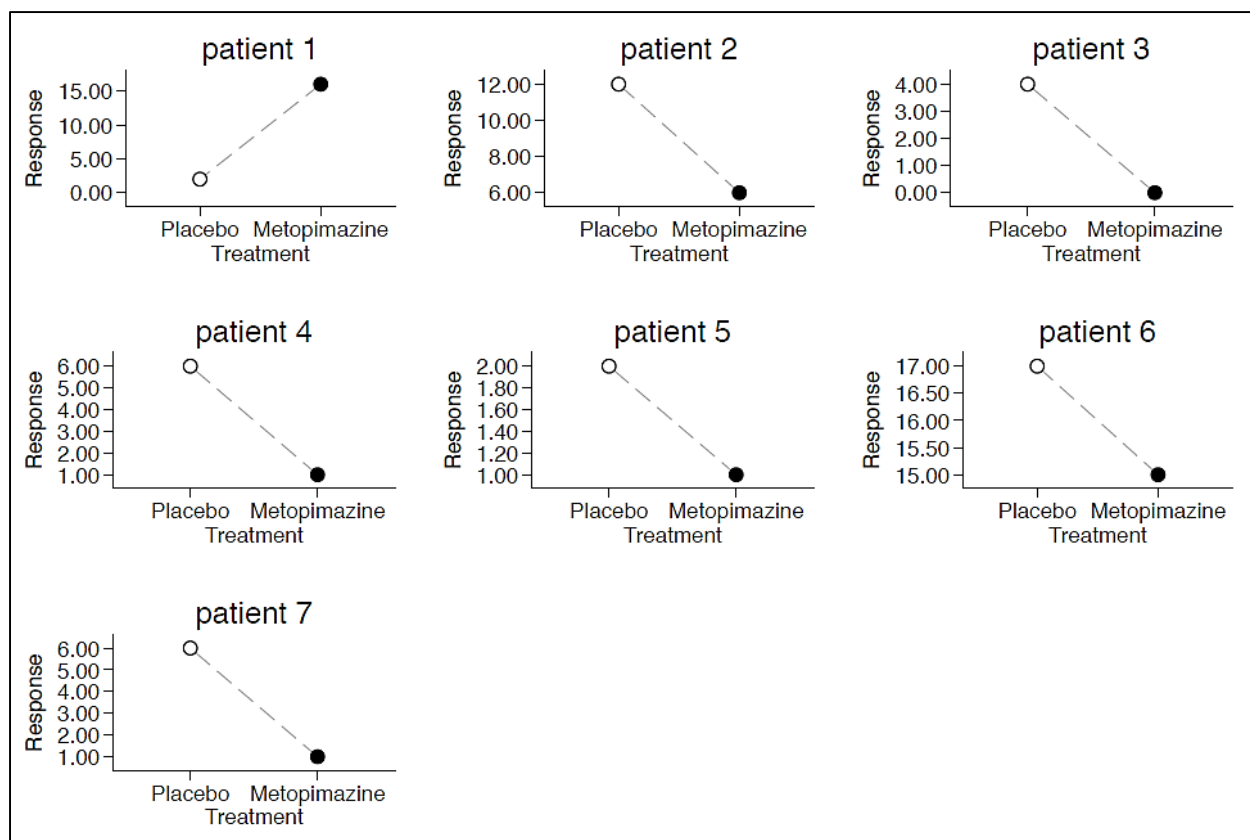

**Appendix Figure 35 Legend:** Data from this figure was extracted from the study published by Nathan et al in 2006, which investigates the effect of ondansetron/metopimazine and ondansetron monotherapy on emetic episodes per day in children with brain tumors receiving highly emetogenic therapy. The average treatment effect is -0.56 (-1.74 to 0.62). White circles indicate placebo; black circles indicate metopimazine.

**Appendix Figure 36: Patients with unstable angina at rest treated with oral verapamil and placebo and its effect on ischemic attacks<sup>23</sup>**

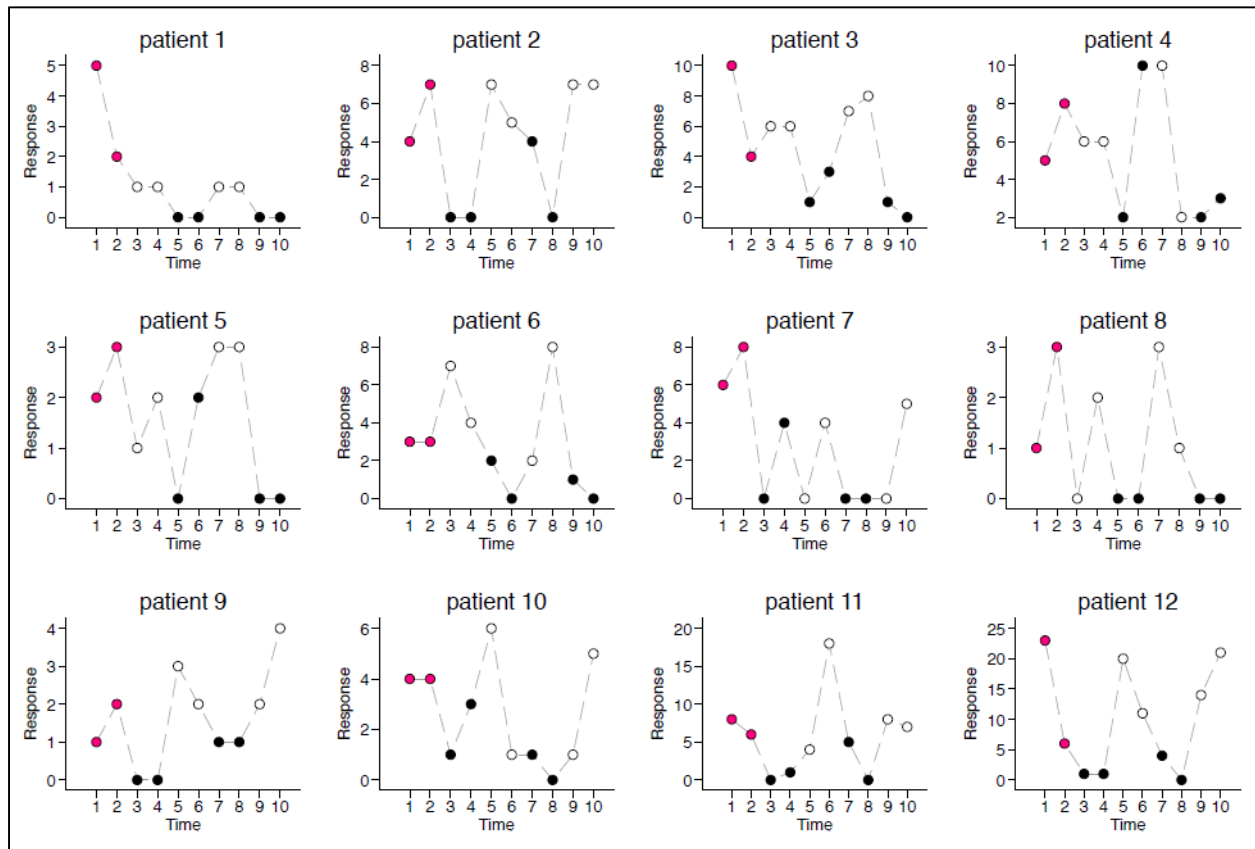

**Appendix Figure 36 Legend:** Data from this figure was extracted from the study published by Parodi et al in 1979, which investigates the effect of oral verapamil and placebo on ischemic attacks in patients with unstable angina. The average treatment effect is -1.63 (-2.10 to -1.17). Red circles indicate baseline; white circles indicate placebo; black circles indicate verapamil.

**Appendix Figure 37: Patients with unstable angina at rest treated with verapamil, propranolol and placebo and its effect on asymptomatic ST depression<sup>24</sup>**

## Asymptomatic ST Depression

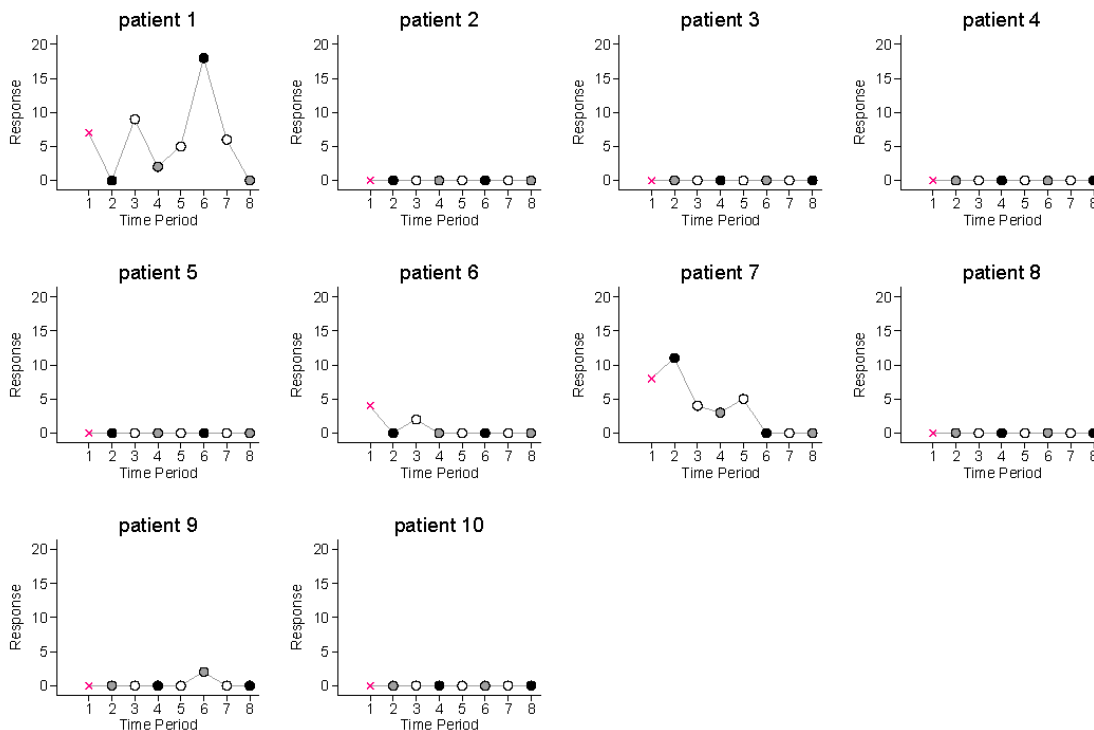

**Appendix Figure 37 Legend:** Data from this figure was extracted from the study published by Parodi et al in 1986, which investigates the effect of verapamil, propranolol and placebo on asymptomatic ST depression in patients with unstable angina. The average treatment effect is -0.82 (-2.54 to 0.90). Red Xs indicate baseline; white circles indicate placebo; grey circles indicate propranolol; black circles indicate verapamil.

**Appendix Figure 38: Patients with unstable angina at rest treated with verapamil, propranolol and placebo and its effect on asymptomatic ST elevation<sup>24</sup>**

### Asymptomatic ST Elevation

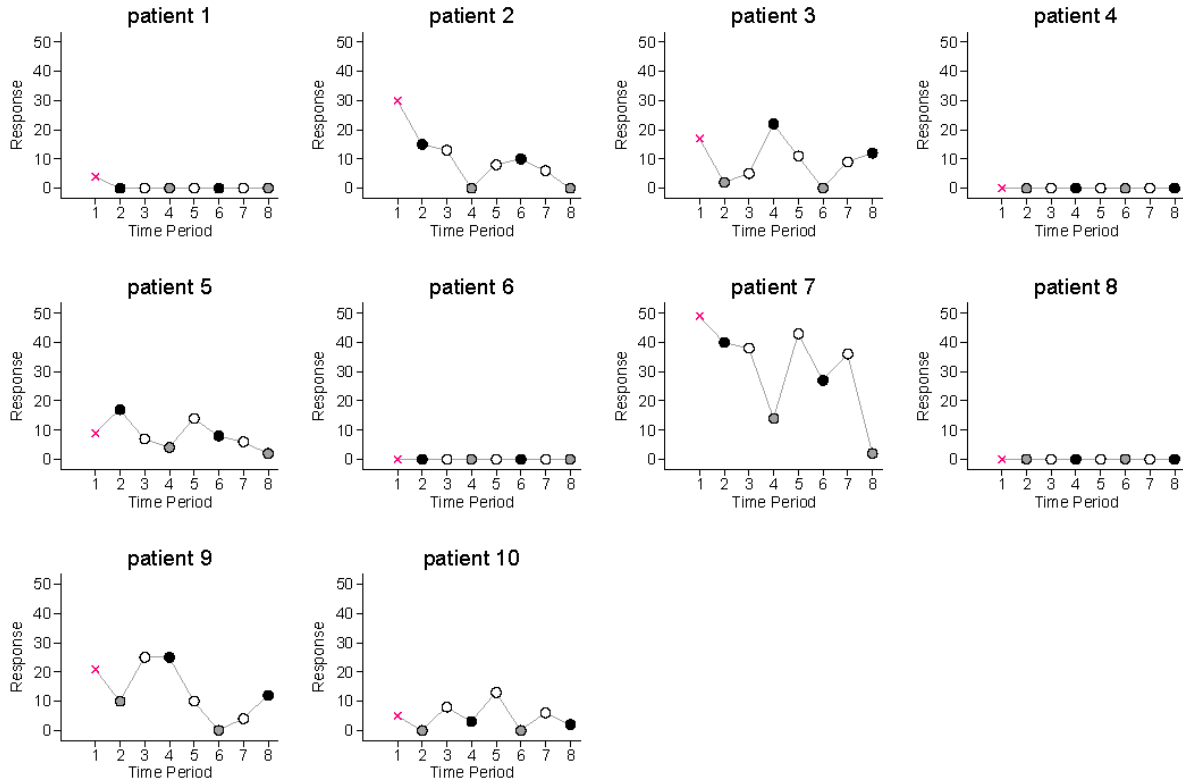

**Appendix Figure 38 Legend:** Data from this figure was extracted from the study published by Parodi et al in 1986, which investigates the effect of verapamil, propranolol and placebo on asymptomatic ST elevation in patients with unstable angina. The average treatment effect is -1.97 (-2.92 to -1.01). Red Xs indicate baseline; white circles indicate placebo; grey circles indicate propranolol; black circles indicate verapamil.



**Appendix Figure 39: Patients with unstable angina at rest treated with verapamil, propranolol and placebo and its effect on symptomatic ST depression<sup>24</sup>**

## Symptomatic ST Depression

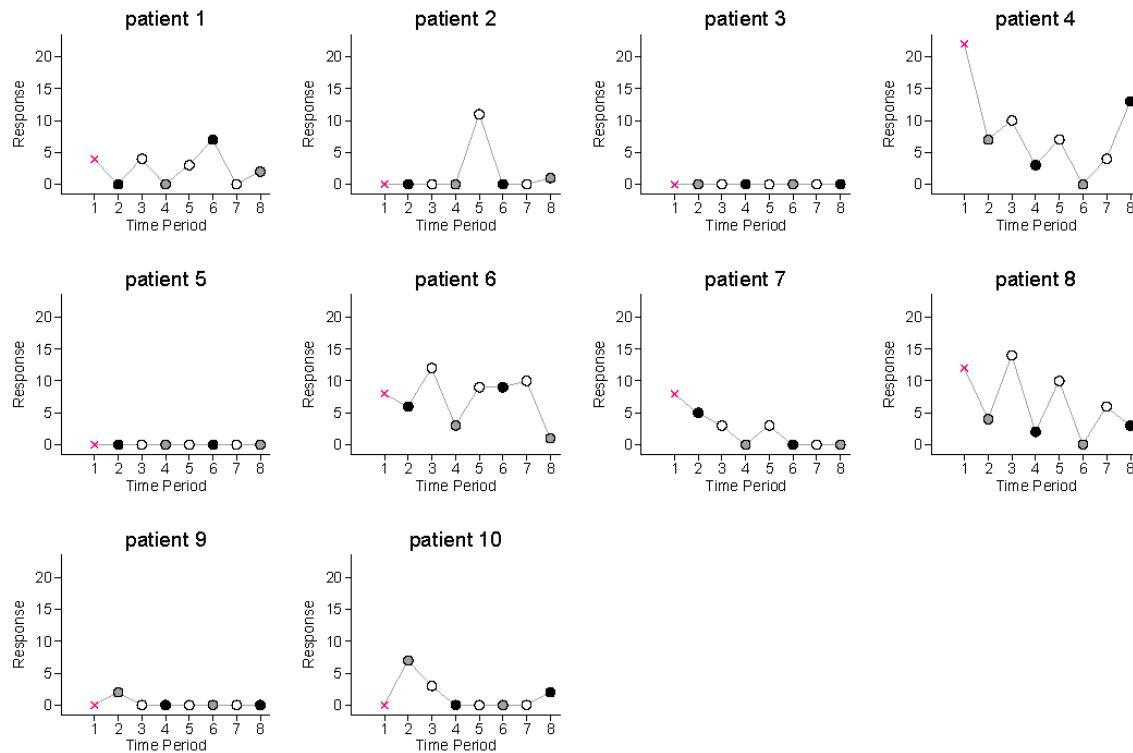

**Appendix Figure 39 Legend:** Data from this figure was extracted from the study published by Parodi et al in 1986, which investigates the effect of verapamil, propranolol and placebo on symptomatic ST depression in patients with unstable angina. The average treatment effect is -0.98 (-1.84 to -0.13). Red Xs indicate baseline; white circles indicate placebo; grey circles indicate propranolol; black circles indicate verapamil.

**Appendix Figure 40: Patients with unstable angina at rest treated with verapamil, propranolol and placebo and its effect on symptomatic ST elevation<sup>24</sup>**

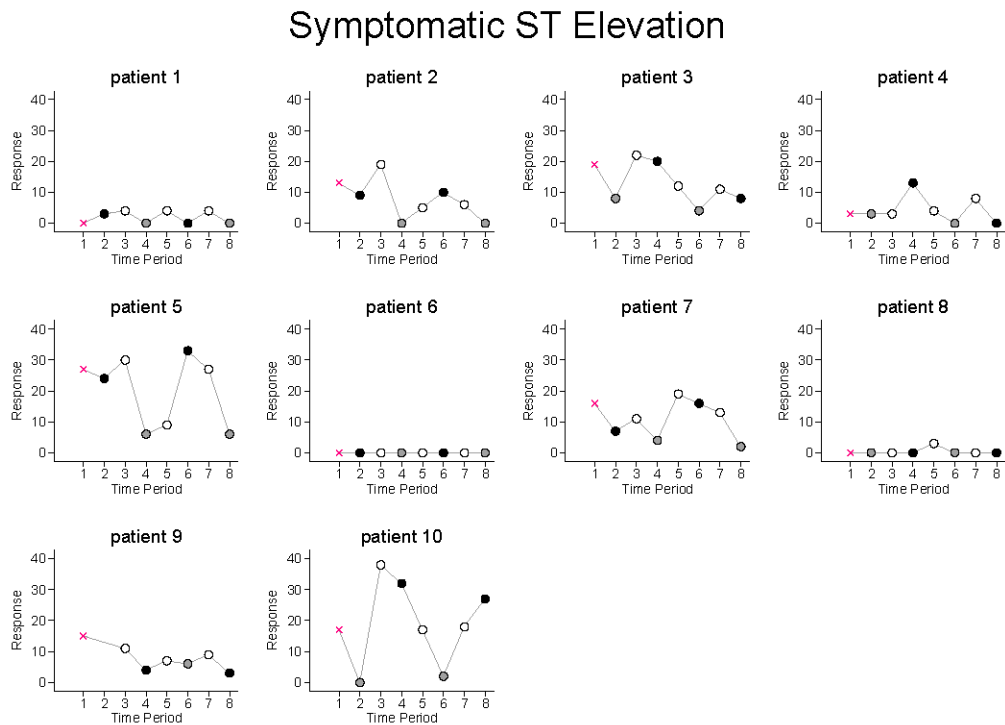

**Appendix Figure 40 Legend:** Data from this figure was extracted from the study published by Parodi et al in 1986, which investigates the effect of verapamil, propranolol and placebo on symptomatic ST elevation in patients with unstable angina. The average treatment effect is -1.87 (-2.72 to -1.02). Red Xs indicate baseline; white circles indicate placebo; grey circles indicate propranolol; black circles indicate verapamil.

**Appendix Figure 41: Patients previously taking warfarin for either atrial fibrillation or deep vein thrombosis treated with apo-warfarin and coumadin and its effect on international normalized ratio<sup>8</sup>**

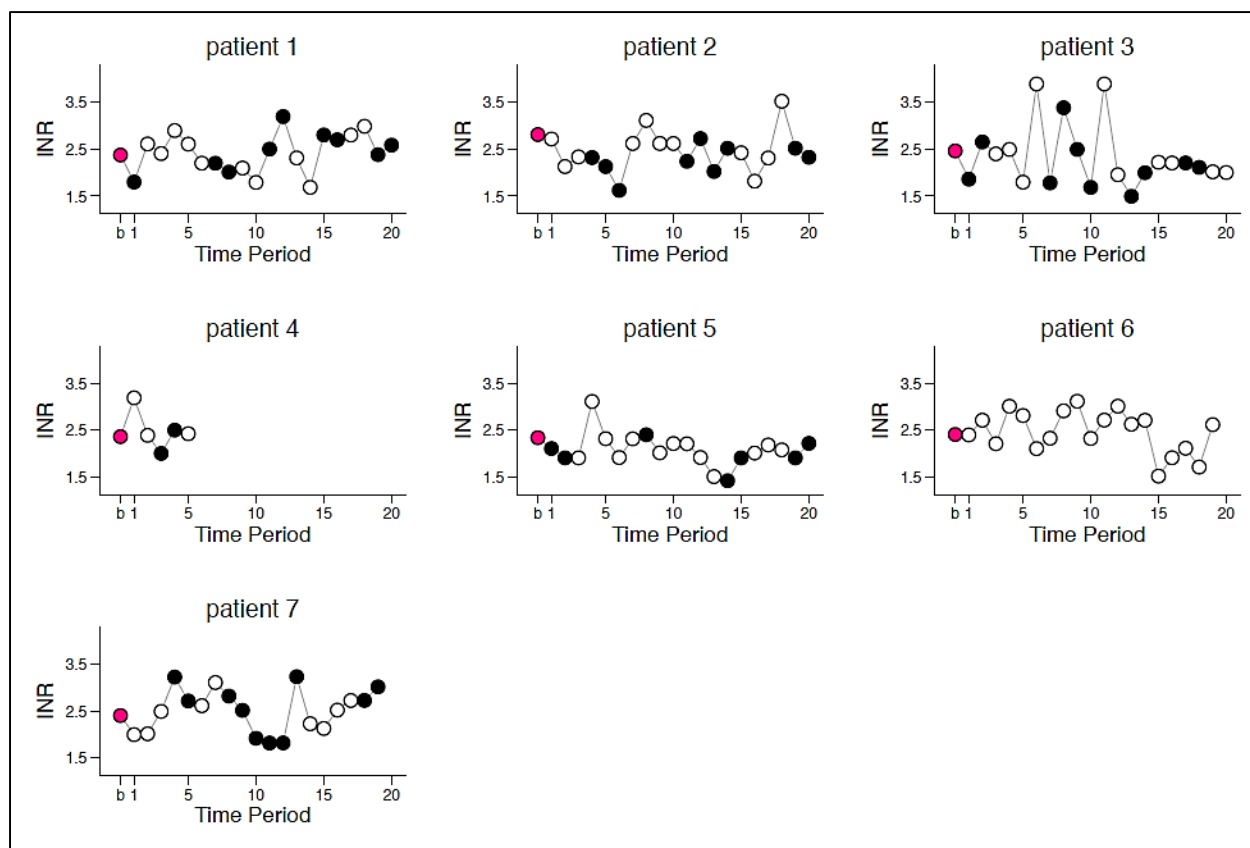

**Appendix Figure 41 Legend:** Data from this figure was extracted from the study published by Pereira et al in 1995, which investigates the effect of apo-warfarin and coumadin on international normalized ratio in patients previously taking warfarin for either atrial fibrillation or deep vein thrombosis. The average treatment effect is  $-0.12$  ( $-0.30$  to  $0.07$ ). Red circles indicate baseline; white circles indicate Coumadin; black circles indicate apo-warfarin.

**Appendix Figure 42: Parkinson’s disease patients with troublesome dyskinesia treated with simvastatin and placebo and its effect on discomfort caused by troublesome dyskinesia<sup>25</sup>**

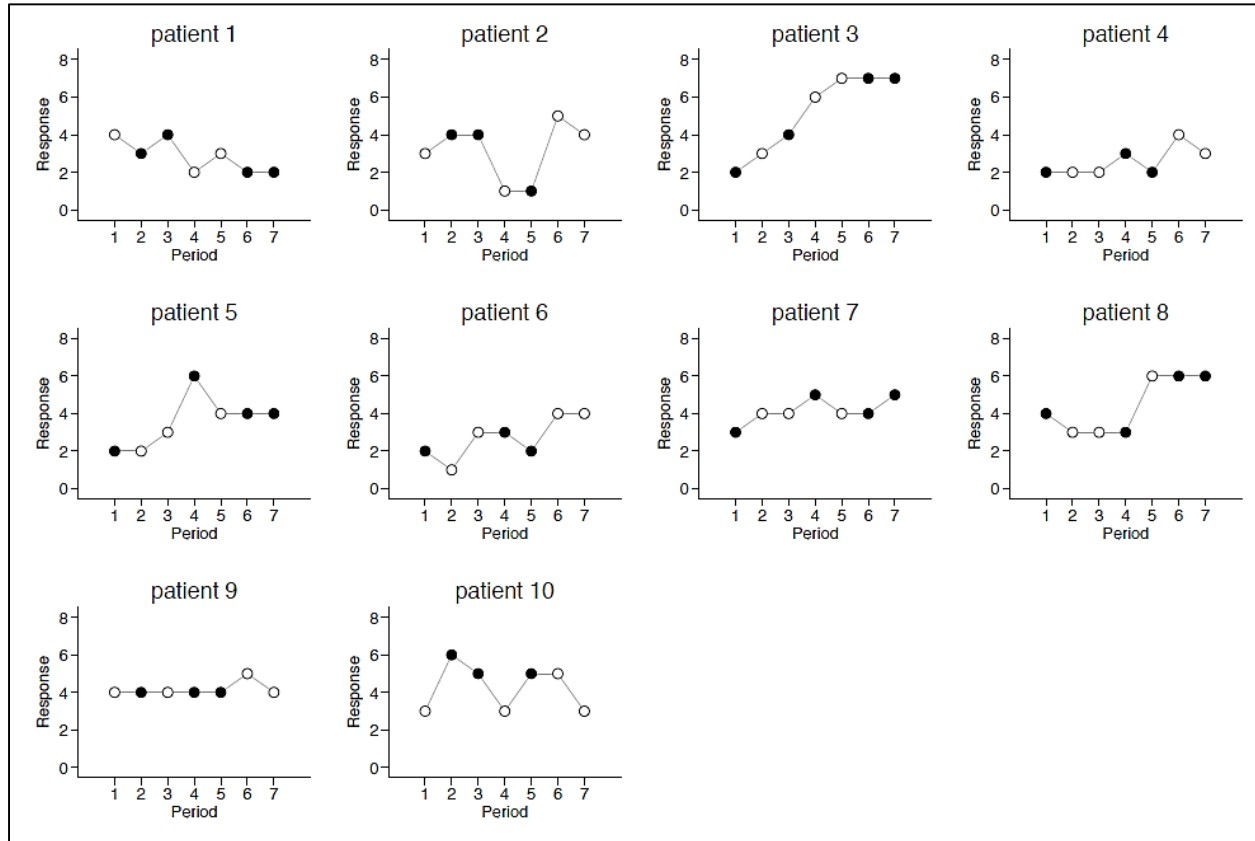

**Appendix Figure 42 Legend:** Data from this figure was extracted from the study published by Tison et al in 2012, which investigates the effect of simvastatin and placebo on discomfort caused by troublesome dyskinesia in Parkinson’s disease patients with troublesome dyskinesia. The average treatment effect is 0.20 (-0.40 to 0.80). White circles indicate placebo; black circles indicate simvastatin.

## Appendix Reference List

- (1) Emmanuel AV, Kamm MA, Roy AJ, Kerstens R, Vandeplassche L. Randomised clinical trial: the efficacy of prucalopride in patients with chronic intestinal pseudo-obstruction--a double-blind, placebo-controlled, cross-over, multiple n = 1 study. *Aliment Pharmacol Ther* 2012; 35(1):48-55.
- (2) Haas DC, Sheehe PR. Dextroamphetamine pilot crossover trials and n of 1 trials in patients with chronic tension-type and migraine headache. *Headache* 2004; 44(10):1029-1037.
- (3) Jaeschke R, Adachi J, Guyatt G, Keller J, Wong B. Clinical usefulness of amitriptyline in fibromyalgia: the results of 23 N-of-1 randomized controlled trials. *J Rheumatol* 1991; 18(3):447-451.
- (4) Johannessen T, Petersen H, Kristensen P, Fosstvedt D, Kleveland PM, Dybdahl J et al. Cimetidine on-demand in dyspepsia. Experience with randomized controlled single-subject trials. *Scand J Gastroenterol* 1992; 27(3):189-195.
- (5) Mahon J, Laupacis A, Donner A, Wood T. Randomised study of n of 1 trials versus standard practice. *BMJ* 1996; 312(7038):1069-1074.
- (6) March L, Irwig L, Schwarz J, Simpson J, Chock C, Brooks P. n of 1 trials comparing a non-steroidal anti-inflammatory drug with paracetamol in osteoarthritis. *BMJ* 1994; 309(6961):1041-1045.
- (7) Patel A, Jaeschke R, Guyatt GH, Keller JL, Newhouse MT. Clinical usefulness of n-of-1 randomized controlled trials in patients with nonreversible chronic airflow limitation. *Am Rev Respir Dis* 1991; 144(4):962-964.
- (8) Pereira JA, Holbrook AM, Dolovich L, Goldsmith C, Thabane L, Douketis JD et al. Are brand-name and generic warfarin interchangeable? Multiple n-of-1 randomized, crossover trials. *Ann Pharmacother* 2005; 39(7-8):1188-1193.
- (9) Wallace AE, Kofoed LL. Statistical analysis of single case studies in the clinical setting: the example of methylphenidate trials in children with attention-deficit hyperactivity disorder. *J Child Adolesc Psychopharmacol* 1994; 4(3):141-150.
- (10) Woodfield R, Goodyear-Smith F, Arroll B. N-of-1 trials of quinine efficacy in skeletal muscle cramps of the leg. *Br J Gen Pract* 2005; 55(512):181-185.
- (11) Zucker DR, Ruthazer R, Schmid CH, Feuer JM, Fischer PA, Kieval RI et al. Lessons learned combining N-of-1 trials to assess fibromyalgia therapies. *J Rheumatol* 2006; 33(10):2069-2077.
- (12) Joy TR, Monjed A, Zou GY, Hegele RA, McDonald CG, Mahon JL. N-of-1 (single-patient) trials for statin-related myalgia. *Ann Intern Med* 2014; 160(5):301-310.
- (13) Lipka AF, Vrinten C, van Zwet EW, Schimmel KJ, Cornel MC, Kuijpers MR et al. Ephedrine treatment for autoimmune myasthenia gravis. *Neuromuscul Disord* 2017; 27(3):259-265.
- (14) Camfield P, Gordon K, Dooley J, Camfield C. Melatonin appears ineffective in children with intellectual deficits and fragmented sleep: six "N of 1" trials. *J Child Neurol* 1996; 11(4):341-343.

- 1  
2  
3 (15) Hinderer SR. The supraspinal anxiolytic effect of baclofen for spasticity reduction. *Am J Phys*  
4 *Med Rehabil* 1990; 69(5):254-258.  
5  
6 (16) Langer JC, Winthrop AL, Issenman RM. The single-subject randomized trial. A useful clinical  
7 tool for assessing therapeutic efficacy in pediatric practice. *Clin Pediatr (Phila)* 1993;  
8 32(11):654-657.  
9  
10 (17) Lashner BA, Hanauer SB, Silverstein MD. Testing nicotine gum for ulcerative colitis patients.  
11 Experience with single-patient trials. *Dig Dis Sci* 1990; 35(7):827-832.  
12  
13 (18) Maier W, Benkert O. Treatment of chronic depression with sulpiride: evidence of efficacy in  
14 placebo-controlled single case studies. *Psychopharmacology (Berl)* 1994; 115(4):495-501.  
15  
16 (19) Mandelcorn J, Cullen NK, Bayley MT. A preliminary study of the efficacy of ondansetron in the  
17 treatment of ataxia, poor balance and incoordination from brain injury. *Brain Inj* 2004;  
18 18(10):1025-1039.  
19  
20 (20) McQuay HJ, Carroll D, Jadad AR, Glynn CJ, Jack T, Moore RA et al. Dextromethorphan for the  
21 treatment of neuropathic pain: a double-blind randomised controlled crossover trial with integral  
22 n-of-1 design. *Pain* 1994; 59(1):127-133.  
23  
24 (21) Miyazaki S, Nonogi H, Goto Y, Sumiyoshi T, Haze K, Hiramori K. Comparison of the  
25 therapeutic efficacy of continuous and intermittent injection of isosorbide dinitrate: a randomized  
26 study on unstable angina. *Intern Med* 1995; 34(9):856-862.  
27  
28 (22) Nathan PC, Tomlinson G, Dupuis LL, Greenberg ML, Ota S, Bartels U et al. A pilot study of  
29 ondansetron plus metopimazine vs. ondansetron monotherapy in children receiving highly  
30 emetogenic chemotherapy: a Bayesian randomized serial N-of-1 trials design. *Support Care*  
31 *Cancer* 2006; 14(3):268-276.  
32  
33 (23) Parodi O, Maseri A, Simonetti I. Management of unstable angina at rest by verapamil. A double-  
34 blind cross-over study in coronary care unit. *Br Heart J* 1979; 41(2):167-174.  
35  
36 (24) Parodi O, Simonetti I, Michelassi C, Carpeggiani C, Biagini A, L'Abbate A et al. Comparison of  
37 verapamil and propranolol therapy for angina pectoris at rest: a randomized, multiple-crossover,  
38 controlled trial in the coronary care unit. *Am J Cardiol* 1986; 57(11):899-906.  
39  
40 (25) Tison F, Negre-Pages L, Meissner WG, Dupouy S, Li Q, Thiolat ML et al. Simvastatin decreases  
41 levodopa-induced dyskinesia in monkeys, but not in a randomized, placebo-controlled, multiple  
42 cross-over ("n-of-1") exploratory trial of simvastatin against levodopa-induced dyskinesia in  
43 Parkinson's disease patients. *Parkinsonism Relat Disord* 2013; 19(4):416-421.  
44  
45 (26) Joy TR, Monjed A, Zou GY, Hegele RA, McDonald CG, Mahon JL. N-of-1 (single-patient) trials  
46 for statin-related myalgia. *Ann Intern Med* 2014; 160(5):301-310.  
47  
48  
49  
50  
51  
52  
53  
54  
55  
56  
57  
58  
59  
60

Appendix Table 5. Studies reporting person-level treatment effect with both fixed-effect and random-effect using a method of moments estimator

| Study                         | Outcome                                            | Fixed effect model        | P for HTE (fixed-effects model) | Random Treatment Effect    | summary_tau2 | P for HTE (random-effects model) |
|-------------------------------|----------------------------------------------------|---------------------------|---------------------------------|----------------------------|--------------|----------------------------------|
| March 1994 <sup>6</sup>       | Mean pain score on VAS taken from 2nd week of tx   | -4.155 (-4.807 to -3.502) | <0.001                          | -7.093 (-11.939 to -2.248) | 73.530       | <0.001                           |
| March 1994 <sup>6</sup>       | Mean stiffness score on VAS taken from 2nd week of | -2.192 (-2.549 to -1.835) | <0.001                          | -5.992 (-11.280 to -0.704) | 88.872       | <0.001                           |
| Emmanuel 2012 <sup>1</sup>    | Bloating                                           | -0.131 (-0.171 to -0.090) | <0.001                          | -0.344 (-0.619 to -0.069)  | 0.071        | <0.001                           |
| Emmanuel 2012 <sup>1</sup>    | Pain                                               | -0.160 (-0.209 to -0.111) | <0.001                          | -0.440 (-0.771 to -0.110)  | 0.106        | <0.001                           |
| Haas 2004 <sup>2</sup>        | Chronic tension-type headache grade                | 0.733 (0.609 to 0.857)    | <0.001                          | 0.772 (0.454 to 1.090)     | 0.350        | <0.001                           |
| Haas 2004 <sup>2</sup>        | Chronic tension-type headache grade                | 0.543 (0.394 to 0.693)    | 0.067                           | 0.542 (0.354 to 0.731)     | 0.055        | 0.067                            |
| Jaeschke 1991 <sup>3</sup>    | 7-point symptom scale                              | 0.356 (0.286 to 0.426)    | <0.001                          | 0.427 (0.210 to 0.645)     | 0.186        | <0.001                           |
| Jaeschke 1991 <sup>3</sup>    | Tender point changes count                         | 1.072 (0.701 to 1.443)    | <0.001                          | 1.320 (0.404 to 2.236)     | 2.166        | <0.001                           |
| Johannessen 1992 <sup>4</sup> | 6-point symptom scale                              | 0.657 (0.530 to 0.785)    | <0.001                          | 0.698 (0.466 to 0.931)     | 0.382        | <0.001                           |
| Joy 2014 <sup>26</sup>        | VAS myalgia score                                  | 0.119 (-2.283 to 2.521)   | 0.995                           | 0.119 (-2.283 to 2.521)    | 0.000        | 0.996                            |
| Joy 2014 <sup>26</sup>        | Symptom-specific VAS                               | 1.937 (0.179 to 3.696)    | 0.797                           | 1.937 (0.179 to 3.696)     | 0.000        | 0.797                            |
| Joy 2014 <sup>26</sup>        | Pain severity score                                | 0.086 (-0.215 to 0.387)   | 0.986                           | 0.086 (-0.215 to 0.387)    | 0.000        | 0.986                            |

|                              |                                      |                           |        |                             |         |        |
|------------------------------|--------------------------------------|---------------------------|--------|-----------------------------|---------|--------|
| Joy 2014 <sup>26</sup>       | Pain interference score              | -0.016 (-0.095 to 0.064)  | 0.917  | -0.016 (-0.095 to 0.064)    | 0.000   | 0.917  |
| Lipka 2017 <sup>13</sup>     | Quantitative myasthenia gravis score | 1.006 (0.215 to 1.797)    | 0.803  | 1.006 (0.215 to 1.797)      | 0.000   | 0.803  |
| Lipka 2017 <sup>13</sup>     | Myasthenia gravis composite          | 2.952 (0.969 to 4.934)    | 0.177  | 2.891 (0.348 to 5.433)      | 2.631   | 0.177  |
| Lipka 2017 <sup>13</sup>     | MG-ADL                               | 1.110 (0.269 to 1.951)    | 0.047  | 1.099 (-0.277 to 2.474)     | 1.222   | 0.047  |
| Lipka 2017 <sup>13</sup>     | VAS score                            | 1.204 (0.124 to 2.283)    | 0.190  | 1.275 (-0.115 to 2.665)     | 0.739   | 0.190  |
| Mahon 1996 <sup>5</sup>      | Likert Scale (1-7)                   | 0.069 (-0.042 to 0.179)   | <0.001 | 0.145 (-0.153 to 0.443)     | 0.134   | <0.001 |
| Patel 1991 <sup>7</sup>      | 4-item symptom questionnaire         | 0.000 (-0.000 to 0.000)   | <0.001 | 0.000 (-0.000 to 0.000)     | 0.000   | <0.001 |
| Pereira 1995 <sup>8</sup>    | INR (diff)                           | 0.027 (-0.155 to 0.209)   | 0.477  | 0.027 (-0.155 to 0.209)     | 0.000   | 0.477  |
| Wallace 1994 <sup>9</sup>    | Conners 15-item rating scale scores  | 0.759 (0.341 to 1.178)    | 0.747  | 0.759 (0.341 to 1.178)      | 0.000   | 0.747  |
| Woodfield 2005 <sup>10</sup> | Number of cramps                     | -5.395 (-7.091 to -3.699) | <0.001 | -18.823 (-28.527 to -9.120) | 161.582 | <0.001 |
| Woodfield 2005 <sup>10</sup> | Total days with cramps               | -7.600 (-8.420 to -6.781) | <0.001 | -6.181 (-9.798 to -2.563)   | 26.245  | <0.001 |
| Zucker 2006 <sup>11</sup>    | FIQ                                  | -5.019 (-8.784 to -1.254) | 0.999  | -5.019 (-8.784 to -1.254)   | 0.000   | 0.999  |



Appendix Table 6. Studies reporting person-level outcomes with both fixed-effect and random-effect hierarchical linear model

| Author Year                             | Outcome                                          | Range of the Scales<br>(severity)                                             | Fixed Treatment Effect     | Random Treatment Effect  | P-value Person<br>Treatment<br>Interaction |
|-----------------------------------------|--------------------------------------------------|-------------------------------------------------------------------------------|----------------------------|--------------------------|--------------------------------------------|
| <b>Camfield<br/>1996<sup>14</sup></b>   | Nights without awakening                         | NR                                                                            | 0.865 (0.215 to 1.516)     | 0.84 (0.20 to 1.48)      | 0.456                                      |
| <b>Hinderer<br/>1990<sup>15</sup></b>   | Anxiety                                          | Beck Inventory-A anxiety<br>scale 0-3 (0 = never, 3 =<br>almost all the time) | 0.000 (0.000 to 0.000)     | -1.06 (-1.88 to -0.23)   | <0.001                                     |
| <b>Joy 2014<sup>26</sup></b>            | Myalgia score                                    | Visual Analogue Score for<br>myalgia (0=none to<br>100=worst)                 | 3.3812 (-2.668 to 9.430)   | 3.3522 (-2.617 to 9.322) | 0.566                                      |
| <b>Langer 1993<sup>16</sup></b>         | Vomiting                                         | NR                                                                            | -1.204 (-2.494 to 0.086)   | -1.20 (-2.49 to 0.09)    | 0.136                                      |
| <b>Lashner<br/>1990<sup>17</sup></b>    | Symptom score: abdominal pain                    | Symptom scores 0-100<br>(0=best, 100=worst)                                   | -3.615 (-16.982 to 9.751)  | -3.62 (-15.84 to 8.61)   | 0.007                                      |
|                                         | Symptom score: bowel<br>movements/day            |                                                                               | -0.538 (-1.215 to 0.138)   | -0.56 (-1.22 to 0.09)    | 0.001                                      |
|                                         | Symptom score: consistency of<br>bowel movements |                                                                               | 7.000 (-7.551 to 21.551)   | 7.00 (-6.29 to 20.29)    | 0.013                                      |
|                                         | Symptom score: hematochezia                      |                                                                               | 2.308 (-17.210 to 21.826)  | 2.35 (-17.21 to 21.90)   | 0.003                                      |
|                                         | Symptom score: general sense of<br>well-being    |                                                                               | -6.538 (-25.352 to 12.275) | -6.54 (-23.62 to 10.56)  | 0.008                                      |
| <b>Maier<br/>1994<sup>18</sup></b>      | SCL-90 subscales: Depressed mood                 | NR                                                                            | -3.536 (-6.718 to -0.354)  | -3.63 (-7.40 to 0.15)    | <0.001                                     |
|                                         | SCL-90 subscales: Anxiety                        |                                                                               | -3.753 (-6.582 to -0.924)  | -3.81 (-7.22 to -0.40)   | <0.001                                     |
|                                         | SCL-90 subscales: Somatization                   |                                                                               | -1.419 (-4.316 to 1.478)   | -1.50 (-4.20 to 1.21)    | 0.869                                      |
| <b>Mandelcorn<br/>2004<sup>19</sup></b> | Self-Assessment score                            | 0-5 (0=worst, 5=best)                                                         | -2.052 (-8.865 to 4.761)   | -2.05 (-8.43 to 4.33)    | 0.05                                       |
|                                         | Lower extremity ataxia                           | Fugl-Meyer: 3-point (0<br>cannot be performed to 2 can                        | 12.494 (-3.155 to 28.142)  | 12.49 (-0.85 to 25.84)   | 0.025                                      |

| Author Year                           | Outcome                                             | Range of the Scales<br>(severity)                                                                                                                                                        | Fixed Treatment Effect    | Random Treatment Effect | P-value Person<br>Treatment<br>Interaction |
|---------------------------------------|-----------------------------------------------------|------------------------------------------------------------------------------------------------------------------------------------------------------------------------------------------|---------------------------|-------------------------|--------------------------------------------|
|                                       |                                                     | be fully performed)                                                                                                                                                                      |                           |                         |                                            |
|                                       | Truncal ataxia                                      | AMTI forceplate®: NR<br><br><i>Berg Balance Scale® 0–56,<br/>with a higher score indicating<br/>a better performance</i>                                                                 | 1.196 (-2.866 to 5.257)   | 1.20 (-2.06 to 4.45)    | 0.690                                      |
|                                       | Upper extremity ataxia                              | Purdue Pegboard Test®: pegs<br>inserted into the board with<br>each hand in 30 sec<br><br><i>Minnesota Placing Test®:<br/>reach out, grasp, and place<br/>blocks in a specific order</i> | -0.498 (-3.546 to 2.550)  | -0.50 (-3.10 to 2.10)   | 0.382                                      |
| <b>McQuay<br/>1994<sup>20</sup></b>   | VAS Pain Intensity                                  | 0-100 (0 = no pain, 100 =<br>worst possible pain)                                                                                                                                        | -1.094 (-5.572 to 3.383)  | -1.06 (-5.16 to 3.04)   | 0.004                                      |
|                                       | VAS Relief Intensity                                | 0-100 (0 = no relief, 100<br>=complete pain relief)                                                                                                                                      | -3.913 (-11.729 to 3.903) | -3.86 (-11.11 to 3.40)  | 0.038                                      |
| <b>Miyazaki<br/>1995<sup>21</sup></b> | Incidence of angina                                 | Either ST-segment elevation<br>or depression at rest                                                                                                                                     | 0.496 (-0.206 to 1.199)   | 0.47 (-0.32 to 1.26)    | 0.125                                      |
| <b>Nathan 2006<sup>22</sup></b>       | Emetic episodes per day                             | complete response (0<br>episodes/day), major response<br>(1–2 episodes/day), or failure<br>(>2 episodes/day)                                                                             | -0.095 (-0.514 to 0.325)  | -0.56 (-1.74 to 0.62)   | 0.001                                      |
| <b>Parodi<br/>1979<sup>23</sup></b>   | Ischemic attacks                                    | ST elevation or depression<br>(details NR)                                                                                                                                               | -1.544 (-1.838 to -1.251) | -1.63 (-2.10 to -1.17)  | 0.007                                      |
| <b>Parodi<br/>1986<sup>24</sup></b>   | Asymptomatic ST elevation<br><br>(After verapamil)  | NR                                                                                                                                                                                       | -1.637 (-1.994 to -1.279) | -1.97 (-2.92 to -1.01)  | 0.110                                      |
|                                       | Asymptomatic ST depression<br><br>(After verapamil) |                                                                                                                                                                                          | -1.083 (-1.903 to -0.262) | -0.82 (-2.54 to 0.90)   | 0.401                                      |

| Author Year                     | Outcome                                           | Range of the Scales<br>(severity)                                            | Fixed Treatment Effect    | Random Treatment Effect   | P-value Person<br>Treatment<br>Interaction |
|---------------------------------|---------------------------------------------------|------------------------------------------------------------------------------|---------------------------|---------------------------|--------------------------------------------|
|                                 | Symptomatic ST elevation<br>(After verapamil)     |                                                                              | -1.580 (-1.906 to -1.254) | -1.87 (-2.72 to -1.02)    | <0.001                                     |
|                                 | Symptomatic ST Depression<br>(After verapamil)    |                                                                              | -0.990 (-1.411 to -0.569) | -0.98 (-1.84 to -0.13)    | 0.002                                      |
|                                 | Asymptomatic ST elevation<br>(After propranolol)  |                                                                              | 0.100 (-0.086 to 0.286)   | -1.966 (-2.917 to -1.014) | 0.006                                      |
|                                 | Asymptomatic ST depression<br>(After propranolol) |                                                                              | 0.339 (-0.168 to 0.845)   | -0.821 (-2.539 to 0.897)  | 0.964                                      |
|                                 | Symptomatic ST elevation<br>(After propranolol)   |                                                                              | -0.002 (-0.177 to 0.173)  | -1.868 (-2.718 to -1.017) | 0.063                                      |
|                                 | Symptomatic ST Depression<br>(After propranolol)  |                                                                              | -0.374 (-0.709 to -0.039) | -0.981 (-1.835 to -0.126) | 0.023                                      |
| <b>Pereira 1995<sup>8</sup></b> | INR                                               | Target INR range of 2.0–3.0                                                  |                           | -0.12 (-0.30 to 0.07)     | 0.433                                      |
| <b>Tison 2012<sup>25</sup></b>  | Troublesome dyskinesia                            | 7 points scale (1=extremely<br>uncomfortable, 7=not at all<br>uncomfortable) |                           | 0.20 (-0.40 to 0.80)      | 0.593                                      |

## Statistical codes for analysis results of studies reporting person-level treatment effects

Estimation of standard errors in the following studies

- Emmanuel 2012:  $\text{gen SE}_{\text{Intervention (or control)}} = \text{SD of intervention (or control) score} / \text{square root of Intervention days (or control days)}$
- Haas 2004: SE was available in Table 4 of the original paper
- Jaeschke 1991, Patel 1991, March 1994, Woodfield 2005, Wallace 1994 - SE was derived using the p-value of one-sided paired t-test of the difference in score using the following code:  
generate t\_stat = invt(2,p\_value)  
generate se = abs(mean\_outcome/t\_stat)
- Johannessen 1992, Pereira 1995, Zucker 2006, Joy 2014, Lipka 2017 – SE was derived from the 95% confidence interval using the following code: generate se =  $(\text{UCI} - \text{LCI}) / (2 * \text{invnorm}(0.975))$
- Mahon 1996: SE was derived from 95% confidence interval based on Student's t distribution using the following code: generate se =  $(\text{UCI} - \text{LCI}) / (2 * \text{invt}(\text{DF}, 0.975))$

metan difference se\_difference if Outcome == "outcome", random \*\*/fixedi is used for fixed effect model

local p = r(p\_het)

local sum\_es = r(ES)

local sum\_es\_se = r(seES)

local tau2= r(tau2)

local I\_sq = r(i\_sq)

post `memory' ("`study'") ("`outcome'") (`sum\_es') (`sum\_es\_se') (`tau2') (`I\_sq') (`p')

**Statistical codes for analysis results of studies reporting person-level outcome effects**

```
1
2
3
4
5 egen id = group(Patient)
6
7 generate tx = 0 if Exposure == "Placebo"
8
9     replace tx = 1 if Exposure == "Intervention"
10
11 egen period_seq = seq(), from(1) to(18) */varies based on the number of periods*/
12
13 local outcome = "Specific_outcome"
14
15     /* fixed baselines and random treatment effects */
16
17     xtmixed Result tx i.id || id: tx if Outcome == "`outcome'" , nocons
18
19         estimates store D
20
21         matrix estimates = e(b)
22
23         local point_estimate_ran_bas_ran_tx = estimates[1,1]
24
25         local sd_estimate_rand_base_random_tx = (exp(estimates[1,10]))
26
27
28
29
30         matrix variances = e(V)
31
32         local point_se_rand_base_random_tx = sqrt(variances[1,1])
33
34         local point_low_ran_bas_ran_tx = `point_estimate_ran_bas_ran_tx' - invnormal(0.975) * `point_se_rand_base_random_tx'
35
36         local point_up_ran_bas_ran_tx = `point_estimate_ran_bas_ran_tx' + invnormal(0.975) * `point_se_rand_base_random_tx'
37
38
39
40         local sd_se_rand_base_random_tx = sqrt(variances[10,10])
41
42
43
44
45
46
47
```

```
1
2
3     local sd_lower_rand_base_random_tx = (exp(ln(`sd_estimate_rand_base_random_tx')) - invnormal(0.975) *
4 `sd_se_rand_base_random_tx'))
5
6     local sd_upper_rand_base_random_tx = (exp(ln(`sd_estimate_rand_base_random_tx')) + invnormal(0.975) *
7 `sd_se_rand_base_random_tx'))
8
9
10
11     /* fixed baselines and common treatment effect -- linear regression */
12
13     xtmixed Result tx i.id || id: if Outcome == "`outcome'" , nocons
14
15     estimates store E
16
17
18
19
20     /* fixed baselines and person interactions */
21
22     regress Result i.tx##i.id if Outcome == "`outcome'"
23
24     estimates store F
25
26
27
28     /* fixed baselines and common effects */
29
30     regress Result tx i.id if Outcome == "`outcome'"
31
32     estimates store G
33
34
35
36     matrix estimates = e(b)
37
38     local point_estimate_fix_bas_com_tx = estimates[1,1]
39
40
41
42
43
44
45
46
47
```

```
1
2
3     matrix variances = e(V)
4
```

```
5     local point_se_fix_bas_common_tx = sqrt(variances[1,1])
6
```

```
7     local t_stat = `point_estimate_fix_bas_com_tx' / `point_se_fix_bas_common_tx'
```

```
8
9     local point_low_fix_bas_com_tx = `point_estimate_fix_bas_com_tx' - invt(e(df_r), 0.975) * `point_se_fix_bas_common_tx'
```

```
10
11     local point_up_fix_bas_com_tx = `point_estimate_fix_bas_com_tx' + invt(e(df_r), 0.975) * `point_se_fix_bas_common_tx'
```

```
12
13
14
15 lrtest D E
```

```
16
17     local p_random_RANDOM_FIXED_tx = r(p)
18
```

```
19
20
21 lrtest F G
```

```
22
23     local p_person_by_treat = r(p)
24
```

```
25
26
27     post `memory' ("Study") ("`outcome'")
28
```

```
29
30 Please note: Depending on the outcome, xtmixed or meqrlogit or meqrpoisson was used.
```

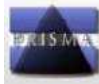

# PRISMA 2009 Checklist

| Section/topic                      | #  | Checklist item                                                                                                                                                                                                                                                                                              | Reported on page # |
|------------------------------------|----|-------------------------------------------------------------------------------------------------------------------------------------------------------------------------------------------------------------------------------------------------------------------------------------------------------------|--------------------|
| <b>TITLE</b>                       |    |                                                                                                                                                                                                                                                                                                             |                    |
| Title                              | 1  | Identify the report as a systematic review, meta-analysis, or both.                                                                                                                                                                                                                                         | 1                  |
| <b>ABSTRACT</b>                    |    |                                                                                                                                                                                                                                                                                                             |                    |
| Structured summary                 | 2  | Provide a structured summary including, as applicable: background; objectives; data sources; study eligibility criteria, participants, and interventions; study appraisal and synthesis methods; results; limitations; conclusions and implications of key findings; systematic review registration number. | 2                  |
| <b>INTRODUCTION</b>                |    |                                                                                                                                                                                                                                                                                                             |                    |
| Rationale                          | 3  | Describe the rationale for the review in the context of what is already known.                                                                                                                                                                                                                              | 1-2                |
| Objectives                         | 4  | Provide an explicit statement of questions being addressed with reference to participants, interventions, comparisons, outcomes, and study design (PICOS).                                                                                                                                                  | 2                  |
| <b>METHODS</b>                     |    |                                                                                                                                                                                                                                                                                                             |                    |
| Protocol and registration          | 5  | Indicate if a review protocol exists, if and where it can be accessed (e.g., Web address), and, if available, provide registration information including registration number.                                                                                                                               | n/a                |
| Eligibility criteria               | 6  | Specify study characteristics (e.g., PICOS, length of follow-up) and report characteristics (e.g., years considered, language, publication status) used as criteria for eligibility, giving rationale.                                                                                                      | 5-6                |
| Information sources                | 7  | Describe all information sources (e.g., databases with dates of coverage, contact with study authors to identify additional studies) in the search and date last searched.                                                                                                                                  | 5-6                |
| Search                             | 8  | Present full electronic search strategy for at least one database, including any limits used, such that it could be repeated.                                                                                                                                                                               | a1-a3              |
| Study selection                    | 9  | State the process for selecting studies (i.e., screening, eligibility, included in systematic review, and, if applicable, included in the meta-analysis).                                                                                                                                                   | 6                  |
| Data collection process            | 10 | Describe method of data extraction from reports (e.g., piloted forms, independently, in duplicate) and any processes for obtaining and confirming data from investigators.                                                                                                                                  | 6-7                |
| Data items                         | 11 | List and define all variables for which data were sought (e.g., PICOS, funding sources) and any assumptions and simplifications made.                                                                                                                                                                       | 6-8                |
| Risk of bias in individual studies | 12 | Describe methods used for assessing risk of bias of individual studies (including specification of whether this was done at the study or outcome level), and how this information is to be used in any data synthesis.                                                                                      | n/a                |
| Summary measures                   | 13 | State the principal summary measures (e.g., risk ratio, difference in means).                                                                                                                                                                                                                               | 8-9                |
| Synthesis of results               | 14 | Describe the methods of handling data and combining results of studies, if done, including measures of consistency (e.g., $I^2$ ) for each meta-analysis.                                                                                                                                                   | 8-9                |



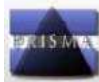

# PRISMA 2009 Checklist

1  
2  
3  
4  
5  
6  
7  
8  
9  
10  
11  
12  
13  
14  
15  
16  
17  
18  
19  
20  
21  
22  
23  
24  
25  
26  
27  
28  
29  
30  
31  
32  
33  
34  
35  
36  
37  
38  
39  
40  
41  
42  
43  
44  
45  
46  
47

| Section/topic                 | #  | Checklist item                                                                                                                                                                                           | Reported on page # |
|-------------------------------|----|----------------------------------------------------------------------------------------------------------------------------------------------------------------------------------------------------------|--------------------|
| Risk of bias across studies   | 15 | Specify any assessment of risk of bias that may affect the cumulative evidence (e.g., publication bias, selective reporting within studies).                                                             | n/a                |
| Additional analyses           | 16 | Describe methods of additional analyses (e.g., sensitivity or subgroup analyses, meta-regression), if done, indicating which were pre-specified.                                                         | 8-9                |
| <b>RESULTS</b>                |    |                                                                                                                                                                                                          |                    |
| Study selection               | 17 | Give numbers of studies screened, assessed for eligibility, and included in the review, with reasons for exclusions at each stage, ideally with a flow diagram.                                          | 9, 20, 21, 29      |
| Study characteristics         | 18 | For each study, present characteristics for which data were extracted (e.g., study size, PICOS, follow-up period) and provide the citations.                                                             | 1-12, 22-26        |
| Risk of bias within studies   | 19 | Present data on risk of bias of each study and, if available, any outcome level assessment (see item 12).                                                                                                | n/a                |
| Results of individual studies | 20 | For all outcomes considered (benefits or harms), present, for each study: (a) simple summary data for each intervention group (b) effect estimates and confidence intervals, ideally with a forest plot. | 31, a11-a50        |
| Synthesis of results          | 21 | Present results of each meta-analysis done, including confidence intervals and measures of consistency.                                                                                                  | 10-12, 26          |
| Risk of bias across studies   | 22 | Present results of any assessment of risk of bias across studies (see Item 15).                                                                                                                          | n/a                |
| Additional analysis           | 23 | Give results of additional analyses, if done (e.g., sensitivity or subgroup analyses, meta-regression [see Item 16]).                                                                                    | 12, a53-a57        |
| <b>DISCUSSION</b>             |    |                                                                                                                                                                                                          |                    |
| Summary of evidence           | 24 | Summarize the main findings including the strength of evidence for each main outcome; consider their relevance to key groups (e.g., healthcare providers, users, and policy makers).                     | 12-14              |
| Limitations                   | 25 | Discuss limitations at study and outcome level (e.g., risk of bias), and at review-level (e.g., incomplete retrieval of identified research, reporting bias).                                            | 15-16              |
| Conclusions                   | 26 | Provide a general interpretation of the results in the context of other evidence, and implications for future research.                                                                                  | 16                 |
| <b>FUNDING</b>                |    |                                                                                                                                                                                                          |                    |
| Funding                       | 27 | Describe sources of funding for the systematic review and other support (e.g., supply of data); role of funders for the systematic review.                                                               | 17                 |

From: Moher D, Liberati A, Tetzlaff J, Altman DG, The PRISMA Group (2009). Preferred Reporting Items for Systematic Reviews and Meta-Analyses: The PRISMA Statement. PLoS Med 6(6): e1000097. doi:10.1371/journal.pmed1000097

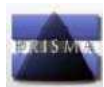

# PRISMA 2009 Checklist

For peer review only

- 1
- 2
- 3
- 4
- 5
- 6
- 7
- 8
- 9
- 10
- 11
- 12
- 13
- 14
- 15
- 16
- 17
- 18
- 19
- 20
- 21
- 22
- 23
- 24
- 25
- 26
- 27
- 28
- 29
- 30
- 31
- 32
- 33
- 34
- 35
- 36
- 37
- 38
- 39
- 40
- 41
- 42
- 43
- 44
- 45
- 46
- 47

# BMJ Open

## Evaluation of person-level heterogeneity of treatment effects in published multi-person N-of-1 studies: systematic review and re-analysis

|                                 |                                                                                                                                                                                                                                                                                                                                                                                                                                                            |
|---------------------------------|------------------------------------------------------------------------------------------------------------------------------------------------------------------------------------------------------------------------------------------------------------------------------------------------------------------------------------------------------------------------------------------------------------------------------------------------------------|
| Journal:                        | <i>BMJ Open</i>                                                                                                                                                                                                                                                                                                                                                                                                                                            |
| Manuscript ID                   | bmjopen-2017-017641.R2                                                                                                                                                                                                                                                                                                                                                                                                                                     |
| Article Type:                   | Research                                                                                                                                                                                                                                                                                                                                                                                                                                                   |
| Date Submitted by the Author:   | 22-Feb-2018                                                                                                                                                                                                                                                                                                                                                                                                                                                |
| Complete List of Authors:       | Raman, G; Tufts Medical Center<br>Balk, EM; Brown University<br>Lai, Lana; Tufts Medical Center<br>Shi, Jennifer; Tufts Medical Center<br>Chan, Jeffrey; VA Boston Healthcare System, Center for Healthcare Organization and Implementation Research (CHOIR)<br>Lutz, Jennifer; Tufts Medical Center<br>Dubois, Robert; National Pharmaceutical Council, Research<br>Kravitz, Richard; University of California Davis<br>Kent, David; Tufts Medical Center |
| <b>Primary Subject Heading</b>: | Patient-centred medicine                                                                                                                                                                                                                                                                                                                                                                                                                                   |
| Secondary Subject Heading:      | Research methods                                                                                                                                                                                                                                                                                                                                                                                                                                           |
| Keywords:                       | personalized medicine, n-of-1 studies, systematic review, heterogeneity of treatment effect                                                                                                                                                                                                                                                                                                                                                                |
|                                 |                                                                                                                                                                                                                                                                                                                                                                                                                                                            |

SCHOLARONE™  
Manuscripts



1  
2  
3 **Evaluation of person-level heterogeneity of treatment effects in published multi-person N-**  
4 **of-1 studies: systematic review and re-analysis**  
5  
6  
7  
8  
9

10 Gowri Raman, MD, MS<sup>a</sup>; Ethan M Balk, MD, MPH<sup>b</sup>; Lana Lai, MS<sup>c</sup>; Jennifer Shi, BA<sup>d</sup>; Jeff  
11 Chan, MD<sup>a,e</sup>; Jennifer Lutz, MA<sup>c</sup>; Robert Dubois, MD, PhD<sup>f</sup>; Richard L Kravitz, MD, MSPH<sup>g</sup>;  
12 David M Kent, MD, MS<sup>\*c</sup>  
13  
14  
15

16 <sup>a</sup>Center for Clinical Evidence Synthesis, ICRHPS, Medical Center/Tufts University School of  
17 Medicine, Boston, USA; <sup>b</sup>Center for Evidence Synthesis in Health, School of Public Health,  
18 Brown University, Providence, RI; <sup>c</sup>Predictive Analytics and Comparative Effectiveness (PACE)  
19 Center, Institute for Clinical Research and Health Policy Studies, Tufts Medical Center/Tufts  
20 University School of Medicine, Boston, USA; <sup>d</sup>Center for the Evaluation of Value and Risk in  
21 Health, ICRHPS, Medical Center/Tufts University School of Medicine, Boston, USA; <sup>e</sup>VA  
22 Boston Healthcare System, Center for Healthcare Organization and Implementation Research  
23 (CHOIR); <sup>f</sup>National Pharmaceutical Council; <sup>g</sup>Department of Internal Medicine, University of  
24 California, Davis  
25  
26  
27  
28  
29  
30

31 **Corresponding Author:**

32 David Kent, MD, MS  
33 Director, Predictive Analytics and Comparative Effectiveness (PACE) Center  
34 Institute for Clinical Research and Health Policy Studies  
35 Tufts Medical Center  
36 800 Washington St, Box 63  
37 Boston, MA 02111  
38 Email: dkent1@tuftsmedicalcenter.org  
39 Phone: 617-636-3234  
40  
41  
42

43 **Running title: Variation in person-level treatment effects: systematic review**

44 **Word count**

45 Abstract: 224

46 Main text: 4,259 (main text, references)

47 Table: 5

48 Figures: 3

49 **Key words:** n-of-1 studies, systematic review, heterogeneity of treatment effect, personalized  
50 medicine  
51  
52  
53  
54  
55  
56  
57  
58  
59  
60

## Abstract

**Objective:** Individual patients with the same condition may respond differently to similar treatments. Our aim is to summarize the reporting of person-level heterogeneity of treatment effects (HTE) in multi-person N-of-1 studies and to examine the evidence for person-level HTE through re-analysis.

**Study Design:** Systematic review and re-analysis of multi-person N-of-1 studies.

**Data sources:** Medline, Cochrane Controlled Trials, EMBASE, Web of Science, and review of references through August 2017 for N-of-1 studies published in English.

**Study Selection:** N-of-1 studies of pharmacological interventions with at least two subjects.

**Data Synthesis:** Citation screening and data extractions were performed in duplicate. We performed statistical reanalysis testing for person-level HTE on all studies presenting person-level data.

**Results:** We identified 62 multi-person N-of-1 studies with at least two subjects. Statistical tests examining HTE were described in only 13 (21%), of which only two (3%) tested person-level HTE. Only 25 studies (40%) provided person-level data sufficient to re-analyze person-level HTE. Reanalysis using a fixed effect linear model identified statistically significant person-level HTE in 8 of the 13 studies (62%) reporting person-level treatment effects and in 8 of the 14 studies (57%) reporting person-level outcomes.

**Conclusions:** Our analysis suggests person-level HTE is common and often substantial. Reviewed studies had incomplete information on person-level treatment effects and their variation. Improved assessment and reporting of person-level treatment effects in multi-person N-of-1 studies are needed.

**Strengths and limitations of this study**

- Multi-person N-of-1 studies are the best design to estimate individual patient treatment effects and compare the variation in effects between individuals to variation within individuals across different periods.
- Our analysis suggests person-level HTE is common and often substantial.
- Our analysis was limited by the paucity of N-of-1 studies in the literature and by the low statistical power in the available studies.

view only

## Introduction

Clinicians commonly observe that individual patients given the same treatment for the same condition appear to respond differently from one another. This observation, combined with our understanding of the complex mechanisms of diseases and therapies and the potential importance of myriad patient-specific factors (e.g., age, sex, illness severity, comorbidities, co-treatments, and molecular differences influencing pharmacokinetics and -dynamics), have led to a widely held assumption that the observed variation in treatment response seen between individuals is not merely random, but stable and potentially predictable. This assumption underpins the field of personalized medicine, which aims to determine the best treatment for an individual patient, as opposed to treating all patients with the intervention found to be most effective for the “average” patient.

Nevertheless, statistical analyses aimed at discovering heterogeneity of treatment effects (HTE) among groups of individuals (for example subgroup analyses of parallel arm randomized trials) typically fail to find compelling and reliable evidence for the presence of such heterogeneity. For example, statistically significant differences in treatment effects between men and women are often reported, but a systematic review indicates that the frequency of these interactions across studies suggests the vast majority occur by chance.<sup>1</sup> Similarly, the field of pharmacogenetics, also built on the assumption of stable variation in treatment responses, has largely failed to live up to its promise to broadly improve the targeting of drugs—particularly outside the special case of oncology (where studies generally depend on the subclassification of tumor tissue not on variation in germline polymorphisms).<sup>2;3</sup> This failure to find reproducible HTE has supported the contrarian notion that true individual effects may be a “myth,” an over-interpretation of random noise.<sup>4</sup>

1  
2  
3 To distinguish between these two possibilities, Kalow et al. have suggested that carefully  
4  
5 designed series of N-of-1 studies could be performed for those chronic conditions amenable to  
6  
7 this design (i.e., where the disease process is relatively stable over time, treatment effects are  
8  
9 transient, and outcomes vary and are observable over time).<sup>5</sup> By estimating individual patient  
10  
11 treatment effects and comparing the variation in effects *between* individuals to variation *within*  
12  
13 individuals across different periods, it is possible to determine the non-random component of  
14  
15 heterogeneity in individual treatment effects—even if one is unable to identify the variables that  
16  
17 predict this variation (i.e., even in the absence of group-level HTE, such as men versus women,  
18  
19 or old versus young).

20  
21  
22  
23  
24 A recent review summarized N-of-1 studies reported in the literature—including multi-  
25  
26 person N-of-1 studies—but did not examine whether and how these studies provide information  
27  
28 on person-level HTE. Therefore our objectives are: 1) to summarize the conduct and reporting of  
29  
30 assessments of variation in person-level treatment effects from N-of-1 studies; and 2) to extract,  
31  
32 reanalyze and report the results from the subset of studies that provided adequate data in their  
33  
34 published reports to examine the extent of the evidence for person-level HTE (i.e., participant-  
35  
36 level outcomes or effects).<sup>6</sup>

## 37 38 39 40 41 42 **Methods**

43  
44  
45  
46 This review was conducted in accordance with the highest standards for conducting  
47  
48 systematic reviews.<sup>7;8</sup> We defined N-of-1 studies as crossover trials in which each patient  
49  
50 receives two or more treatments in a pre-defined, often randomized, sequence.

## 51 52 53 54 ***Data Sources and Searches***



1  
2  
3 We used two separate searches because N-of-1 studies can be indexed differently: (1) a  
4 search in Medline, Cochrane Central and EMBASE using terms related to repeated crossover  
5 studies (for publications indexed from inception to August 17, 2017); and (2) a Medline,  
6  
7  
8  
9  
10 Cochrane Central, EMBASE, and Web of Science search using terms that are related to N-of-1  
11  
12 (for publications indexed from 2011 to August 17, 2017). For N-of-1 studies indexed before  
13  
14 2011, we used studies included in a prior published systematic review by Gabler et al.<sup>6</sup> Our  
15  
16 searches combined terms and Medical Subject Headings for N-of-1, single-subject, single-  
17  
18 patient, randomized trials, crossover, multi-period crossover, and rotated or repeated period  
19  
20 crossover (see Appendix Tables 1-2 for detailed search terms). The searches were not restricted  
21  
22 by disease, condition, organ system, or treatment.  
23  
24  
25  
26  
27

### 28 *Study Selection*

29  
30 We selected eligible multi-person N-of-1 studies to describe the frequency of reporting of  
31  
32 individual outcomes and effects and of documented HTE in these studies. We required a  
33  
34 minimum of two individual subjects per study for evaluation of HTE. We excluded studies that  
35  
36 included non-pharmacological interventions, reviews, abstracts and protocols. We include  
37  
38 studies with placebo or “no treatment” interventions. Citations were double-screened by  
39  
40 reviewers using an open-source, online software Abstrackr (<http://abstrackr.cebm.brown.edu/>).  
41  
42 Full-text articles of potentially relevant studies were again double screened for eligibility.  
43  
44  
45  
46

47 Person-level outcomes were defined as outcomes for each person at each point in time  
48  
49 when they were measured, reported in tables, text, or graphs. Person-level treatment effect was  
50  
51 defined as contrasts of outcomes in individuals on one treatment versus the comparator. Person-  
52  
53 level HTE was defined as quantified variation in the person-level treatment effects, whereas HTE  
54  
55  
56  
57  
58  
59  
60

1  
2  
3 more broadly includes any type of subgroup analysis (e.g., males versus females; older versus  
4  
5 younger) as outlined in **Figure 1**.

### 6 7 8 ***Data Extraction and Quality Assessment***

9  
10 One of four reviewers extracted data from each publication; a second reviewer verified  
11  
12 all numerical information and basic descriptors of the study design and analysis. Operational  
13  
14 definitions for extraction items were discussed in weekly project meetings and discrepancies  
15  
16 between extractors were resolved by consensus with senior authors (DK, GR, EB). From each  
17  
18 study, we extracted bibliographic information, details related to study design (number of patients  
19  
20 enrolled, selection criteria, interventions evaluated, randomization methods, outcomes assessed,  
21  
22 follow-up duration), information on patient characteristics, and person-level measurements of  
23  
24 outcomes or estimates of person-level treatment effects (with corresponding measures of their  
25  
26 uncertainty). When necessary, we extracted data by digitizing the graphs and the values were  
27  
28 estimated using Engauge Digitizer version 2.14 (<http://digitizer.sourceforge.net/>). We assessed  
29  
30 the methodological quality of each study based on predefined criteria, in accordance with the  
31  
32 Agency for Healthcare Research and Quality (AHRQ) suggested methods and the Cochrane risk  
33  
34 of bias for clinical trials.<sup>9;10</sup>

35  
36  
37  
38  
39  
40 We generated graphs showing the trajectory of response for each patient in each study  
41  
42 and compared them against the published information. We also generated scatterplots of  
43  
44 measurements over time for studies that did not present their data in graphical format to help us  
45  
46 identify aberrant data points (e.g., errors in data extraction). We verified potentially aberrant data  
47  
48 points by re-examining the published data and made corrections, when needed.

### 49 50 51 ***Data Synthesis and Analyses***

1  
2  
3 We examined the degree to which studies reported person-level data. This was described  
4 using the following items for each reported outcome: 1) qualitative descriptions of HTE (e.g.,  
5 “there were 8 responders and 4 non-responders”); 2) details of person-level outcomes (i.e.,  
6 outcomes with each treatment within each period); 3) details of person-level treatment effect  
7 (i.e., a point estimate of contrasts of outcomes in individuals on one treatment versus the  
8 comparator); 4) reporting of person-level statistical effect estimate, (e.g., standard deviation,  
9 exact P values, or confidence intervals for treatment effects within individuals); 5) description of  
10 statistical tests examining HTE (i.e., tests evaluating the contrast of treatment effects between  
11 individuals or groups in the study); and 6) claims of HTE. Note that qualitative descriptions of  
12 HTE for item 1 would include any description that implied that treatment effects varied, whereas  
13 item 6 required a more definite study conclusion (e.g., “our results demonstrate significant  
14 variation across individuals in response to treatment X”), whether or not these conclusions were  
15 based on robust statistical tests.  
16  
17  
18  
19  
20  
21  
22  
23  
24  
25  
26  
27  
28  
29  
30  
31  
32

### 33 ***Statistical HTE analysis of extracted study results***

34  
35 We performed statistical analysis testing for person-level HTE on all studies presenting  
36 person-level data. We used a consistent analytic strategy across studies, to the extent permitted  
37 by the reporting in published papers. Our strategy was different for studies that reported person-  
38 level outcome measurements and those that reported estimates of person-level treatment effects  
39 with their sampling variances (or adequate information to approximately calculate these  
40 statistics).  
41  
42  
43  
44  
45  
46  
47  
48

49 For studies that only reported (or allowed the calculation of) *estimates of person-level*  
50 *treatment effects*, we obtained an average effect using a fixed effect inverse variance model and  
51 estimated the variance of the person-level treatment effects using DerSimonian and Laird method  
52  
53  
54  
55  
56  
57  
58  
59  
60

1  
2  
3 of moments estimator.<sup>11;12</sup> In addition to a fixed effect model, we also obtained an average effect  
4 using a random effects model. Finally, we tested the hypothesis that all person-level treatment  
5 effects were equal using Cochran's chi-square test and quantified the proportion of observed  
6 variation due to "true" person-level effect heterogeneity with the  $I^2$  statistic.<sup>13</sup>  
7  
8  
9

10  
11  
12 For studies that reported *person-level outcomes*, we developed a linear model (for  
13 continuous outcomes) or generalized linear model (for binary or count outcomes) using the  
14 outcome of interest as the response, the intervention(s) as a covariate; and indicator variables for  
15 different study participants.<sup>4</sup> This model estimates a common treatment effect across  
16 participants. We also derived a similar model with treatment-by-participant interactions. This  
17 model allows each patient to have a different effect. The statistical significance of person-level  
18 HTE was assessed by a likelihood ratio test comparing the two models. In addition to a fixed  
19 effect model, we also fit a hierarchical linear or generalized linear mixed model with a random  
20 intercept and a random slope (for the treatment effect) to estimate the average treatment effect  
21 across all patients (assuming person-level HTE). We tested the hypothesis that all person-level  
22 treatment effects were equal and quantified the proportion of observed variation due to 'true'  
23 person-level effect heterogeneity with the  $I^2$  statistic.<sup>13</sup> For modeling within-patient variance, we  
24 used a common variance with an uncorrelated covariance structure, as was used in a prior n-of-1  
25 study.<sup>14</sup> Person-level treatment effect was assumed to be equal across time-periods. For the  
26 treatment effect, we used more than one random slope when >2 treatments were compared.  
27  
28  
29  
30  
31  
32  
33  
34  
35  
36  
37  
38  
39  
40  
41  
42  
43  
44  
45  
46  
47  
48

### 49 ***Patient and Public Involvement***

50  
51 Patients and the public were not involved in the design or analysis of this study.  
52  
53  
54  
55  
56  
57  
58  
59  
60

## Results

The searches for repeated crossover studies identified 11,891 citations and those for N-of-1 studies identified 3819 citations (indexed from 2011 onwards). Of these, we retrieved 407 full-text articles for review plus 100 N-of-1 trial articles (indexed before 2011) from an existing systematic review.<sup>5</sup> Upon full-text screening, 62 studies (58 multi-person N-of-1 studies and four repeated period crossover studies) met eligibility criteria (Appendix Table 3) and are reported multi-person N-of-1 studies throughout the article. An outline of the search and study selection flow is provided in **Figure 2**.

### *Description of studies*

**Table 1** summarizes the 62 multi-person N-of-1 studies that were published between 1986 and 2017 reporting a total of 1974 patients. The most common clinical domains in the multi-person N-of-1 studies were neurology (16%), arthritis/rheumatology (10%) and psychiatry (9%). Most studies were described as “double-blind” but details about the methods for blinding were often unclear; similarly studies often provided unclear information about the generation of the randomization sequence and allocation concealment (Appendix Table 4). Among the studies, 93% compared a pair of treatment strategies, 5% compared three strategies, and 2% compared four strategies. Studies had between 3 and 16 treatment periods and obtained an average of 1 to 42 outcome measurements per period. Across reported outcomes, 89% of the assessed outcomes were patient-reported and 11% were investigator-assessed.

### *Reporting Person-level outcomes, effects and HTE*

1  
2  
3 While most studies (92%) had some qualitative acknowledgement that the treatment  
4 effects appeared to vary across individuals, formal reporting at the participant level was variable  
5  
6 (Table 2). Person-level outcomes under each treatment were reported in 52% of multi-person N-  
7  
8 of-1 studies. Person-level treatment effects with quantitative data (comparing outcomes on each  
9  
10 treatment) for each individual who completed the trial was available in 32%; and details on the  
11  
12 statistical evaluation of these effects (as standard deviations or exact P values or confidence  
13  
14 intervals) were available in 13 (21%) multi-person N-of-1 studies. Only five (8%) studies  
15  
16 described statistical tests examining any HTE. However, only two studies (3%) reported person-  
17  
18 level HTE, whereas the others examined group-level HTE using conventional subgroup analysis  
19  
20 based on observable characteristics.  
21  
22  
23  
24  
25  
26  
27

### 28 **Reanalysis of person-level data:**

29  
30 Of the 62 studies, there were 36 studies that provided person-level data, either as  
31  
32 outcomes in each treatment period or as person-level treatment effects (Table 3). Of these, only  
33  
34 25 studies provided person-level data sufficient to support re-analysis: 14 studies provided  
35  
36 person-level outcomes; 13 studies provided person-level treatment effects (two studies provided  
37  
38 both). The remaining 11 studies reported either medians or means without data on variance or  
39  
40 did not provide sufficient information on completers, so they could not be re-analyzed for  
41  
42 treatment effect or HTE.  
43  
44  
45  
46

47 Of 13 studies (with 27 unique comparisons) that reported analyzable person-level  
48  
49 treatment effect data (Table 3), 10 studies had a placebo comparator and three studies had an  
50  
51 active comparator. The sample size ranged from 7 to 68; average crossover periods ranged from  
52  
53  
54  
55  
56  
57  
58  
59  
60

1  
2  
3 6 to 16 days; and average outcome measures per period ranged from 1 to 21. The average  
4  
5 treatment duration ranged from 14 to 336 days.  
6  
7

8         There were 14 studies (with 27 unique comparisons) that reported analyzable person-  
9  
10 level outcome data (**Table 3**), including two studies also reporting person-level treatment effects.  
11  
12 Of these, 11 compared the intervention with placebo and three studies compared two active  
13  
14 interventions. The sample size ranged from 2 to 22; the average number of crossover periods  
15  
16 ranged from 3 to 10; and the average number of outcome measures per period ranged from 1 to  
17  
18 42. The average treatment duration ranged from 9 to 210 days.  
19  
20

### 21 ***Re-analysis of studies reporting estimates of person-level treatment effects***

22  
23  
24         Thirteen studies (including 27 comparisons, due to multiple outcomes in some studies)  
25  
26 reported estimates of person-level treatment effects sufficient to analyze (Appendix Figures 1-16  
27  
28 displays graphs of the person level treatment effect data). Average fixed effect estimates for each  
29  
30 analysis are shown in **Table 4**; random effects estimates were generally similar (Appendix table  
31  
32 5). In 8 of the 13 studies (62%) and 15 of the 27 total unique comparisons (56%) we found  
33  
34 evidence of statistically significant HTE for at least one outcome (Table 4). Generally, the  
35  
36 magnitude in the variation of individual patient effects (as seen in the range) was very large  
37  
38 compared to the average effects. Most studies (64%) showed person-level effects that differed  
39  
40 qualitatively from one another. Most of the variation in the observed individual effects was  
41  
42 attributable to “true” (non-random) heterogeneity of person-level effects; 11 of 27 analyses had  
43  
44  $I^2 > 80\%$ .  
45  
46  
47  
48

### 49 ***Re-analysis of studies reporting person-level outcome measurements***

50  
51         Because some of the 14 studies providing analyzable outcome data had multiple  
52  
53 outcomes (or multiple outcomes scales) there were a total of 27 comparisons with analyzable  
54  
55 data. (Appendix Figures 17-42 displays graphs of the person level outcome results.) Average  
56  
57  
58  
59  
60

1  
2  
3 fixed effect estimates for each analysis are shown in Table 5; random effects estimates were  
4 generally similar (Appendix Table 6). In eight of the 14 studies (57%) (17 of the 27 unique  
5 comparisons [63%]), there was statistically significant person-level HTE for at least one  
6  
7 outcome. Again, the variation in individual effects was often large compared to the average  
8  
9 effect. However, given the lower number of participants per study and periods per participant  
10  
11 and also different analytic approach, estimates of  $I^2$  were much less precise in these studies.  
12  
13  
14  
15  
16  
17  
18

## 19 Discussion

20  
21 This review documents that multi-person N-of-1 studies rarely examine HTE. Only 8%  
22 of 62 multi-person N-of-1 studies described statistical tests examining HTE, but these generally  
23 involved comparisons of treatment effects among groups of patients (e.g., based on age or sex)  
24 rather than across individuals. Only two studies in the whole of the literature tested for person-  
25 level HTE.<sup>15;16</sup> Nevertheless, analyzable person-level results are sometimes reported in multi-  
26 person N-of-1 studies, as outcomes or as treatment effects, suitable for the analysis of person-  
27 level HTE. Our re-analyses of the totality of available data from these studies (n=25) suggested  
28 the presence of substantial non-random variation in treatment effects across individuals in most  
29 studies. This was evident when considering statistical tests for the variation of treatment effects  
30 among patients and also by qualitative assessment of the magnitude of effect variation. This  
31 represents the first broad empirical examination with re-analysis of person-level HTE across  
32 multi-person N-of-1 studies, and it provides some general support for the *a priori* assumption of  
33 individual patient variation in treatment response that broadly motivates personalized medicine.  
34  
35  
36  
37  
38  
39  
40  
41  
42  
43  
44  
45  
46  
47  
48  
49  
50

51 In contrast to parallel-group studies that establish efficacy in a group of patients with a  
52 common condition, N-of-1 studies establish the effects of an intervention in an individual.<sup>17</sup> In  
53  
54  
55  
56  
57  
58  
59  
60



1  
2  
3 this respect, N-of-1 studies can be thought of as adjuncts to clinical care, where the goal is to  
4 select the right treatment for a particular patient, rather than as a research tool, where the goal is  
5 to create new generalizable knowledge.<sup>18,19</sup> Indeed, the results of traditional N-of-1 studies may  
6 be generalizable only to the future treatment response of the patient in the trial, not to other  
7 patients. Nevertheless, using Bayesian meta-analytic techniques, Zucker et al. showed how the  
8 average treatment effect at the population-level can also be estimated by combining multi-person  
9 N-of-1 studies testing similar interventions in similar patients with the same outcome measures.<sup>14</sup>  
10 Similar Bayesian methods have also been suggested for analysis of group-level HTE.<sup>20</sup>

11  
12 Herein, we demonstrate yet a new application of N-of-1 studies, to explore person-level  
13 HTE. This application has important research and clinical implications, even when the  
14 determinants of HTE remain unidentified. It is particularly of interest that there was apparent  
15 variation in the *degree* of person-level HTE found across conditions and treatments. Since the  
16 degree of variation across individuals sets the upper bound for the amount of HTE that might be  
17 explainable by observable characteristics, such as clinical or genomic variables, searching for  
18 subgroup effects in the absence of person-level HTE is a futile exercise.<sup>4,21</sup>

19  
20 An interesting example of how person-level HTE can vary across different conditions  
21 comes from the study of Johannessen et al (**Figure 3**).<sup>15</sup> These investigators conducted N-of-1  
22 patient studies comparing cimetidine to placebo for patients presenting with dyspeptic symptoms  
23 and reported person-level effects by subgroups of disease categories. Among 46 trial completers,  
24 cimetidine had a significant effect for most patients (57%), as it did at the aggregate level.  
25 However, not only was there substantial person-level HTE, but person-level HTE varied across  
26 conditions, being much more pronounced in non-ulcer dyspepsia ( $I^2 = 75\%$ ) compared to peptic  
27  
28  
29  
30  
31  
32  
33  
34  
35  
36  
37  
38  
39  
40  
41  
42  
43  
44  
45  
46  
47  
48  
49  
50  
51  
52  
53  
54  
55  
56  
57  
58  
59  
60

1  
2  
3 ulcer disease ( $I^2 = 35\%$ ) (Figure 3)— despite the very similar overall effects seen in these two  
4  
5 conditions.  
6

7  
8 Finding variation in person-level response in multi-person N-of-1 studies identifies those  
9  
10 conditions for which N-of-1 studies are likely to be clinically relevant. For condition-treatment  
11  
12 combinations shown to have low person-level HTE, single subject studies are highly unlikely to  
13  
14 be clinically informative, and the average results from trials (i.e., “one-size-fits-all” effects) are  
15  
16 more apt to be applicable to individuals.<sup>22;23</sup> On the other hand, N-of-1 studies may be highly  
17  
18 clinically informative for condition-treatments with a high degree of person-level HTE. These  
19  
20 conditions would also be potentially higher yield for examining predictors of HTE (genomic or  
21  
22 otherwise).  
23  
24

25  
26 Our findings also have implications for clinical practice and formulary design. For  
27  
28 conditions marked by high person-level HTE, even when trials show that one treatment is better  
29  
30 on average than others, having a variety of medication options would be useful to optimize  
31  
32 outcomes across all patients, particularly for chronic conditions such as those studied here where  
33  
34 empiric trials of alternative medications to find the best treatment for an individual might be  
35  
36 feasible. For example, the study by March et al. shows that while patients with osteoarthritis on  
37  
38 average had less pain and less stiffness with diclofenac, some patients had improved symptoms  
39  
40 on paracetamol.<sup>24</sup> This person-level heterogeneity of treatment effect may not be detectable in  
41  
42 conventional parallel arm trials employing conventional subgroup analysis.<sup>21</sup>  
43  
44  
45

46  
47 While more studies combining N-of-1 studies are needed to understand the extent of  
48  
49 person-level HTE, future studies need to apply greater methodological rigor to improve the state-  
50  
51 of-the-science on evaluation of individual treatment effects.<sup>25</sup> While the recently published  
52  
53 CONSORT Extension for N-of-1 Trials may help improve reporting, a tabulation of all  
54  
55  
56  
57  
58  
59  
60

1  
2  
3 information (possibly electronically available) appears the most straightforward way to facilitate  
4 the clinical interpretation of these studies.<sup>26</sup> Such reporting allows the inspection of trajectories  
5 over time and may reveal patterns that are not captured by regression models. Complete  
6 reporting would also facilitate the development and evaluation of methods for the analysis of  
7 single subject experiments, particularly its use to better understand the extent and importance of  
8 person-level HTE.  
9

10  
11 The limitations of this review reflect, to a large extent, the limitations of the data in  
12 primary studies. Many conditions are not amenable to the N-of-1 design (e.g. because treatment  
13 effects are cumulative or because outcomes are observed only once). Further, even for  
14 conditions and treatment that are potentially amenable to this design, many important disease  
15 categories lacked published N-of-1 studies. We relied on published studies only and our analytic  
16 cohort may be an underestimation of the true prevalence of these studies—particularly for N-of-  
17 1 studies, which may frequently be conducted without the intention of future publication.  
18  
19

20  
21 In addition, our conclusions regarding the ubiquity of HTE in the data we reanalyzed  
22 should be interpreted in the context of several important limitations. First, there were only a  
23 limited number of available studies that reported data sufficient to analyze, and therefore we  
24 present only a very partial picture of the full scope of inter-individual variation in effects across  
25 clinical conditions. Furthermore, among the studies that did have data, only fairly small numbers  
26 of patients were observed over a small number of treatment periods and we frequently had to rely  
27 on data summaries provided by the authors (e.g., person-level treatment effects and their  
28 sampling variance); these data limitations precluded the use of more complex models, for  
29 example models that account for period effects or other effects of time on the outcome.<sup>3</sup>  
30  
31  
32  
33  
34  
35  
36  
37  
38  
39  
40  
41  
42  
43  
44  
45  
46  
47  
48  
49  
50  
51  
52  
53  
54  
55  
56  
57  
58  
59  
60

1  
2  
3 Our review has demonstrated that HTE remains almost totally unexplored in multi-person  
4  
5 N-of-1 studies, which are uniquely capable of exploring variations in individual (person-level)  
6  
7 treatment effects. Our re-analysis of the data from these studies represents the first systematic  
8  
9 attempt to obtain empirical support for the *a priori* argument that treatment effects vary across  
10  
11 individual patients, an assumption which underpins all efforts to personalize treatment selection.  
12  
13  
14 In this sample, person-level HTE appears to be common and large enough to be clinically  
15  
16 meaningful; the degree of person-level HTE appears to vary across conditions and outcomes.  
17  
18  
19 Thus, multi-person N-of-1 studies are an under-utilized tool to identify where person-level HTE  
20  
21 may be substantial, and where efforts to find molecular or clinical predictors of response  
22  
23 heterogeneity should be focused. In such conditions, parallel arm studies might yield results that  
24  
25 are over-generalized for patient level decision making.  
26  
27  
28  
29  
30  
31  
32  
33  
34  
35  
36  
37  
38  
39  
40  
41  
42  
43  
44  
45  
46  
47  
48  
49  
50  
51  
52  
53  
54  
55  
56  
57  
58  
59  
60

## **Funding Source**

This work was supported by the National Pharmaceutical Council. Additional support was provided by the Patient-Centered Outcomes Research Institute (PCORI) Award (Predictive Analytics Resource Center (SA.Tufts.PARC.OCSO.2018.01.25), and the National Institutes of Health (3UL1TR001079-04S1).

## **Disclosures:**

All statements in this report, including its findings and conclusions, are solely those of the authors and do not necessarily represent the views of the Patient-Centered Outcomes Research Institute (PCORI), its Board of Governors or Methodology Committee.

## **Acknowledgement**

We would like to acknowledge Issa Dahabreh, MD, MS, Assistant Professor of Health Services, Policy and Practice, Assistant Professor of Epidemiology, Brown University, for statistical advice.

We would like to acknowledge Tatum Williamson, MS, Research Assistant, Predictive Analytics and Comparative Effectiveness Center, Institute for Clinical Research and Health Policy Studies, Tufts Medical Center, for assistance with updating literature.

## **Contributorship statement**

DK, GR made substantial contributions to the conception or design of the work; or the acquisition, analysis, or interpretation of data for the work. DK, GR are responsible for drafting the work or revising it critically for important intellectual content. DK, GR, EB, LL, JS, JC, JL,

1  
2  
3 RD, RK have given final approval of the version to be published. DK, GR have made an  
4 agreement to be accountable for all aspects of the work in ensuring that questions related to the  
5 accuracy or integrity of any part of the work are appropriately investigated and resolved.  
6  
7  
8  
9  
10

### 11 **Competing interests**

12  
13  
14 None declared.  
15  
16

### 17 **Data sharing statement**

18  
19 No additional data are available.  
20  
21  
22  
23  
24  
25  
26  
27  
28  
29  
30  
31  
32  
33  
34  
35  
36  
37  
38  
39  
40  
41  
42  
43  
44  
45  
46  
47  
48  
49  
50  
51  
52  
53  
54  
55  
56  
57  
58  
59  
60

## Reference List

- (1) Wallach JD, Sullivan PG, Trepanowski JF, Steyerberg EW, Ioannidis JP. Sex based subgroup differences in randomized controlled trials: empirical evidence from Cochrane meta-analyses. *BMJ* 2016; 355:i5826.
- (2) Hertz DL, McLeod HL. Use of pharmacogenetics for predicting cancer prognosis and treatment exposure, response and toxicity. *J Hum Genet* 2013; 58(6):346-352.
- (3) Kitsios GD, Kent DM. Personalised medicine: not just in our genes. *BMJ* 2012; 344:e2161.
- (4) Senn S. Individual response to treatment: is it a valid assumption? *BMJ* 2004; 329(7472):966-968.
- (5) Kalow W, Tang BK, Endrenyi L. Hypothesis: comparisons of inter- and intra-individual variations can substitute for twin studies in drug research. *Pharmacogenetics* 1998; 8(4):283-289.
- (6) Gabler NB, Duan N, Vohra S, Kravitz RL. N-of-1 trials in the medical literature: a systematic review. *Med Care* 2011; 49(8):761-768.
- (7) Finding What Works in Health Care: Standards for Systematic Reviews. Institute of Medicine (US) Committee on Standards for Systematic Reviews of Comparative Effectiveness Research. 2011.
- (8) Moher D, Liberati A, Tetzlaff J, Altman DG. Preferred reporting items for systematic reviews and meta-analyses: the PRISMA statement. *Ann Intern Med* 2009; 151(4):264-9, W64.
- (9) Methods Guide for Effectiveness and Comparative Effectiveness Review. AHRQ Publication No 10(11)-EHC063-EF Chapters 2011 Available from: URL:<http://effectivehealthcare.ahrq.gov/>
- (10) Higgins JP, Altman DG, Gotzsche PC, Juni P, Moher D, Oxman AD et al. The Cochrane Collaboration's tool for assessing risk of bias in randomised trials. *BMJ* 2011; 343:d5928.
- (11) DerSimonian R, Laird N. Meta-analysis in clinical trials. *Control Clin Trials* 1986; 7(3):177-188.
- (12) Schmidt FL, Oh IS, Hayes TL. Fixed- versus random-effects models in meta-analysis: model properties and an empirical comparison of differences in results. *Br J Math Stat Psychol* 2009; 62(Pt 1):97-128.
- (13) Cochran WG. The combination of estimates from different experiments. *Biometrics* 10, 101-129. 1954.
- (14) Zucker DR, Ruthazer R, Schmid CH. Individual (N-of-1) trials can be combined to give population comparative treatment effect estimates: methodologic considerations. *J Clin Epidemiol* 2010; 63(12):1312-1323.
- (15) Johannessen T, Petersen H, Kristensen P, Fosstvedt D, Kleveland PM, Dybdahl J et al. Cimetidine on-demand in dyspepsia. Experience with randomized controlled single-subject trials. *Scand J Gastroenterol* 1992; 27(3):189-195.

- 1
- 2
- 3
- 4 (16) Pereira JA, Holbrook AM, Dolovich L, Goldsmith C, Thabane L, Douketis JD et al. Are brand-name
- 5 and generic warfarin interchangeable? Multiple n-of-1 randomized, crossover trials. *Annals of*
- 6 *Pharmacotherapy* 2005; 39(7-8):1188-1193.
- 7
- 8 (17) Guyatt GH, Heyting A, Jaeschke R, Keller J, Adachi JD, Roberts RS. N of 1 randomized trials for
- 9 investigating new drugs. *Control Clin Trials* 1990; 11(2):88-100.
- 10
- 11 (18) Guyatt G, Sackett D, Taylor DW, Chong J, Roberts R, Pugsley S. Determining optimal therapy--
- 12 randomized trials in individual patients. *N Engl J Med* 1986; 314(14):889-892.
- 13
- 14 (19) Guyatt G, Sackett D, Adachi J, Roberts R, Chong J, Rosenbloom D et al. A clinician's guide for
- 15 conducting randomized trials in individual patients. *CMAJ* 1988; 139(6):497-503.
- 16
- 17 (20) Henderson NC, Louis TA, Wang C, Varadhan R. Bayesian analysis of heterogeneous treatment
- 18 effects for patient-centered outcomes research. *Health Serv Outcomes Res Methodol* 2016;
- 19 16(4):213-233.
- 20
- 21 (21) Dahabreh IJ, Hayward R, Kent DM. Using group data to treat individuals: understanding
- 22 heterogeneous treatment effects in the age of precision medicine and patient-centred evidence.
- 23 *Int J Epidemiol* 2016.
- 24
- 25 (22) Simon G. Choosing a first-line antidepressant: equal on average does not mean equal for
- 26 everyone. *JAMA* 2001; 286(23):3003-3004.
- 27
- 28 (23) Simon GE, Psaty BM, Hrachovec JB, Mora M. Principles for evidence-based drug formulary
- 29 policy. *J Gen Intern Med* 2005; 20(10):964-968.
- 30
- 31 (24) March L, Irwig L, Schwarz J, Simpson J, Chock C, Brooks P. n of 1 trials comparing a non-steroidal
- 32 anti-inflammatory drug with paracetamol in osteoarthritis. *BMJ* 1045; 309(6961):1041-1045.
- 33
- 34 (25) Kravitz RL, Duan N. eds, and the DEcIDE Methods Center N-of-1 Guidance Panel. Design and
- 35 Implementation of N-of-1 Trials: A User's Guide. AHRQ Publication No. 13(14)-EHC122-EF.
- 36 Rockville, MD: Agency for Healthcare Research and Quality. 2014.
- 37
- 38 (26) Vohra S, Shamseer L, Sampson M, Bukutu C, Schmid CH, Tate R et al. CONSORT extension for
- 39 reporting N-of-1 trials (CENT) 2015 Statement. *BMJ* 2015; 350:h1738.
- 40
- 41
- 42
- 43
- 44
- 45
- 46
- 47
- 48
- 49
- 50
- 51
- 52
- 53
- 54
- 55
- 56
- 57
- 58
- 59
- 60



**Table 1. Evidence Map of Multi-person N-of-1 and Repeated Period Crossover Studies**

| <b>Description</b>                    | <b>Multi-person N-of-1 Studies<br/>(n=62)</b> |
|---------------------------------------|-----------------------------------------------|
| <b>Publication Years</b>              | 1979-2017                                     |
| <b>Subjects</b>                       | <b>Total N (median, IQR)</b>                  |
| Enrolled                              | 2153 (16, 9-42)                               |
| Completed                             | 1705 (12, 7-32)                               |
| <b>Intervention &amp; Comparisons</b> |                                               |
| Head-to-head active drugs             | 10                                            |
| Placebo                               | 47                                            |
| Active drug and placebo               | 1                                             |
| <b>Population</b>                     |                                               |
| Pediatric                             | 12                                            |
| Adults                                | 50                                            |
| <b>Major Systems Studied</b>          |                                               |
| Arthritis/Rheumatology                | 10                                            |
| Cardiovascular                        | 3                                             |
| Gastrointestinal                      | 7                                             |
| Hypertension                          | 1                                             |
| Psychiatry                            | 9                                             |
| Neurology                             | 16                                            |
| Respiratory                           | 9                                             |
| Miscellaneous*                        | 7                                             |
| <b>Top 5 Disease Conditions</b>       |                                               |
| ADHD                                  | 6                                             |
| Angina                                | 3                                             |
| Chronic Pain                          | 5                                             |
| GERD                                  | 5                                             |
| Obstructive Airway                    | 6                                             |
| Osteoarthritis                        | 6                                             |

\*Sleep disorders, Allergy, Cancer, Muscular, Vascular (for multi-person N-of-1); Pain, Urology, GYN, , Heme/Onc, Allergy, Dermatology, Drug abuse, Endocrine, Lipids, Nephrology, Ophthalmology, Respiratory (for Repeated Cross-over Studies). ADHD, Attention-deficit hyperactivity disorder; GERD, Gastroesophageal regurgitation disorder; IQR, Interquartile range; n, number of participants

**Table 2. Survey of HTE Assessment in Multi-person N-of-1 Studies**

| <b>HTE Reporting</b>                                            | <b>Multi-person<br/>N-of-1 Studies<br/>(n=62)</b> |
|-----------------------------------------------------------------|---------------------------------------------------|
| Qualitative description                                         | 92%                                               |
| Person-level outcomes                                           | 52%                                               |
| Person-level treatment effects                                  | 32%                                               |
| Statistical analysis of person-level effects<br>(e.g. p-values) | 21%                                               |
| Any statistical test for HTE                                    | 8%*                                               |
| Claims of heterogeneity                                         | 15%                                               |

\* Only 2 studies reported person-level HTE, the remaining 3 studies reported group level effect.

**Table 3. Characteristics of studies reporting person-level data**

| Author, Year                                                     | Disease                                                     | Number enrolled (analyzed) | Intervention               | Comparator                                   | Cross-over periods | Total intervention duration | Outcome measures per period |
|------------------------------------------------------------------|-------------------------------------------------------------|----------------------------|----------------------------|----------------------------------------------|--------------------|-----------------------------|-----------------------------|
| <i>Studies with re-analyzable person-level outcomes</i>          |                                                             |                            |                            |                                              |                    |                             |                             |
| <b>Camfield, 1996</b>                                            | Mental retardation with fragmented sleep                    | 6 (6)                      | Melatonin                  | Placebo                                      | 7                  | 10 wk                       | 14                          |
| <b>Hinderer, 1990</b>                                            | Traumatic spinal cord injury                                | 5 (5)                      | Baclofen                   | Placebo                                      | 3                  | 9 wk                        | 2                           |
| <b>Langer, 1993</b>                                              | Gastroesophageal reflux                                     | 2 (2)                      | Cisapride                  | Placebo                                      | 3                  | 6 wk                        | 5                           |
| <b>Lashner, 1990</b>                                             | Ulcerative colitis                                          | 7 (6)                      | Nicotine                   | Placebo                                      | 4                  | 8 wk                        | 1                           |
| <b>Maier, 1994</b>                                               | Chronic depression                                          | 10 (9)                     | Sulpiride                  | Placebo                                      | 4                  | 28 wk                       | 42                          |
| <b>Mandelcorn, 2004</b>                                          | Brain injury                                                | 4 (4)                      | Ondansetron                | Placebo                                      | 4                  | 5 wk                        | 1                           |
| <b>McQuay, 1994</b>                                              | Neuropathic pain                                            | 19 (19)                    | Dextromethorphan           | Placebo                                      | 5                  | 20 d                        | 1                           |
| <b>Miyazaki, 1995</b>                                            | Unstable angina                                             | 22 (22)                    | Isosorbide dinitrate       | Isosorbide dinitrate: intermittent injection | 3                  | 9 d                         | 6                           |
| <b>Nathan, 2006</b>                                              | Pediatric brain tumor                                       | 12 (7)                     | Ondansetron & metopimazine | Ondansetron & placebo                        | Unclear            | 189 d                       | unclear                     |
| <b>Parodi, 1979</b>                                              | Unstable angina                                             | 12 (12)                    | Verapamil                  | Placebo                                      | 4                  | 10 d                        | unclear                     |
| <b>Parodi, 1986</b>                                              | Unstable angina                                             | 10 (10)                    | Verapamil                  | Propranolol, placebo                         | 8                  | 18 d                        | unclear                     |
| <b>Tison, 2012</b>                                               | Levodopa-induced dyskinesia in Parkinson's disease patients | 10 (10)                    | Simvastatin                | Placebo                                      | 6                  | 96 d                        | 1                           |
| <i>Studies with re-analyzable person-level treatment effects</i> |                                                             |                            |                            |                                              |                    |                             |                             |
| <b>Emmanuel, 2012</b>                                            | Chronic intestinal pseudo-obstruction                       | 7 (4)                      | Prucalopride               | Placebo                                      | 16                 | 48 wk                       | 21                          |
| <b>Haas, 2004</b>                                                | Chronic tension-type and migraine headache                  | 39 (16)                    | Dextroamphetamine          | Equi-stimulatory caffeine                    | 8                  | 20 d                        | 20                          |
| <b>Jaeschke, 1991</b>                                            | Fibromyalgia                                                | 22 (23)                    | Amitriptyline              | Placebo                                      | 6                  | 12 wk                       | 2                           |
| <b>Johannessen, 1992</b>                                         | Dyspepsia                                                   | 68 (46)                    | Cimetidine                 | Placebo                                      | 12                 | 184 d                       | 15                          |
| <b>Lipka, 2017</b>                                               | Autoimmune myasthenia                                       | 4 (4)                      | Ephedrine                  | Placebo                                      | 4                  | 6 wk                        | 1                           |

|                                                                    |                                              |         |                                                                 |                                          |    |       |         |
|--------------------------------------------------------------------|----------------------------------------------|---------|-----------------------------------------------------------------|------------------------------------------|----|-------|---------|
|                                                                    | gravis                                       |         |                                                                 |                                          |    |       |         |
| <b>Mahon, 1996</b>                                                 | Irreversible chronic airflow limitation      | 16 (14) | Theophylline                                                    | Placebo                                  | 8  | 73 d  | 1       |
| <b>March, 1994</b>                                                 | Osteoarthritis                               | 25 (15) | Diclofenac                                                      | Paracetamol                              | 6  | 12 wk | 14      |
| <b>Patel, 1991</b>                                                 | Nonreversible chronic airflow limitation     | 26 (18) | Ipratropium bromide / theophylline / salbutamol/ beclomethasone | Placebo                                  | 6  | 6 wk  | Unclear |
| <b>Wallace, 1994</b>                                               | Attention deficit hyperactivity disorder     | 11 (7)  | Methylphenidate                                                 | Placebo                                  | 14 | 14 d  | 1       |
| <b>Woodfield, 2005</b>                                             | Skeletal muscle cramps                       | 13      | Quinine                                                         | Placebo                                  | 6  | 14 wk | 2       |
| <b>Zucker, 2006</b>                                                | Fibromyalgia                                 | 58      | Amitriptyline and Placebo                                       | Amitriptyline and fluoxetine combination | 6  | 36 wk | 1       |
| <b><i>Study with both person-level data</i></b>                    |                                              |         |                                                                 |                                          |    |       |         |
| <b>Pereira, 1995</b>                                               | Atrial fibrillation / deep venous thrombosis | 7       | Generic warfarin                                                | Coumadin                                 | 10 | 30 wk | 2       |
| <b>Joy, 2014</b>                                                   | Statin-related myalgia                       | 8 (7)   | Statin                                                          | Placebo                                  | 6  | 33 wk | 3       |
| <b><i>Study with insufficiently reported person-level data</i></b> |                                              |         |                                                                 |                                          |    |       |         |
| <b><i>Person-level outcome data</i></b>                            |                                              |         |                                                                 |                                          |    |       |         |
| <b>Denburg, 1994</b>                                               | Systemic lupus erythematosus                 | 10      | Prednisone                                                      | Placebo                                  | 6  | 30 wk | 1       |
| <b>Mitchel, 2015</b>                                               | Fatigue in advanced cancer                   | 43 (33) | Methylphenidate                                                 | Placebo                                  | 6  | 18 d  | 6       |
| <b>Nikles, 2000</b>                                                | Osteoarthritis                               | 14      | Ibuprofen                                                       | Paracetamol; Placebo                     | 6  | 12 wk | 14      |
| <b>Nikles, 2015</b>                                                | Dry mouth in advanced cancer                 | 17 (4)  | Pilocarpine                                                     | Placebo                                  | 6  | 18 d  | 6       |
| <b>Nikles, 2017</b>                                                | Acquired brain injury                        | 53 (38) | Nervous system stimulants                                       | Placebo                                  | 6  | 18 d  | 6       |
| <b>Reitberg, 2002</b>                                              | Allergic rhinitis                            | 36      | Loratadine and chlorpheniramine maleate                         | loratadine with placebo                  | 8  | 32 d  | 4       |
| <b>Sheather-Reid, 1998</b>                                         | Chronic pain                                 | 8       | Ibuprofen / Codeine                                             | Placebo                                  | 6  | 12 wk | 14      |
| <b>Person-level treatment effects</b>                              |                                              |         |                                                                 |                                          |    |       |         |

|                        |                               |    |               |         |    |       |    |
|------------------------|-------------------------------|----|---------------|---------|----|-------|----|
| <b>Huber, 2007</b>     | Juvenile idiopathic arthritis | 6  | Amitriptyline | Placebo | 6  | 17 wk | 12 |
| <b>Privitera, 1994</b> | Partial seizure               | 16 | Dezinamide    | Placebo | 6  | 35 wk | 6  |
| <b>Wegman, 2003</b>    | Osteoarthritis                | 13 | Paracetamol   | NSAIDs  | 10 | 20 wk | 14 |
| <b>Wegman, 2005</b>    | Regular Temazepam users       | 15 | Temazepam     | Placebo | 10 | 10 wk | 7  |

For peer review only

**Table 4. Analysis results of studies reporting person-level treatment effects**

| Author Year             | Outcome                                                   | Range of the scales (severity)                                | Main Effect                |            | Person-Level Heterogeneity of Treatment Effect |                 |
|-------------------------|-----------------------------------------------------------|---------------------------------------------------------------|----------------------------|------------|------------------------------------------------|-----------------|
|                         |                                                           |                                                               | Treatment effect (CI)      | P for HTE* | Treatment Effect Range                         | I-square % (CI) |
| <b>Emmanuel 2012</b>    | Bloating                                                  | 0-4 (0=absent to 4=worst)                                     | -0.344 (-0.619 to -0.069)  | <0.001     | -1.1 to -0.1                                   | 94 (88 to 97)   |
|                         | Pain                                                      | 0-4 (0=absent to 4=worst)                                     | -0.440 (-0.771 to -0.110)  | <0.001     | -0.2 to -1.4                                   | 96 (92 to 98)   |
| <b>Haas 2004</b>        | Chronic tension-type headache grade                       | 0-3 (0=none to 3=severe)                                      | 0.772 (0.454 to 1.090)     | <0.001     | 0.04 to 1.9                                    | 84 (76 to 90)   |
|                         | Chronic migraine headache grade                           | 0-3 (0=none to 3=severe)                                      | 0.542 (0.354 to 0.731)     | 0.067      | 0.2 to 0.83                                    | 37 (0 to 65)    |
| <b>Jaeschke 1991</b>    | 7-point symptom scale                                     | 1-7 (higher scores represent better function)                 | 0.427 (0.210 to 0.645)     | <0.001     | -1.02 to 3.18                                  | 85 (79 to 89)   |
|                         | Tender point changes count                                | Number of tender points                                       | 1.320 (0.404 to 2.236)     | <0.001     | -4.33 to 9.0                                   | 72 (57 to 82)   |
| <b>Johannessen 1992</b> | 6-point symptom scale                                     | 0-6 (0=NR to 6=NR)                                            | 0.698 (0.466 to 0.931)     | <0.001     | -1.67 to 3.17                                  | 66 (53 to 75)   |
| <b>Joy 2014</b>         | VAS myalgia Score                                         | 0-100mm (0=none to 100=worst)                                 | 0.119 (-2.283 to 2.521)    | 0.996      | -8,10 to 9.45                                  | 0 (0 to 68)     |
|                         | Symptom-specific VAS                                      | 0-100mm (0=none to 100=worst)                                 | 1.937 (0.179 to 3.696)     | 0.797      | -8.0 to 18.05                                  | 0 (0 to 68)     |
|                         | Pain severity score                                       | 0-10 (0=none to 10=worst)                                     | 0.086 (-0.215 to 0.387)    | 0.986      | 0.0 to 1.0                                     | 0 (0 to 68)     |
|                         | Pain interference score                                   | 0-10 (0=none to 10=worst)                                     | -0.016 (-0.095 to 0.064)   | 0.917      | -0.02 to 0.75                                  | 0 (0 to 68)     |
| <b>Lipka 2017</b>       | Quantitative myasthenia gravis score                      | 0-3 (0=none to 3=severe)                                      | 1.006 (0.215 to 1.797)     | 0.803      | 0.67 to 1.67                                   | 0 (0 to 85)     |
|                         | Myasthenia gravis composite                               | 0-50                                                          | 2.891 (0.348 to 5.433)     | 0.177      | -1.05 to 5.12                                  | 39 (0 to 80)    |
|                         | MG-ADL                                                    | 0-24                                                          | 1.099 (-0.277 to 2.474)    | 0.047      | 0.03 to 3.0                                    | 62 (0 to 87)    |
|                         | VAS score                                                 | 0-10 (0=none to 100=worst)                                    | 1.275 (-0.115 to 2.665)    | 0.190      | -0.01 to 3.02                                  | 37 (0 to 78)    |
| <b>Mahon 1996</b>       | Dyspnea in likert Scale                                   | 1-7 (1=extremely short of breath to 7=no shortness)           | 0.125 (-0.181 to 0.430)    | <0.001     | -0.57 to 0.89                                  | 78 (58 to 88)   |
| <b>March 1994</b>       | Mean pain score on VAS                                    | 5 point Likert scale (0-100mm)                                | -7.093 (-11.939 to -2.248) | <0.001     | -33.8 to 4.1                                   | 98 (97 to 98)   |
|                         | Mean stiffness score on VAS                               | 5 point Likert scale (0-100mm)                                | -5.992 (-11.280 to -0.704) | <0.001     | -36 to 10.7                                    | 97 (96 to 98)   |
| <b>Patel 1991**</b>     | 4-item symptom questionnaire (All compared to placebo)    | 1-7 (1=extremely short of breath to 7=no shortness of breath) | 0.340 (0.253 to 0.422)     | <0.001     | -0.34 to 3.1                                   | 91 (87 to 94)   |
|                         | 4-item symptom questionnaire (use of ipratropium bromide) |                                                               | 0.675 (0.264 to 1.085)     | <0.001     | -0.22 to 3.1                                   | 87 (78 to 92)   |
|                         | 4-item symptom questionnaire (use of salbutamol)          |                                                               | 0.865 (0.042 to 1.687)     | <0.001     | 0.46 to 1.3                                    | 94 (NA)         |
|                         | 4-item symptom questionnaire (use of theophylline)        |                                                               | 0.025 (-0.434 to 0.484)    | 0.172      | -0.34 to 0.18                                  | 30 (0 to 93)    |
| <b>Pereira</b>          | INR (diff)                                                | Target INR range of 2.0–3.0                                   | 0.027 (-0.155 to 0.209)    | 0.477      | -0.28 to 0.37                                  | 0 (0 to 75)     |

| 1995                      |                                     |                             |                             |        |               |               |
|---------------------------|-------------------------------------|-----------------------------|-----------------------------|--------|---------------|---------------|
| <b>Wallace<br/>1994</b>   | Conners 15-item rating scale scores | 0-3 (NR)                    | 0.759 (0.341 to 1.178)      | 0.747  | 0.42 to 1.22  | 0 (0 to 79)   |
| <b>Woodfield<br/>2005</b> | Changes in number of cramps         | Number – mean difference    | -18.823 (-28.527 to -9.120) | <0.001 | -77 to -2     | 92 (87 to 95) |
|                           | Total days with cramps              | days                        | -6.181 (-9.798 to -2.563)   | <0.001 | -13 to -1     | 94 (90 to 96) |
| <b>Zucker<br/>2006</b>    | FIQ                                 | 0-100 (0=best to 100=worst) | -5.019 (-8.784 to -1.254)   | 0.999  | -32.0 to 0.98 | 0 (0 to 37)   |

\* The significance of person-level HTE was assessed by Cochran's chi-square-based test

\*\* One subject had beclomethasone

For peer review only

**Table 5. Studies reporting person-level outcomes**

| Author Year            | Outcome                                       | Definition / Range of the Scales (severity)                                                           | Main Effect                | Person-level Heterogeneity of Treatment Effect |                                                          |                 |
|------------------------|-----------------------------------------------|-------------------------------------------------------------------------------------------------------|----------------------------|------------------------------------------------|----------------------------------------------------------|-----------------|
|                        |                                               |                                                                                                       | Fixed Treatment Effect     | P for Person Treatment Interaction*            | Treatment Effect Range Lower Range (CI) Upper Range (CI) | I-square % (CI) |
| <b>Camfield 1996</b>   | Nights without awakening                      | Between 10:00 PM and 7:00 AM per day                                                                  | 0.865 (0.215 to 1.516)     | 0.456                                          | 0.12 to 2.0                                              | 0 (0 to 79)     |
| <b>Hinderer 1990</b>   | Anxiety                                       | Beck Inventory-A anxiety scale 0-3 (0 = never, 3 = almost all the time)                               | 0.000 (0.000 to 0.000)     | <0.001                                         | -6.38 to 0.000                                           | 91 (81 to 95)   |
| <b>Joy 2014</b>        | Myalgia score                                 | Visual Analogue Score for myalgia (0=none to 100=worst)                                               | 3.3812 (-2.668 to 9.430)   | 0.565                                          | -11.66 to 60.79                                          | 0 (0 to 68)     |
| <b>Langer 1993</b>     | Vomiting                                      | Number of episodes                                                                                    | -1.204 (-2.494 to 0.086)   | 0.136                                          | -1.34 to 0.17                                            | 87 (NA)*        |
| <b>Lashner 1990</b>    | Symptom score: abdominal pain                 | Symptom scores 0-100 (0 = best, 100 = worst)                                                          | -3.615 (-16.982 to 9.751)  | 0.007                                          | -35.0 to 15.0                                            | 37 (0 to 73)    |
|                        | Symptom score: bowel movements/day            |                                                                                                       | -0.538 (-1.215 to 0.138)   | 0.001                                          | -3.0 to 1.0                                              | 56.6 (0 to 81)  |
|                        | Symptom score: consistency of bowel movements |                                                                                                       | 7.000 (-7.551 to 21.551)   | 0.013                                          | -25.5 to 33.0                                            | 28 (0 to 69)    |
|                        | Symptom score: hematochezia                   |                                                                                                       | 2.308 (-17.210 to 21.826)  | 0.003                                          | -38.0 to 47.5                                            | 47 (0 to 78)    |
|                        | Symptom score: general sense of well-being    |                                                                                                       | -6.538 (-25.352 to 12.275) | 0.008                                          | -43.0 to 35.0                                            | 35 (0 to 73)    |
| <b>Maier 1994</b>      | SCL-90 subscales: Depressed mood              | Self-rating inventory to measure the effects of drug                                                  | -3.536 (-6.718 to -0.354)  | <0.001                                         | -17.8 to 2.74                                            | 58 (12 to 80)   |
|                        | SCL-90 subscales: Anxiety                     |                                                                                                       | -3.753 (-6.582 to -0.924)  | <0.001                                         | -17.4 to 2.5                                             | 66 (30 to 83)   |
|                        | SCL-90 subscales: Somatization                |                                                                                                       | -1.419 (-4.316 to 1.478)   | 0.869                                          | -6.0 to 2.7                                              | 0 (0 to 65)     |
| <b>Mandelcorn 2004</b> | Self-Assessment score                         | 0–5 (0 = worst, 5 = best)                                                                             | -2.052 (-8.865 to 4.761)   | 0.05                                           | -7.7 to 4.9                                              | 0 (0 to 85)     |
|                        | Lower extremity ataxia                        | Fugl-Meyer: 3-point (0 cannot be performed to 2 can be fully performed)                               | 12.494 (-3.155 to 28.142)  | 0.025                                          | -6.42 to 36.76                                           | 35 (0 to 77)    |
|                        | Truncal ataxia                                | AMTI forceplate®: NR<br>Berg Balance Scale® 0–56, with a higher score indicating a better performance | 1.196 (-2.866 to 5.257)    | 0.690                                          | -0.52 to 2.20                                            | 0 (0 to 85)     |
|                        | Upper extremity ataxia                        | Purdue Pegboard Test®: pegs inserted into the board with each hand in 30 sec                          | -0.498 (-3.546 to 2.550)   | 0.382                                          | -3.68 to 1.42                                            | 0 (0 to 85)     |



| Author Year          | Outcome                                        | Definition / Range of the Scales (severity)                                                         | Main Effect               |                                     | Person-level Heterogeneity of Treatment Effect           |                 |
|----------------------|------------------------------------------------|-----------------------------------------------------------------------------------------------------|---------------------------|-------------------------------------|----------------------------------------------------------|-----------------|
|                      |                                                |                                                                                                     | Fixed Treatment Effect    | P for Person Treatment Interaction* | Treatment Effect Range Lower Range (CI) Upper Range (CI) | I-square % (CI) |
|                      |                                                | <i>Minnesota Placing Test®: reach out, grasp, and place blocks in a specific order</i>              |                           |                                     |                                                          |                 |
| <b>McQuay 1994</b>   | VAS Pain Intensity                             | 0-100 (0 = no pain, 100 = worst possible pain)                                                      | -1.094 (-5.572 to 3.383)  | 0.004                               | -8.0 to 10.1                                             | 0 (0 to 49)     |
|                      | VAS Relief Intensity                           | 0-100 (0 = no relief, 100 = complete pain relief)                                                   | -3.913 (-11.729 to 3.903) | 0.038                               | -28.4 to 5.15                                            | 0 (0 to 49)     |
| <b>Miyazaki 1995</b> | Incidence of angina                            | Either ST-segment elevation or depression at rest                                                   | 0.496 (-0.206 to 1.199)   | 0.125                               | -16.19 to 17.11                                          | 0 (0 to 60)     |
| <b>Nathan 2006</b>   | Emetic episodes per day                        | complete response (0 episodes/day), major response (1–2 episodes/day), or failure (>2 episodes/day) | -0.095 (-0.514 to 0.325)  | 0.001                               | -16.5 to 2.08                                            | 59 (6 to 82)    |
| <b>Parodi 1979</b>   | Ischemic attacks                               | ST elevation or depression (details NR)                                                             | -1.544 (-1.838 to -1.251) | 0.007                               | -16.21 to -0.34                                          | 48 (0 to 73)    |
| <b>Parodi 1986</b>   | Asymptomatic ST elevation (After verapamil)    | 0.1 mV of ST-segment elevation measured 20 ms after the J point                                     | -1.637 (-1.994 to -1.279) | 0.110                               | -2.37 to -1.30                                           | 6 (0 to 65)     |
|                      | Asymptomatic ST depression (After verapamil)   | More than 0.2 mV of ST-segment depression measured 80 ms after the J point                          | -1.083 (-1.903 to -0.262) | 0.401                               | -17.42 to -0.90                                          | 0 (0 to 62)     |
|                      | Symptomatic ST elevation (After verapamil)     |                                                                                                     | -1.580 (-1.906 to -1.254) | <0.001                              | -15.40 to -1.45                                          | 0 (0 to 62)     |
|                      | Symptomatic ST Depression (After verapamil)    |                                                                                                     | -0.990 (-1.411 to -0.569) | 0.002                               | -2.53 to -0.52                                           | 6 (0 to 64)     |
|                      | Asymptomatic ST elevation (After propranolol)  |                                                                                                     | 0.100 (-0.086 to 0.286)   | 0.006                               | -0.77 to 1.38                                            | 62 (25 to 81)   |
|                      | Asymptomatic ST depression (After propranolol) |                                                                                                     | 0.339 (-0.168 to 0.845)   | 0.964                               | -18.3 to 0.83                                            | 0 (0 to 62)     |
|                      | Symptomatic ST elevation (After propranolol)   |                                                                                                     | -0.002 (-0.177 to 0.173)  | 0.063                               | -14.9 to 0.68                                            | 46 (0 to 74)    |
|                      | Symptomatic ST Depression (After propranolol)  |                                                                                                     | -0.374 (-0.709 to -0.039) | 0.023                               | -17.1 to -0.73                                           | 4 (0 to 64)     |
| <b>Pereira 1995</b>  | INR                                            | Target INR range of 2.0–3.0                                                                         | -0.126 (-0.312 to 0.060)  | 0.433                               | -0.42 to 0.16                                            | 0 (0 to 71)     |
| <b>Tison 2012</b>    | Troublesome dyskinesia                         | 7 points scale (1 = extremely uncomfortable, 7 = not at all uncomfortable)                          | 0.167 (-0.449 to 0.783)   | 0.593                               | -0.67 to 1.83                                            | 0 (0 to 62)     |

\* The significance of person-level HTE was assessed by a likelihood ratio test comparing the two models – model with common treatment effect and model with treatment-by-participant interactions

## Figure Legend

**Figure 1:** The Figure provides a schematic description of: person-level outcomes (outcomes for each patient during each treatment period); person-level effects (contrasts of the outcomes for each patient in one treatment condition *versus* another); and person-HTE (between patient contrasts of effects).

**Figure 2.** Study Flow Diagram represents the flow of eligible studies included in this review

**Figure 3.** Person-level variation across different disease conditions. This figure depicts the results of 46 different N-of-1 trials of cimetidine as reported by Johannesssen et al <sup>12</sup>. The effect of cimetidine versus placebo was measured in each subject across 12 cross-over periods over the span of 184 days. While cimetidine had a similar average effect regardless of the index condition, there was far greater consistency of effect in patients with peptic ulcer disease and much more variation in effect among patients with non-ulcer dyspepsia.

1  
2  
3  
4  
5  
6  
7  
8  
9  
10  
11  
12  
13  
14  
15  
16  
17  
18  
19  
20  
21  
22  
23  
24  
25  
26  
27  
28  
29  
30  
31  
32  
33  
34  
35  
36  
37  
38  
39  
40  
41  
42  
43  
44  
45  
46  
47  
48  
49  
50  
51  
52  
53  
54  
55  
56  
57  
58  
59  
60

For peer review only

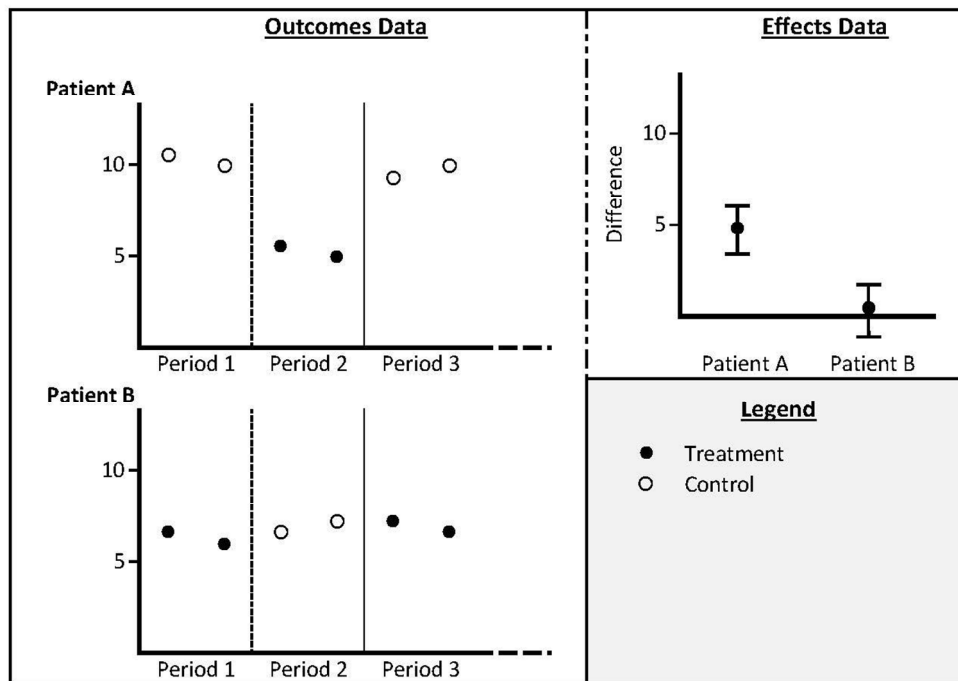

Figure 1: The Figure provides a schematic description of: person-level outcomes (outcomes for each patient during each treatment period); person-level effects (contrasts of the outcomes for each patient in one treatment condition versus another); and person-HTE (between patient contrasts of effects).

111x79mm (300 x 300 DPI)

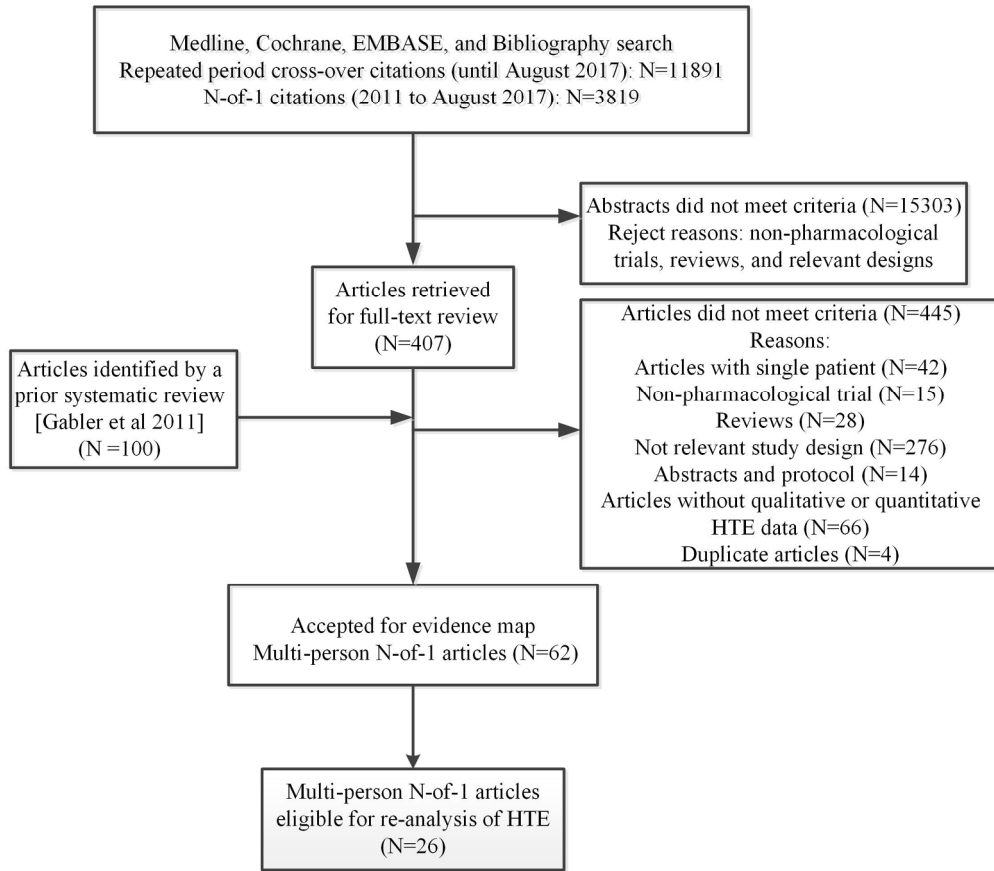

Figure 2. Study Flow Diagram represents the flow of eligible studies included in this review

189x164mm (300 x 300 DPI)

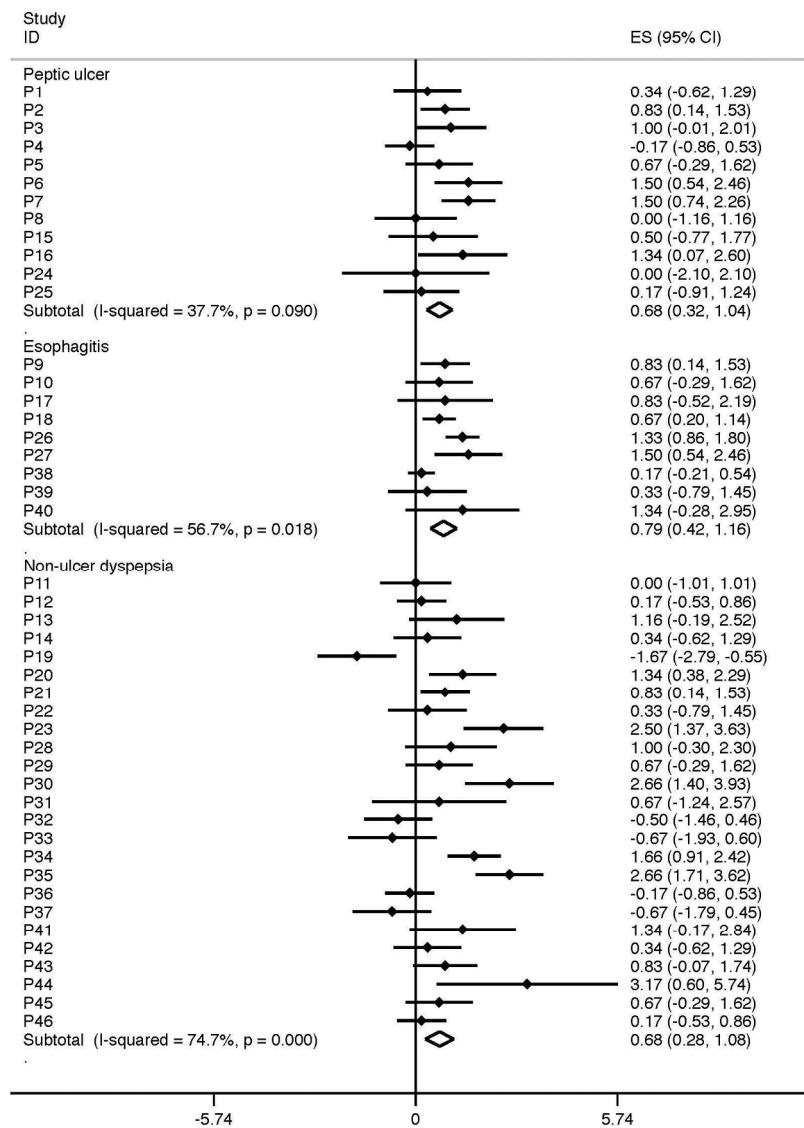

Figure 3. Person-level variation across different disease conditions. This figure depicts the results of 46 different N-of-1 trials of cimetidine as reported by Johannessen et al 12. The effect of cimetidine versus placebo was measured in each subject across 12 cross-over periods over the span of 184 days. While cimetidine had a similar average effect regardless of the index condition, there was far greater consistency of effect in patients with peptic ulcer disease and much more variation in effect among patients with non-ulcer dyspepsia.

150x203mm (300 x 300 DPI)

## Appendix Materials

**Appendix Table 1: N-of-1 Trial Searches**

|     |                                                                                        |
|-----|----------------------------------------------------------------------------------------|
| 1.  | randomized controlled trial.pt.                                                        |
| 2.  | controlled clinical trial.pt.                                                          |
| 3.  | randomized controlled trials/                                                          |
| 4.  | Double-blind Method/                                                                   |
| 5.  | Single-Blind Method/                                                                   |
| 6.  | clinical trial.pt.                                                                     |
| 7.  | Clinical Trials.mp. or exp Clinical Trials/                                            |
| 8.  | random\$.tw.                                                                           |
| 9.  | trial\$.tw.                                                                            |
| 10. | Cross-Over Studies/                                                                    |
| 11. | or/1-10                                                                                |
| 12. | n-of-1.af.                                                                             |
| 13. | 11 and 12                                                                              |
| 14. | (single-subject or single-patient or single case or single-case or within-patient).af. |
| 15. | ((single adj1 patient) or (single adj1 subject)).tw.                                   |
| 16. | 14 or 15                                                                               |
| 17. | 12 and 16                                                                              |
| 18. | multi-crossover.mp.                                                                    |
| 19. | 12 and 18                                                                              |
| 20. | 13 or 17 or 19                                                                         |
| 21. | limit 19 to yr="2010 - 2017"                                                           |

**Appendix Table 2: Repeated Period Crossover Trials**

|     |                                                                |
|-----|----------------------------------------------------------------|
| 1.  | (repeat\$ or rotat\$).af.                                      |
| 2.  | ((three or four or five or six) and period).tw.                |
| 3.  | (multi- or multiple).tw.                                       |
| 4.  | (three-period or four-period or five-period or six-period).tw. |
| 5.  | (three-way or four-way or five-way or six-way).tw.             |
| 6.  | or/1-5                                                         |
| 7.  | Cross-Over Studies/ or (cross-over or crossover).af.           |
| 8.  | 6 and 7                                                        |
| 9.  | randomized controlled trial.pt.                                |
| 10. | controlled clinical trial.pt.                                  |
| 11. | randomized controlled trials/                                  |
| 12. | Double-blind Method/                                           |
| 13. | Single-Blind Method/                                           |
| 14. | clinical trial.pt.                                             |
| 15. | Clinical Trials.mp. or exp Clinical Trials/                    |
| 16. | random\$.tw.                                                   |
| 17. | trial\$.tw.                                                    |
| 18. | or/9-17                                                        |
| 19. | 8 and 18                                                       |
| 20. | (dt or de or tu).fs.                                           |
| 21. | 19 and 20                                                      |
| 22. | 7 and 20                                                       |
| 23. | “Reproducibility of Results”/                                  |
| 24. | 16 and 22                                                      |
| 25. | limit 22 to english language                                   |
| 26. | 9 or 10 or 11 or 14 or 15 or 16                                |
| 27. | 7 or 23                                                        |
| 28. | 20 and 26 and 27                                               |
| 29. | random.af.                                                     |
| 30. | 9 or 10 or 11 or 14 or 15 or 29                                |
| 31. | ae.fs.                                                         |
| 32. | 20 or 31                                                       |
| 33. | 27 and 30 and 32                                               |
| 34. | limit 33 to (english language and humans)                      |
| 35. | periods.af.                                                    |



|     |                     |
|-----|---------------------|
| 36. | 6 or 35             |
| 37. | 33 and 36           |
| 38. | Animals/ not human/ |
| 39. | 37 not 38           |

For peer review only

**Appendix Table 3: Reference List of Included Studies**

|     |                                                                                                                                                                                                                                                                                                                                                                                         |
|-----|-----------------------------------------------------------------------------------------------------------------------------------------------------------------------------------------------------------------------------------------------------------------------------------------------------------------------------------------------------------------------------------------|
| 1.  | Nikles CJ, McKinlay L, Mitchell GK, Carmont SA, Senior HE, Waugh MC et al. Aggregated n-of-1 trials of central nervous system stimulants versus placebo for paediatric traumatic brain injury--a pilot study. <i>Trials [Electronic Resource]</i> 2014; 15:54.                                                                                                                          |
| 2.  | Tison F, Negre-Pages L, Meissner WG, Dupouy S, Li Q, Thiolat ML et al. Simvastatin decreases levodopa-induced dyskinesia in monkeys, but not in a randomized, placebo-controlled, multiple cross-over ("n-of-1") exploratory trial of simvastatin against levodopa-induced dyskinesia in Parkinson's disease patients. <i>Parkinsonism &amp; Related Disorders</i> 2013; 19(4):416-421. |
| 3.  | Rascol O, Ferreira J, Negre-Pages L, Perez-Lloret S, Lacomblez L, Galitzky M et al. A proof-of-concept, randomized, placebo-controlled, multiple cross-overs (n-of-1) study of naftazone in Parkinson's disease. <i>Fundamental &amp; Clinical Pharmacology</i> 2012; 26(4):557-564.                                                                                                    |
| 4.  | Emmanuel AV, Kamm MA, Roy AJ, Kerstens R, Vandeplassche L. Randomised clinical trial: the efficacy of prucalopride in patients with chronic intestinal pseudo-obstruction--a double-blind, placebo-controlled, cross-over, multiple n = 1 study. <i>Alimentary Pharmacology &amp; Therapeutics</i> 2012; 35(1):48-55.                                                                   |
| 5.  | Yelland MJ, Poulos CJ, Pillans PI, Bashford GM, Nikles CJ, Sturtevant JM et al. N-of-1 randomized trials to assess the efficacy of gabapentin for chronic neuropathic pain. <i>Pain Medicine</i> 2009; 10(4):754-761.                                                                                                                                                                   |
| 6.  | Nonoyama ML, Brooks D, Guyatt GH, Goldstein RS. Effect of oxygen on health quality of life in patients with chronic obstructive pulmonary disease with transient exertional hypoxemia. <i>American Journal of Respiratory &amp; Critical Care Medicine</i> 2007; 176(4):343-349.                                                                                                        |
| 7.  | Huber AM, Tomlinson GA, Koren G, Feldman BM. Amitriptyline to relieve pain in juvenile idiopathic arthritis: a pilot study using Bayesian metaanalysis of multiple N-of-1 clinical trials. <i>Journal of Rheumatology</i> 2007; 34(5):1125-1132.                                                                                                                                        |
| 8.  | Yelland MJ, Nikles CJ, McNair N, Del Mar CB, Schluter PJ, Brown RM. Celecoxib compared with sustained-release paracetamol for osteoarthritis: a series of n-of-1 trials. <i>Rheumatology</i> 2007; 46(1):135-140.                                                                                                                                                                       |
| 9.  | Zucker DR, Ruthazer R, Schmid CH, Feuer JM, Fischer PA, Kieval RI et al. Lessons learned combining N-of-1 trials to assess fibromyalgia therapies. <i>Journal of Rheumatology</i> 2006; 33(10):2069-2077.                                                                                                                                                                               |
| 10. | Nikles CJ, Mitchell GK, Del Mar CB, Clavarino A, McNair N. An n-of-1 trial service in clinical practice: testing the effectiveness of stimulants for attention-deficit/hyperactivity disorder. <i>Pediatrics</i> 2006; 117(6):2040-2046.                                                                                                                                                |
| 11. | Nathan PC, Tomlinson G, Dupuis LL, Greenberg ML, Ota S, Bartels U et al. A pilot study of ondansetron plus metopimazine vs. ondansetron monotherapy in children receiving highly emetogenic chemotherapy: a Bayesian randomized serial N-of-1 trials design. <i>Supportive Care in Cancer</i> 2006; 14(3):268-276.                                                                      |
| 12. | Pereira JA, Holbrook AM, Dolovich L, Goldsmith C, Thabane L, Douketis JD et al. Are brand-name and generic warfarin interchangeable? Multiple n-of-1 randomized, crossover trials. <i>Annals of Pharmacotherapy</i> 2005; 39(7-8):1188-1193.                                                                                                                                            |
| 13. | Woodfield R, Goodyear-Smith F, Arroll B. N-of-1 trials of quinine efficacy in skeletal muscle cramps of the leg. <i>British Journal of General Practice</i> 2005; 55(512):181-185.                                                                                                                                                                                                      |
| 14. | Wegman AC, van der Windt DA, Bongers M, Twisk JW, Stalman WA, de Vries TP. Efficacy of temazepam in frequent users: a series of N-of-1 trials. <i>Family Practice</i> 2005; 22(2):152-159.                                                                                                                                                                                              |
| 15. | Nikles CJ, Yelland M, Glasziou PP, Del MC. Do individualized medication effectiveness tests (n-of-1 trials) change clinical decisions about which drugs to use for osteoarthritis and chronic pain?. [Review] [19 refs]. <i>American Journal of Therapeutics</i> 2005; 12(1):92-97.                                                                                                     |
| 16. | Smith BJ, Appleton SL, Veale AJ, McElroy HJ, Veljkovic D, Saccoia L. Eformoterol n-of-1 trials in chronic obstructive pulmonary disease poorly reversible to salbutamol. <i>Chronic Respiratory Disease</i> 2004; 1(2):63-69.                                                                                                                                                           |

|     |                                                                                                                                                                                                                                                                 |
|-----|-----------------------------------------------------------------------------------------------------------------------------------------------------------------------------------------------------------------------------------------------------------------|
| 17. | Haas DC, Sheehe PR. Dextroamphetamine pilot crossover trials and n of 1 trials in patients with chronic tension-type and migraine headache. <i>Headache</i> 2004; 44(10):1029-1037.                                                                             |
| 18. | Mandelcorn J, Cullen NK, Bayley MT. A preliminary study of the efficacy of ondansetron in the treatment of ataxia, poor balance and incoordination from brain injury. <i>Brain Injury</i> 2004; 18(10):1025-1039.                                               |
| 19. | Pope JE, Prashker M, Anderson J. The efficacy and cost effectiveness of N of 1 studies with diclofenac compared to standard treatment with nonsteroidal antiinflammatory drugs in osteoarthritis. <i>Journal of Rheumatology</i> 2004; 31(1):140-149.           |
| 20. | Wegman AC, van der Windt DA, de HM, Deville WL, Fo CT, de Vries TP. Switching from NSAIDs to paracetamol: a series of n of 1 trials for individual patients with osteoarthritis. <i>Annals of the Rheumatic Diseases</i> 2003; 62(12):1156-1161.                |
| 21. | Reitberg DP, Del RE, Weiss SL, Rebell G, Zaias N. Single-patient drug trial methodology for allergic rhinitis. <i>Annals of Pharmacotherapy</i> 2002; 36(9):1366-1374.                                                                                          |
| 22. | Linday LA, Tsiouris JA, Cohen IL, Shindlecker R, DeCresce R. Famotidine treatment of children with autistic spectrum disorders: pilot research using single subject research design. <i>Journal of Neural Transmission</i> 2001; 108(5):593-611.                |
| 23. | Duggan CM, Mitchell G, Nikles CJ, Glasziou PP, Del Mar CB, Clavarino A. Managing ADHD in general practice. N of 1 trials can help! <i>Australian Family Physician</i> 2000; 29(12):1205-1209.                                                                   |
| 24. | Nikles CJ, Glasziou PP, Del Mar CB, Duggan CM, Clavarino A, Yelland MJ. Preliminary experiences with a single-patient trials service in general practice. <i>Medical Journal of Australia</i> 2000; 173(2):100-103.                                             |
| 25. | Mahon JL, Laupacis A, Hodder RV, McKim DA, Paterson NA, Wood TE et al. Theophylline for irreversible chronic airflow limitation: a randomized study comparing n of 1 trials to standard practice. <i>Chest</i> 1999; 115(1):38-48.                              |
| 26. | Bollert FG, Paton JY, Marshall TG, Calvert J, Greening AP, Innes JA. Recombinant DNase in cystic fibrosis: a protocol for targeted introduction through n-of-1 trials. <i>Scottish Cystic Fibrosis Group. European Respiratory Journal</i> 1999; 13(1):107-113. |
| 27. | Kent MA, Camfield CS, Camfield PR. Double-blind methylphenidate trials: practical, useful, and highly endorsed by families. <i>Archives of Pediatrics &amp; Adolescent Medicine</i> 1999; 153(12):1292-1296.                                                    |
| 28. | Webb S, Tansey P, Brown H, Jackson A, Bilton D. Placebo-controlled n-of-1 trials in cystic fibrosis. <i>European Respiratory Journal</i> 1999; 14(4):993.                                                                                                       |
| 29. | Haines DR, Gaines SP. N of 1 randomised controlled trials of oral ketamine in patients with chronic pain. <i>Pain</i> 1999; 83(2):283-287.                                                                                                                      |
| 30. | Sheather-Reid RB, Cohen M. Efficacy of analgesics in chronic pain: a series of N-of-1 studies. <i>Journal of Pain &amp; Symptom Management</i> 1998; 15(4):244-252.                                                                                             |
| 31. | Camfield P, Gordon K, Dooley J, Camfield C. Melatonin appears ineffective in children with intellectual deficits and fragmented sleep: six "N of 1" trials. <i>Journal of Child Neurology</i> 1996; 11(4):341-343.                                              |
| 32. | Mahon J, Laupacis A, Donner A, Wood T. Randomised study of n of 1 trials versus standard practice.[Erratum appears in <i>BMJ</i> 1996 Jun 1;312(7043):1392]. <i>BMJ</i> 1996; 312(7038):1069-1074.                                                              |
| 33. | Maier W, Benkert O. Treatment of chronic depression with sulpiride: evidence of efficacy in placebo-controlled single case studies. <i>Psychopharmacology</i> 1994; 115(4):495-501.                                                                             |
| 34. | McQuay HJ, Carroll D, Jadad AR, Glynn CJ, Jack T, Moore RA et al. Dextromethorphan for the treatment of neuropathic pain: a double-blind randomised controlled crossover trial with integral n-of-1 design. <i>Pain</i> 1994; 59(1):127-133.                    |
| 35. | March L, Irwig L, Schwarz J, Simpson J, Chock C, Brooks P. n of 1 trials comparing a non-steroidal anti-inflammatory drug with paracetamol in osteoarthritis. <i>BMJ</i> 1994; 309(6961):1041-1045.                                                             |
| 36. | Denburg SD, Carbotte RM, Denburg JA. Corticosteroids and neuropsychological functioning in                                                                                                                                                                      |

|     |                                                                                                                                                                                                                                                                                                             |
|-----|-------------------------------------------------------------------------------------------------------------------------------------------------------------------------------------------------------------------------------------------------------------------------------------------------------------|
|     | patients with systemic lupus erythematosus. <i>Arthritis &amp; Rheumatism</i> 1994; 37(9):1311-1320.                                                                                                                                                                                                        |
| 37. | Privitera MD, Treiman DM, Pledger GW, Sahlroot JT, Handforth A, Linde MS et al. Dezinamide for partial seizures: results of an n-of-1 design trial. <i>Neurology</i> 1994; 44(8):1453-1458.                                                                                                                 |
| 38. | Langer JC, Winthrop AL, Issenman RM. The single-subject randomized trial. A useful clinical tool for assessing therapeutic efficacy in pediatric practice. <i>Clinical Pediatrics</i> 1993; 32(11):654-657.                                                                                                 |
| 39. | Molloy DW, Guyatt GH, Standish T, Willan A, McIlroy W, D'Souza J et al. Effect of a new nootropic agent, CGS 5649B, on cognition, function, and behavior in dementia. <i>Journal of General Internal Medicine</i> 1993; 8(8):444-447.                                                                       |
| 40. | Johannessen T, Petersen H, Kristensen P, Fosstvedt D, Kleveland PM, Dybdahl J et al. Cimetidine on-demand in dyspepsia. Experience with randomized controlled single-subject trials. <i>Scandinavian Journal of Gastroenterology</i> 1992; 27(3):189-195.                                                   |
| 41. | Johannessen T, Kristensen P, Petersen H, Fosstvedt D, Loge I, Kleveland PM et al. The symptomatic effect of 1-day treatment periods with cimetidine in dyspepsia. Combined results from randomized, controlled, single-subject trials. <i>Scandinavian Journal of Gastroenterology</i> 1991; 26(9):974-980. |
| 42. | Patel A, Jaeschke R, Guyatt GH, Keller JL, Newhouse MT. Clinical usefulness of n-of-1 randomized controlled trials in patients with nonreversible chronic airflow limitation. <i>American Review of Respiratory Disease</i> 1991; 144(4):962-964.                                                           |
| 43. | Larsen S, Farup P, Flaten O, Osnes M. The multi-crossover model for classifying patients as responders to a given treatment. <i>Scandinavian Journal of Gastroenterology</i> 1991; 26(7):763-770.                                                                                                           |
| 44. | Jaeschke R, Adachi J, Guyatt G, Keller J, Wong B. Clinical usefulness of amitriptyline in fibromyalgia: the results of 23 N-of-1 randomized controlled trials. <i>Journal of Rheumatology</i> 1991; 18(3):447-451.                                                                                          |
| 45. | Hinderer SR. The supraspinal anxiolytic effect of baclofen for spasticity reduction. <i>American Journal of Physical Medicine &amp; Rehabilitation</i> 1990; 69(5):254-258.                                                                                                                                 |
| 46. | Lashner BA, Hanauer SB, Silverstein MD. Testing nicotine gum for ulcerative colitis patients. Experience with single-patient trials. <i>Digestive Diseases &amp; Sciences</i> 1990; 35(7):827-832.                                                                                                          |
| 47. | McBride MC. An individual double-blind crossover trial for assessing methylphenidate response in children with attention deficit disorder. <i>Journal of Pediatrics</i> 1988; 113(1:Pt 1):t-45.                                                                                                             |
| 48. | Menard J, Serrurier D, Bautier P, Plouin PF, Corvol P. Crossover design to test antihypertensive drugs with self-recorded blood pressure. <i>Hypertension</i> 1988; 11(2):153-159.                                                                                                                          |
| 49. | Ullmann RK, Sleator EK. Responders, nonresponders, and placebo responders among children with attention deficit disorder. Importance of a blinded placebo evaluation. <i>Clinical Pediatrics</i> 1986; 25(12):594-599.                                                                                      |
| 50. | Wolfe B, Del RE, Weiss SL, Mendelson A, Elbaga TA, Huser FJ et al. Validation of a single-patient drug trial methodology for personalized management of gastroesophageal reflux disease. <i>J Manag Care Pharm</i> 2002; 8(6):459-468.                                                                      |
| 51. | Brookes ST, Biddle L, Paterson C, Woolhead G, Dieppe P. "Me's me and you's you": Exploring patients' perspectives of single patient (n-of-1) trials in the UK. <i>Trials</i> 2007; 8:10.                                                                                                                    |
| 52. | Wallace AE, Kofoed LL. Statistical Analysis of Single Case Studies in the Clinical Setting: The Example of Methylphenidate Trials in Children with Attention-Deficit Hyperactivity Disorder. <i>Journal of Child and Adolescent Psychopharmacology</i> 1994; 4(3):141-150.                                  |
| 53. | Miyazaki S, Nonogi H, Goto Y, Sumiyoshi T, Haze K, Hiramori K. Comparison of the therapeutic efficacy of continuous and intermittent injection of isosorbide dinitrate: a randomized study on unstable angina. <i>Internal Medicine</i> 1995; 34(9):856-862.                                                |
| 54. | Parodi O, Maseri A, Simonetti I. Management of unstable angina at rest by verapamil. A double-blind cross-over study in coronary care unit. <i>British Heart Journal</i> 1979; 41(2):167-174.                                                                                                               |
| 55. | Parodi O, Simonetti I, Michelassi C, Carpeggiani C, Biagini A, L'Abbate A et al. Comparison of verapamil and propranolol therapy for angina pectoris at rest: a randomized, multiple-crossover, controlled trial in the coronary care unit. <i>American Journal of Cardiology</i> 1986; 57(11):899-906.     |

|     |  |
|-----|--|
| 1   |  |
| 2   |  |
| 3   |  |
| 4   |  |
| 5   |  |
| 6   |  |
| 7   |  |
| 8   |  |
| 9   |  |
| 10  |  |
| 11  |  |
| 12  |  |
| 13  |  |
| 14  |  |
| 15  |  |
| 16  |  |
| 17  |  |
| 18  |  |
| 19  |  |
| 20  |  |
| 21  |  |
| 22  |  |
| 23  |  |
| 24  |  |
| 25  |  |
| 26  |  |
| 27  |  |
| 28  |  |
| 29  |  |
| 30  |  |
| 31  |  |
| 32  |  |
| 33  |  |
| 34  |  |
| 35  |  |
| 36  |  |
| 37  |  |
| 38  |  |
| 39  |  |
| 40  |  |
| 41  |  |
| 42  |  |
| 43  |  |
| 44  |  |
| 45  |  |
| 46  |  |
| 47  |  |
| 48  |  |
| 49  |  |
| 50  |  |
| 51  |  |
| 52  |  |
| 53  |  |
| 54  |  |
| 55  |  |
| 56  |  |
| 57  |  |
| 58  |  |
| 59  |  |
| 60  |  |
| 61  |  |
| 62  |  |
| 63  |  |
| 64  |  |
| 65  |  |
| 66  |  |
| 67  |  |
| 68  |  |
| 69  |  |
| 70  |  |
| 71  |  |
| 72  |  |
| 73  |  |
| 74  |  |
| 75  |  |
| 76  |  |
| 77  |  |
| 78  |  |
| 79  |  |
| 80  |  |
| 81  |  |
| 82  |  |
| 83  |  |
| 84  |  |
| 85  |  |
| 86  |  |
| 87  |  |
| 88  |  |
| 89  |  |
| 90  |  |
| 91  |  |
| 92  |  |
| 93  |  |
| 94  |  |
| 95  |  |
| 96  |  |
| 97  |  |
| 98  |  |
| 99  |  |
| 100 |  |
| 101 |  |
| 102 |  |
| 103 |  |
| 104 |  |
| 105 |  |
| 106 |  |
| 107 |  |
| 108 |  |
| 109 |  |
| 110 |  |
| 111 |  |
| 112 |  |
| 113 |  |
| 114 |  |
| 115 |  |
| 116 |  |
| 117 |  |
| 118 |  |
| 119 |  |
| 120 |  |
| 121 |  |
| 122 |  |
| 123 |  |
| 124 |  |
| 125 |  |
| 126 |  |
| 127 |  |
| 128 |  |
| 129 |  |
| 130 |  |
| 131 |  |
| 132 |  |
| 133 |  |
| 134 |  |
| 135 |  |
| 136 |  |
| 137 |  |
| 138 |  |
| 139 |  |
| 140 |  |
| 141 |  |
| 142 |  |
| 143 |  |
| 144 |  |
| 145 |  |
| 146 |  |
| 147 |  |
| 148 |  |
| 149 |  |
| 150 |  |
| 151 |  |
| 152 |  |
| 153 |  |
| 154 |  |
| 155 |  |
| 156 |  |
| 157 |  |
| 158 |  |
| 159 |  |
| 160 |  |
| 161 |  |
| 162 |  |
| 163 |  |
| 164 |  |
| 165 |  |
| 166 |  |
| 167 |  |
| 168 |  |
| 169 |  |
| 170 |  |
| 171 |  |
| 172 |  |
| 173 |  |
| 174 |  |
| 175 |  |
| 176 |  |
| 177 |  |
| 178 |  |
| 179 |  |
| 180 |  |
| 181 |  |
| 182 |  |
| 183 |  |
| 184 |  |
| 185 |  |
| 186 |  |
| 187 |  |
| 188 |  |
| 189 |  |
| 190 |  |
| 191 |  |
| 192 |  |
| 193 |  |
| 194 |  |
| 195 |  |
| 196 |  |
| 197 |  |
| 198 |  |
| 199 |  |
| 200 |  |
| 201 |  |
| 202 |  |
| 203 |  |
| 204 |  |
| 205 |  |
| 206 |  |
| 207 |  |
| 208 |  |
| 209 |  |
| 210 |  |
| 211 |  |
| 212 |  |
| 213 |  |
| 214 |  |
| 215 |  |
| 216 |  |
| 217 |  |
| 218 |  |
| 219 |  |
| 220 |  |
| 221 |  |
| 222 |  |
| 223 |  |
| 224 |  |
| 225 |  |
| 226 |  |
| 227 |  |
| 228 |  |
| 229 |  |
| 230 |  |
| 231 |  |
| 232 |  |
| 233 |  |
| 234 |  |
| 235 |  |
| 236 |  |
| 237 |  |
| 238 |  |
| 239 |  |
| 240 |  |
| 241 |  |
| 242 |  |
| 243 |  |
| 244 |  |
| 245 |  |
| 246 |  |
| 247 |  |
| 248 |  |
| 249 |  |
| 250 |  |
| 251 |  |
| 252 |  |
| 253 |  |
| 254 |  |
| 255 |  |
| 256 |  |
| 257 |  |
| 258 |  |
| 259 |  |
| 260 |  |
| 261 |  |
| 262 |  |
| 263 |  |
| 264 |  |
| 265 |  |
| 266 |  |
| 267 |  |
| 268 |  |
| 269 |  |
| 270 |  |
| 271 |  |
| 272 |  |
| 273 |  |
| 274 |  |
| 275 |  |
| 276 |  |
| 277 |  |
| 278 |  |
| 279 |  |
| 280 |  |
| 281 |  |
| 282 |  |
| 283 |  |
| 284 |  |
| 285 |  |
| 286 |  |
| 287 |  |
| 288 |  |
| 289 |  |
| 290 |  |
| 291 |  |
| 292 |  |
| 293 |  |
| 294 |  |
| 295 |  |
| 296 |  |
| 297 |  |
| 298 |  |
| 299 |  |
| 300 |  |
| 301 |  |
| 302 |  |
| 303 |  |
| 304 |  |
| 305 |  |
| 306 |  |
| 307 |  |
| 308 |  |
| 309 |  |
| 310 |  |
| 311 |  |
| 312 |  |
| 313 |  |
| 314 |  |
| 315 |  |
| 316 |  |
| 317 |  |
| 318 |  |
| 319 |  |
| 320 |  |
| 321 |  |
| 322 |  |
| 323 |  |
| 324 |  |
| 325 |  |
| 326 |  |
| 327 |  |
| 328 |  |
| 329 |  |
| 330 |  |
| 331 |  |
| 332 |  |
| 333 |  |
| 334 |  |
| 335 |  |
| 336 |  |
| 337 |  |
| 338 |  |
| 339 |  |
| 340 |  |
| 341 |  |
| 342 |  |
| 343 |  |
| 344 |  |
| 345 |  |
| 346 |  |
| 347 |  |
| 348 |  |
| 349 |  |
| 350 |  |
| 351 |  |
| 352 |  |
| 353 |  |
| 354 |  |
| 355 |  |
| 356 |  |
| 357 |  |
| 358 |  |
| 359 |  |
| 360 |  |
| 361 |  |
| 362 |  |
| 363 |  |
| 364 |  |
| 365 |  |
| 366 |  |
| 367 |  |
| 368 |  |
| 369 |  |
| 370 |  |
| 371 |  |
| 372 |  |
| 373 |  |
| 374 |  |
| 375 |  |
| 376 |  |
| 377 |  |
| 378 |  |
| 379 |  |
| 380 |  |
| 381 |  |
| 382 |  |
| 383 |  |
| 384 |  |
| 385 |  |
| 386 |  |
| 387 |  |
| 388 |  |
| 389 |  |
| 390 |  |
| 391 |  |
| 392 |  |
| 393 |  |
| 394 |  |
| 395 |  |
| 396 |  |
| 397 |  |
| 398 |  |
| 399 |  |
| 400 |  |
| 401 |  |
| 402 |  |
| 403 |  |
| 404 |  |
| 405 |  |
| 406 |  |
| 407 |  |
| 408 |  |
| 409 |  |
| 410 |  |
| 411 |  |
| 412 |  |
| 413 |  |
| 414 |  |
| 415 |  |
| 416 |  |
| 417 |  |
| 418 |  |
| 419 |  |
| 420 |  |
| 421 |  |
| 422 |  |
| 423 |  |
| 424 |  |
| 425 |  |
| 426 |  |
| 427 |  |
| 428 |  |
| 429 |  |
| 430 |  |
| 431 |  |
| 432 |  |
| 433 |  |
| 434 |  |
| 435 |  |
| 436 |  |
| 437 |  |
| 438 |  |
| 439 |  |
| 440 |  |
| 441 |  |
| 442 |  |
| 443 |  |
| 444 |  |
| 445 |  |
| 446 |  |
| 447 |  |
| 448 |  |
| 449 |  |
| 450 |  |
| 451 |  |
| 452 |  |
| 453 |  |
| 454 |  |
| 455 |  |
| 456 |  |
| 457 |  |
| 458 |  |
| 459 |  |
| 460 |  |
| 461 |  |
| 462 |  |
| 463 |  |
| 464 |  |
| 465 |  |
| 466 |  |
| 467 |  |
| 468 |  |
| 469 |  |
| 470 |  |
| 471 |  |
| 472 |  |
| 473 |  |
| 474 |  |
| 475 |  |
| 476 |  |
| 477 |  |
| 478 |  |
| 479 |  |
| 480 |  |
| 481 |  |
| 482 |  |
| 483 |  |
| 484 |  |
| 485 |  |
| 486 |  |
| 487 |  |
| 488 |  |
| 489 |  |
| 490 |  |
| 491 |  |
| 492 |  |
| 493 |  |
| 494 |  |
| 495 |  |
| 496 |  |
| 497 |  |
| 498 |  |
| 499 |  |
| 500 |  |
| 501 |  |
| 502 |  |
| 503 |  |
| 504 |  |
| 505 |  |
| 506 |  |
| 507 |  |
| 508 |  |
| 509 |  |
| 510 |  |
| 511 |  |
| 512 |  |
| 513 |  |
| 514 |  |
| 515 |  |
| 516 |  |
| 517 |  |
| 518 |  |
| 519 |  |
| 520 |  |
| 521 |  |
| 522 |  |
| 523 |  |
| 524 |  |
| 525 |  |
| 526 |  |
| 527 |  |
| 528 |  |
| 529 |  |
| 530 |  |
| 531 |  |
| 532 |  |
| 533 |  |
| 534 |  |
| 535 |  |
| 536 |  |
| 537 |  |
| 538 |  |
| 539 |  |
| 540 |  |
| 541 |  |
| 542 |  |
| 543 |  |
| 544 |  |
| 545 |  |
| 546 |  |
| 547 |  |
| 548 |  |
| 549 |  |
| 550 |  |
| 551 |  |
| 552 |  |
| 553 |  |
| 554 |  |
| 555 |  |
| 556 |  |
| 557 |  |
| 558 |  |
| 559 |  |
| 560 |  |
| 561 |  |
| 562 |  |
| 563 |  |
| 564 |  |
| 565 |  |
| 566 |  |
| 567 |  |
| 568 |  |
| 569 |  |
| 570 |  |
| 571 |  |
| 572 |  |
| 573 |  |
| 574 |  |
| 575 |  |
| 576 |  |
| 577 |  |
| 578 |  |
| 579 |  |
| 580 |  |
| 581 |  |
| 582 |  |
| 583 |  |
| 584 |  |
| 585 |  |
| 586 |  |
| 587 |  |
| 588 |  |
| 589 |  |
| 590 |  |
| 591 |  |
| 592 |  |
| 593 |  |
| 594 |  |
| 595 |  |
| 596 |  |
| 597 |  |
| 598 |  |
| 599 |  |
| 600 |  |
| 601 |  |
| 602 |  |
| 603 |  |
| 604 |  |
| 605 |  |
| 606 |  |
| 607 |  |
| 608 |  |
| 609 |  |
| 610 |  |
| 611 |  |
| 612 |  |
| 613 |  |
| 614 |  |
| 615 |  |
| 616 |  |
| 617 |  |
| 618 |  |
| 619 |  |
| 620 |  |
| 621 |  |
| 622 |  |
| 623 |  |
| 624 |  |
| 625 |  |
| 626 |  |
| 627 |  |
| 628 |  |
| 629 |  |
| 630 |  |
| 631 |  |
| 632 |  |
| 633 |  |
| 634 |  |
| 635 |  |
| 636 |  |
| 637 |  |
| 638 |  |
| 639 |  |
| 640 |  |
| 641 |  |
| 642 |  |
| 643 |  |
| 644 |  |
| 645 |  |
| 646 |  |
| 647 |  |
| 648 |  |
| 649 |  |
| 650 |  |
| 651 |  |
| 652 |  |
| 653 |  |
| 654 |  |
| 655 |  |
| 656 |  |
| 657 |  |
| 658 |  |
| 659 |  |
| 660 |  |
| 661 |  |
| 662 |  |
| 663 |  |
| 664 |  |
| 665 |  |
| 666 |  |
| 667 |  |
| 668 |  |
| 669 |  |
| 670 |  |
| 671 |  |
| 672 |  |
| 673 |  |
| 674 |  |
| 675 |  |
| 676 |  |
| 677 |  |
| 678 |  |
| 679 |  |
| 680 |  |
| 681 |  |
| 682 |  |
| 683 |  |
| 684 |  |
| 685 |  |
| 686 |  |
| 687 |  |
| 688 |  |
| 689 |  |
| 690 |  |
| 691 |  |
| 692 |  |
| 693 |  |
| 694 |  |
| 695 |  |
| 696 |  |
| 697 |  |
| 698 |  |
| 699 |  |
| 700 |  |
| 701 |  |
| 702 |  |
| 703 |  |
| 704 |  |
| 705 |  |
| 706 |  |
| 707 |  |
| 708 |  |
| 709 |  |
| 710 |  |
| 711 |  |
| 712 |  |
| 713 |  |
| 714 |  |
| 715 |  |
| 716 |  |
| 717 |  |
| 718 |  |
| 719 |  |
| 720 |  |
| 721 |  |
| 722 |  |
| 723 |  |
| 724 |  |
| 725 |  |
| 726 |  |
| 727 |  |
| 728 |  |
| 729 |  |
| 730 |  |
| 731 |  |
| 732 |  |
| 733 |  |
| 734 |  |
| 735 |  |
| 736 |  |
| 737 |  |
| 738 |  |
| 739 |  |
| 740 |  |
| 741 |  |
| 742 |  |
| 743 |  |
| 744 |  |
| 745 |  |
| 746 |  |
| 747 |  |
| 748 |  |
| 749 |  |
| 750 |  |
| 751 |  |
| 752 |  |
| 753 |  |
| 754 |  |
| 755 |  |
| 756 |  |
| 757 |  |
| 758 |  |
| 759 |  |
| 760 |  |
| 761 |  |
| 762 |  |
| 763 |  |
| 764 |  |
| 765 |  |
| 766 |  |
| 767 |  |
| 768 |  |
| 769 |  |
| 770 |  |
| 771 |  |
| 772 |  |
| 773 |  |
| 774 |  |
| 77  |  |

1  
2  
3  
4  
5  
6  
7  
8  
9  
10  
11  
12  
13  
14  
15  
16  
17  
18  
19  
20  
21  
22  
23  
24  
25  
26  
27  
28  
29  
30  
31  
32  
33  
34  
35  
36  
37  
38  
39  
40  
41  
42  
43  
44  
45  
46  
47

**Appendix Table 4: Risk of bias assessment**

| Author Yr       | 1. Randomization adequate? | 2. Allocation concealed? | 3. Patient blinded? | 4. Outcome assessor blinded? | 5. run-in period? | 7. Wash-out? | 8. Statistical methods appropriate?* | 9. All randomized participants analyzed? | 10. Incomplete outcome data |
|-----------------|----------------------------|--------------------------|---------------------|------------------------------|-------------------|--------------|--------------------------------------|------------------------------------------|-----------------------------|
| Nikles 2014     | Low                        | Low                      | Low                 | Low                          | High              | High         | Low                                  | High                                     | Low                         |
| Tison 2013      | Unclear                    | Low                      | Low                 | Low                          | High              | Low          | High                                 | Low                                      | Low                         |
| Rascol 2012     | Unclear                    | Unclear                  | Low                 | Low                          | Low               | Low          | Low                                  | High                                     | Low                         |
| Emmanuel 2012   | Unclear                    | Unclear                  | Low                 | Low                          | High              | High         | High                                 | High                                     | Low                         |
| Yelland 2009    | Low                        | Low                      | Low                 | Low                          | High              | High         | Low                                  | High                                     | Low                         |
| Brookes 2007    | Low                        | Low                      | Low                 | Low                          | High              | High         | unclear                              | High                                     | Low                         |
| Nonoyama2007    | Low                        | Low                      | Low                 | Low                          | High              | High         | unclear                              | High                                     | Low                         |
| Huber 2007      | Low                        | Low                      | Low                 | Low                          | High              | Low          | High                                 | Low                                      | Low                         |
| Yelland 2007    | Low                        | Unclear                  | Low                 | Low                          | High              | High         | Low                                  | High                                     | Low                         |
| Zucker 2006     | Low                        | Unclear                  | Low                 | Low                          | Low               | High         | Low                                  | High                                     | Low                         |
| Nikles 2006     | Low                        | Unclear                  | Low                 | Low                          | High              | Low          | High                                 | High                                     | Low                         |
| Nathan 2006     | Low                        | Low                      | Low                 | Low                          | High              | High         | High                                 | High                                     | Low                         |
| Pereira 1995    | Unclear                    | Low                      | Low                 | Low                          | High              | High         | High                                 | Low                                      | Low                         |
| Woodfield 2005  | Low                        | Low                      | Low                 | Low                          | Low               | Low          | Low                                  | Low                                      | Low                         |
| Wegman 2005     | Low                        | Unclear                  | Low                 | Low                          | High              | High         | Low                                  | High                                     | Low                         |
| Nikles 2005     | Low                        | Unclear                  | Low                 | Low                          | High              | Low          | High                                 | High                                     | Low                         |
| Smith 2004      | Low                        | Low                      | Low                 | Low                          | Low               | High         | Low                                  | High                                     | Low                         |
| Haas 2004       | Low                        | Low                      | Low                 | Low                          | High              | High         | Low                                  | High                                     | Low                         |
| Mandelcorn 2004 | Low                        | Unclear                  | Low                 | Low                          | Low               | High         | High                                 | Low                                      | Low                         |
| Pope 2004       | Unclear                    | High                     | Low                 | Low                          | High              | High         | Low                                  | Low                                      | Low                         |
| Wegman 2003     | Low                        | Low                      | Low                 | Low                          | High              | High         | Low                                  | High                                     | Low                         |

|    |                    |         |         |      |      |         |      |      |      |     |
|----|--------------------|---------|---------|------|------|---------|------|------|------|-----|
| 1  | Wolfe 2002         | Low     | Low     | Low  | Low  | High    | Low  | Low  | High | Low |
| 2  | Reitberg 2002      | Low     | Low     | Low  | Low  | Low     | High | Low  | Low  | Low |
| 3  | Lindsay 2001       | Unclear | Low     | Low  | Low  | Low     | High | High | High | Low |
| 4  | Duggan 2000        | Unclear | Unclear | Low  | Low  | High    | High | High | Low  | Low |
| 5  | Nikles 2000        | Unclear | Unclear | Low  | Low  | High    | High | High | High | Low |
| 6  | Mahon 1999         | Low     | Unclear | Low  | Low  | High    | Low  | High | High | Low |
| 7  | Bollert 1999       | Unclear | Unclear | Low  | Low  | High    | High | High | High | Low |
| 8  | Kent 1999          | Unclear | Unclear | Low  | Low  | High    | High | High | Low  | Low |
| 9  | Webb 1999          | Unclear | Unclear | Low  | Low  | Low     | Low  | High | High | Low |
| 10 | Haines 1999        | Unclear | Unclear | Low  | Low  | Low     | Low  | Low  | High | Low |
| 11 | Sheather-Reid 1998 | Unclear | Unclear | Low  | Low  | High    | High | Low  | High | Low |
| 12 | Camfield 1996      | Unclear | Unclear | Low  | Low  | High    | High | High | Low  | Low |
| 13 | Mahon 1996         | Low     | Unclear | Low  | Low  | High    | High | High | Low  | Low |
| 14 | Miyazaki 1995      | Unclear | High    | High | High | High    | High | High | High | Low |
| 15 | Maier 1994         | Unclear | Unclear | Low  | Low  | Low     | Low  | Low  | High | Low |
| 16 | McQuay 1994        | Low     | Low     | Low  | Low  | High    | High | High | High | Low |
| 17 | March 1994         | Unclear | Unclear | Low  | Low  | High    | High | Low  | High | Low |
| 18 | Denburg 1994       | Unclear | Unclear | Low  | Low  | Low     | Low  | High | High | Low |
| 19 | Privitera 1994     | Unclear | Unclear | Low  | Low  | High    | High | High | Low  | Low |
| 20 | Wallace 1994       | High    | Unclear | Low  | Low  | High    | High | High | Low  | Low |
| 21 | Langer 1993        | Low     | Low     | Low  | Low  | High    | High | High | Low  | Low |
| 22 | Molloy 1993        | Unclear | Unclear | Low  | Low  | Low     | Low  | Low  | High | Low |
| 23 | Johannessen 1992   | Unclear | Unclear | Low  | Low  | High    | Low  | High | High | Low |
| 24 | Johannessen 1991   | Unclear | Unclear | Low  | Low  | High    | High | Low  | Low  | Low |
| 25 | Patel 1991         | Unclear | Unclear | Low  | Low  | High    | High | High | Low  | Low |
| 26 | Larsen 1991        | Unclear | Unclear | Low  | Low  | High    | High | High | High | Low |
| 27 | Jaeschke 1991      | Unclear | Unclear | Low  | Low  | low     | High | High | High | low |
| 28 | Hinderer 1990      | Unclear | Unclear | Low  | Low  | low     | High | high | low  | low |
| 29 | Lashner 1990       | Unclear | Low     | Low  | Low  | Unclear | High | high | low  | low |
| 30 |                    |         |         |      |      |         |      |      |      |     |
| 31 |                    |         |         |      |      |         |      |      |      |     |
| 32 |                    |         |         |      |      |         |      |      |      |     |
| 33 |                    |         |         |      |      |         |      |      |      |     |
| 34 |                    |         |         |      |      |         |      |      |      |     |
| 35 |                    |         |         |      |      |         |      |      |      |     |
| 36 |                    |         |         |      |      |         |      |      |      |     |
| 37 |                    |         |         |      |      |         |      |      |      |     |
| 38 |                    |         |         |      |      |         |      |      |      |     |
| 39 |                    |         |         |      |      |         |      |      |      |     |
| 40 |                    |         |         |      |      |         |      |      |      |     |
| 41 |                    |         |         |      |      |         |      |      |      |     |
| 42 |                    |         |         |      |      |         |      |      |      |     |
| 43 |                    |         |         |      |      |         |      |      |      |     |
| 44 |                    |         |         |      |      |         |      |      |      |     |
| 45 |                    |         |         |      |      |         |      |      |      |     |
| 46 |                    |         |         |      |      |         |      |      |      |     |
| 47 |                    |         |         |      |      |         |      |      |      |     |

1  
2  
3  
4  
5  
6  
7  
8  
9  
10  
11  
12  
13  
14  
15  
16  
17  
18  
19  
20  
21  
22  
23  
24  
25  
26  
27  
28  
29  
30  
31  
32  
33  
34  
35  
36  
37  
38  
39  
40  
41  
42  
43  
44  
45  
46  
47

|               |         |         |     |     |         |      |      |      |      |
|---------------|---------|---------|-----|-----|---------|------|------|------|------|
| McBride 1988  | Low     | Low     | Low | Low | Unclear | High | high | low  | High |
| Menard 1988   | Low     | Unclear | Low | Low | Low     | low  | low  | low  | High |
| Ullmann 1986  | Low     | Unclear | Low | Low | Unclear | High | low  | low  | High |
| Parodi 1986   | Low     | Unclear | Low | Low | low     | Low  | low  | low  | low  |
| Parodi 1979   | Unclear | Unclear | Low | Low | low     | High | High | low  | low  |
| Joy 2014      | Low     | Unclear | Low | Low | High    | Low  | low  | low  | low  |
| Lipka 2017    | Low     | Low     | Low | Low | High    | Low  | High | low  | low  |
| Mitchell 2015 | Low     | Low     | Low | Low | High    | Low  | High | low  | low  |
| Nikles 2015   | Low     | Low     | Low | Low | High    | Low  | High | low  | low  |
| Nikles 2017   | Low     | Low     | Low | Low | High    | Low  | low  | High | low  |
| Nikles 2016   | Low     | Unclear | Low | Low | High    | High | High | low  | High |
| McGarry 2017  | Low     | Low     | Low | Low | Low     | Low  | High | High | High |

\* Statistical methods used to account for carryover effect, period effects, and intra-subject correlation

Peer review only



Appendix Figure 1: Patients with chronic intestinal pseudo-obstruction treated with prucalopride or placebo for pain relief<sup>1</sup>

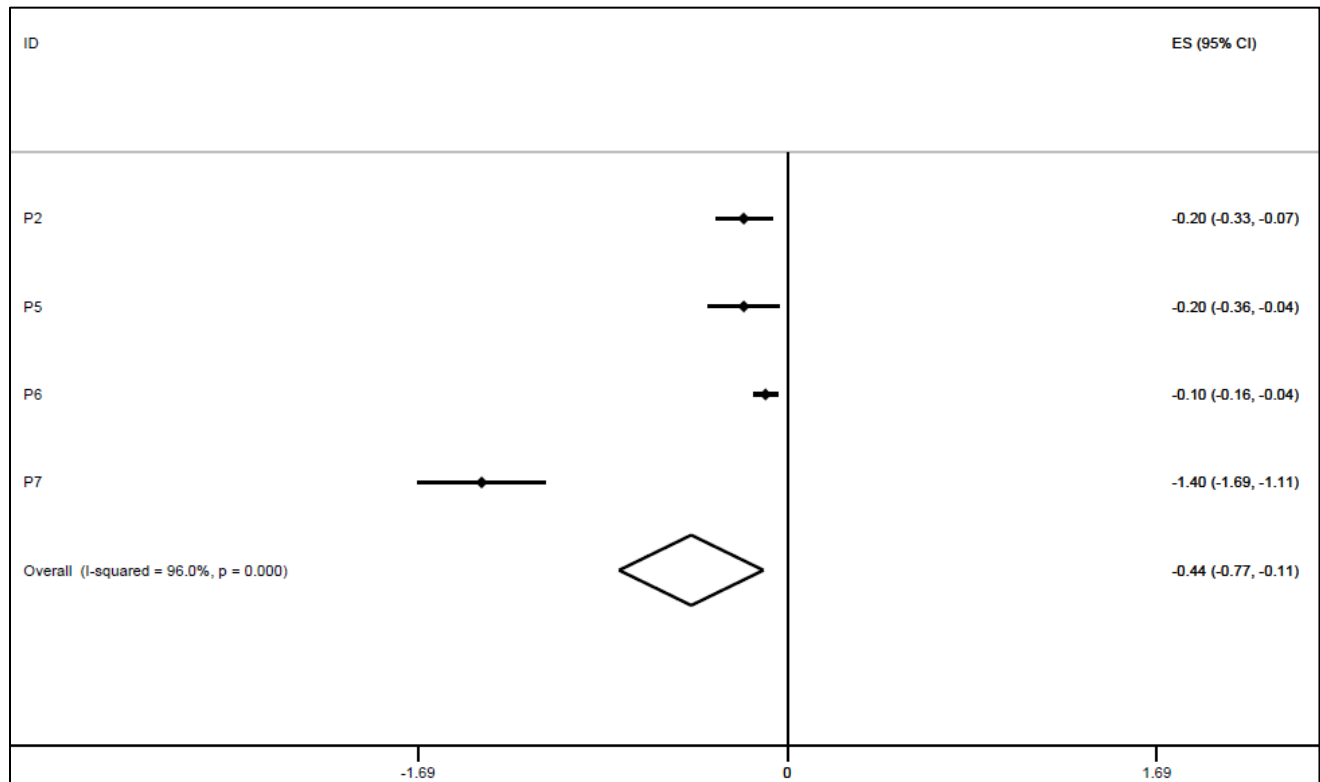

**Appendix Figure 1 Legend:**

Data from this figure was extracted from the study published by Emmanuel et al in 2011, which investigates the use of prucalopride or placebo for pain relief (among other outcomes) in patients with chronic intestinal pseudo-obstruction. The average treatment effect is -0.440 (-0.771 to -0.110).

**Appendix Figure 2: Patients with chronic tension-type headaches treated with dextroamphetamine or control and effect on mean daily grade decrease in headache<sup>2</sup>**

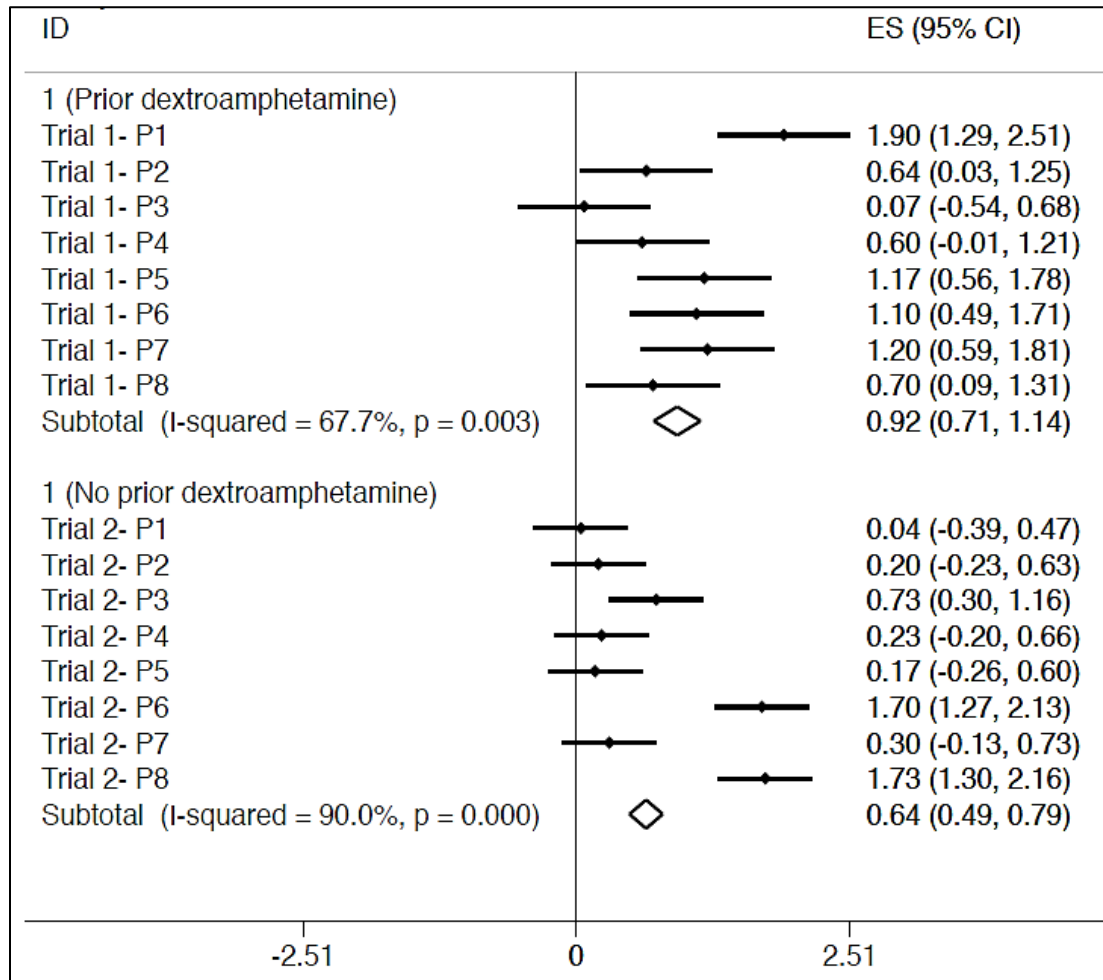

**Appendix Figure 2 Legend:** Data from this figure was extracted from the study published by Haas et al in 2004, which investigates the use of dextroamphetamine or control in patients with chronic-type for improvement on mean daily grade in headache.

**Appendix Figure 3: Patients with migraine headaches treated with dextroamphetamine or control and effect on mean daily grade decrease in headache<sup>2</sup>**

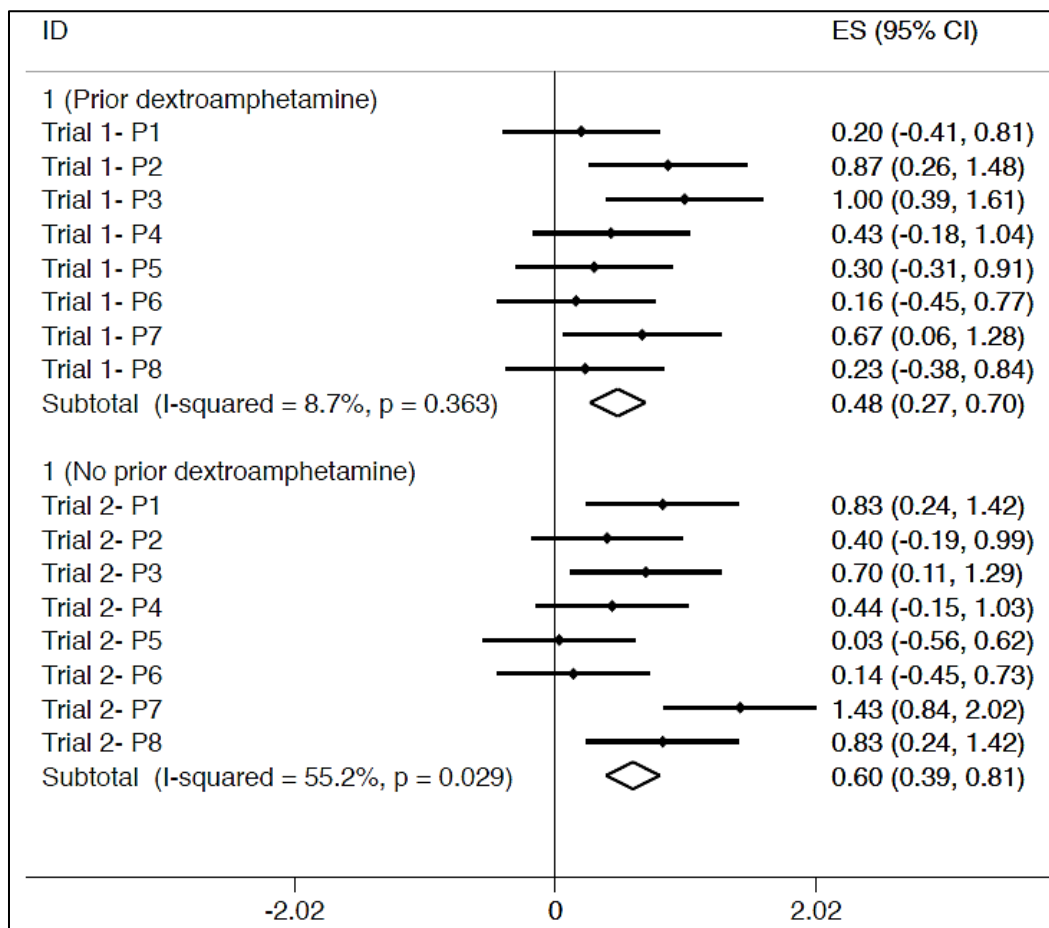

**Appendix Figure 3 Legend:** Data from this figure was extracted from the study published by Haas et al in 2004, which investigates the use of dextroamphetamine or control in patients with chronic-type and migraine headaches for improvement on mean daily grade in headache.

**Appendix Figure 4: Patients with fibromyalgia treated with amitriptyline or placebo and its effect on a 7-point symptom scale<sup>3</sup>**

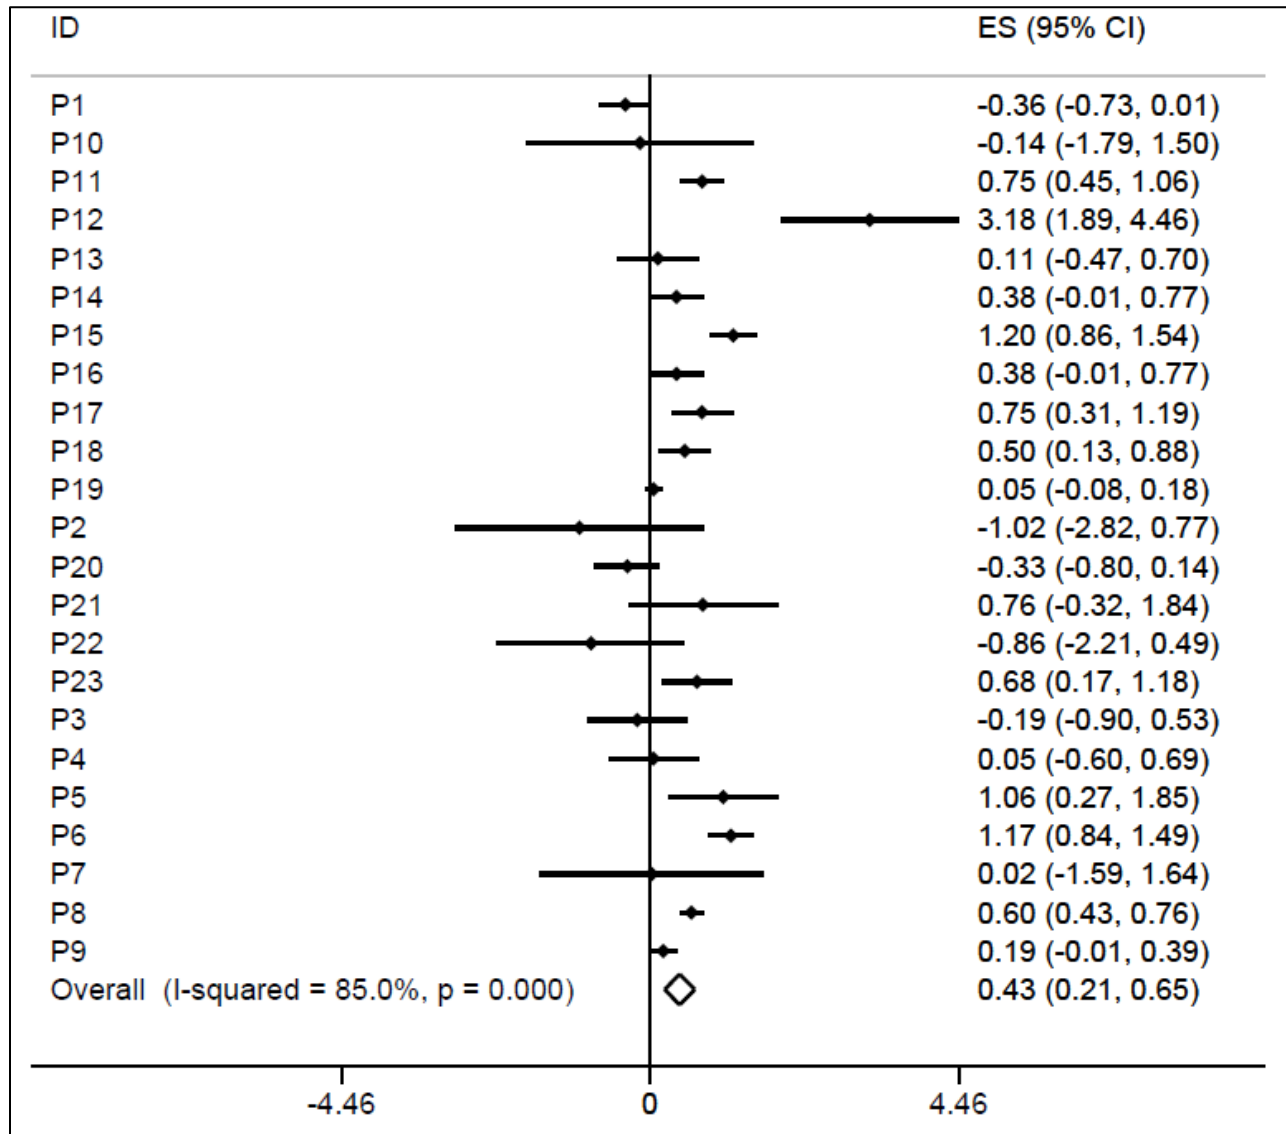

**Appendix Figure 4 Legend:** Data from this figure was extracted from the study published by Jaeschke et al in 1991, which investigates the effect of amitriptyline or placebo on a 7-point symptom scale in patients with fibromyalgia. The average treatment effect is 0.427 (0.210 to 0.645).

**Appendix Figure 5: Patients with fibromyalgia treated with amitriptyline or placebo and its effect on tender point changes count<sup>3</sup>**

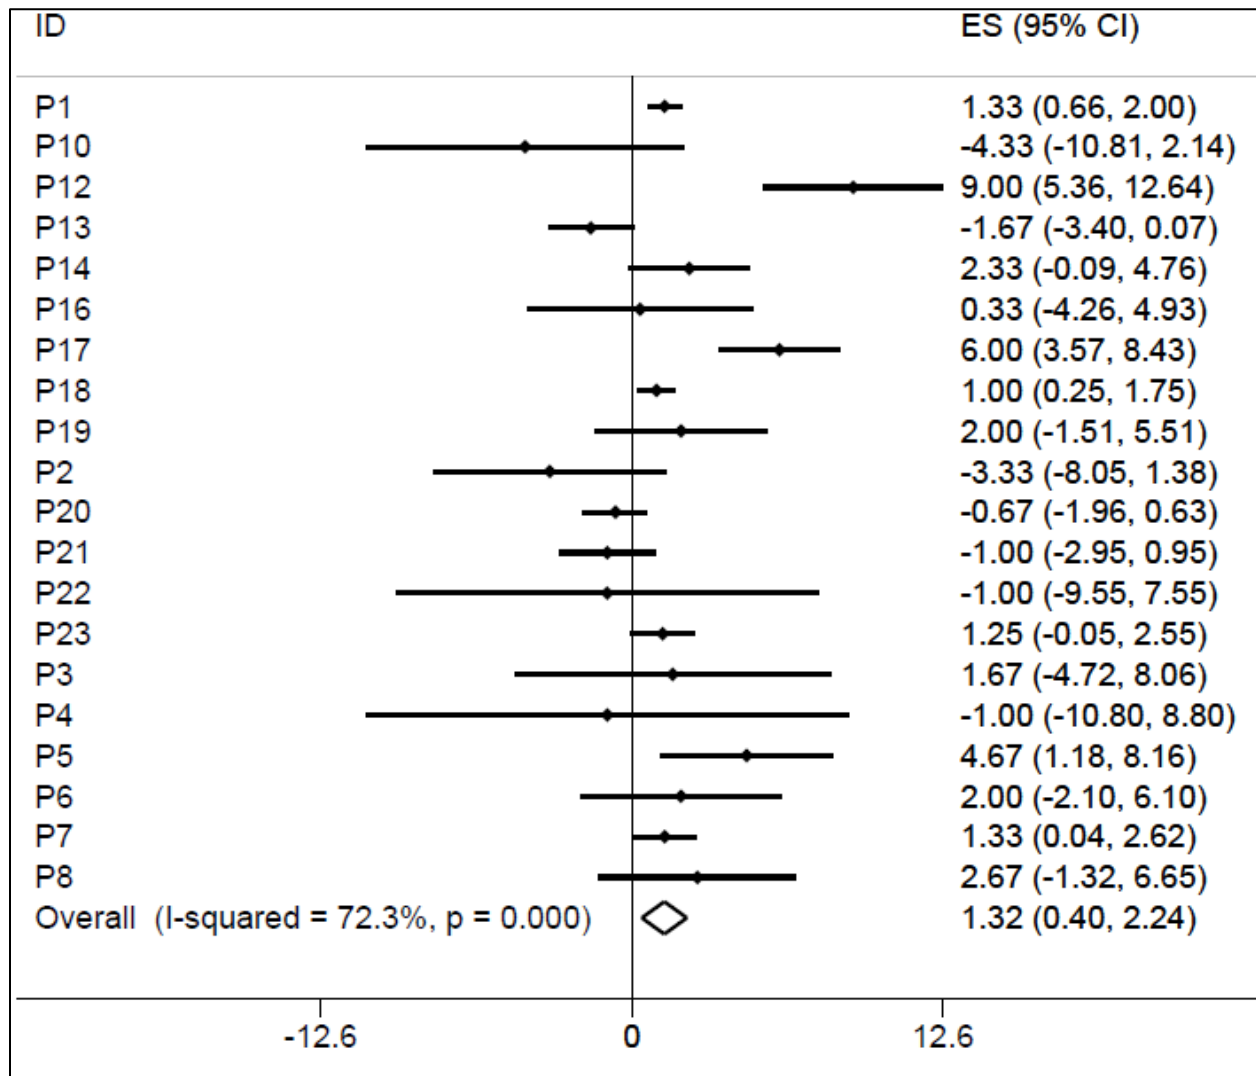

**Appendix Figure 5 Legend:** Data from this figure was extracted from the study published by Jaeschke et al in 1991, which investigates the effect of amitriptyline or placebo on tender point changes count in patients with fibromyalgia. The average treatment effect is 1.320 (0.404 to 2.236).

**Appendix Figure 6: Patients with peptic ulcers, oesophagitis grade I, II, or III, or with reflux or ulcer-like symptom profiles were treated with cimetidine or placebo and its effect on a 6-point symptom scale<sup>4</sup>**

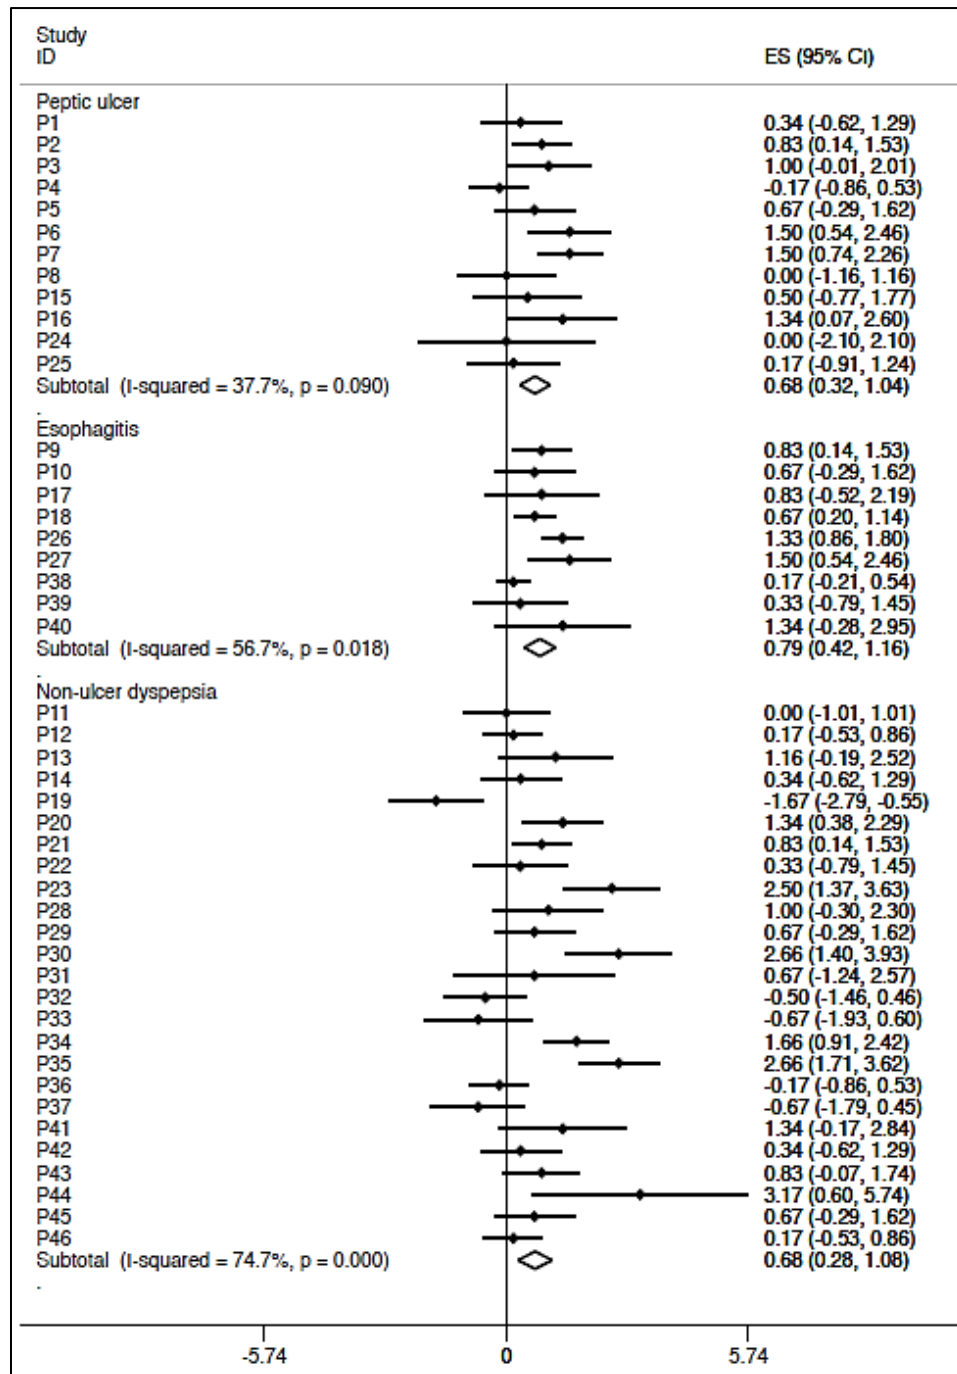

**Appendix Figure 6 Legend:** Data from this figure was extracted from the study published by Johannessen et al in 1992, which investigates the effect of cimetidine or placebo on a 6-point symptom scale in patients with peptic ulcers, oesophagitis grade I, II, or III, or with reflux or ulcer-like symptom profiles. The average treatment effect is 0.698 (0.466 to 0.931).

**Appendix Figure 7: Patients with irreversible chronic airflow limitation treated with theophylline or placebo and its effect on dyspnea<sup>5</sup>**

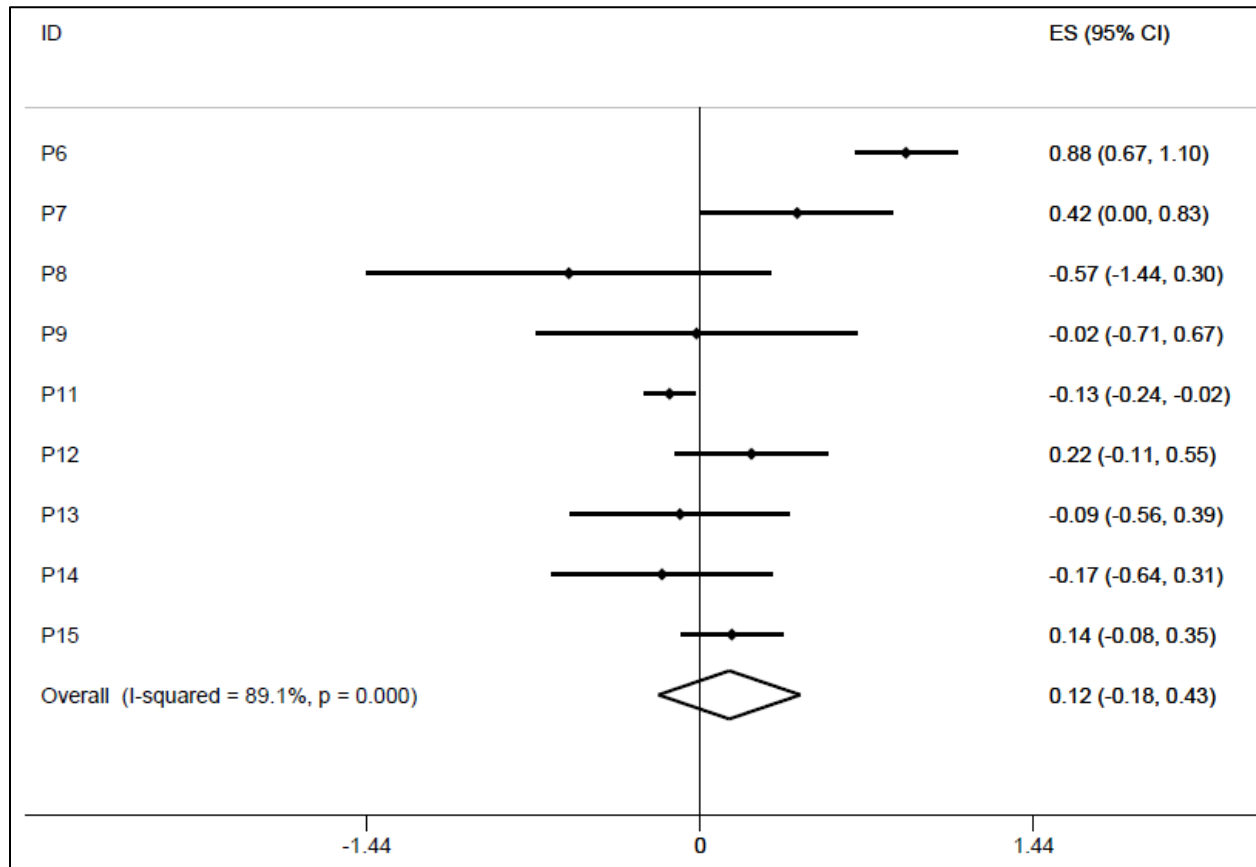

**Appendix Figure 7 Legend:** Data from this figure was extracted from the study published by Mahon et al in 1996, which investigates the effect of theophylline or placebo on dyspnea in patients with irreversible chronic airflow limitation. The average treatment effect is 0.125 (-0.181 to 0.430).

**Appendix Figure 8: Patients with osteoarthritic pain treated with paracetamol and diclofenac and its effect on stiffness<sup>6</sup>**

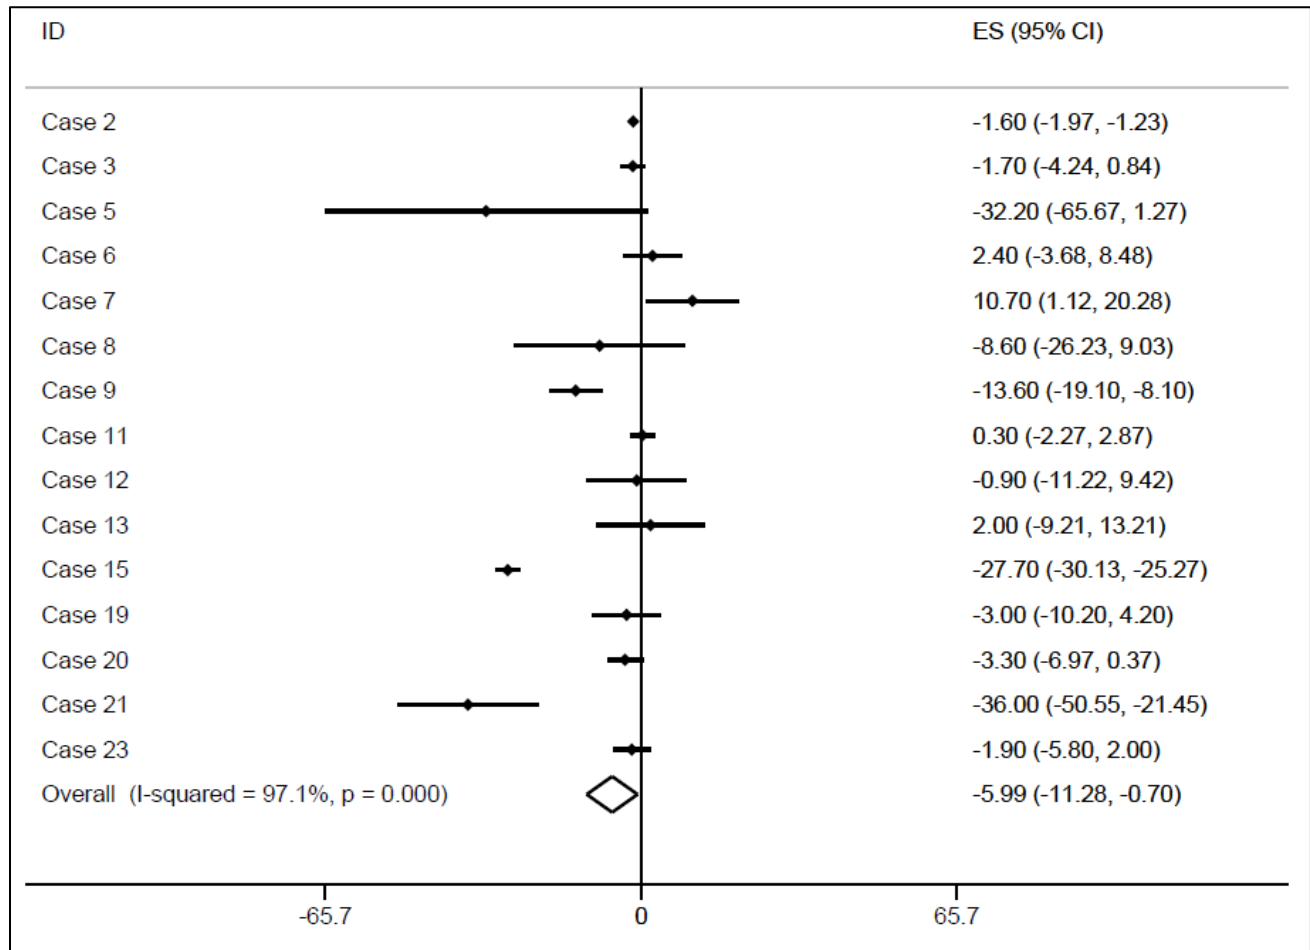

**Appendix Figure 8 Legend:** Data from this figure was extracted from the study published by March et al in 1994, which investigates the effect of paracetamol and diclofenac on stiffness in patients with osteoarthritic pain. The average treatment effect is mean difference in stiffness (mm).



**Appendix Figure 9: Patients with nonreversible chronic airflow limitation treated with either ipratropium bromide, theophylline, salbutamol, or beclomethane (all compared to placebo) and its effect on a 4-item symptom questionnaire<sup>7</sup>**

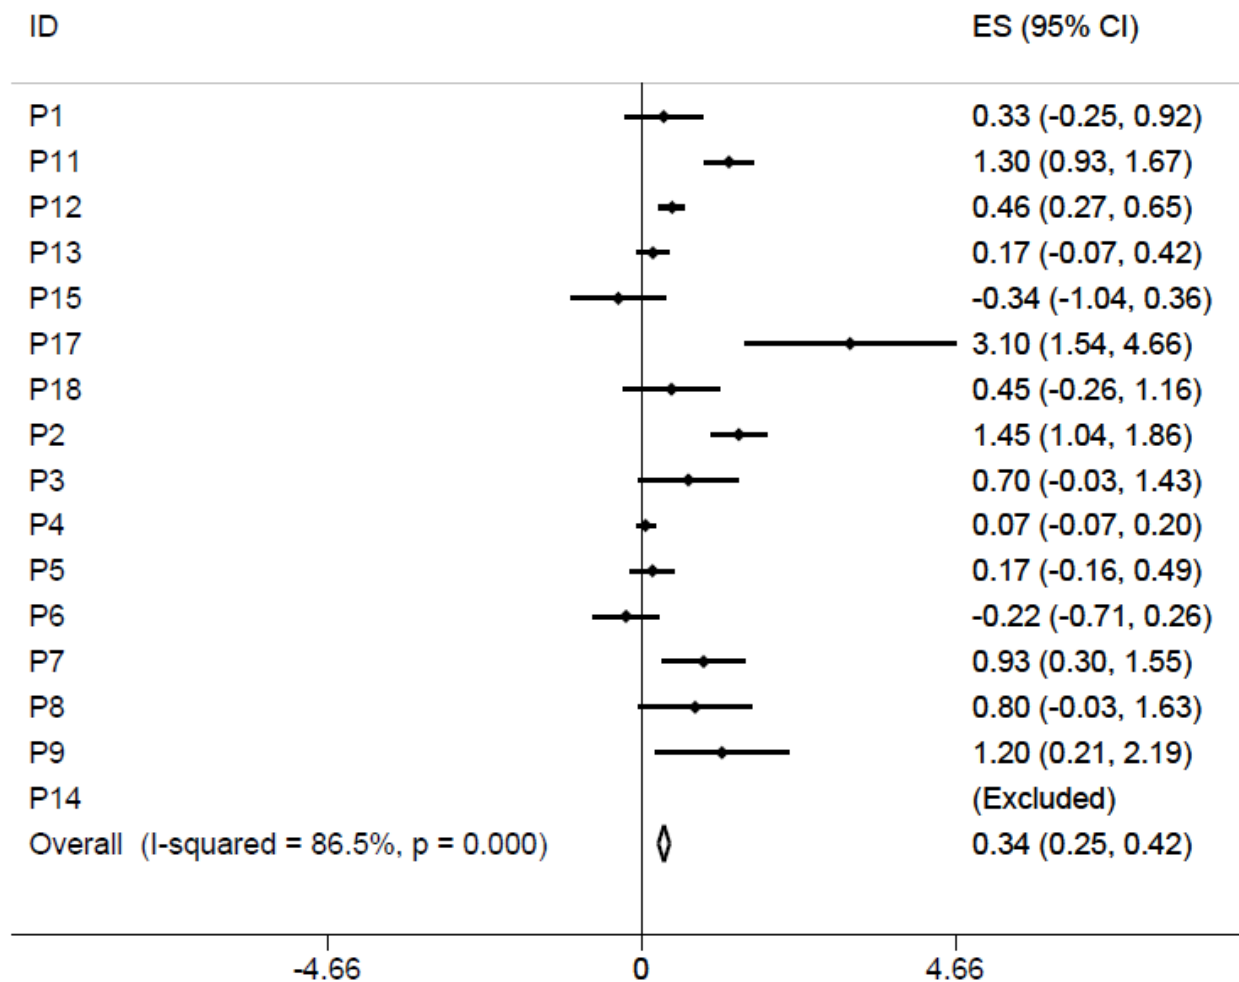

**Appendix Figure 9 Legend:** Data from this figure was extracted from the study published by Patel et al in 1991, which investigates the effect of ipratropium bromide, theophylline, salbutamol, or beclomethane (all compared to placebo) on a 4-item symptom questionnaire in patients with nonreversible chronic airflow limitation. The average treatment effect is 0.340 (0.253 to 0.422).

**Appendix Figure 10: Patients previously taking warfarin for either atrial fibrillation or deep vein thrombosis treated with apo-warfarin and 20coumadin and its effect on international normalized ratio<sup>8</sup>**

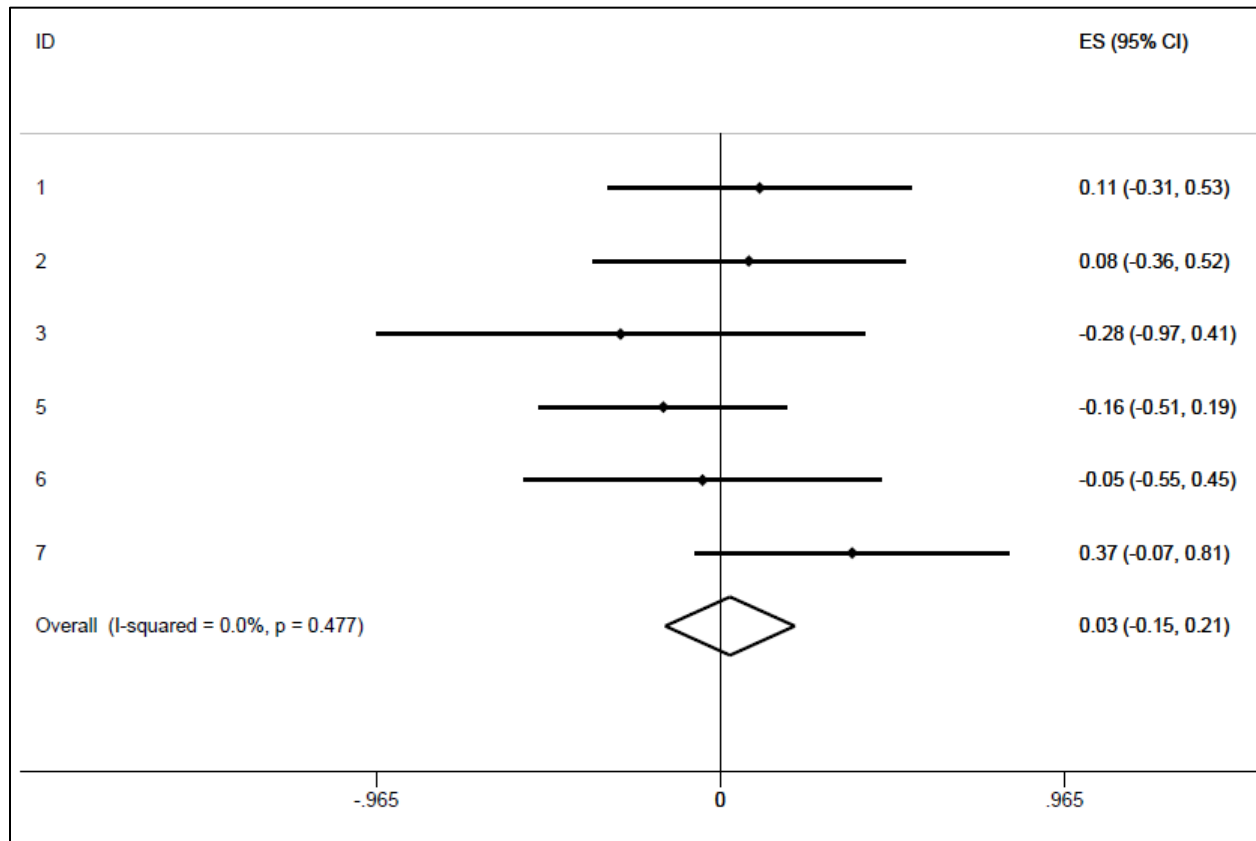

**Appendix Figure 10 Legend:** Data from this figure was extracted from the study published by Pereira et al in 1995, which investigates the effect of apo-warfarin and Coumadin on international normalized ratio in patients previously taking warfarin for either atrial fibrillation or deep vein thrombosis. The average treatment effect is 0.027 (-0.155 to 0.209).

**Appendix Figure 11: Hospitalized children and adolescents with attention-deficit hyperactivity disorder treated with methylphenidate and placebo and its effect on Conners 15-item rating scale scores<sup>9</sup>**

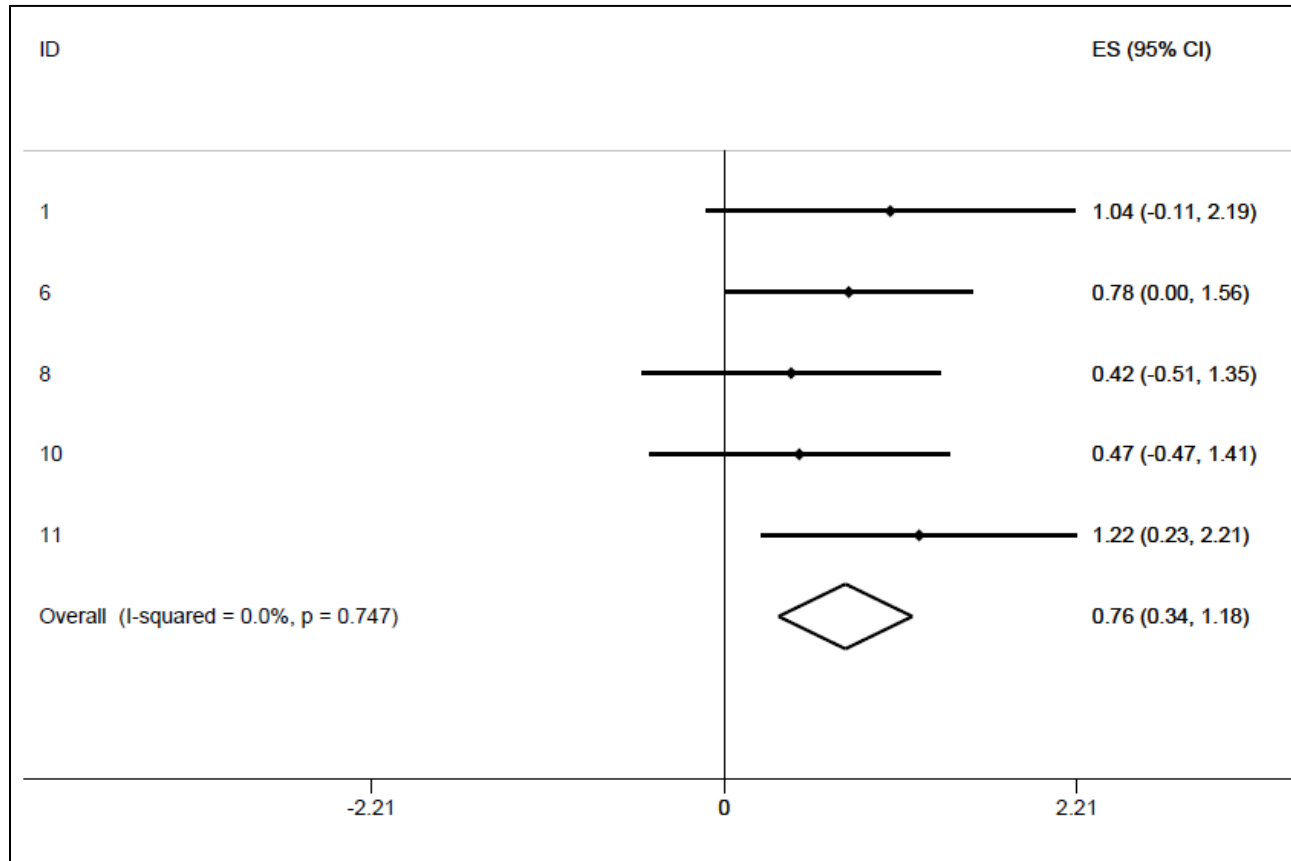

**Appendix Figure 11 Legend:** Data from this figure was extracted from the study published by Wallace et al in 1994, which investigates the effect of methylphenidate and placebo on Conners 15-item rating scale scores in hospitalized children and adolescents with attention-deficit hyperactivity disorder. The average treatment effect is 0.759 (0.341 to 1.178).

**Appendix Figure 12: Patients already prescribed quinine treated with quinine sulphate and placebo, and its effect on changes in number of cramps<sup>10</sup>**

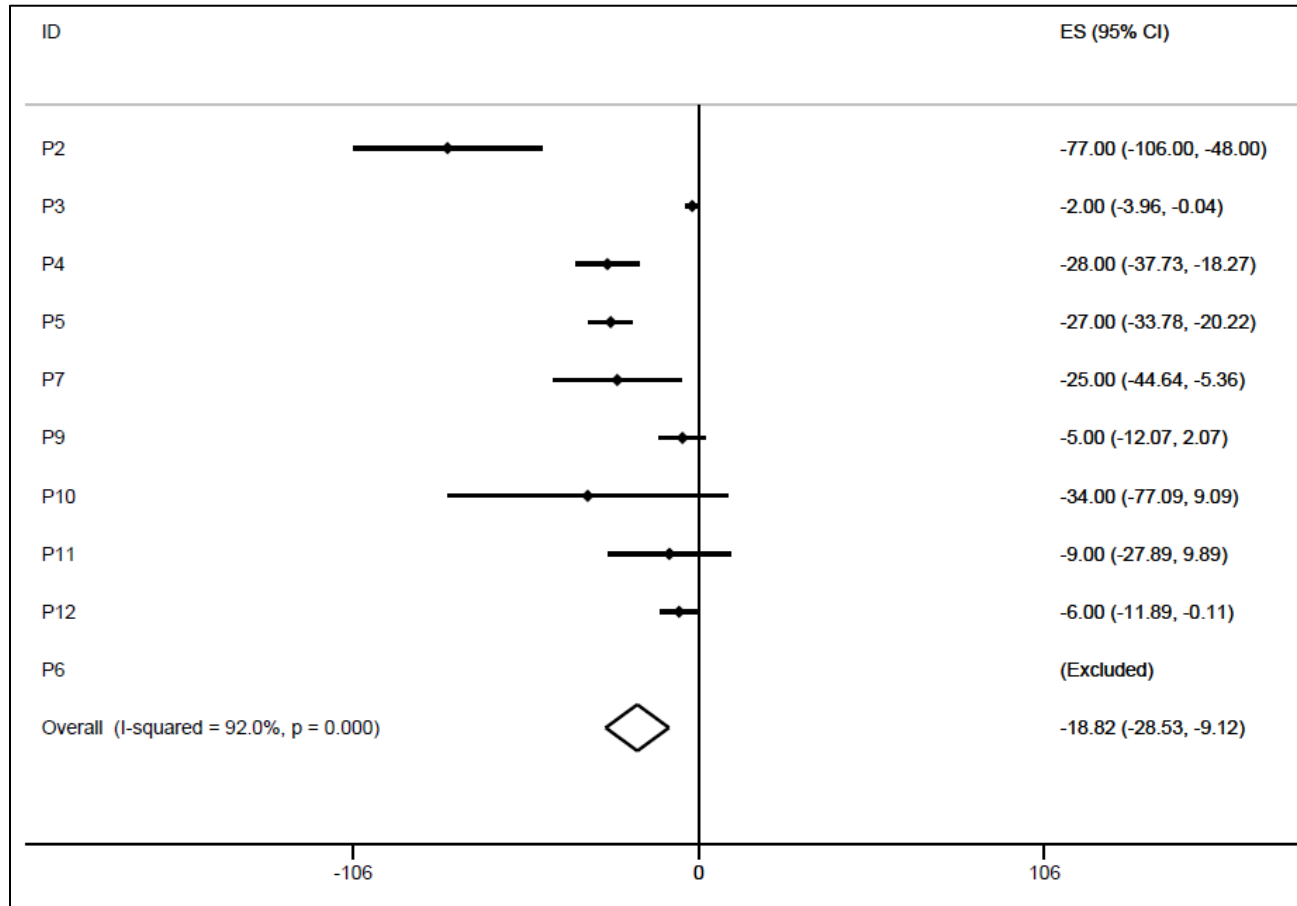

**Appendix Figure 12 Legend:** Data from this figure was extracted from the study published by Woodfield et al in 2005, which investigates the effect of quinine sulphate and placebo on changes in number of cramps in patients already prescribed quinine. The average treatment effect is -18.823 (-28.527 to -9.120).

**Appendix Figure 13: Patients already prescribed quinine treated with quinine sulphate and placebo, and its effect on total days with cramps<sup>10</sup>**

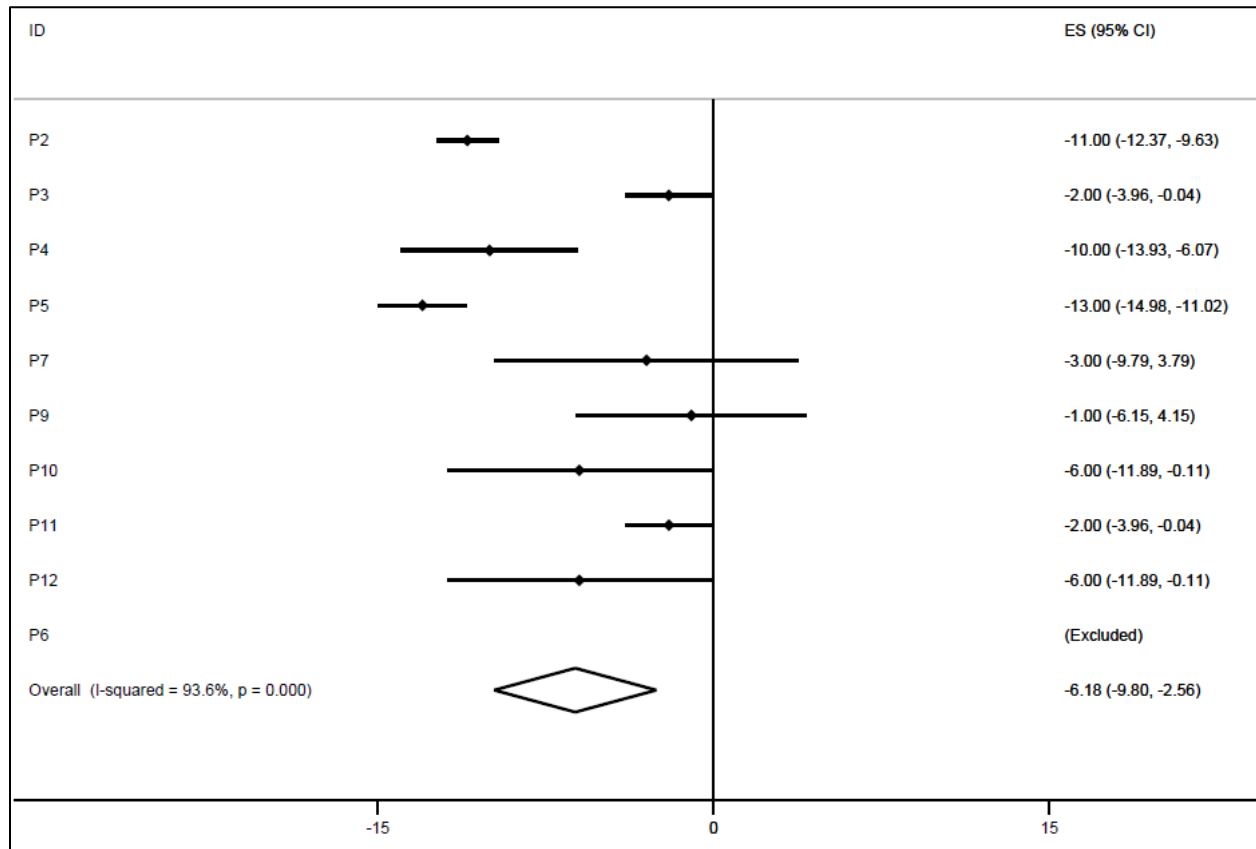

**Appendix Figure 13 Legend:** Data from this figure was extracted from the study published by Woodfield et al in 2005, which investigates the effect of quinine sulphate and placebo on total days with cramps in patients already prescribed quinine. The average treatment effect is -6.181 (-9.798 to -2.563).

**Appendix Figure 14: Patients with fibromyalgia syndrome treated with amitriptyline and the combination amitriptyline and fluoxetine and its effect on the Fibromyalgia Impact Questionnaire<sup>11</sup>**

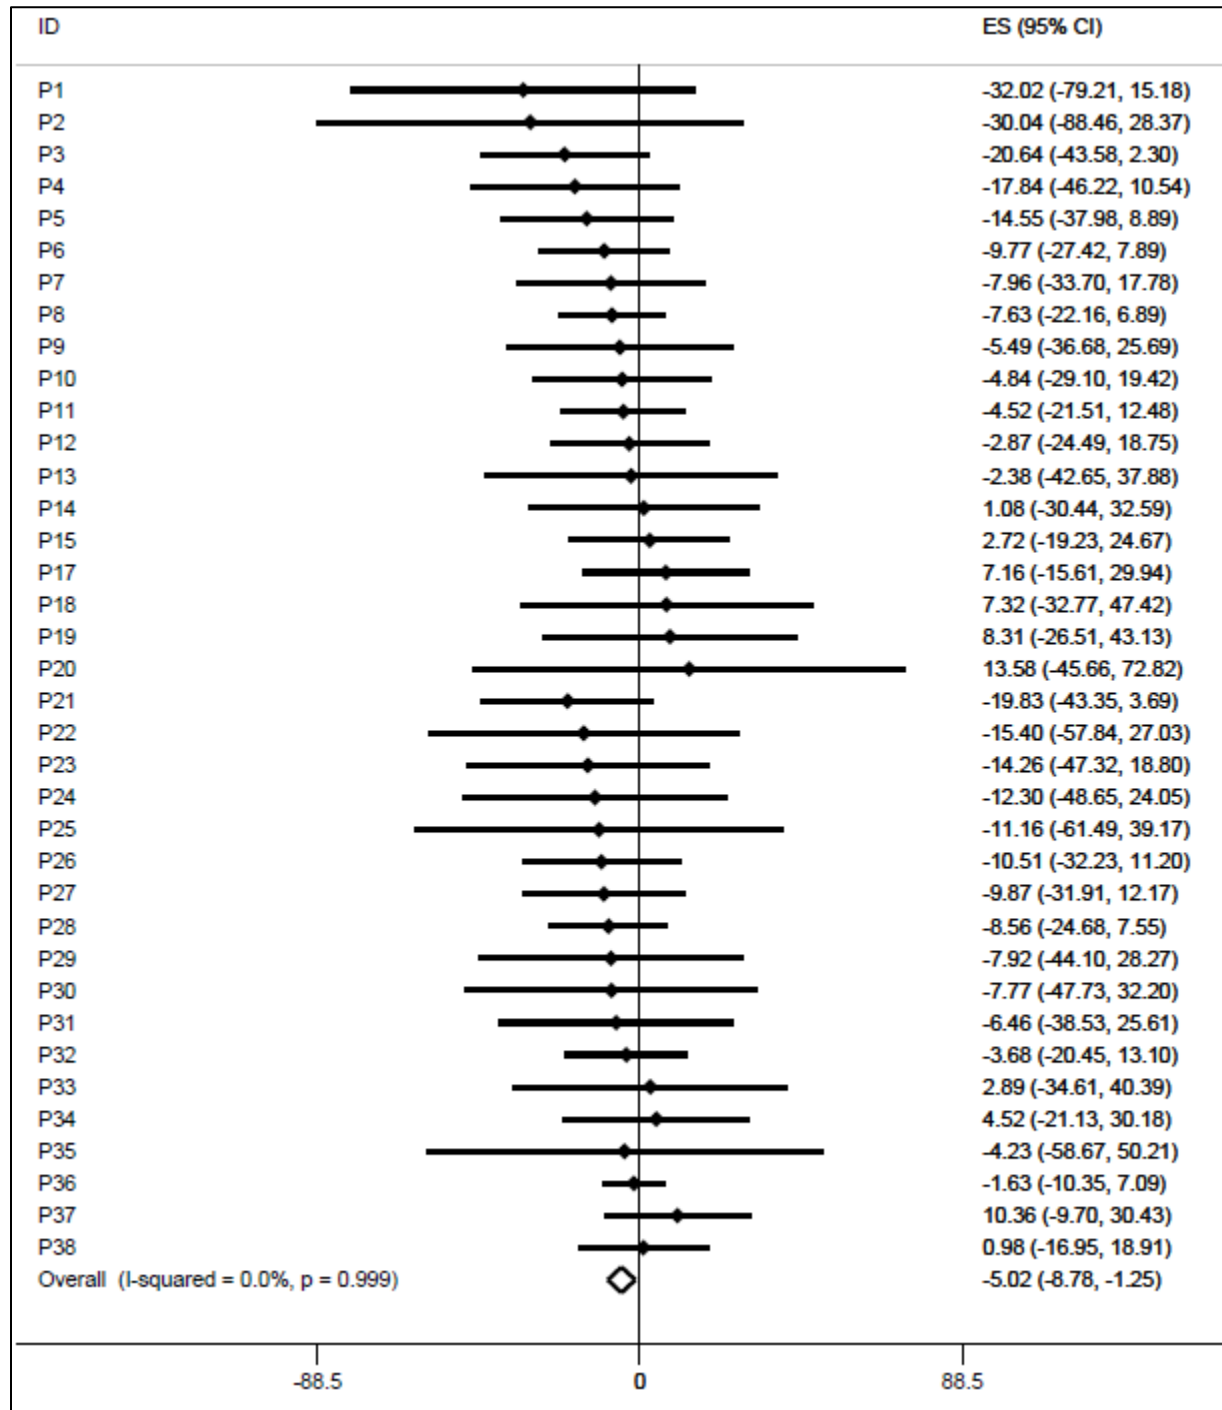

**Appendix Figure 14 Legend:** Data from this figure was extracted from the study published by Zucker et al in 2006, which investigates the effect of amitriptyline and the combination amitriptyline and fluoxetine on Fibromyalgia Impact Questionnaire in patients with fibromyalgia syndrome. The average treatment effect is -5.019 (-8.784 to -1.254).

**Appendix 15: Patients with prior statin-related myalgia with or without mild elevation of creatine kinase levels treated with statin and placebo and its effects on VAS myalgia score<sup>12</sup>**

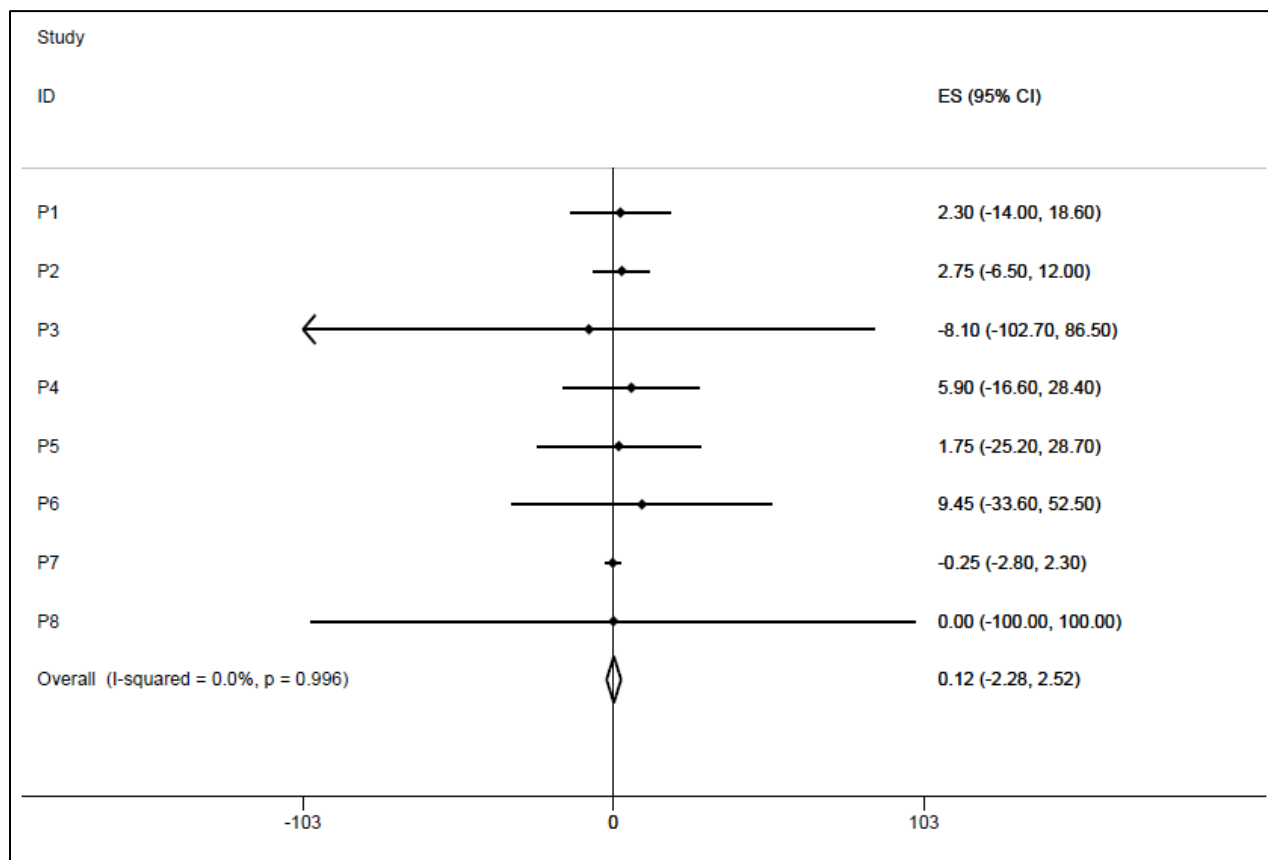

**Appendix 15 Figure Legend:** Data from this figure was extracted from the study published by Joy et al in 2014, which investigates the effect of statin versus placebo on VAS myalgia score in patients with hyperlipidemia. The average treatment effect is 0.12 (-2.28 to 2.52).

**Appendix Figure 16: Patients with myasthenia gravis with acetylcholine receptor antibodies treated with ephipherin and placebo and its effect on QMG score<sup>13</sup>**

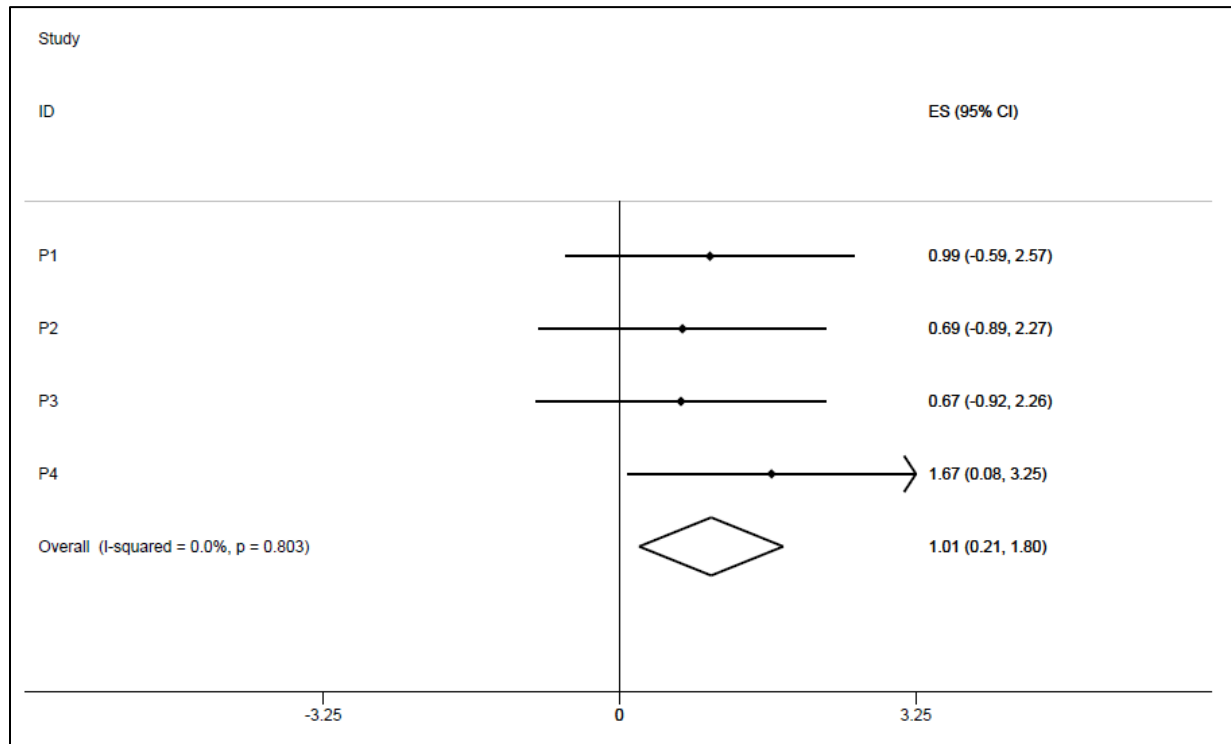

**Appendix Figure 16 Legend:** Data from this figure was extracted from the study published by Lipkin et al in 2017, which investigates the effect of with ephipherin and placebo and its effect on QMG score in patients with autoimmune myasthenia gravia. The average treatment effect is 1.01 (0.21 to 1.80).



**Appendix Figure 17: Children with mental retardation and fragmented sleep treated with melatonin and placebo and its effect on nights without awakening<sup>14</sup>**

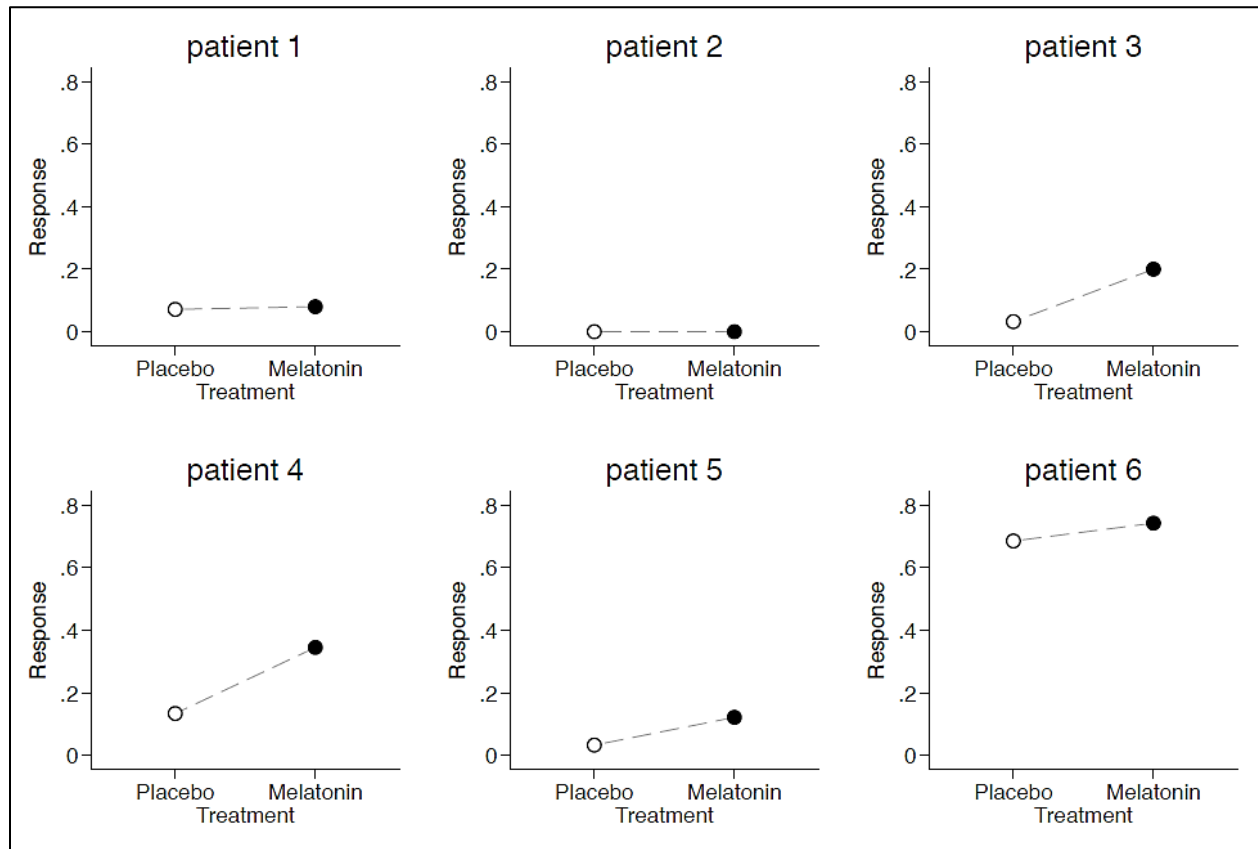

**Appendix Figure 17 Legend:** Data from this figure was extracted from the study published by Camfield et al in 1996, which investigates the effect of melatonin and placebo on nights without awakening in children with mental retardation and fragmented sleep. The average treatment effect is 0.84 (0.20 to 1.48). White circles indicate placebo; black circles indicate melatonin.

**Appendix Figure 18: Patients with traumatic spinal cord lesions treated with baclofen and placebo and its effect on anxiety<sup>15</sup>**

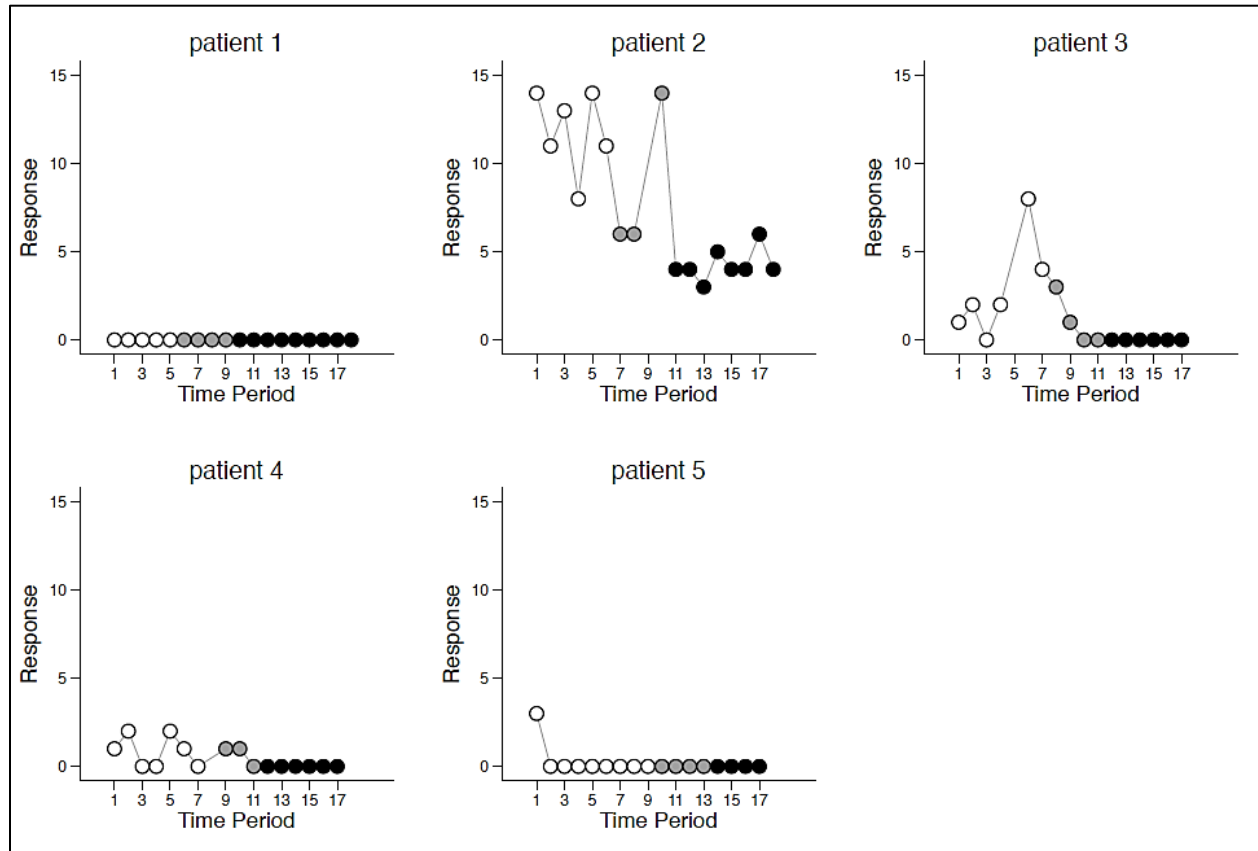

**Appendix Figure 18 Legend:** Data from this figure was extracted from the study published by Hinderer et al in 1990, which investigates the effect of baclofen and placebo on anxiety in patients with traumatic spinal cord lesions. The average treatment effect is -1.06 (-1.88 to -0.23). White circles indicate placebo; grey circles indicate a half dose (40 mg/day) of baclofen; black circles indicate a full dose (80 mg/day) of baclofen.

Appendix Figure 19: Children with gastroesophageal reflux treated with cisapride and placebo and its effect on emetic episodes per day<sup>16</sup>

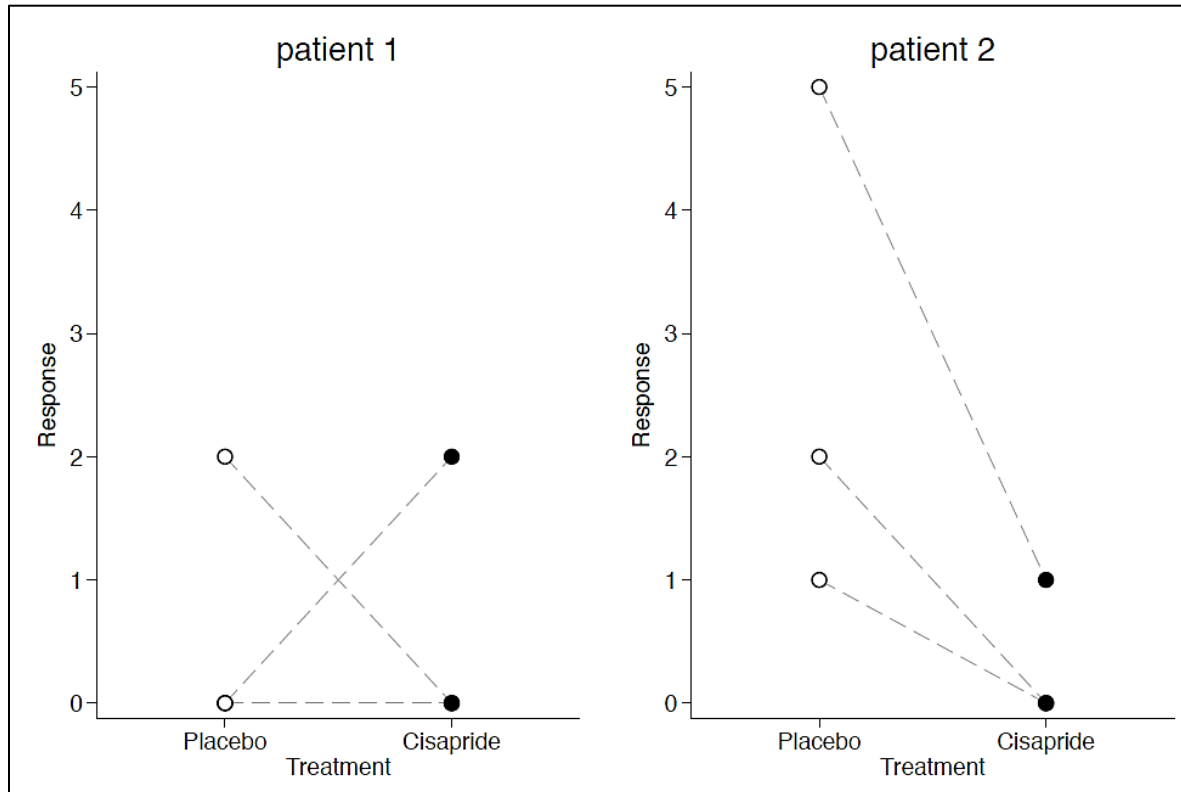

**Appendix Figure 19 Legend:** Data from this figure was extracted from the study published by Langer et al in 1993, which investigates the effect of cisapride and placebo on emetic episodes per day in children with gastroesophageal reflux. The average treatment effect is -1.20 (-2.49 to 0.09). White circles indicate placebo; black circles indicate cisapride.

Appendix Figure 20: Nonsmokers with ulcerative colitis treated with nicotine gum and placebo and its effect on abdominal pain<sup>17</sup>

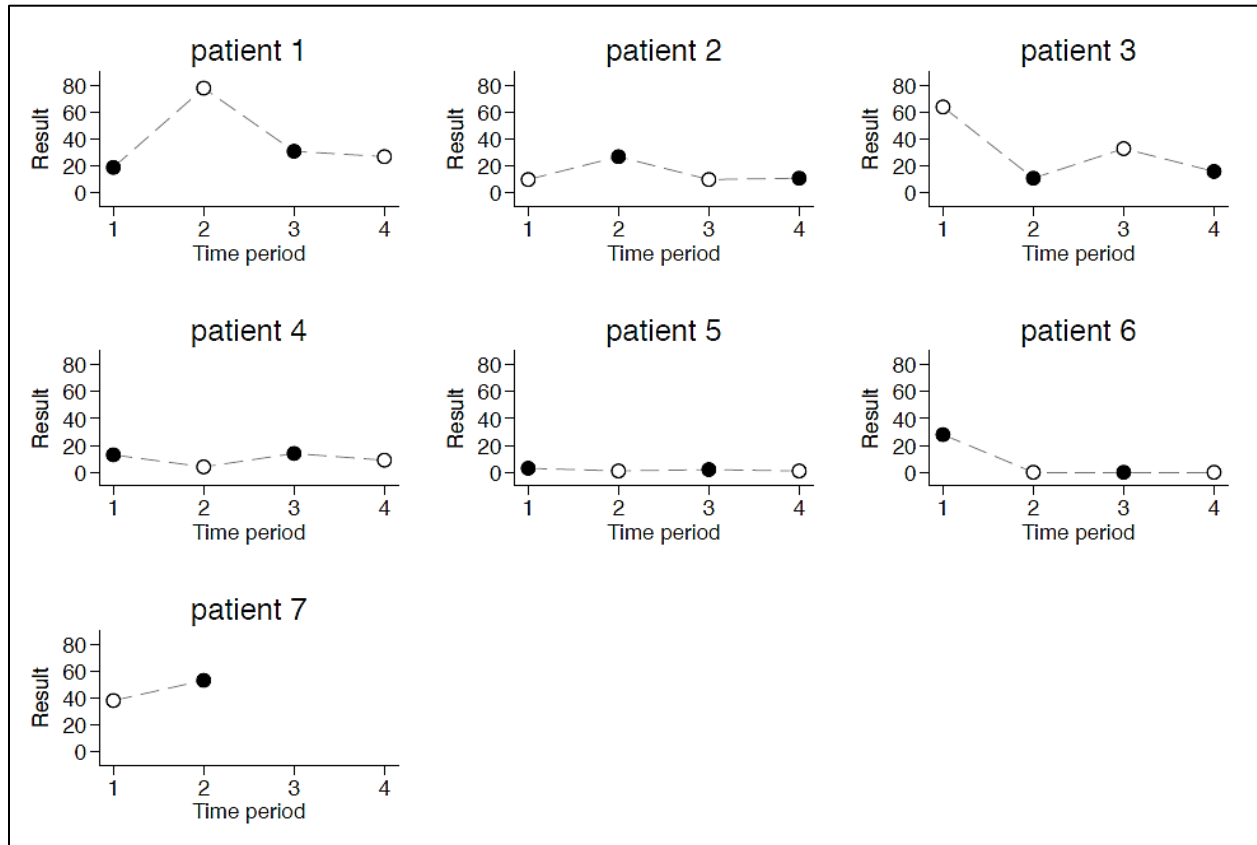

Appendix Figure 20 Legend: Data from this figure was extracted from the study published by Lashner et al in 1990, which investigates the effect of nicotine gum and placebo on abdominal pain in nonsmokers with ulcerative colitis. The average treatment effect is -3.62 (-15.84 to 8.61). White circles indicate placebo gum; black circles indicate nicotine gum.

Appendix Figure 21: Nonsmokers with ulcerative colitis treated with nicotine gum and placebo and its effect on bowel movements per day<sup>17</sup>

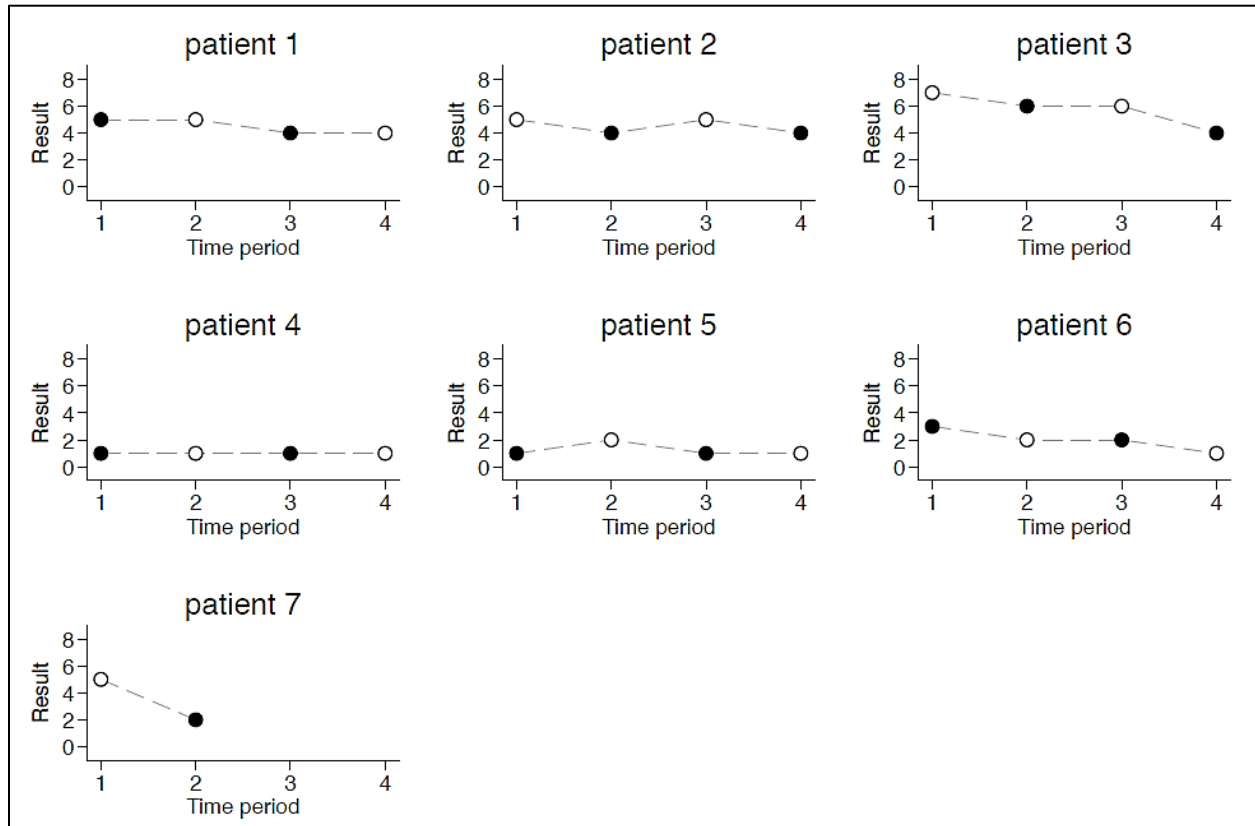

Appendix Figure 21 Legend: Data from this figure was extracted from the study published by Lashner et al in 1990, which investigates the effect of nicotine gum and placebo on bowel movements per day in nonsmokers with ulcerative colitis. The average treatment effect is -0.56 (-1.22 to 0.09). White circles indicate placebo gum; black circles indicate nicotine gum.

Appendix Figure 22: Nonsmokers with ulcerative colitis treated with nicotine gum and placebo and its effect on consistency of bowel movements<sup>17</sup>

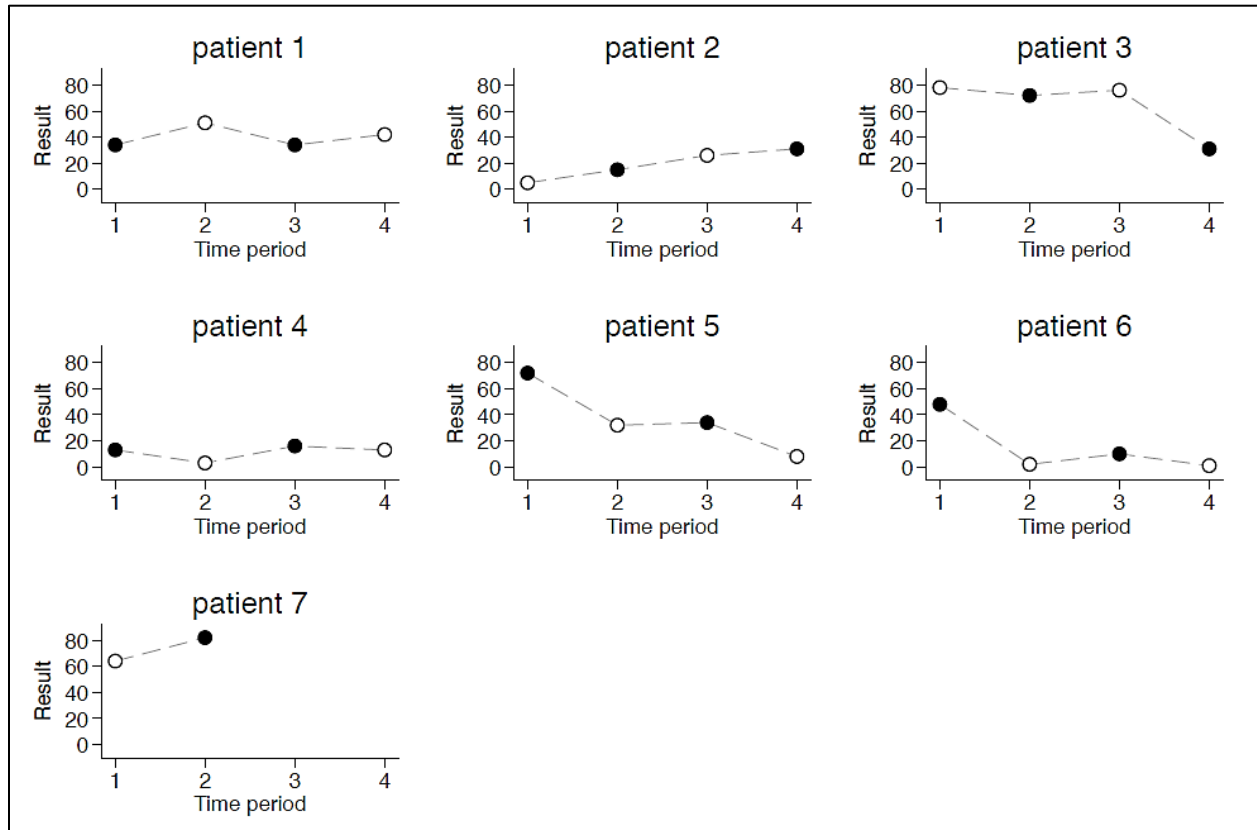

Appendix Figure 22 Legend: Data from this figure was extracted from the study published by Lashner et al in 1990, which investigates the effect of nicotine gum and placebo on consistency of bowel movements in nonsmokers with ulcerative colitis. The average treatment effect is 7.00 (-6.29 to 20.29). White circles indicate placebo gum; black circles indicate nicotine gum.

Appendix Figure 23: Nonsmokers with ulcerative colitis treated with nicotine gum and placebo and its effect on general sense of well-being<sup>17</sup>

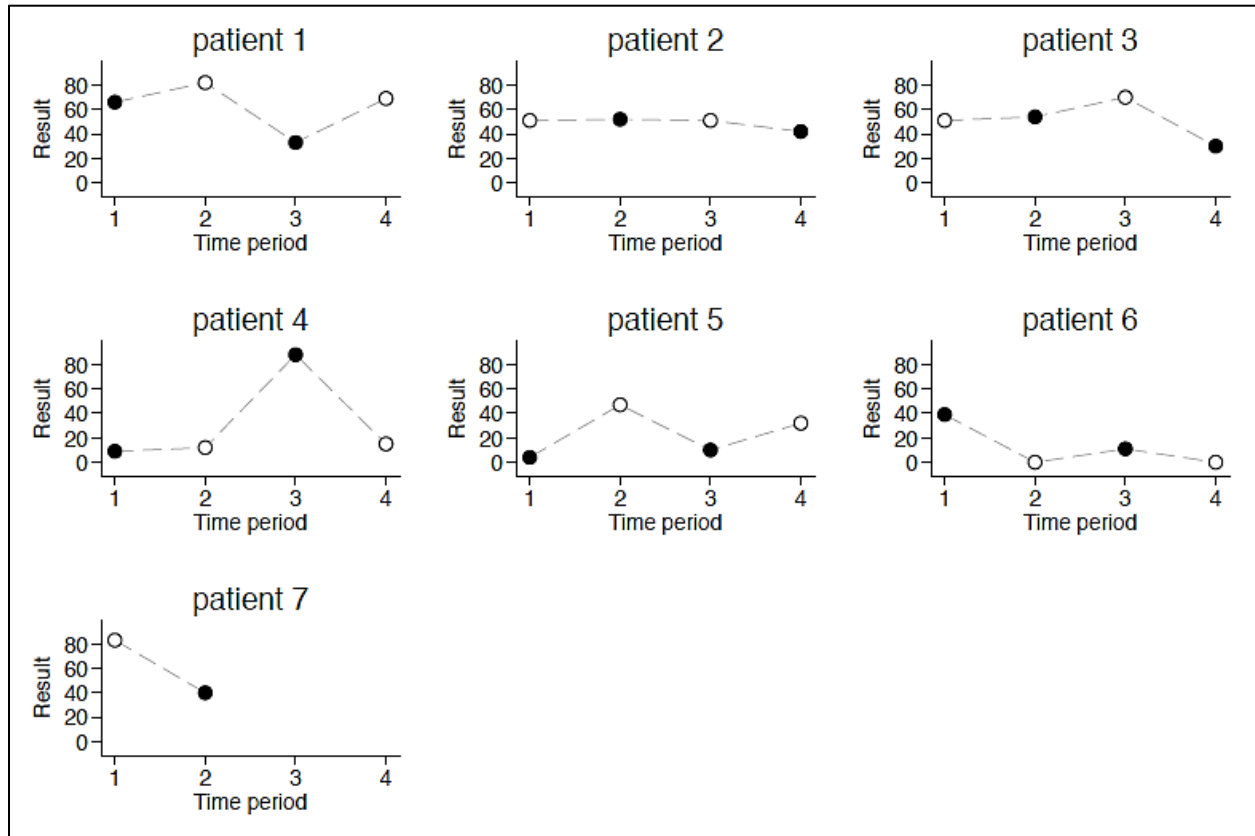

Appendix Figure 23 Legend: Data from this figure was extracted from the study published by Lashner et al in 1990, which investigates the effect of nicotine gum and placebo on general sense of well-being in nonsmokers with ulcerative colitis. The average treatment effect is -6.54 (-23.62 to 10.56). White circles indicate placebo gum; black circles indicate nicotine gum.

Appendix Figure 24: Nonsmokers with ulcerative colitis treated with nicotine gum and placebo and its effect on hematochezia<sup>17</sup>

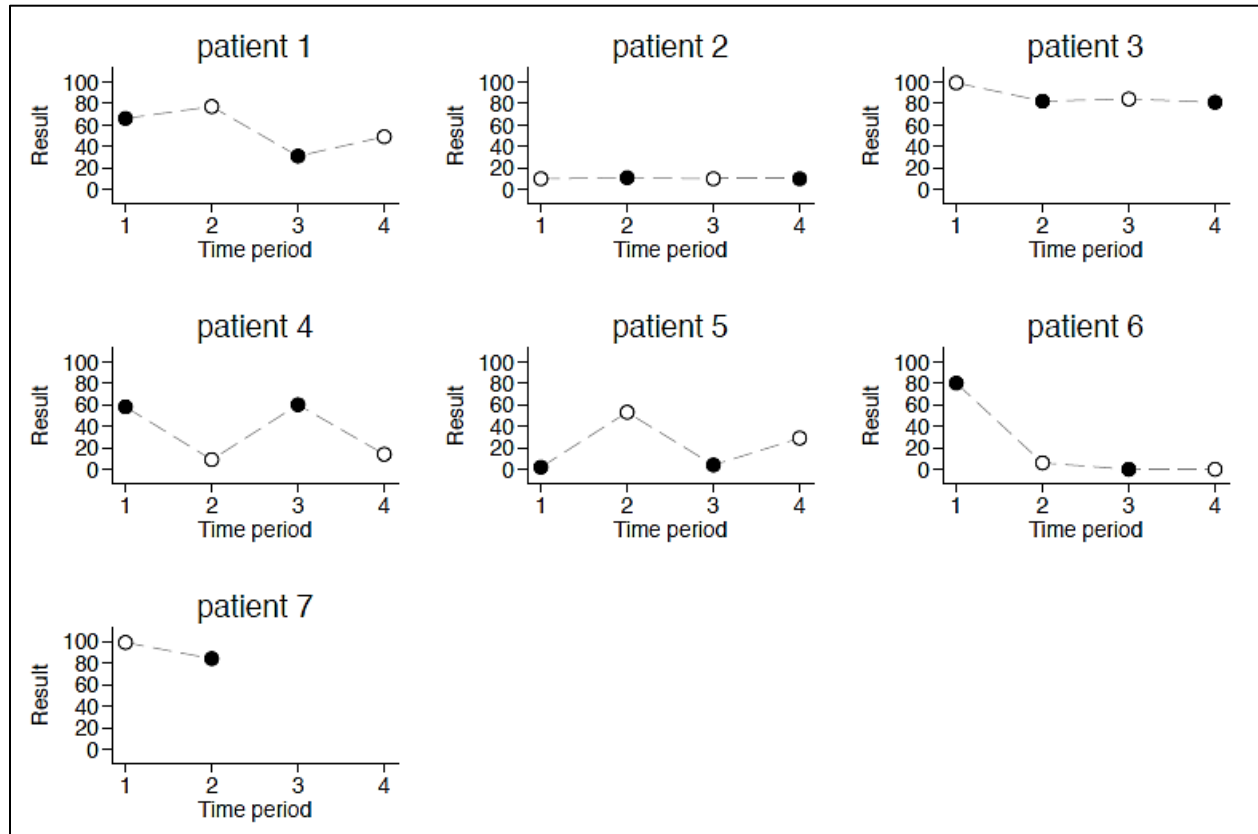

Appendix Figure 24 Legend: Data from this figure was extracted from the study published by Lashner et al in 1990, which investigates the effect of nicotine gum and placebo on hematochezia in nonsmokers with ulcerative colitis. The average treatment effect is 2.35 (-17.21 to 21.90). White circles indicate placebo gum; black circles indicate nicotine gum.



Appendix Figure 25: Patients with chronic depression and a diagnosis of major depression or dysthymia treated with sulpiride and placebo and its effect on anxiety<sup>18</sup>

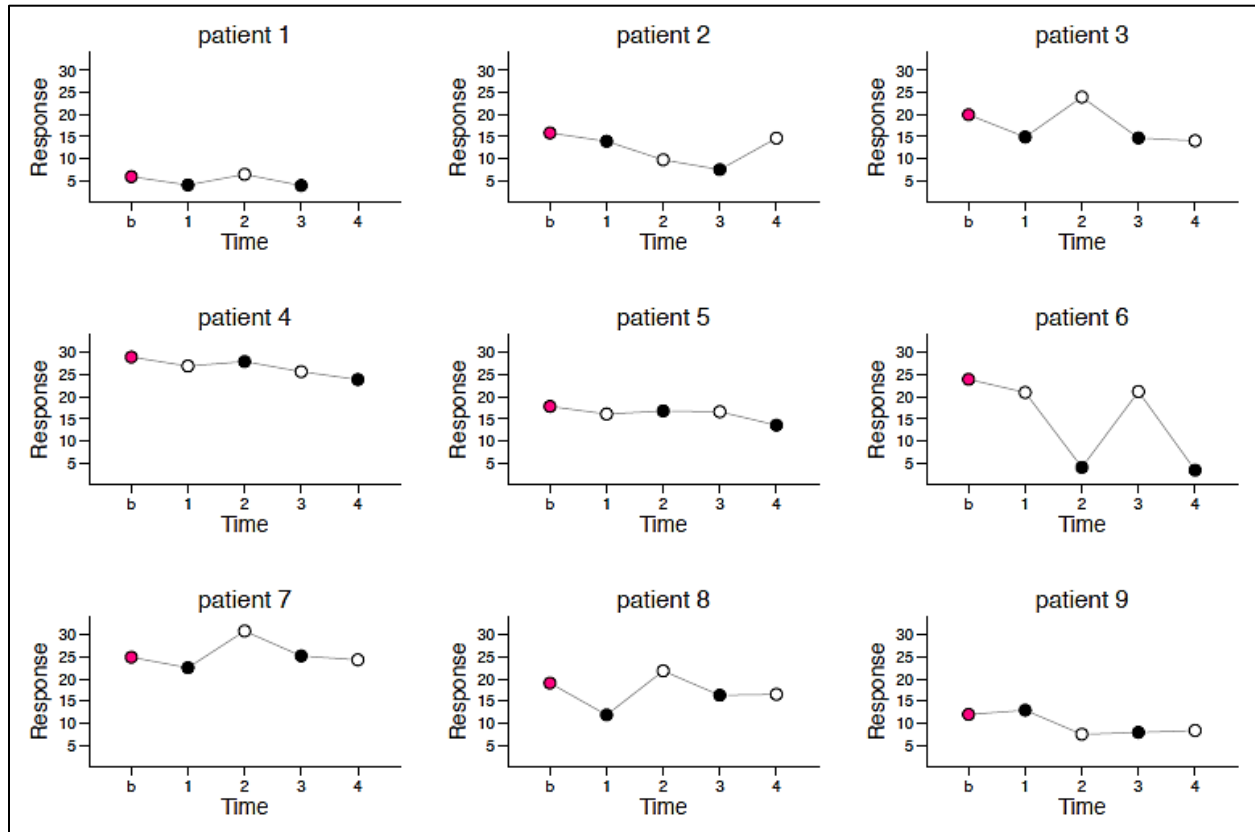

**Appendix Figure 25 Legend:** Data from this figure was extracted from the study published by Maier et al in 1994, which investigates the effect of sulpiride and placebo on anxiety in patients with chronic depression and a diagnosis of major depression or dysthymia. The average treatment effect is -3.81 (-7.22 to -0.40). Red circles indicate baseline; white circles indicate placebo; black circles indicate sulpiride.

**Appendix Figure 26: Patients with chronic depression and a diagnosis of major depression or dysthymia treated with sulpiride and placebo and its effect on depressed mood<sup>18</sup>**

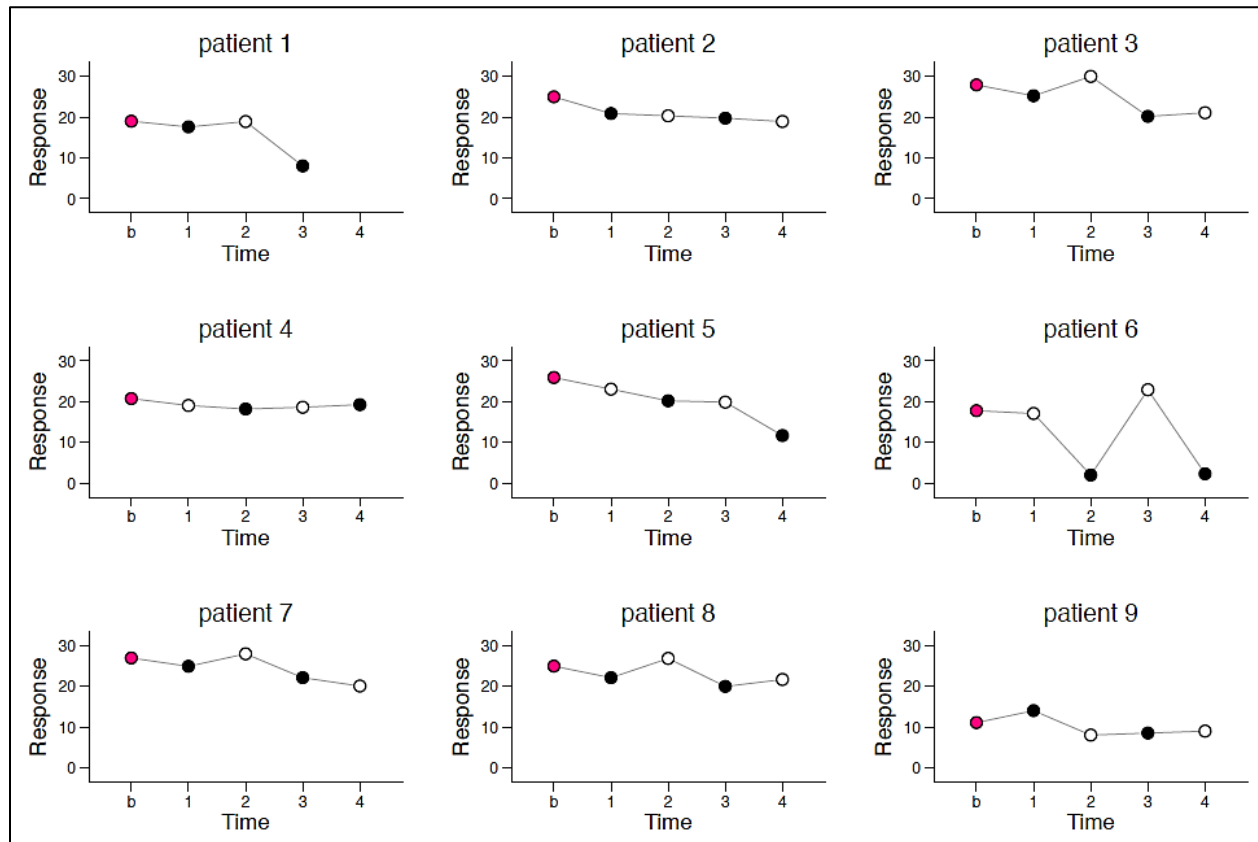

**Appendix Figure 26 Legend:** Data from this figure was extracted from the study published by Maier et al in 1994, which investigates the effect of sulpiride and placebo on depressed mood in patients with chronic depression and a diagnosis of major depression or dysthymia. The average treatment effect is -3.63 (-7.40 to 0.15). Red circles indicate baseline; white circles indicate placebo; black circles indicate sulpiride.

**Appendix Figure 27: Patients with chronic depression and a diagnosis of major depression or dysthymia treated with sulpiride and placebo and its effect on somatization<sup>18</sup>**

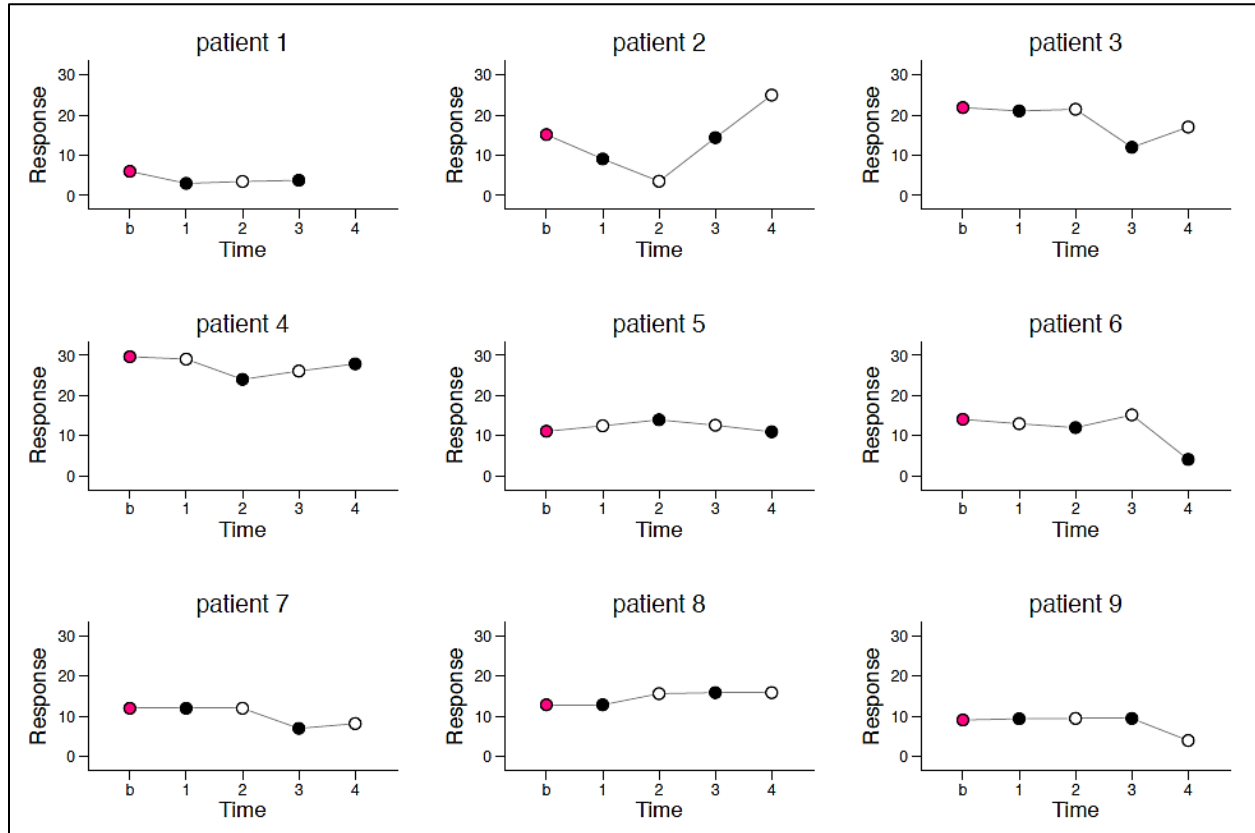

**Appendix Figure 27 Legend:** Data from this figure was extracted from the study published by Maier et al in 1994, which investigates the effect of sulpiride and placebo on somatization in patients with chronic depression and a diagnosis of major depression or dysthymia. The average treatment effect is -1.50 (-4.20 to 1.21). Red circles indicate baseline; white circles indicate placebo; black circles indicate sulpiride.

**Appendix Figure 28: Patients with ataxia from traumatic brain injury treated with ondansetron and placebo and its effect on lower extremity ataxia<sup>19</sup>**

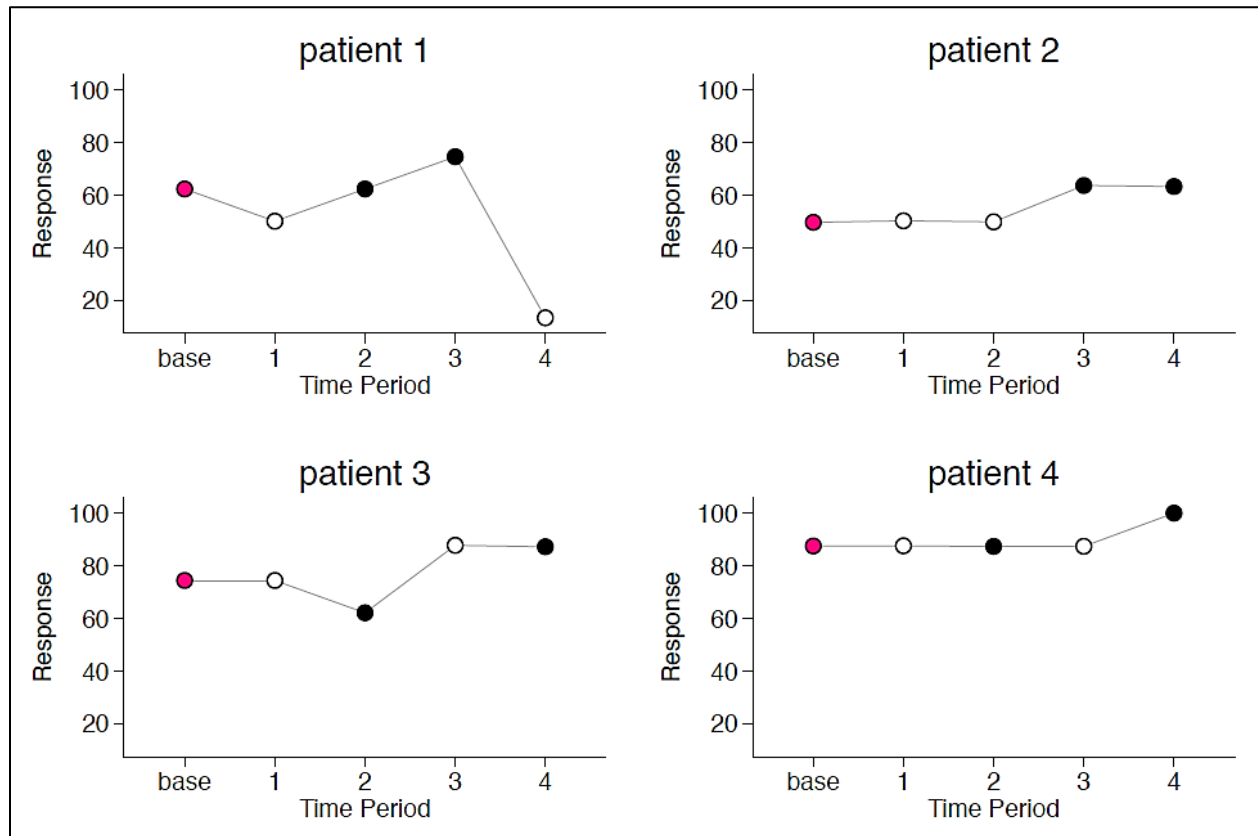

**Appendix Figure 28 Legend:** Data from this figure was extracted from the study published by Mandelcorn et al in 2004, which investigates the effect of ondansetron and placebo on lower extremity ataxia in patients with ataxia from traumatic brain injury. Each patient received the same treatment. The average treatment effect is 12.49 (-0.85 to 25.84). Red circles indicate baseline; white circles indicate placebo; black circles indicate ondansetron.

**Appendix Figure 29: Patients with ataxia from traumatic brain injury treated with ondansetron and placebo and its effect on self-assessment score<sup>19</sup>**

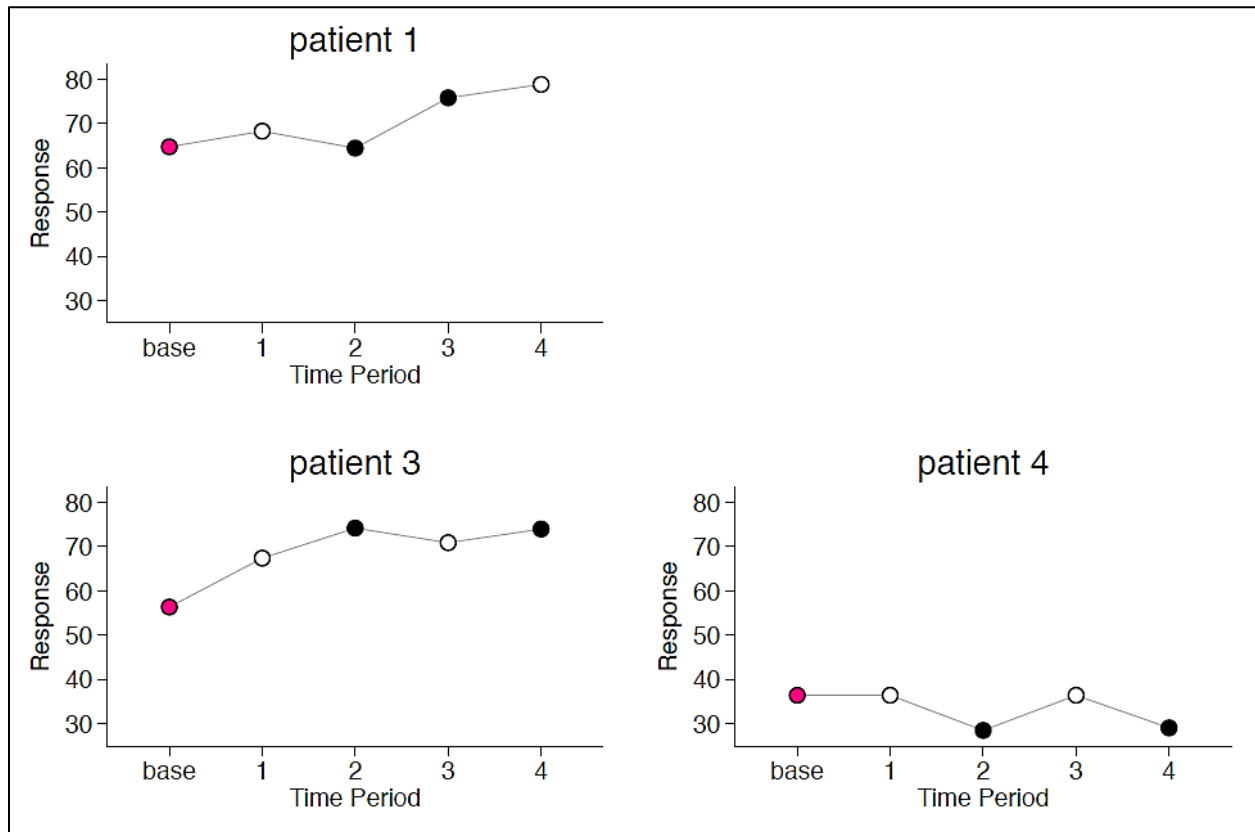

**Appendix Figure 29 Legend:** Data from this figure was extracted from the study published by Mandelcorn et al in 2004, which investigates the effect of ondansetron and placebo on self-assessment score in patients with ataxia from traumatic brain injury. The average treatment effect is -2.05 (-8.43 to 4.33). Red circles indicate baseline; white circles indicate placebo; black circles indicate ondansetron.

**Appendix Figure 30: Patients with ataxia from traumatic brain injury treated with ondansetron and placebo and its effect on truncal ataxia<sup>19</sup>**

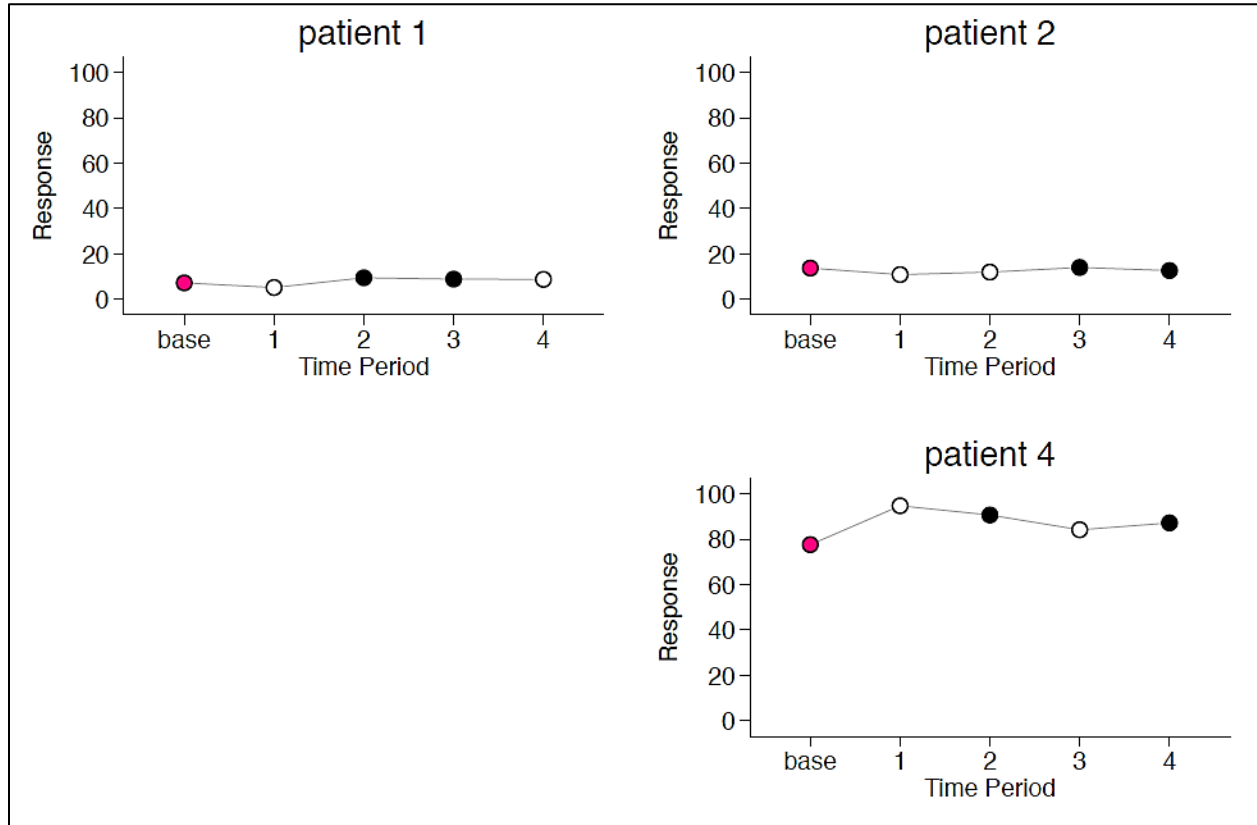

**Appendix Figure 30 Legend:** Data from this figure was extracted from the study published by Mandelcorn et al in 2004, which investigates the effect of ondansetron and placebo on truncal ataxia in patients with ataxia from traumatic brain injury. The average treatment effect is 1.20 (-2.06 to 4.45). Red circles indicate baseline; white circles indicate placebo; black circles indicate ondansetron.

**Appendix Figure 31: Patients with ataxia from traumatic brain injury treated with ondansetron and placebo and its effect on upper extremity ataxia<sup>19</sup>**

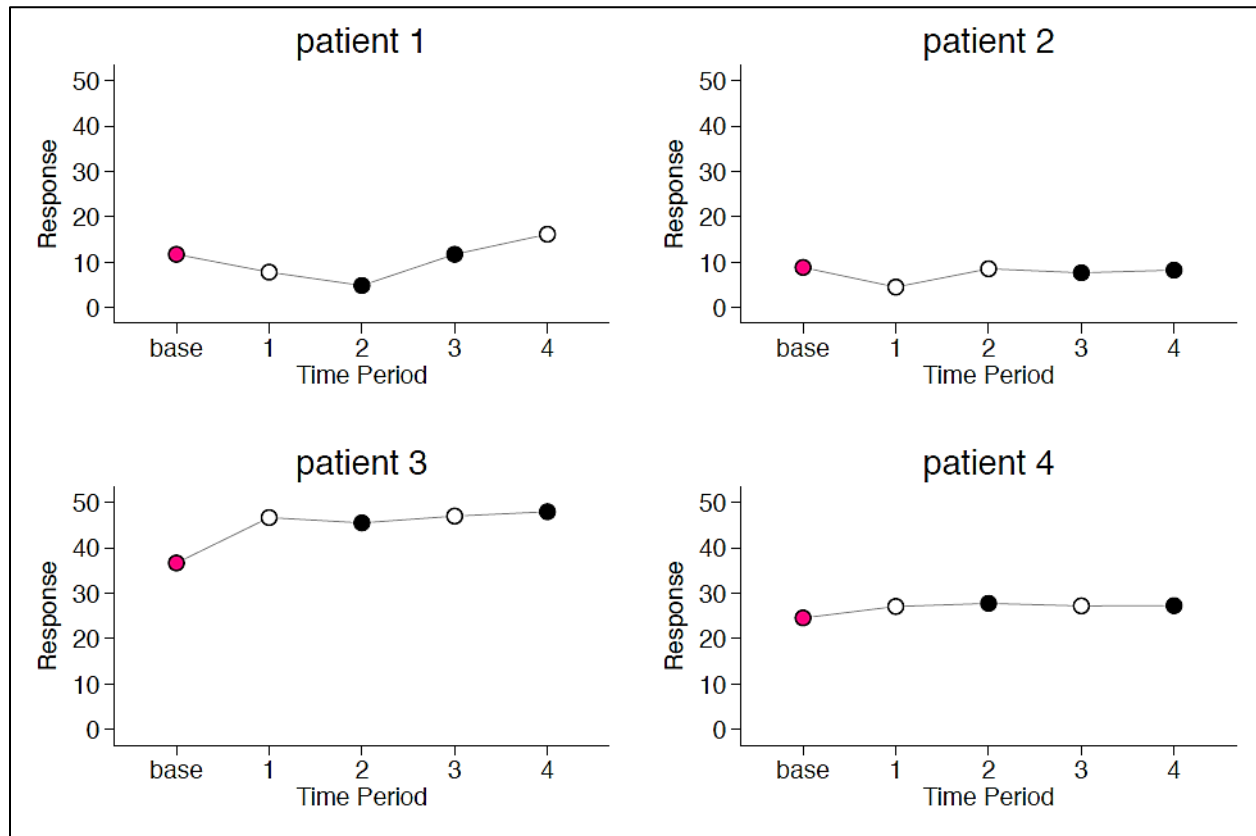

**Appendix Figure 31 Legend:** Data from this figure was extracted from the study published by Mandelcorn et al in 2004, which investigates the effect of ondansetron and placebo on upper extremity ataxia in patients with ataxia from traumatic brain injury. The average treatment effect is -0.50 (-3.10 to 2.10). Red circles indicate baseline; white circles indicate placebo; black circles indicate ondansetron.

**Appendix Figure 32: Patients with chronic neuropathic pain treated with oral dextromethorphan and placebo and its effect on VAS pain intensity<sup>20</sup>**

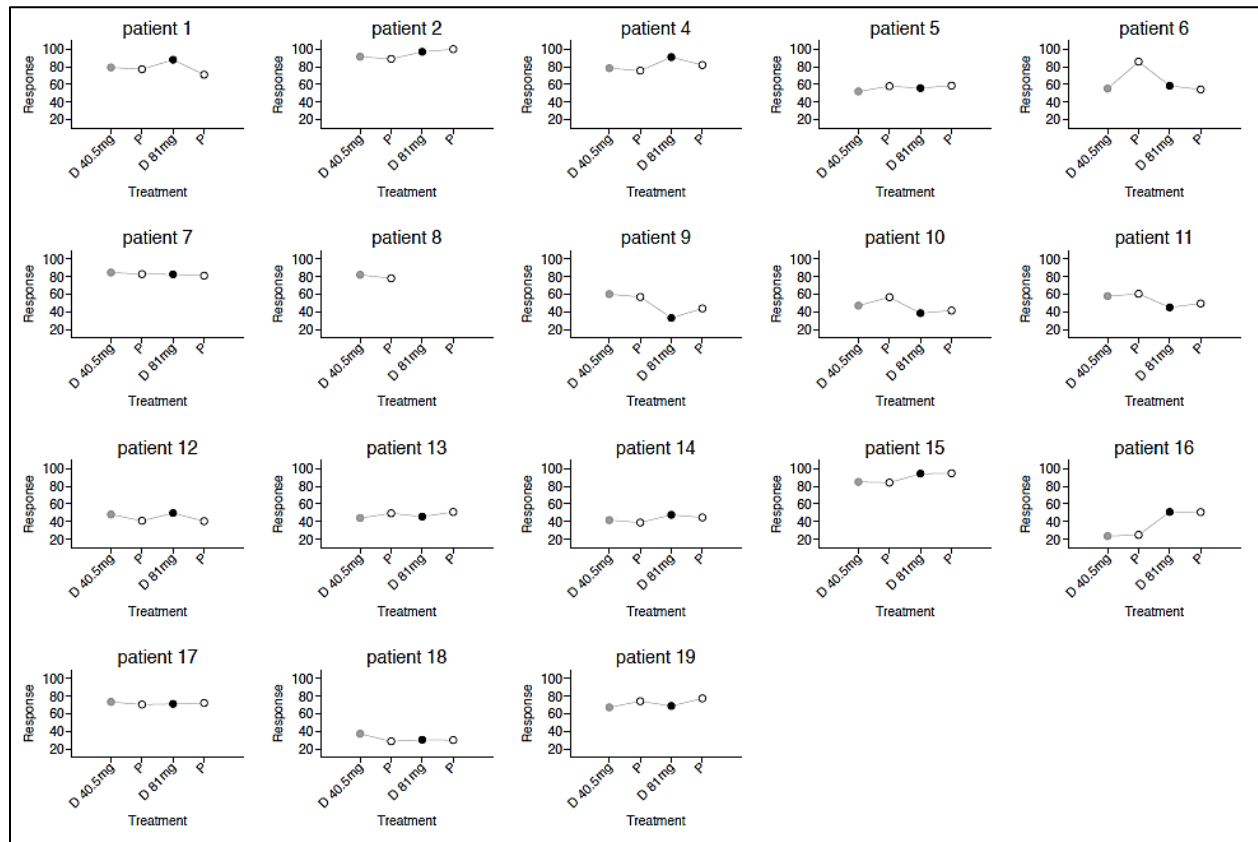

**Appendix Figure 32 Legend:** Data from this figure was extracted from the study published by McQuay et al in 1994, which investigates the effect of oral dextromethorphan and placebo on VAS pain intensity in patients with chronic neuropathic pain. The average treatment effect is -1.06 (-5.16 to 3.04). Grey circles indicate dextromethorphan 40.5 mg daily; black circles indicate dextromethorphan 81 mg daily; white circles indicate placebo.



**Appendix Figure 33: Patients with chronic neuropathic pain treated with oral dextromethorphan and placebo and its effect on VAS relief intensity<sup>20</sup>**

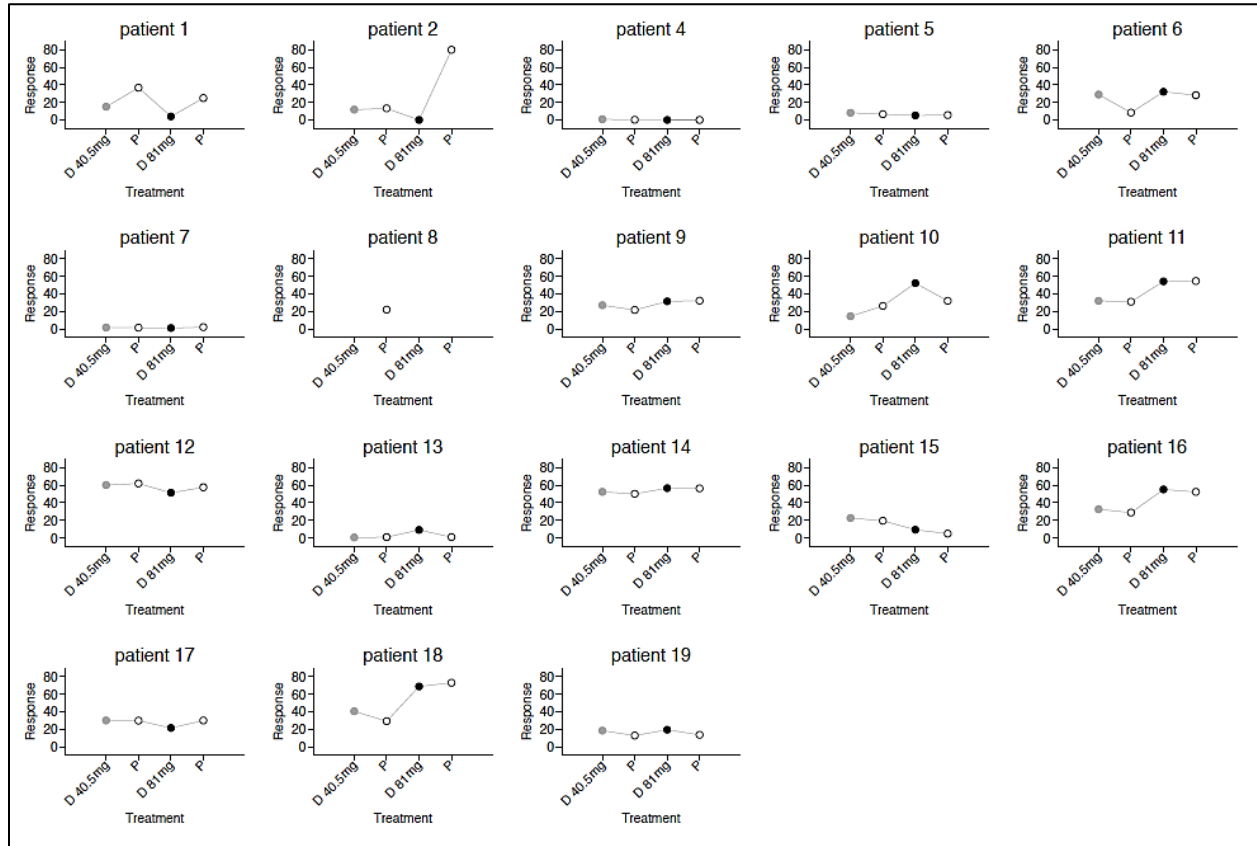

**Appendix Figure 33 Legend:** Data from this figure was extracted from the study published by McQuay et al in 1994, which investigates the effect of oral dextromethorphan and placebo on VAS relief intensity in patients with chronic neuropathic pain. The average treatment effect is -3.86 (-11.11 to 3.40). Grey circles indicate dextromethorphan 40.5 mg daily; black circles indicate dextromethorphan 81 mg daily; white circles indicate placebo.

**Appendix Figure 34: Patients with unstable angina at rest treated with continuous and intermittent injection of isosorbide dinitrate and its effect on incidence of angina<sup>21</sup>**

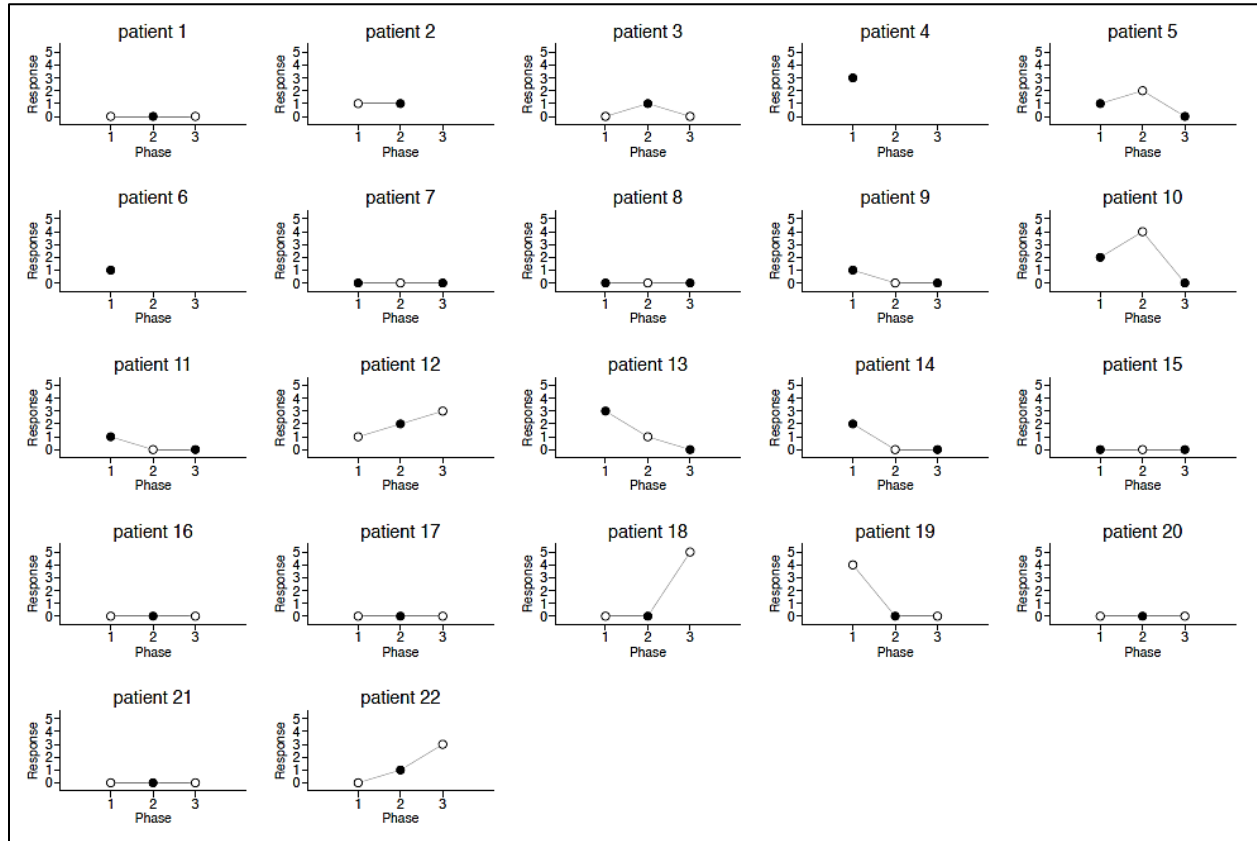

**Appendix Figure 34 Legend:** Data from this figure was extracted from the study published by Miyazaki et al in 1995, which investigates the effect of continuous and intermittent injection of isosorbide dinitrate on incidence of angina in patients with unstable angina. The average treatment effect is 0.47 (-0.32 to 1.26). White circles indicate continuous injection; black circles indicate intermittent injection.

**Appendix Figure 35: Children with brain tumors receiving highly emetogenic therapy treated with ondansetron/metopimazine and ondansetron monotherapy and its effect on emetic episodes per day<sup>22</sup>**

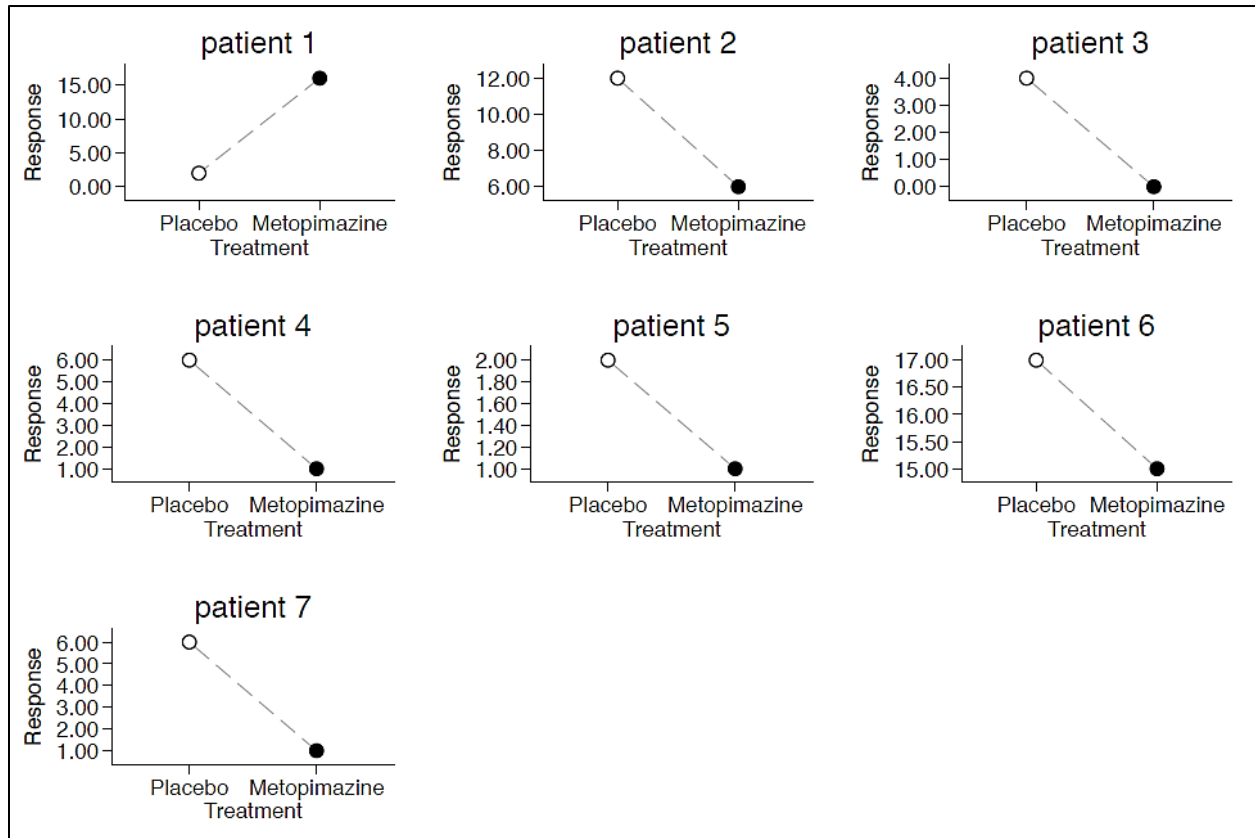

**Appendix Figure 35 Legend:** Data from this figure was extracted from the study published by Nathan et al in 2006, which investigates the effect of ondansetron/metopimazine and ondansetron monotherapy on emetic episodes per day in children with brain tumors receiving highly emetogenic therapy. The average treatment effect is -0.56 (-1.74 to 0.62). White circles indicate placebo; black circles indicate metopimazine.

**Appendix Figure 36: Patients with unstable angina at rest treated with oral verapamil and placebo and its effect on ischemic attacks<sup>23</sup>**

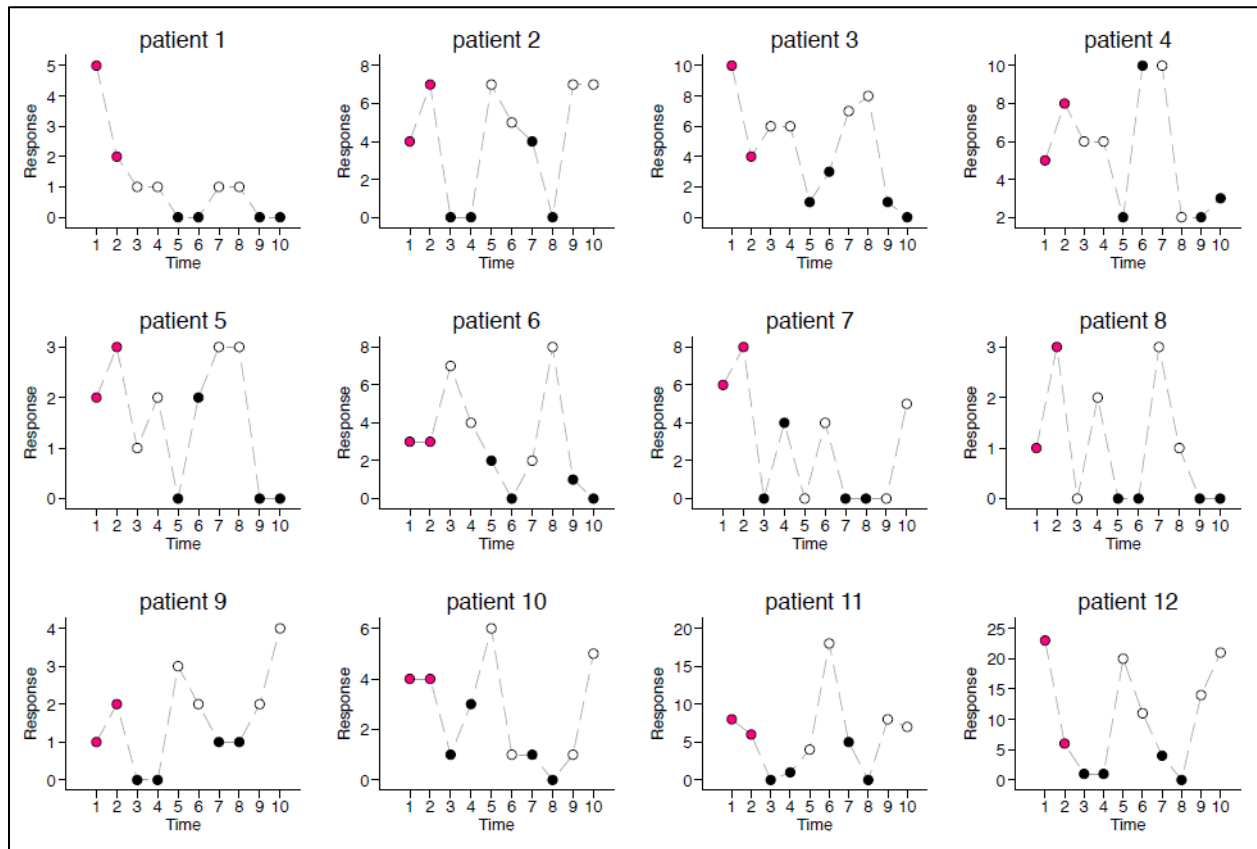

**Appendix Figure 36 Legend:** Data from this figure was extracted from the study published by Parodi et al in 1979, which investigates the effect of oral verapamil and placebo on ischemic attacks in patients with unstable angina. The average treatment effect is -1.63 (-2.10 to -1.17). Red circles indicate baseline; white circles indicate placebo; black circles indicate verapamil.

**Appendix Figure 37: Patients with unstable angina at rest treated with verapamil, propranolol and placebo and its effect on asymptomatic ST depression<sup>24</sup>**

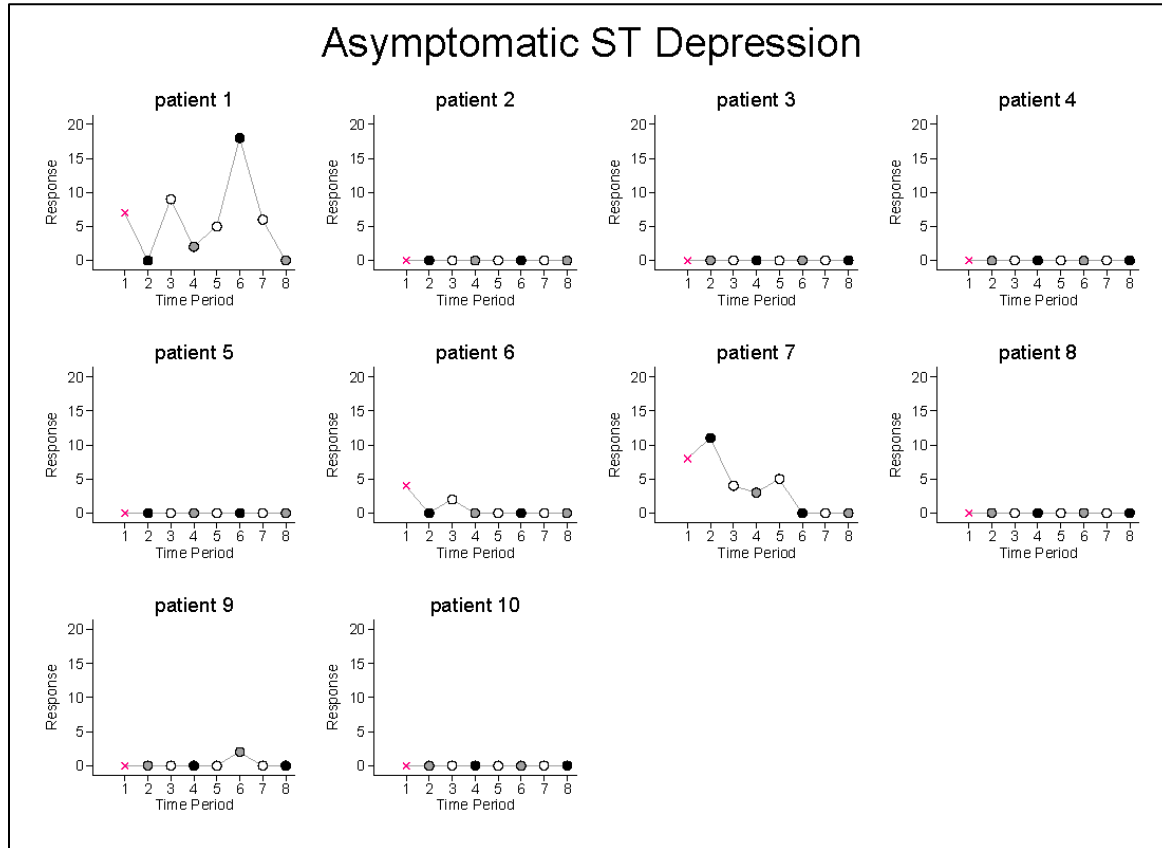

**Appendix Figure 37 Legend:** Data from this figure was extracted from the study published by Parodi et al in 1986, which investigates the effect of verapamil, propranolol and placebo on asymptomatic ST depression in patients with unstable angina. The average treatment effect is -0.82 (-2.54 to 0.90). Red Xs indicate baseline; white circles indicate placebo; grey circles indicate propranolol; black circles indicate verapamil.

**Appendix Figure 38: Patients with unstable angina at rest treated with verapamil, propranolol and placebo and its effect on asymptomatic ST elevation<sup>24</sup>**

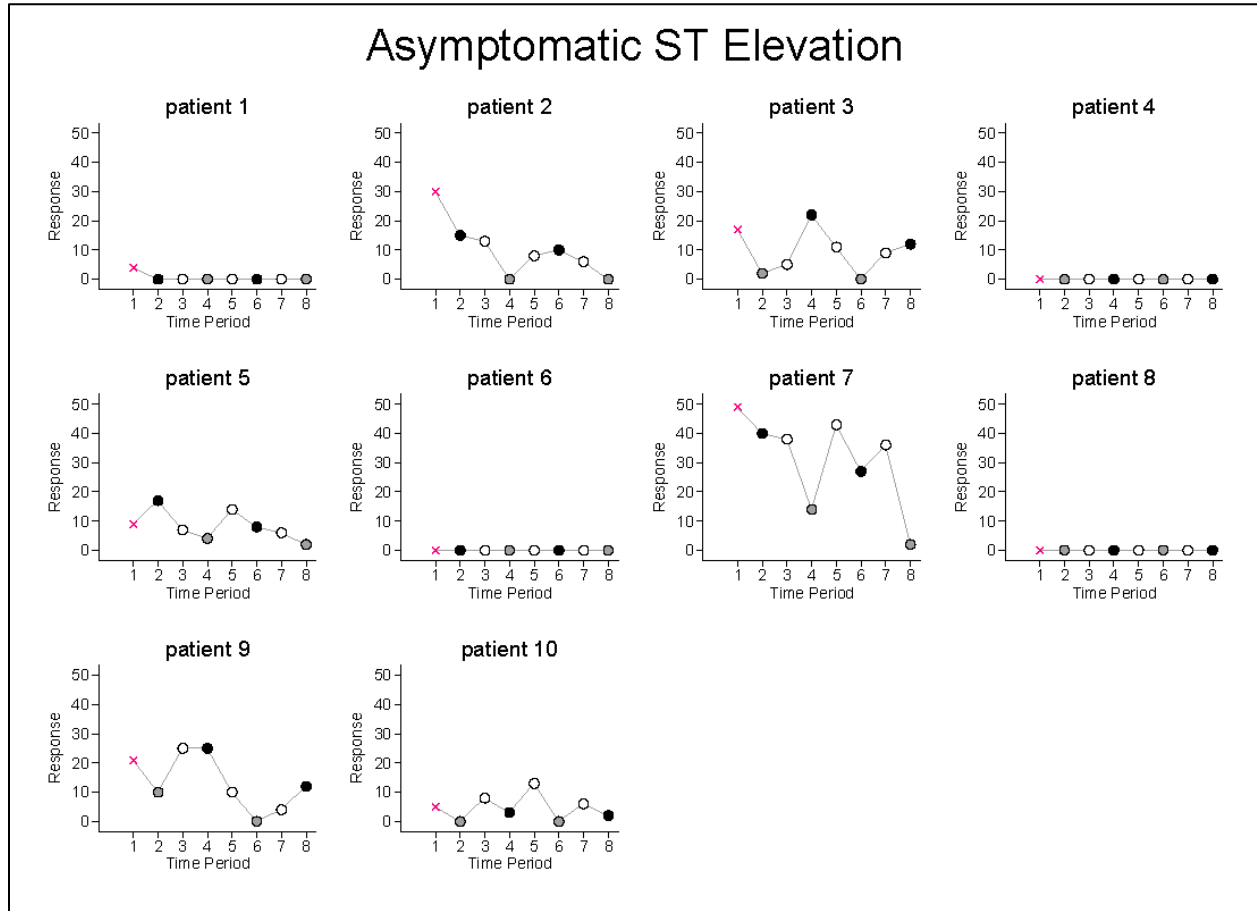

**Appendix Figure 38 Legend:** Data from this figure was extracted from the study published by Parodi et al in 1986, which investigates the effect of verapamil, propranolol and placebo on asymptomatic ST elevation in patients with unstable angina. The average treatment effect is -1.97 (-2.92 to -1.01). Red Xs indicate baseline; white circles indicate placebo; grey circles indicate propranolol; black circles indicate verapamil.

**Appendix Figure 39: Patients with unstable angina at rest treated with verapamil, propranolol and placebo and its effect on symptomatic ST depression<sup>24</sup>**

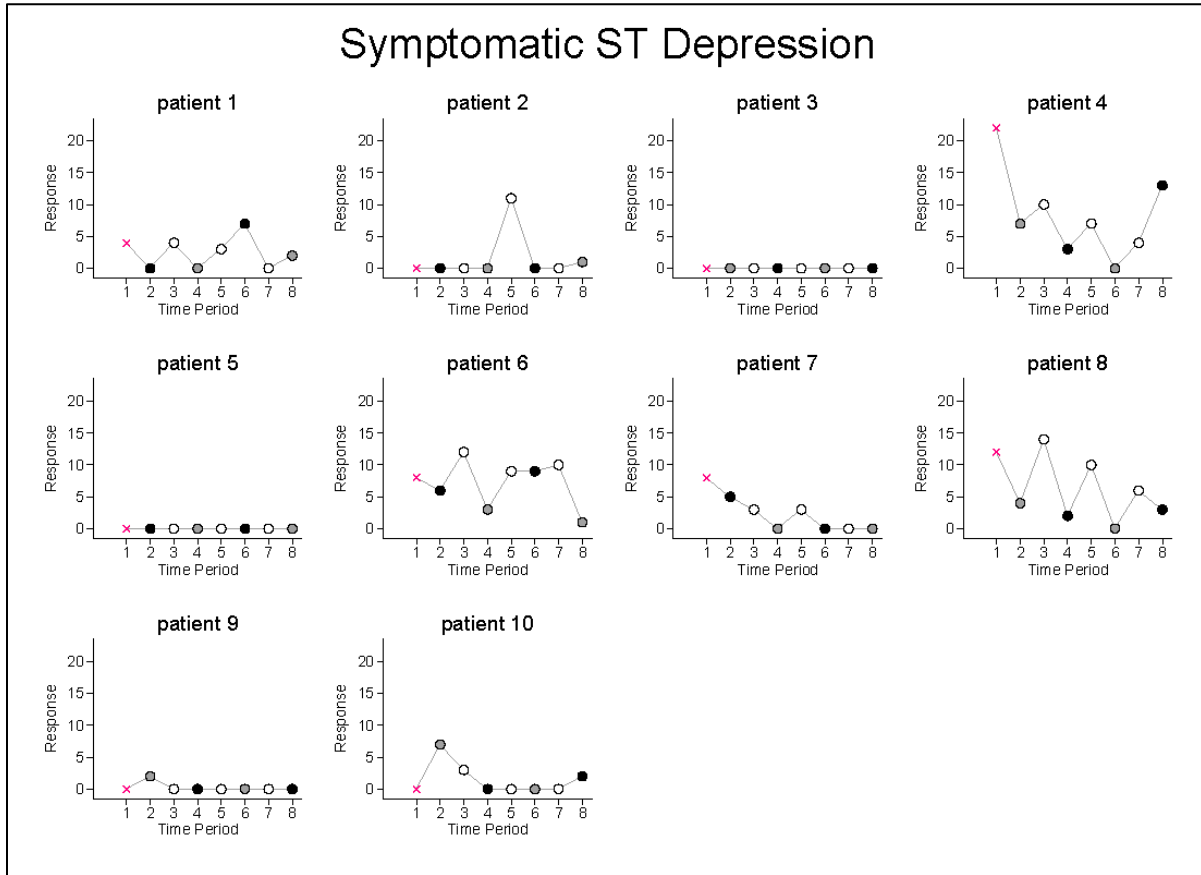

**Appendix Figure 39 Legend:** Data from this figure was extracted from the study published by Parodi et al in 1986, which investigates the effect of verapamil, propranolol and placebo on symptomatic ST depression in patients with unstable angina. The average treatment effect is -0.98 (-1.84 to -0.13). Red Xs indicate baseline; white circles indicate placebo; grey circles indicate propranolol; black circles indicate verapamil.

**Appendix Figure 40: Patients with unstable angina at rest treated with verapamil, propranolol and placebo and its effect on symptomatic ST elevation<sup>24</sup>**

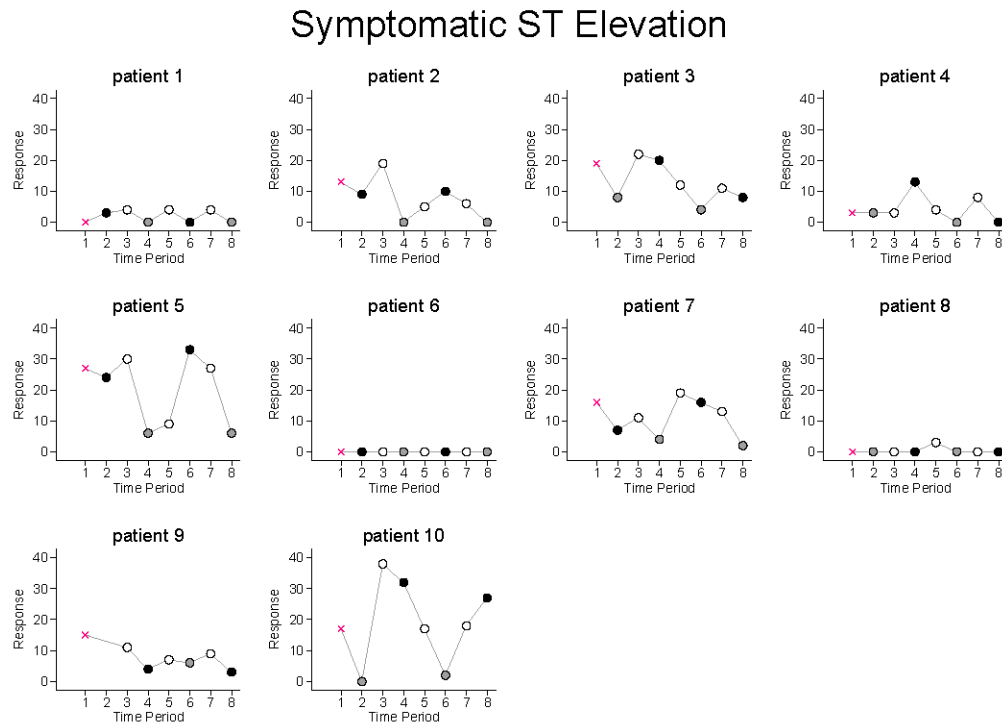

**Appendix Figure 40 Legend:** Data from this figure was extracted from the study published by Parodi et al in 1986, which investigates the effect of verapamil, propranolol and placebo on symptomatic ST elevation in patients with unstable angina. The average treatment effect is -1.87 (-2.72 to -1.02). Red Xs indicate baseline; white circles indicate placebo; grey circles indicate propranolol; black circles indicate verapamil.



**Appendix Figure 41: Patients previously taking warfarin for either atrial fibrillation or deep vein thrombosis treated with apo-warfarin and coumadin and its effect on international normalized ratio<sup>8</sup>**

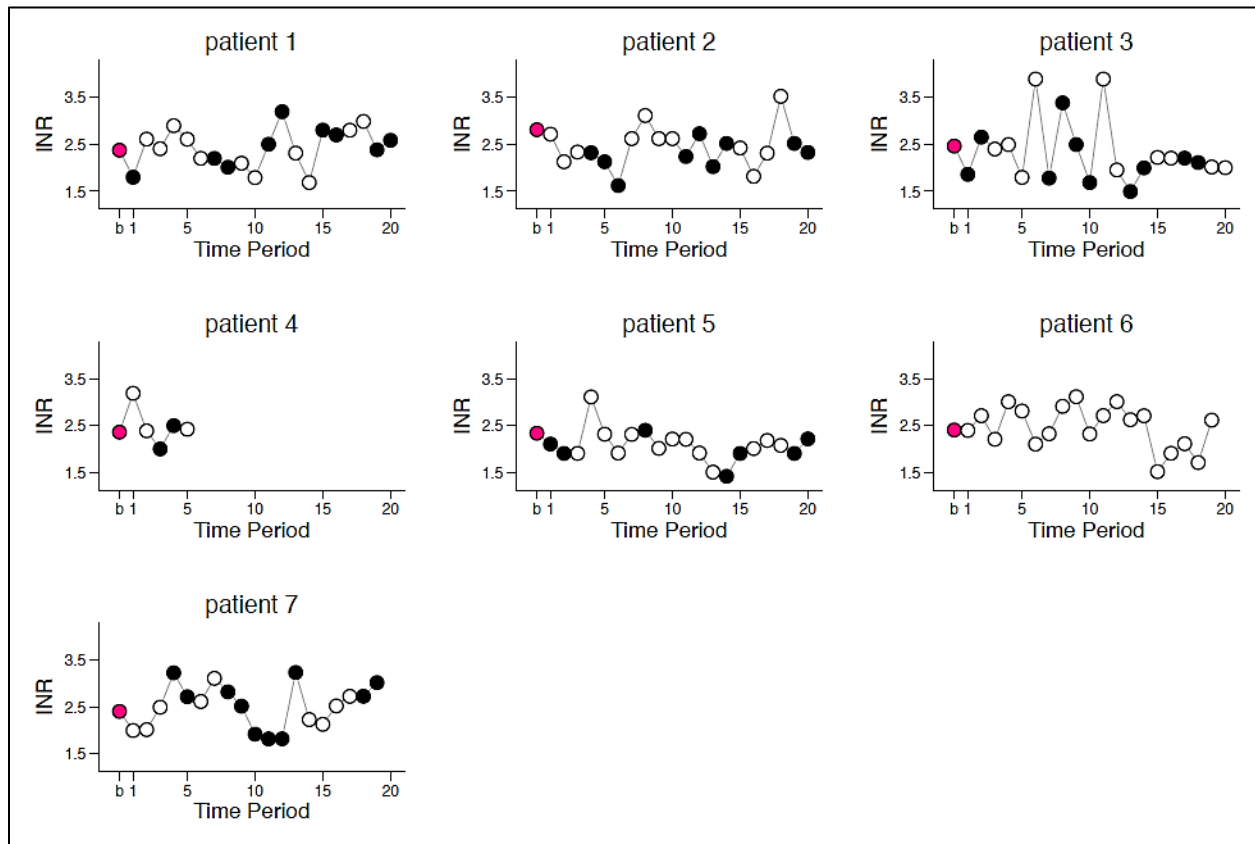

**Appendix Figure 41 Legend:** Data from this figure was extracted from the study published by Pereira et al in 1995, which investigates the effect of apo-warfarin and coumadin on international normalized ratio in patients previously taking warfarin for either atrial fibrillation or deep vein thrombosis. The average treatment effect is  $-0.12$  ( $-0.30$  to  $0.07$ ). Red circles indicate baseline; white circles indicate Coumadin; black circles indicate apo-warfarin.

**Appendix Figure 42: Parkinson's disease patients with troublesome dyskinesia treated with simvastatin and placebo and its effect on discomfort caused by troublesome dyskinesia<sup>25</sup>**

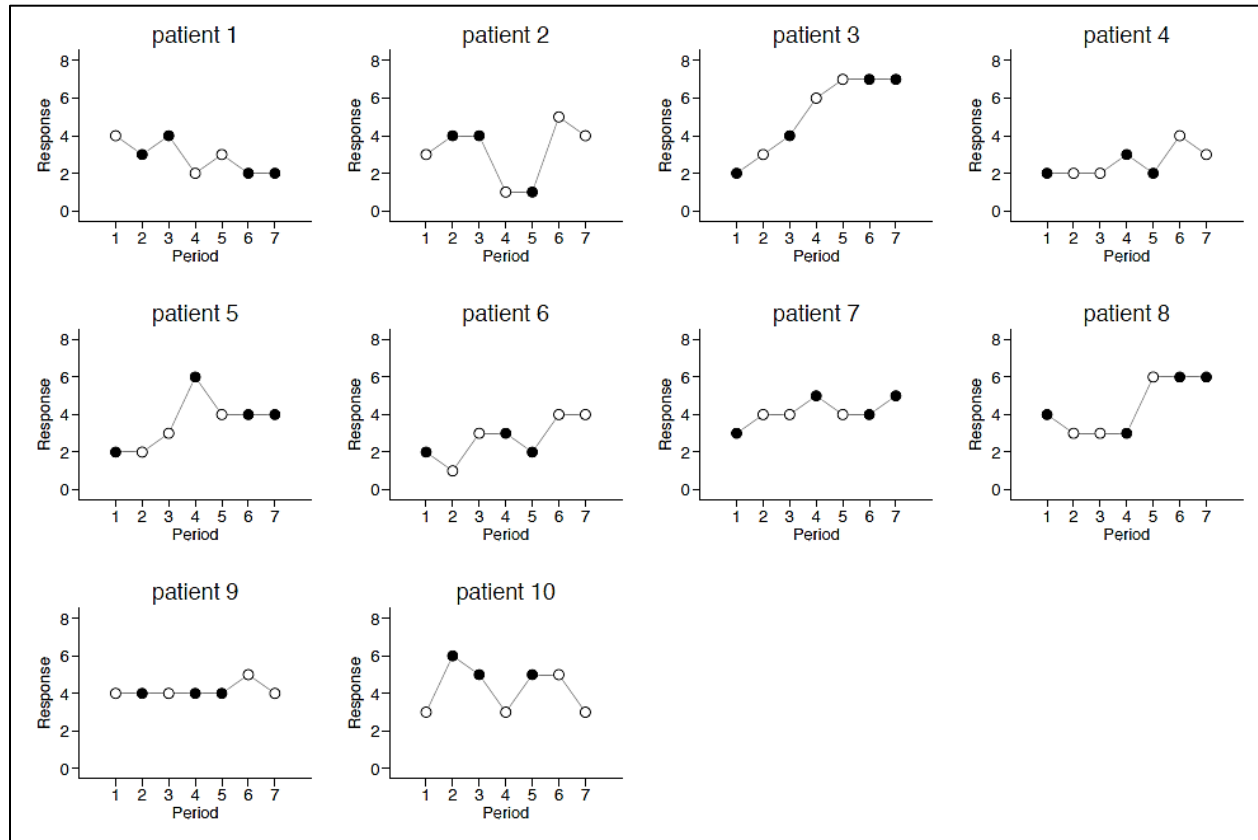

**Appendix Figure 42 Legend:** Data from this figure was extracted from the study published by Tison et al in 2012, which investigates the effect of simvastatin and placebo on discomfort caused by troublesome dyskinesia in Parkinson's disease patients with troublesome dyskinesia. The average treatment effect is 0.20 (-0.40 to 0.80). White circles indicate placebo; black circles indicate simvastatin.

## Appendix Reference List

- (1) Emmanuel AV, Kamm MA, Roy AJ, Kerstens R, Vandeplassche L. Randomised clinical trial: the efficacy of prucalopride in patients with chronic intestinal pseudo-obstruction--a double-blind, placebo-controlled, cross-over, multiple n = 1 study. *Aliment Pharmacol Ther* 2012; 35(1):48-55.
- (2) Haas DC, Sheehe PR. Dextroamphetamine pilot crossover trials and n of 1 trials in patients with chronic tension-type and migraine headache. *Headache* 2004; 44(10):1029-1037.
- (3) Jaeschke R, Adachi J, Guyatt G, Keller J, Wong B. Clinical usefulness of amitriptyline in fibromyalgia: the results of 23 N-of-1 randomized controlled trials. *J Rheumatol* 1991; 18(3):447-451.
- (4) Johannessen T, Petersen H, Kristensen P, Fosstvedt D, Kleveland PM, Dybdahl J et al. Cimetidine on-demand in dyspepsia. Experience with randomized controlled single-subject trials. *Scand J Gastroenterol* 1992; 27(3):189-195.
- (5) Mahon J, Laupacis A, Donner A, Wood T. Randomised study of n of 1 trials versus standard practice. *BMJ* 1996; 312(7038):1069-1074.
- (6) March L, Irwig L, Schwarz J, Simpson J, Chock C, Brooks P. n of 1 trials comparing a non-steroidal anti-inflammatory drug with paracetamol in osteoarthritis. *BMJ* 1994; 309(6961):1041-1045.
- (7) Patel A, Jaeschke R, Guyatt GH, Keller JL, Newhouse MT. Clinical usefulness of n-of-1 randomized controlled trials in patients with nonreversible chronic airflow limitation. *Am Rev Respir Dis* 1991; 144(4):962-964.
- (8) Pereira JA, Holbrook AM, Dolovich L, Goldsmith C, Thabane L, Douketis JD et al. Are brand-name and generic warfarin interchangeable? Multiple n-of-1 randomized, crossover trials. *Ann Pharmacother* 2005; 39(7-8):1188-1193.
- (9) Wallace AE, Kofoed LL. Statistical analysis of single case studies in the clinical setting: the example of methylphenidate trials in children with attention-deficit hyperactivity disorder. *J Child Adolesc Psychopharmacol* 1994; 4(3):141-150.
- (10) Woodfield R, Goodyear-Smith F, Arroll B. N-of-1 trials of quinine efficacy in skeletal muscle cramps of the leg. *Br J Gen Pract* 2005; 55(512):181-185.
- (11) Zucker DR, Ruthazer R, Schmid CH, Feuer JM, Fischer PA, Kieval RI et al. Lessons learned combining N-of-1 trials to assess fibromyalgia therapies. *J Rheumatol* 2006; 33(10):2069-2077.
- (12) Joy TR, Monjed A, Zou GY, Hegele RA, McDonald CG, Mahon JL. N-of-1 (single-patient) trials for statin-related myalgia. *Ann Intern Med* 2014; 160(5):301-310.
- (13) Lipka AF, Vrinten C, van Zwet EW, Schimmel KJ, Cornel MC, Kuijpers MR et al. Ephedrine treatment for autoimmune myasthenia gravis. *Neuromuscul Disord* 2017; 27(3):259-265.
- (14) Camfield P, Gordon K, Dooley J, Camfield C. Melatonin appears ineffective in children with intellectual deficits and fragmented sleep: six "N of 1" trials. *J Child Neurol* 1996; 11(4):341-343.

- 1  
2  
3 (15) Hinderer SR. The supraspinal anxiolytic effect of baclofen for spasticity reduction. *Am J Phys*  
4 *Med Rehabil* 1990; 69(5):254-258.  
5  
6 (16) Langer JC, Winthrop AL, Issenman RM. The single-subject randomized trial. A useful clinical  
7 tool for assessing therapeutic efficacy in pediatric practice. *Clin Pediatr (Phila)* 1993;  
8 32(11):654-657.  
9  
10 (17) Lashner BA, Hanauer SB, Silverstein MD. Testing nicotine gum for ulcerative colitis patients.  
11 Experience with single-patient trials. *Dig Dis Sci* 1990; 35(7):827-832.  
12  
13 (18) Maier W, Benkert O. Treatment of chronic depression with sulpiride: evidence of efficacy in  
14 placebo-controlled single case studies. *Psychopharmacology (Berl)* 1994; 115(4):495-501.  
15  
16 (19) Mandelcorn J, Cullen NK, Bayley MT. A preliminary study of the efficacy of ondansetron in the  
17 treatment of ataxia, poor balance and incoordination from brain injury. *Brain Inj* 2004;  
18 18(10):1025-1039.  
19  
20 (20) McQuay HJ, Carroll D, Jadad AR, Glynn CJ, Jack T, Moore RA et al. Dextromethorphan for the  
21 treatment of neuropathic pain: a double-blind randomised controlled crossover trial with integral  
22 n-of-1 design. *Pain* 1994; 59(1):127-133.  
23  
24 (21) Miyazaki S, Nonogi H, Goto Y, Sumiyoshi T, Haze K, Hiramori K. Comparison of the  
25 therapeutic efficacy of continuous and intermittent injection of isosorbide dinitrate: a randomized  
26 study on unstable angina. *Intern Med* 1995; 34(9):856-862.  
27  
28 (22) Nathan PC, Tomlinson G, Dupuis LL, Greenberg ML, Ota S, Bartels U et al. A pilot study of  
29 ondansetron plus metopimazine vs. ondansetron monotherapy in children receiving highly  
30 emetogenic chemotherapy: a Bayesian randomized serial N-of-1 trials design. *Support Care*  
31 *Cancer* 2006; 14(3):268-276.  
32  
33 (23) Parodi O, Maseri A, Simonetti I. Management of unstable angina at rest by verapamil. A double-  
34 blind cross-over study in coronary care unit. *Br Heart J* 1979; 41(2):167-174.  
35  
36 (24) Parodi O, Simonetti I, Michelassi C, Carpeggiani C, Biagini A, L'Abbate A et al. Comparison of  
37 verapamil and propranolol therapy for angina pectoris at rest: a randomized, multiple-crossover,  
38 controlled trial in the coronary care unit. *Am J Cardiol* 1986; 57(11):899-906.  
39  
40 (25) Tison F, Negre-Pages L, Meissner WG, Dupouy S, Li Q, Thiolat ML et al. Simvastatin decreases  
41 levodopa-induced dyskinesia in monkeys, but not in a randomized, placebo-controlled, multiple  
42 cross-over ("n-of-1") exploratory trial of simvastatin against levodopa-induced dyskinesia in  
43 Parkinson's disease patients. *Parkinsonism Relat Disord* 2013; 19(4):416-421.  
44  
45 (26) Joy TR, Monjed A, Zou GY, Hegele RA, McDonald CG, Mahon JL. N-of-1 (single-patient) trials  
46 for statin-related myalgia. *Ann Intern Med* 2014; 160(5):301-310.  
47  
48  
49  
50  
51  
52  
53  
54  
55  
56  
57  
58  
59  
60

Appendix Table 5. Studies reporting person-level treatment effect with both fixed-effect and random-effect using a method of moments estimator

| Study                         | Outcome                                            | Fixed effect model        | P for HTE (fixed-effects model) | Random Treatment Effect    | summary_tau2 | P for HTE (random-effects model) |
|-------------------------------|----------------------------------------------------|---------------------------|---------------------------------|----------------------------|--------------|----------------------------------|
| March 1994 <sup>6</sup>       | Mean pain score on VAS taken from 2nd week of tx   | -4.155 (-4.807 to -3.502) | <0.001                          | -7.093 (-11.939 to -2.248) | 73.530       | <0.001                           |
| March 1994 <sup>6</sup>       | Mean stiffness score on VAS taken from 2nd week of | -2.192 (-2.549 to -1.835) | <0.001                          | -5.992 (-11.280 to -0.704) | 88.872       | <0.001                           |
| Emmanuel 2012 <sup>1</sup>    | Bloating                                           | -0.131 (-0.171 to -0.090) | <0.001                          | -0.344 (-0.619 to -0.069)  | 0.071        | <0.001                           |
| Emmanuel 2012 <sup>1</sup>    | Pain                                               | -0.160 (-0.209 to -0.111) | <0.001                          | -0.440 (-0.771 to -0.110)  | 0.106        | <0.001                           |
| Haas 2004 <sup>2</sup>        | Chronic tension-type headache grade                | 0.733 (0.609 to 0.857)    | <0.001                          | 0.772 (0.454 to 1.090)     | 0.350        | <0.001                           |
| Haas 2004 <sup>2</sup>        | Chronic tension-type headache grade                | 0.543 (0.394 to 0.693)    | 0.067                           | 0.542 (0.354 to 0.731)     | 0.055        | 0.067                            |
| Jaeschke 1991 <sup>3</sup>    | 7-point symptom scale                              | 0.356 (0.286 to 0.426)    | <0.001                          | 0.427 (0.210 to 0.645)     | 0.186        | <0.001                           |
| Jaeschke 1991 <sup>3</sup>    | Tender point changes count                         | 1.072 (0.701 to 1.443)    | <0.001                          | 1.320 (0.404 to 2.236)     | 2.166        | <0.001                           |
| Johannessen 1992 <sup>4</sup> | 6-point symptom scale                              | 0.657 (0.530 to 0.785)    | <0.001                          | 0.698 (0.466 to 0.931)     | 0.382        | <0.001                           |
| Joy 2014 <sup>26</sup>        | VAS myalgia score                                  | 0.119 (-2.283 to 2.521)   | 0.995                           | 0.119 (-2.283 to 2.521)    | 0.000        | 0.996                            |
| Joy 2014 <sup>26</sup>        | Symptom-specific VAS                               | 1.937 (0.179 to 3.696)    | 0.797                           | 1.937 (0.179 to 3.696)     | 0.000        | 0.797                            |
| Joy 2014 <sup>26</sup>        | Pain severity score                                | 0.086 (-0.215 to 0.387)   | 0.986                           | 0.086 (-0.215 to 0.387)    | 0.000        | 0.986                            |

|                              |                                      |                           |        |                             |         |        |
|------------------------------|--------------------------------------|---------------------------|--------|-----------------------------|---------|--------|
| Joy 2014 <sup>26</sup>       | Pain interference score              | -0.016 (-0.095 to 0.064)  | 0.917  | -0.016 (-0.095 to 0.064)    | 0.000   | 0.917  |
| Lipka 2017 <sup>13</sup>     | Quantitative myasthenia gravis score | 1.006 (0.215 to 1.797)    | 0.803  | 1.006 (0.215 to 1.797)      | 0.000   | 0.803  |
| Lipka 2017 <sup>13</sup>     | Myasthenia gravis composite          | 2.952 (0.969 to 4.934)    | 0.177  | 2.891 (0.348 to 5.433)      | 2.631   | 0.177  |
| Lipka 2017 <sup>13</sup>     | MG-ADL                               | 1.110 (0.269 to 1.951)    | 0.047  | 1.099 (-0.277 to 2.474)     | 1.222   | 0.047  |
| Lipka 2017 <sup>13</sup>     | VAS score                            | 1.204 (0.124 to 2.283)    | 0.190  | 1.275 (-0.115 to 2.665)     | 0.739   | 0.190  |
| Mahon 1996 <sup>5</sup>      | Likert Scale (1-7)                   | 0.069 (-0.042 to 0.179)   | <0.001 | 0.145 (-0.153 to 0.443)     | 0.134   | <0.001 |
| Patel 1991 <sup>7</sup>      | 4-item symptom questionnaire         | 0.000 (-0.000 to 0.000)*  | <0.001 | 0.000 (-0.000 to 0.000)*    | 0.000   | <0.001 |
| Pereira 1995 <sup>8</sup>    | INR (diff)                           | 0.027 (-0.155 to 0.209)   | 0.477  | 0.027 (-0.155 to 0.209)     | 0.000   | 0.477  |
| Wallace 1994 <sup>9</sup>    | Conners 15-item rating scale scores  | 0.759 (0.341 to 1.178)    | 0.747  | 0.759 (0.341 to 1.178)      | 0.000   | 0.747  |
| Woodfield 2005 <sup>10</sup> | Number of cramps                     | -5.395 (-7.091 to -3.699) | <0.001 | -18.823 (-28.527 to -9.120) | 161.582 | <0.001 |
| Woodfield 2005 <sup>10</sup> | Total days with cramps               | -7.600 (-8.420 to -6.781) | <0.001 | -6.181 (-9.798 to -2.563)   | 26.245  | <0.001 |
| Zucker 2006 <sup>11</sup>    | FIQ                                  | -5.019 (-8.784 to -1.254) | 0.999  | -5.019 (-8.784 to -1.254)   | 0.000   | 0.999  |

\* Includes one additional trial of Prednisone therapy

Appendix Table 6. Studies reporting person-level outcomes with both fixed-effect and random-effect hierarchical linear model

| Author Year                             | Outcome                                          | Range of the Scales<br>(severity)                                             | Fixed Treatment Effect     | Random Treatment Effect  | P-value Person<br>Treatment<br>Interaction |
|-----------------------------------------|--------------------------------------------------|-------------------------------------------------------------------------------|----------------------------|--------------------------|--------------------------------------------|
| <b>Camfield<br/>1996<sup>14</sup></b>   | Nights without awakening                         | NR                                                                            | 0.865 (0.215 to 1.516)     | 0.84 (0.20 to 1.48)      | 0.456                                      |
| <b>Hinderer<br/>1990<sup>15</sup></b>   | Anxiety                                          | Beck Inventory-A anxiety<br>scale 0-3 (0 = never, 3 =<br>almost all the time) | 0.000 (0.000 to 0.000)     | -1.06 (-1.88 to -0.23)   | <0.001                                     |
| <b>Joy 2014<sup>26</sup></b>            | Myalgia score                                    | Visual Analogue Score for<br>myalgia (0=none to<br>100=worst)                 | 3.3812 (-2.668 to 9.430)   | 3.3522 (-2.617 to 9.322) | 0.566                                      |
| <b>Langer 1993<sup>16</sup></b>         | Vomiting                                         | NR                                                                            | -1.204 (-2.494 to 0.086)   | -1.20 (-2.49 to 0.09)    | 0.136                                      |
| <b>Lashner<br/>1990<sup>17</sup></b>    | Symptom score: abdominal pain                    | Symptom scores 0-100<br>(0=best, 100=worst)                                   | -3.615 (-16.982 to 9.751)  | -3.62 (-15.84 to 8.61)   | 0.007                                      |
|                                         | Symptom score: bowel<br>movements/day            |                                                                               | -0.538 (-1.215 to 0.138)   | -0.56 (-1.22 to 0.09)    | 0.001                                      |
|                                         | Symptom score: consistency of<br>bowel movements |                                                                               | 7.000 (-7.551 to 21.551)   | 7.00 (-6.29 to 20.29)    | 0.013                                      |
|                                         | Symptom score: hematochezia                      |                                                                               | 2.308 (-17.210 to 21.826)  | 2.35 (-17.21 to 21.90)   | 0.003                                      |
|                                         | Symptom score: general sense of<br>well-being    |                                                                               | -6.538 (-25.352 to 12.275) | -6.54 (-23.62 to 10.56)  | 0.008                                      |
| <b>Maier<br/>1994<sup>18</sup></b>      | SCL-90 subscales: Depressed mood                 | NR                                                                            | -3.536 (-6.718 to -0.354)  | -3.63 (-7.40 to 0.15)    | <0.001                                     |
|                                         | SCL-90 subscales: Anxiety                        |                                                                               | -3.753 (-6.582 to -0.924)  | -3.81 (-7.22 to -0.40)   | <0.001                                     |
|                                         | SCL-90 subscales: Somatization                   |                                                                               | -1.419 (-4.316 to 1.478)   | -1.50 (-4.20 to 1.21)    | 0.869                                      |
| <b>Mandelcorn<br/>2004<sup>19</sup></b> | Self-Assessment score                            | 0-5 (0=worst, 5=best)                                                         | -2.052 (-8.865 to 4.761)   | -2.05 (-8.43 to 4.33)    | 0.05                                       |
|                                         | Lower extremity ataxia                           | Fugl-Meyer: 3-point (0<br>cannot be performed to 2 can                        | 12.494 (-3.155 to 28.142)  | 12.49 (-0.85 to 25.84)   | 0.025                                      |

| Author Year                           | Outcome                                             | Range of the Scales<br>(severity)                                                                                                                                                        | Fixed Treatment Effect    | Random Treatment Effect | P-value Person<br>Treatment<br>Interaction |
|---------------------------------------|-----------------------------------------------------|------------------------------------------------------------------------------------------------------------------------------------------------------------------------------------------|---------------------------|-------------------------|--------------------------------------------|
|                                       |                                                     | be fully performed)                                                                                                                                                                      |                           |                         |                                            |
|                                       | Truncal ataxia                                      | AMTI forceplate®: NR<br><br><i>Berg Balance Scale® 0–56,<br/>with a higher score indicating<br/>a better performance</i>                                                                 | 1.196 (-2.866 to 5.257)   | 1.20 (-2.06 to 4.45)    | 0.690                                      |
|                                       | Upper extremity ataxia                              | Purdue Pegboard Test®: pegs<br>inserted into the board with<br>each hand in 30 sec<br><br><i>Minnesota Placing Test®:<br/>reach out, grasp, and place<br/>blocks in a specific order</i> | -0.498 (-3.546 to 2.550)  | -0.50 (-3.10 to 2.10)   | 0.382                                      |
| <b>McQuay<br/>1994<sup>20</sup></b>   | VAS Pain Intensity                                  | 0-100 (0 = no pain, 100 =<br>worst possible pain)                                                                                                                                        | -1.094 (-5.572 to 3.383)  | -1.06 (-5.16 to 3.04)   | 0.004                                      |
|                                       | VAS Relief Intensity                                | 0-100 (0 = no relief, 100<br>=complete pain relief)                                                                                                                                      | -3.913 (-11.729 to 3.903) | -3.86 (-11.11 to 3.40)  | 0.038                                      |
| <b>Miyazaki<br/>1995<sup>21</sup></b> | Incidence of angina                                 | Either ST-segment elevation<br>or depression at rest                                                                                                                                     | 0.496 (-0.206 to 1.199)   | 0.47 (-0.32 to 1.26)    | 0.125                                      |
| <b>Nathan 2006<sup>22</sup></b>       | Emetic episodes per day                             | complete response (0<br>episodes/day), major response<br>(1–2 episodes/day), or failure<br>(>2 episodes/day)                                                                             | -0.095 (-0.514 to 0.325)  | -0.56 (-1.74 to 0.62)   | 0.001                                      |
| <b>Parodi<br/>1979<sup>23</sup></b>   | Ischemic attacks                                    | ST elevation or depression<br>(details NR)                                                                                                                                               | -1.544 (-1.838 to -1.251) | -1.63 (-2.10 to -1.17)  | 0.007                                      |
| <b>Parodi<br/>1986<sup>24</sup></b>   | Asymptomatic ST elevation<br><br>(After verapamil)  | NR                                                                                                                                                                                       | -1.637 (-1.994 to -1.279) | -1.97 (-2.92 to -1.01)  | 0.110                                      |
|                                       | Asymptomatic ST depression<br><br>(After verapamil) |                                                                                                                                                                                          | -1.083 (-1.903 to -0.262) | -0.82 (-2.54 to 0.90)   | 0.401                                      |



| Author Year                     | Outcome                                           | Range of the Scales<br>(severity)                                            | Fixed Treatment Effect    | Random Treatment Effect   | P-value Person<br>Treatment<br>Interaction |
|---------------------------------|---------------------------------------------------|------------------------------------------------------------------------------|---------------------------|---------------------------|--------------------------------------------|
|                                 | Symptomatic ST elevation<br>(After verapamil)     |                                                                              | -1.580 (-1.906 to -1.254) | -1.87 (-2.72 to -1.02)    | <0.001                                     |
|                                 | Symptomatic ST Depression<br>(After verapamil)    |                                                                              | -0.990 (-1.411 to -0.569) | -0.98 (-1.84 to -0.13)    | 0.002                                      |
|                                 | Asymptomatic ST elevation<br>(After propranolol)  |                                                                              | 0.100 (-0.086 to 0.286)   | -1.966 (-2.917 to -1.014) | 0.006                                      |
|                                 | Asymptomatic ST depression<br>(After propranolol) |                                                                              | 0.339 (-0.168 to 0.845)   | -0.821 (-2.539 to 0.897)  | 0.964                                      |
|                                 | Symptomatic ST elevation<br>(After propranolol)   |                                                                              | -0.002 (-0.177 to 0.173)  | -1.868 (-2.718 to -1.017) | 0.063                                      |
|                                 | Symptomatic ST Depression<br>(After propranolol)  |                                                                              | -0.374 (-0.709 to -0.039) | -0.981 (-1.835 to -0.126) | 0.023                                      |
| <b>Pereira 1995<sup>8</sup></b> | INR                                               | Target INR range of 2.0–3.0                                                  |                           | -0.12 (-0.30 to 0.07)     | 0.433                                      |
| <b>Tison 2012<sup>25</sup></b>  | Troublesome dyskinesia                            | 7 points scale (1=extremely<br>uncomfortable, 7=not at all<br>uncomfortable) |                           | 0.20 (-0.40 to 0.80)      | 0.593                                      |

## Statistical codes for analysis results of studies reporting person-level treatment effects

Estimation of standard errors in the following studies

- Emmanuel 2012:  $gen\ SE\_Intervention\ (or\ control) = SD\ of\ intervention\ (or\ control)\ score / \sqrt{\text{Intervention days (or control days)}}$
- Haas 2004: SE was available in Table 4 of the original paper
- Jaeschke 1991, Patel 1991, March 1994, Woodfield 2005, Wallace 1994 - SE was derived using the p-value of one-sided paired t-test of the difference in score using the following code:  
generate t\_stat = invt(2,p\_value)  
generate se = abs(mean\_outcome/t\_stat)
- Johannessen 1992, Pereira 1995, Zucker 2006, Joy 2014, Lipka 2017 – SE was derived from the 95% confidence interval using the following code: generate se =  $(UCI - LCI) / (2 * \text{invnorm}(0.975))$
- Mahon 1996: SE was derived from 95% confidence interval based on Student's t distribution using the following code: generate se =  $(UCI - LCI) / (2 * \text{invt}(DF, 0.975))$

metan difference se\_difference if Outcome == "outcome", random \*\*/fixedi is used for fixed effect model

local p = r(p\_het)

local sum\_es = r(ES)

local sum\_es\_se = r(seES)

local tau2= r(tau2)

local I\_sq = r(i\_sq)

post `memory' ("`study'") ("`outcome'") (`sum\_es') (`sum\_es\_se') (`tau2') (`I\_sq') (`p')

**Statistical codes for analysis results of studies reporting person-level outcome effects**

```
1
2
3
4
5 egen id = group(Patient)
6
7 generate tx = 0 if Exposure == "Placebo"
8
9     replace tx = 1 if Exposure == "Intervention"
10
11 egen period_seq = seq(), from(1) to(18) */varies based on the number of periods*/
12
13 local outcome = "Specific_outcome"
14
15     /* fixed baselines and random treatment effects */
16
17     xtmixed Result tx i.id || id: tx if Outcome == "`outcome'" , nocons
18
19         estimates store D
20
21         matrix estimates = e(b)
22
23         local point_estimate_ran_bas_ran_tx = estimates[1,1]
24
25         local sd_estimate_rand_base_random_tx = (exp(estimates[1,10]))
26
27
28
29
30         matrix variances = e(V)
31
32         local point_se_rand_base_random_tx = sqrt(variances[1,1])
33
34         local point_low_ran_bas_ran_tx = `point_estimate_ran_bas_ran_tx' - invnormal(0.975) * `point_se_rand_base_random_tx'
35
36         local point_up_ran_bas_ran_tx = `point_estimate_ran_bas_ran_tx' + invnormal(0.975) * `point_se_rand_base_random_tx'
37
38
39
40         local sd_se_rand_base_random_tx = sqrt(variances[10,10])
41
42
43
44
45
46
47
```

```
1
2
3         local sd_lower_rand_base_random_tx = (exp(ln(`sd_estimate_rand_base_random_tx')) - invnormal(0.975) *
4 `sd_se_rand_base_random_tx'))
5
6         local sd_upper_rand_base_random_tx = (exp(ln(`sd_estimate_rand_base_random_tx')) + invnormal(0.975) *
7 `sd_se_rand_base_random_tx'))
8
9
10
11
12 /* fixed baselines and common treatment effect -- linear regression */
13
14 xtmixed Result tx i.id || id: if Outcome == "`outcome'" , nocons
15
16     estimates store E
17
18
19
20 /* fixed baselines and person interactions */
21
22 regress Result i.tx##i.id if Outcome == "`outcome'"
23
24     estimates store F
25
26
27
28 /* fixed baselines and common effects */
29
30 regress Result tx i.id if Outcome == "`outcome'"
31
32     estimates store G
33
34
35
36     matrix estimates = e(b)
37
38     local point_estimate_fix_bas_com_tx = estimates[1,1]
39
40
41
42
43
44
45
46
47
```

```
1
2
3     matrix variances = e(V)
4
```

```
5     local point_se_fix_bas_common_tx = sqrt(variances[1,1])
6
```

```
7     local t_stat = `point_estimate_fix_bas_com_tx' / `point_se_fix_bas_common_tx'
```

```
8
9     local point_low_fix_bas_com_tx = `point_estimate_fix_bas_com_tx' - invt(e(df_r), 0.975) * `point_se_fix_bas_common_tx'
```

```
10
11     local point_up_fix_bas_com_tx = `point_estimate_fix_bas_com_tx' + invt(e(df_r), 0.975) * `point_se_fix_bas_common_tx'
```

```
12
13
14
15 lrtest D E
```

```
16
17     local p_random_RANDOM_FIXED_tx = r(p)
```

```
18
19
20
21 lrtest F G
```

```
22
23     local p_person_by_treat = r(p)
```

```
24
25
26
27     post `memory' ("Study") ("`outcome'")
```

```
28
29 Please note: Depending on the outcome, xtmixed or meqrlogit or meqrpoisson was used.
30
31
32
33
34
35
36
37
38
39
40
41
42
43
44
45
46
47
```

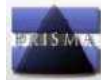

# PRISMA 2009 Checklist

| Section/topic                      | #  | Checklist item                                                                                                                                                                                                                                                                                              | Reported on page # |
|------------------------------------|----|-------------------------------------------------------------------------------------------------------------------------------------------------------------------------------------------------------------------------------------------------------------------------------------------------------------|--------------------|
| <b>TITLE</b>                       |    |                                                                                                                                                                                                                                                                                                             |                    |
| Title                              | 1  | Identify the report as a systematic review, meta-analysis, or both.                                                                                                                                                                                                                                         | 1                  |
| <b>ABSTRACT</b>                    |    |                                                                                                                                                                                                                                                                                                             |                    |
| Structured summary                 | 2  | Provide a structured summary including, as applicable: background; objectives; data sources; study eligibility criteria, participants, and interventions; study appraisal and synthesis methods; results; limitations; conclusions and implications of key findings; systematic review registration number. | 2                  |
| <b>INTRODUCTION</b>                |    |                                                                                                                                                                                                                                                                                                             |                    |
| Rationale                          | 3  | Describe the rationale for the review in the context of what is already known.                                                                                                                                                                                                                              | 1-2                |
| Objectives                         | 4  | Provide an explicit statement of questions being addressed with reference to participants, interventions, comparisons, outcomes, and study design (PICOS).                                                                                                                                                  | 2                  |
| <b>METHODS</b>                     |    |                                                                                                                                                                                                                                                                                                             |                    |
| Protocol and registration          | 5  | Indicate if a review protocol exists, if and where it can be accessed (e.g., Web address), and, if available, provide registration information including registration number.                                                                                                                               | n/a                |
| Eligibility criteria               | 6  | Specify study characteristics (e.g., PICOS, length of follow-up) and report characteristics (e.g., years considered, language, publication status) used as criteria for eligibility, giving rationale.                                                                                                      | 5-6                |
| Information sources                | 7  | Describe all information sources (e.g., databases with dates of coverage, contact with study authors to identify additional studies) in the search and date last searched.                                                                                                                                  | 5-6                |
| Search                             | 8  | Present full electronic search strategy for at least one database, including any limits used, such that it could be repeated.                                                                                                                                                                               | a1-a3              |
| Study selection                    | 9  | State the process for selecting studies (i.e., screening, eligibility, included in systematic review, and, if applicable, included in the meta-analysis).                                                                                                                                                   | 6                  |
| Data collection process            | 10 | Describe method of data extraction from reports (e.g., piloted forms, independently, in duplicate) and any processes for obtaining and confirming data from investigators.                                                                                                                                  | 6-7                |
| Data items                         | 11 | List and define all variables for which data were sought (e.g., PICOS, funding sources) and any assumptions and simplifications made.                                                                                                                                                                       | 6-8                |
| Risk of bias in individual studies | 12 | Describe methods used for assessing risk of bias of individual studies (including specification of whether this was done at the study or outcome level), and how this information is to be used in any data synthesis.                                                                                      | n/a                |
| Summary measures                   | 13 | State the principal summary measures (e.g., risk ratio, difference in means).                                                                                                                                                                                                                               | 8-9                |
| Synthesis of results               | 14 | Describe the methods of handling data and combining results of studies, if done, including measures of consistency (e.g., $I^2$ ) for each meta-analysis.                                                                                                                                                   | 8-9                |



# PRISMA 2009 Checklist

Page 1 of 2

| Section/topic                 | #  | Checklist item                                                                                                                                                                                           | Reported on page # |
|-------------------------------|----|----------------------------------------------------------------------------------------------------------------------------------------------------------------------------------------------------------|--------------------|
| Risk of bias across studies   | 15 | Specify any assessment of risk of bias that may affect the cumulative evidence (e.g., publication bias, selective reporting within studies).                                                             | n/a                |
| Additional analyses           | 16 | Describe methods of additional analyses (e.g., sensitivity or subgroup analyses, meta-regression), if done, indicating which were pre-specified.                                                         | 8-9                |
| <b>RESULTS</b>                |    |                                                                                                                                                                                                          |                    |
| Study selection               | 17 | Give numbers of studies screened, assessed for eligibility, and included in the review, with reasons for exclusions at each stage, ideally with a flow diagram.                                          | 9, 20, 21, 29      |
| Study characteristics         | 18 | For each study, present characteristics for which data were extracted (e.g., study size, PICOS, follow-up period) and provide the citations.                                                             | 1-12, 22-26        |
| Risk of bias within studies   | 19 | Present data on risk of bias of each study and, if available, any outcome level assessment (see item 12).                                                                                                | n/a                |
| Results of individual studies | 20 | For all outcomes considered (benefits or harms), present, for each study: (a) simple summary data for each intervention group (b) effect estimates and confidence intervals, ideally with a forest plot. | 31, a11-a50        |
| Synthesis of results          | 21 | Present results of each meta-analysis done, including confidence intervals and measures of consistency.                                                                                                  | 10-12, 26          |
| Risk of bias across studies   | 22 | Present results of any assessment of risk of bias across studies (see Item 15).                                                                                                                          | n/a                |
| Additional analysis           | 23 | Give results of additional analyses, if done (e.g., sensitivity or subgroup analyses, meta-regression [see Item 16]).                                                                                    | 12, a53-a57        |
| <b>DISCUSSION</b>             |    |                                                                                                                                                                                                          |                    |
| Summary of evidence           | 24 | Summarize the main findings including the strength of evidence for each main outcome; consider their relevance to key groups (e.g., healthcare providers, users, and policy makers).                     | 12-14              |
| Limitations                   | 25 | Discuss limitations at study and outcome level (e.g., risk of bias), and at review-level (e.g., incomplete retrieval of identified research, reporting bias).                                            | 15-16              |
| Conclusions                   | 26 | Provide a general interpretation of the results in the context of other evidence, and implications for future research.                                                                                  | 16                 |
| <b>FUNDING</b>                |    |                                                                                                                                                                                                          |                    |
| Funding                       | 27 | Describe sources of funding for the systematic review and other support (e.g., supply of data); role of funders for the systematic review.                                                               | 17                 |

From: Moher D, Liberati A, Tetzlaff J, Altman DG, The PRISMA Group (2009). Preferred Reporting Items for Systematic Reviews and Meta-Analyses: The PRISMA Statement. PLoS Med 6(6): e1000097. doi:10.1371/journal.pmed1000097

For more information, visit: [www.prisma-statement.org](http://www.prisma-statement.org)  
 For peer review only - <http://bmjopen.bmj.com/site/about/guidelines.xhtml>



# PRISMA 2009 Checklist

For peer review only

- 1
- 2
- 3
- 4
- 5
- 6
- 7
- 8
- 9
- 10
- 11
- 12
- 13
- 14
- 15
- 16
- 17
- 18
- 19
- 20
- 21
- 22
- 23
- 24
- 25
- 26
- 27
- 28
- 29
- 30
- 31
- 32
- 33
- 34
- 35
- 36
- 37
- 38
- 39
- 40
- 41
- 42
- 43
- 44
- 45
- 46
- 47
